# Supplementary material
Source: MDPI journal article supplement (https://www.mdpi.com/2311-7524/9/2/242)
Supplement: s1 [file s1]

Archive with 5 entries (5 files):
- supplementary Fig.S1-S2.pdf
- Supplementary Table S1-S6.xls
- Supplementary Table S7.pdf
- Supplementary Table S8.xls
- Supplementary Table S9-S10.pdf
