# Supplementary material
Source: MDPI journal article supplement (https://www.mdpi.com/2311-7524/9/2/242)
Supplement: s1 [file s1 › Supplementary Table S1-S6.xls]

## Sheet: Table S1
Supplementary Table S1. Statistics data from Illumina sequencing on two lines
Samples	Clean reads	Clean bases	GC Content	%≥Q30
OH0-1	28087285	8386034032	0.4358	0.9374
OH0-2	20302785	6062295544	0.4361	0.9573
OH0-3	21138010	6312130994	0.4354	0.9558
OH12-1	34439083	10295343158	0.4295	0.9298
OH12-2	35502627	10622102330	0.4288	0.9305
OH12-3	30897090	9237579394	0.4292	0.9294
OH24-1	22850172	6826688938	0.4342	0.9555
OH24-2	34128498	10209683600	0.4336	0.932
OH24-3	27352152	8173079202	0.4337	0.9259
IBL0-1	36542843	10922475212	0.437	0.9361
IBL0-2	31902683	9536439146	0.4374	0.9343
IBL0-3	25741778	7683169750	0.4379	0.9237
IBL12-1	22731881	6785721066	0.4309	0.959
IBL12-2	25433332	7593517796	0.4439	0.9345
IBL12-3	21238890	6346625936	0.4305	0.9528
IBL24-1	43744666	13072903640	0.4305	0.9265
IBL24-2	28423659	8483694708	0.4328	0.9545
IBL24-3	26564984	7931606686	0.441	0.952

## Sheet: Table S2
Supplementary Table S2. Total reads mapped to the S. lycopersicum reference genome ITAG4.0
Samples	Total Reads	Mapped Reads	Uniq Mapped Reads	Multiple Map Reads	Reads Map to '+'	Reads Map to '-'	average Mapped Reads	average of all libraries in each line
OH0-1	56174570	54,545,303 (97.10%)	52,196,803 (92.92%)	2,348,500 (4.18%)	29,835,861 (53.11%)	29,864,548 (53.16%)
OH0-2	40605570	39,482,420 (97.23%)	37,882,654 (93.29%)	1,599,766 (3.94%)	21,500,091 (52.95%)	21,508,763 (52.97%)
OH0-3	42276020	41,125,493 (97.28%)	39,445,884 (93.31%)	1,679,609 (3.97%)	22,336,919 (52.84%)	22,339,120 (52.84%)	0.972033
OH12-1	68878166	66,378,516 (96.37%)	63,738,015 (92.54%)	2,640,501 (3.83%)	35,839,051 (52.03%)	35,861,405 (52.06%)
OH12-2	71005254	68,636,241 (96.66%)	65,898,654 (92.81%)	2,737,587 (3.86%)	36,997,786 (52.11%)	37,021,289 (52.14%)
OH12-3	61794180	59,649,437 (96.53%)	57,373,414 (92.85%)	2,276,023 (3.68%)	32,001,493 (51.79%)	32,022,306 (51.82%)	0.9652
OH24-1	45700344	44,035,575 (96.36%)	41,951,067 (91.80%)	2,084,508 (4.56%)	24,187,469 (52.93%)	24,189,373 (52.93%)
OH24-2	68256996	64,524,453 (94.53%)	61,132,865 (89.56%)	3,391,588 (4.97%)	35,887,239 (52.58%)	35,913,413 (52.61%)
OH24-3	54704304	51,633,963 (94.39%)	48,920,228 (89.43%)	2,713,735 (4.96%)	28,787,575 (52.62%)	28,822,512 (52.69%)	0.950933	0.962722
IBL0-1	73085686	70,382,810 (96.30%)	66,682,474 (91.24%)	3,700,336 (5.06%)	38,591,953 (52.80%)	39,222,279 (53.67%)
IBL0-2	63805366	61,103,570 (95.77%)	57,908,576 (90.76%)	3,194,994 (5.01%)	33,515,008 (52.53%)	34,098,723 (53.44%)
IBL0-3	51483556	49,106,707 (95.38%)	46,386,544 (90.10%)	2,720,163 (5.28%)	27,009,114 (52.46%)	27,575,034 (53.56%)	0.958167
IBL12-1	45463762	43,926,745 (96.62%)	41,521,123 (91.33%)	2,405,622 (5.29%)	24,185,601 (53.20%)	24,430,256 (53.74%)
IBL12-2	50866664	45,421,783 (89.30%)	40,744,213 (80.10%)	4,677,570 (9.20%)	28,899,836 (56.81%)	29,332,697 (57.67%)
IBL12-3	42477780	40,739,082 (95.91%)	38,256,942 (90.06%)	2,482,140 (5.84%)	22,556,771 (53.10%)	22,985,420 (54.11%)	0.939433
IBL24-1	87489332	83,693,569 (95.66%)	78,810,972 (90.08%)	4,882,597 (5.58%)	46,178,306 (52.78%)	46,737,752 (53.42%)
IBL24-2	56847318	54,668,557 (96.17%)	51,225,679 (90.11%)	3,442,878 (6.06%)	30,342,109 (53.37%)	30,908,428 (54.37%)
IBL24-3	53129968	48,935,321 (92.10%)	44,752,711 (84.23%)	4,182,610 (7.87%)	29,375,536 (55.29%)	29,994,228 (56.45%)	0.946433	0.948011

## Sheet: Table S3
Supplementary Table S3. Enriched functional groups in biological process ontology (BP) in genes with different expression patterns between resistant and susceptible lines
ID	Description	Count	GeneRatio	BgRatio	enrich_factor	pvalue	qvalue	geneID	gene_name
GO:1904668	positive regulation of ubiquitin protein ligase activity	5	5/714	6/10829	12.64	6.98e-06	0.00800188	Solyc03g096870.3/Solyc06g043150.4/Solyc06g072830.4/Solyc08g005420.3/Solyc08g080080.4	Solyc03g096870.3;Solyc06g043150.4;Solyc06g072830.4;Solyc08g005420.3;Solyc08g080080.4
GO:0006270	DNA replication initiation	6	6/714	12/10829	7.58	5.27e-05	0.030228	Solyc01g079500.4/Solyc01g110130.3/Solyc02g070780.4/Solyc02g082180.3/Solyc07g005020.3/Solyc11g040120.3	Solyc01g079500.4;Solyc01g110130.3;Solyc02g070780.4;Solyc02g082180.3;Solyc07g005020.3;Solyc11g040120.3
GO:0005975	carbohydrate metabolic process	42	42/714	403/10829	1.58	0.00204812	0.740166	Solyc01g008620.4/Solyc02g061770.4/Solyc02g080310.2/Solyc02g086090.4/Solyc02g086700.4/Solyc03g007940.4/Solyc03g019790.3/Solyc03g094020.3/Solyc03g116590.3/Solyc03g117750.3/Solyc04g014410.4/Solyc04g015190.3/Solyc04g076630.3/Solyc04g076640.3/Solyc04g076660.3/Solyc05g005170.4/Solyc05g007260.3/Solyc05g012110.4/Solyc05g013810.4/Solyc05g049980.3/Solyc06g050130.3/Solyc06g053380.3/Solyc06g076170.4/Solyc07g…	Solyc01g008620.4;Solyc02g061770.4;Solyc02g080310.2;Solyc02g086090.4;Solyc02g086700.4;Solyc03g007940.4;Solyc03g019790.3;Solyc03g094020.3;Solyc03g116590.3;Solyc03g117750.3;Solyc04g014410.4;Solyc04g015190.3;Solyc04g076630.3;Solyc04g076640.3;Solyc04g076660.3;Solyc05g005170.4;Solyc05g007260.3;Solyc05g012110.4;Solyc05g013810.4;Solyc05g049980.3;Solyc06g050130.3;Solyc06g053380.3;Solyc06g076170.4;Solyc07g…
GO:0006066	alcohol metabolic process	3	3/714	5/10829	9.1	0.00258122	0.740166	Solyc03g098460.3/Solyc07g045190.3/Solyc11g069780.3	Solyc03g098460.3;Solyc07g045190.3;Solyc11g069780.3
GO:0010264	myo-inositol hexakisphosphate biosynthetic process	2	2/714	2/10829	15.17	0.00434161	0.771698	Solyc06g076950.3/Solyc11g069780.3	Solyc06g076950.3;Solyc11g069780.3
GO:0055085	transmembrane transport	15	15/714	108/10829	2.11	0.00470032	0.771698	Solyc01g060070.3/Solyc01g091840.4/Solyc01g150169.1/Solyc02g037550.3/Solyc02g083740.2/Solyc02g091240.1/Solyc04g009790.4/Solyc04g082040.3/Solyc06g036100.3/Solyc07g006370.1/Solyc08g061980.4/Solyc08g082990.3/Solyc10g012050.3/Solyc10g078370.2/Solyc12g014110.2	Solyc01g060070.3;Solyc01g091840.4;Solyc01g150169.1;Solyc02g037550.3;Solyc02g083740.2;Solyc02g091240.1;Solyc04g009790.4;Solyc04g082040.3;Solyc06g036100.3;Solyc07g006370.1;Solyc08g061980.4;Solyc08g082990.3;Solyc10g012050.3;Solyc10g078370.2;Solyc12g014110.2
GO:0042273	ribosomal large subunit biogenesis	5	5/714	18/10829	4.21	0.00511727	0.771698	Solyc04g016380.3/Solyc08g006470.4/Solyc08g008160.4/Solyc10g078660.2/Solyc10g083740.3	Solyc04g016380.3;Solyc08g006470.4;Solyc08g008160.4;Solyc10g078660.2;Solyc10g083740.3
GO:0048544	recognition of pollen	12	12/714	82/10829	2.22	0.00719669	0.771698	Solyc02g079550.3/Solyc02g079570.4/Solyc03g007790.3/Solyc03g078360.1/Solyc04g077340.3/Solyc04g077360.3/Solyc04g077370.2/Solyc07g055670.1/Solyc07g063750.3/Solyc07g063820.3/Solyc09g009150.1/Solyc09g075910.1	Solyc02g079550.3;Solyc02g079570.4;Solyc03g007790.3;Solyc03g078360.1;Solyc04g077340.3;Solyc04g077360.3;Solyc04g077370.2;Solyc07g055670.1;Solyc07g063750.3;Solyc07g063820.3;Solyc09g009150.1;Solyc09g075910.1
GO:0048236	plant-type sporogenesis	4	4/714	13/10829	4.67	0.00829183	0.771698	Solyc01g044558.1/Solyc01g107250.3/Solyc06g075640.2/Solyc07g005800.2	Solyc01g044558.1;Solyc01g107250.3;Solyc06g075640.2;Solyc07g005800.2
GO:0006629	lipid metabolic process	21	21/714	184/10829	1.73	0.00968594	0.771698	Solyc02g032850.3/Solyc02g067660.4/Solyc02g077430.4/Solyc02g094400.4/Solyc03g005280.4/Solyc03g098460.3/Solyc03g119980.3/Solyc04g040120.1/Solyc04g040130.1/Solyc04g077860.4/Solyc04g078790.3/Solyc06g074410.4/Solyc07g045190.3/Solyc08g007225.1/Solyc08g078090.1/Solyc09g082760.3/Solyc10g055240.2/Solyc12g010910.2/Solyc12g038160.2/Solyc12g045035.1/Solyc12g045037.1	Solyc02g032850.3;Solyc02g067660.4;Solyc02g077430.4;Solyc02g094400.4;Solyc03g005280.4;Solyc03g098460.3;Solyc03g119980.3;Solyc04g040120.1;Solyc04g040130.1;Solyc04g077860.4;Solyc04g078790.3;Solyc06g074410.4;Solyc07g045190.3;Solyc08g007225.1;Solyc08g078090.1;Solyc09g082760.3;Solyc10g055240.2;Solyc12g010910.2;Solyc12g038160.2;Solyc12g045035.1;Solyc12g045037.1
GO:0007050	cell cycle arrest	3	3/714	8/10829	5.69	0.0124422	0.771698	Solyc01g108610.3/Solyc02g090680.3/Solyc09g061280.4	Solyc01g108610.3;Solyc02g090680.3;Solyc09g061280.4
GO:0006865	amino acid transport	2	2/714	3/10829	10.11	0.0124538	0.771698	Solyc01g060070.3/Solyc05g008770.3	Solyc01g060070.3;Solyc05g008770.3
GO:0019521	D-gluconate metabolic process	2	2/714	3/10829	10.11	0.0124538	0.771698	Solyc05g010260.4/Solyc12g056120.1	Solyc05g010260.4;Solyc12g056120.1
GO:0044210	'de novo' CTP biosynthetic process	2	2/714	3/10829	10.11	0.0124538	0.771698	Solyc01g056850.3/Solyc02g082190.3	Solyc01g056850.3;Solyc02g082190.3
GO:0043086	negative regulation of catalytic activity	6	6/714	32/10829	2.84	0.0166897	0.771698	Solyc03g095780.3/Solyc07g065090.2/Solyc08g082180.3/Solyc09g011030.3/Solyc09g014480.3/Solyc10g076410.1	Solyc03g095780.3;Solyc07g065090.2;Solyc08g082180.3;Solyc09g011030.3;Solyc09g014480.3;Solyc10g076410.1
GO:0007140	male meiotic nuclear division	3	3/714	9/10829	5.06	0.0177599	0.771698	Solyc01g044558.1/Solyc06g075640.2/Solyc07g005800.2	Solyc01g044558.1;Solyc06g075640.2;Solyc07g005800.2
GO:0006098	pentose-phosphate shunt	4	4/714	16/10829	3.79	0.0180258	0.771698	Solyc05g007260.3/Solyc05g010260.4/Solyc05g012110.4/Solyc12g056120.1	Solyc05g007260.3;Solyc05g010260.4;Solyc05g012110.4;Solyc12g056120.1
GO:0030245	cellulose catabolic process	5	5/714	24/10829	3.16	0.0182949	0.771698	Solyc04g081300.4/Solyc05g005080.3/Solyc07g049300.3/Solyc08g081620.4/Solyc09g075360.4	Solyc04g081300.4;Solyc05g005080.3;Solyc07g049300.3;Solyc08g081620.4;Solyc09g075360.4
GO:0009755	hormone-mediated signaling pathway	12	12/714	93/10829	1.96	0.0187732	0.771698	Solyc01g107250.3/Solyc02g091840.3/Solyc03g095780.3/Solyc03g118540.4/Solyc05g009170.3/Solyc06g084320.1/Solyc07g063850.3/Solyc08g082180.3/Solyc09g064820.1/Solyc09g065870.4/Solyc10g076410.1/Solyc10g083740.3	Solyc01g107250.3;Solyc02g091840.3;Solyc03g095780.3;Solyc03g118540.4;Solyc05g009170.3;Solyc06g084320.1;Solyc07g063850.3;Solyc08g082180.3;Solyc09g064820.1;Solyc09g065870.4;Solyc10g076410.1;Solyc10g083740.3
GO:0071396	cellular response to lipid	8	8/714	52/10829	2.33	0.0196001	0.771698	Solyc01g107250.3/Solyc03g095780.3/Solyc04g077860.4/Solyc05g009170.3/Solyc06g084320.1/Solyc08g082180.3/Solyc09g064820.1/Solyc10g076410.1	Solyc01g107250.3;Solyc03g095780.3;Solyc04g077860.4;Solyc05g009170.3;Solyc06g084320.1;Solyc08g082180.3;Solyc09g064820.1;Solyc10g076410.1
GO:0006506	GPI anchor biosynthetic process	5	5/714	25/10829	3.03	0.021662	0.771698	Solyc01g006000.3/Solyc02g081610.3/Solyc02g083260.3/Solyc03g026290.3/Solyc03g026300.4	Solyc01g006000.3;Solyc02g081610.3;Solyc02g083260.3;Solyc03g026290.3;Solyc03g026300.4
GO:0010411	xyloglucan metabolic process	6	6/714	34/10829	2.68	0.0221637	0.771698	Solyc01g081060.4/Solyc03g031800.3/Solyc03g098430.4/Solyc04g008210.2/Solyc12g017240.2/Solyc12g098603.1	Solyc01g081060.4;Solyc03g031800.3;Solyc03g098430.4;Solyc04g008210.2;Solyc12g017240.2;Solyc12g098603.1
GO:0006541	glutamine metabolic process	4	4/714	17/10829	3.57	0.0223708	0.771698	Solyc01g056850.3/Solyc02g082190.3/Solyc03g034320.3/Solyc08g081150.4	Solyc01g056850.3;Solyc02g082190.3;Solyc03g034320.3;Solyc08g081150.4
GO:0055088	lipid homeostasis	2	2/714	4/10829	7.58	0.0238218	0.771698	Solyc07g032170.3/Solyc08g078390.4	Solyc07g032170.3;Solyc08g078390.4
GO:0080027	response to herbivore	2	2/714	4/10829	7.58	0.0238218	0.771698	Solyc03g006550.4/Solyc07g040690.3	Solyc03g006550.4;Solyc07g040690.3
GO:1902626	assembly of large subunit precursor of preribosome	2	2/714	4/10829	7.58	0.0238218	0.771698	Solyc10g078660.2/Solyc10g083740.3	Solyc10g078660.2;Solyc10g083740.3
GO:0009556	microsporogenesis	3	3/714	10/10829	4.55	0.0241477	0.771698	Solyc01g044558.1/Solyc01g107250.3/Solyc06g075640.2	Solyc01g044558.1;Solyc01g107250.3;Solyc06g075640.2
GO:0034314	Arp2/3 complex-mediated actin nucleation	3	3/714	10/10829	4.55	0.0241477	0.771698	Solyc02g094320.3/Solyc09g090550.3/Solyc12g098430.2	Solyc02g094320.3;Solyc09g090550.3;Solyc12g098430.2
GO:0032870	cellular response to hormone stimulus	13	13/714	110/10829	1.79	0.0286648	0.771698	Solyc01g044556.1/Solyc01g107250.3/Solyc03g095780.3/Solyc03g118540.4/Solyc04g077860.4/Solyc05g009170.3/Solyc06g084320.1/Solyc07g063850.3/Solyc08g082180.3/Solyc09g064820.1/Solyc09g065870.4/Solyc10g076410.1/Solyc10g083740.3	Solyc01g044556.1;Solyc01g107250.3;Solyc03g095780.3;Solyc03g118540.4;Solyc04g077860.4;Solyc05g009170.3;Solyc06g084320.1;Solyc07g063850.3;Solyc08g082180.3;Solyc09g064820.1;Solyc09g065870.4;Solyc10g076410.1;Solyc10g083740.3
GO:0008643	carbohydrate transport	6	6/714	36/10829	2.53	0.0287331	0.771698	Solyc01g091840.4/Solyc01g099870.3/Solyc02g071520.3/Solyc06g072620.4/Solyc07g049310.3/Solyc09g074530.3	Solyc01g091840.4;Solyc01g099870.3;Solyc02g071520.3;Solyc06g072620.4;Solyc07g049310.3;Solyc09g074530.3
GO:0000079	regulation of cyclin-dependent protein serine/threonine kinase activity	4	4/714	19/10829	3.19	0.0328273	0.771698	Solyc01g089850.4/Solyc01g098930.3/Solyc02g082820.3/Solyc03g093790.3	Solyc01g089850.4;Solyc01g098930.3;Solyc02g082820.3;Solyc03g093790.3
GO:0031408	oxylipin biosynthetic process	4	4/714	19/10829	3.19	0.0328273	0.771698	Solanum_lycopersicum_newGene_2882/Solyc01g099150.5.1/Solyc01g099160.4/Solyc08g014000.3	--;Solyc01g099150.5.1;Solyc01g099160.4;Solyc08g014000.3
GO:0042546	cell wall biogenesis	7	7/714	47/10829	2.26	0.0330284	0.771698	Solyc01g081060.4/Solyc03g031800.3/Solyc03g098430.4/Solyc03g115830.2/Solyc04g008210.2/Solyc12g017240.2/Solyc12g098603.1	Solyc01g081060.4;Solyc03g031800.3;Solyc03g098430.4;Solyc03g115830.2;Solyc04g008210.2;Solyc12g017240.2;Solyc12g098603.1
GO:0071495	cellular response to endogenous stimulus	13	13/714	113/10829	1.74	0.0347244	0.771698	Solyc01g044556.1/Solyc01g107250.3/Solyc03g095780.3/Solyc03g118540.4/Solyc04g077860.4/Solyc05g009170.3/Solyc06g084320.1/Solyc07g063850.3/Solyc08g082180.3/Solyc09g064820.1/Solyc09g065870.4/Solyc10g076410.1/Solyc10g083740.3	Solyc01g044556.1;Solyc01g107250.3;Solyc03g095780.3;Solyc03g118540.4;Solyc04g077860.4;Solyc05g009170.3;Solyc06g084320.1;Solyc07g063850.3;Solyc08g082180.3;Solyc09g064820.1;Solyc09g065870.4;Solyc10g076410.1;Solyc10g083740.3
GO:0009738	abscisic acid-activated signaling pathway	6	6/714	38/10829	2.39	0.0364678	0.771698	Solyc03g095780.3/Solyc06g050500.2/Solyc06g084320.1/Solyc08g082180.3/Solyc09g064820.1/Solyc10g076410.1	Solyc03g095780.3;Solyc06g050500.2;Solyc06g084320.1;Solyc08g082180.3;Solyc09g064820.1;Solyc10g076410.1
GO:0006556	S-adenosylmethionine biosynthetic process	2	2/714	5/10829	6.07	0.0379823	0.771698	Solyc01g101060.4/Solyc12g099000.3	Solyc01g101060.4;Solyc12g099000.3
GO:0006714	sesquiterpenoid metabolic process	2	2/714	5/10829	6.07	0.0379823	0.771698	Solyc04g077860.4/Solyc07g045190.3	Solyc04g077860.4;Solyc07g045190.3
GO:0030041	actin filament polymerization	2	2/714	5/10829	6.07	0.0379823	0.771698	Solyc09g090550.3/Solyc12g098430.2	Solyc09g090550.3;Solyc12g098430.2
GO:0060236	regulation of mitotic spindle organization	3	3/714	12/10829	3.79	0.0401263	0.771698	Solyc02g067100.3/Solyc07g053790.2/Solyc10g008210.3	Solyc02g067100.3;Solyc07g053790.2;Solyc10g008210.3
GO:0044092	negative regulation of molecular function	7	7/714	49/10829	2.17	0.0403217	0.771698	Solyc02g078030.3/Solyc03g095780.3/Solyc07g065090.2/Solyc08g082180.3/Solyc09g011030.3/Solyc09g014480.3/Solyc10g076410.1	Solyc02g078030.3;Solyc03g095780.3;Solyc07g065090.2;Solyc08g082180.3;Solyc09g011030.3;Solyc09g014480.3;Solyc10g076410.1
GO:0009651	response to salt stress	10	10/714	82/10829	1.85	0.042561	0.771698	Solyc02g077780.3/Solyc02g093940.3/Solyc04g076210.3/Solyc05g008640.1/Solyc06g084320.1/Solyc07g045190.3/Solyc08g068150.4/Solyc08g080670.1/Solyc08g082180.3/Solyc09g064820.1	Solyc02g077780.3;Solyc02g093940.3;Solyc04g076210.3;Solyc05g008640.1;Solyc06g084320.1;Solyc07g045190.3;Solyc08g068150.4;Solyc08g080670.1;Solyc08g082180.3;Solyc09g064820.1
GO:0071215	cellular response to abscisic acid stimulus	5	5/714	30/10829	2.53	0.0443845	0.771698	Solyc03g095780.3/Solyc06g084320.1/Solyc08g082180.3/Solyc09g064820.1/Solyc10g076410.1	Solyc03g095780.3;Solyc06g084320.1;Solyc08g082180.3;Solyc09g064820.1;Solyc10g076410.1
GO:0006596	polyamine biosynthetic process	3	3/714	13/10829	3.5	0.0496766	0.771698	Solyc03g007240.3/Solyc03g098300.1/Solyc04g082030.1	Solyc03g007240.3;Solyc03g098300.1;Solyc04g082030.1
GO:0034293	sexual sporulation	3	3/714	13/10829	3.5	0.0496766	0.771698	Solyc01g044558.1/Solyc01g107250.3/Solyc06g075640.2	Solyc01g044558.1;Solyc01g107250.3;Solyc06g075640.2
GO:0043455	regulation of secondary metabolic process	3	3/714	13/10829	3.5	0.0496766	0.771698	Solyc03g120320.1/Solyc07g063850.3/Solyc09g091600.4	Solyc03g120320.1;Solyc07g063850.3;Solyc09g091600.4
GO:0006597	spermine biosynthetic process	2	2/714	6/10829	5.06	0.0545184	0.771698	Solyc03g007240.3/Solyc05g010420.2	Solyc03g007240.3;Solyc05g010420.2
GO:0045490	pectin catabolic process	10	10/714	86/10829	1.76	0.0558795	0.771698	Solyc01g098930.3/Solyc02g075620.4/Solyc02g080220.3/Solyc02g087670.3/Solyc03g058890.4/Solyc03g058910.3/Solyc06g034360.2/Solyc07g043240.4/Solyc08g078640.3/Solyc09g008380.3	Solyc01g098930.3;Solyc02g075620.4;Solyc02g080220.3;Solyc02g087670.3;Solyc03g058890.4;Solyc03g058910.3;Solyc06g034360.2;Solyc07g043240.4;Solyc08g078640.3;Solyc09g008380.3
GO:0097306	cellular response to alcohol	5	5/714	32/10829	2.37	0.0563615	0.771698	Solyc03g095780.3/Solyc06g084320.1/Solyc08g082180.3/Solyc09g064820.1/Solyc10g076410.1	Solyc03g095780.3;Solyc06g084320.1;Solyc08g082180.3;Solyc09g064820.1;Solyc10g076410.1
GO:0032515	negative regulation of phosphoprotein phosphatase activity	3	3/714	14/10829	3.25	0.0602214	0.771698	Solyc03g095780.3/Solyc08g082180.3/Solyc10g076410.1	Solyc03g095780.3;Solyc08g082180.3;Solyc10g076410.1
GO:0035308	negative regulation of protein dephosphorylation	3	3/714	14/10829	3.25	0.0602214	0.771698	Solyc03g095780.3/Solyc08g082180.3/Solyc10g076410.1	Solyc03g095780.3;Solyc08g082180.3;Solyc10g076410.1
GO:0042255	ribosome assembly	3	3/714	14/10829	3.25	0.0602214	0.771698	Solyc04g016380.3/Solyc10g078660.2/Solyc10g083740.3	Solyc04g016380.3;Solyc10g078660.2;Solyc10g083740.3
GO:0000027	ribosomal large subunit assembly	4	4/714	23/10829	2.64	0.0609958	0.771698	Solyc01g104590.3/Solyc04g016380.3/Solyc10g078660.2/Solyc10g083740.3	Solyc01g104590.3;Solyc04g016380.3;Solyc10g078660.2;Solyc10g083740.3
GO:0001523	retinoid metabolic process	1	1/714	1/10829	15.17	0.0659341	0.771698	Solyc03g098460.3	Solyc03g098460.3
GO:0006210	thymine catabolic process	1	1/714	1/10829	15.17	0.0659341	0.771698	Solyc03g097910.4	Solyc03g097910.4
GO:0006212	uracil catabolic process	1	1/714	1/10829	15.17	0.0659341	0.771698	Solyc03g097910.4	Solyc03g097910.4
GO:0006273	lagging strand elongation	1	1/714	1/10829	15.17	0.0659341	0.771698	Solyc02g093300.3	Solyc02g093300.3
GO:0006490	oligosaccharide-lipid intermediate biosynthetic process	1	1/714	1/10829	15.17	0.0659341	0.771698	Solyc01g088650.4	Solyc01g088650.4
GO:0006525	arginine metabolic process	1	1/714	1/10829	15.17	0.0659341	0.771698	Solyc08g080370.3	Solyc08g080370.3
GO:0006855	drug transmembrane transport	1	1/714	1/10829	15.17	0.0659341	0.771698	Solyc04g009790.4	Solyc04g009790.4
GO:0009240	isopentenyl diphosphate biosynthetic process	1	1/714	1/10829	15.17	0.0659341	0.771698	Solyc05g055760.3	Solyc05g055760.3
GO:0009625	response to insect	1	1/714	1/10829	15.17	0.0659341	0.771698	Solyc07g040690.3	Solyc07g040690.3
GO:0009862	systemic acquired resistance, salicylic acid mediated signaling pathway	1	1/714	1/10829	15.17	0.0659341	0.771698	Solyc07g040690.3	Solyc07g040690.3
GO:0009870	defense response signaling pathway, resistance gene-dependent	1	1/714	1/10829	15.17	0.0659341	0.771698	Solyc11g005720.1	Solyc11g005720.1
GO:0010024	phytochromobilin biosynthetic process	1	1/714	1/10829	15.17	0.0659341	0.771698	Solyc01g008930.4	Solyc01g008930.4
GO:0010185	regulation of cellular defense response	1	1/714	1/10829	15.17	0.0659341	0.771698	Solyc02g078030.3	Solyc02g078030.3
GO:0010482	regulation of epidermal cell division	1	1/714	1/10829	15.17	0.0659341	0.771698	Solyc11g010440.3	Solyc11g010440.3
GO:0010869	regulation of receptor biosynthetic process	1	1/714	1/10829	15.17	0.0659341	0.771698	Solyc02g080610.4	Solyc02g080610.4
GO:0015671	oxygen transport	1	1/714	1/10829	15.17	0.0659341	0.771698	Solyc08g068070.3	Solyc08g068070.3
GO:0015849	organic acid transport	1	1/714	1/10829	15.17	0.0659341	0.771698	Solyc01g060070.3	Solyc01g060070.3
GO:0019277	UDP-N-acetylgalactosamine biosynthetic process	1	1/714	1/10829	15.17	0.0659341	0.771698	Solyc07g062543.1	Solyc07g062543.1
GO:0019751	polyol metabolic process	1	1/714	1/10829	15.17	0.0659341	0.771698	Solyc11g069780.3	Solyc11g069780.3
GO:0032055	negative regulation of translation in response to stress	1	1/714	1/10829	15.17	0.0659341	0.771698	Solyc10g086570.3	Solyc10g086570.3
GO:0032780	negative regulation of ATPase activity	1	1/714	1/10829	15.17	0.0659341	0.771698	Solyc05g055250.2	Solyc05g055250.2
GO:0033517	myo-inositol hexakisphosphate metabolic process	1	1/714	1/10829	15.17	0.0659341	0.771698	Solyc11g069780.3	Solyc11g069780.3
GO:0033540	fatty acid beta-oxidation using acyl-CoA oxidase	1	1/714	1/10829	15.17	0.0659341	0.771698	Solyc08g078390.4	Solyc08g078390.4
GO:0033567	DNA replication, Okazaki fragment processing	1	1/714	1/10829	15.17	0.0659341	0.771698	Solyc01g088380.3	Solyc01g088380.3
GO:0034308	primary alcohol metabolic process	1	1/714	1/10829	15.17	0.0659341	0.771698	Solyc03g098460.3	Solyc03g098460.3
GO:0035437	maintenance of protein localization in endoplasmic reticulum	1	1/714	1/10829	15.17	0.0659341	0.771698	Solyc02g080610.4	Solyc02g080610.4
GO:0042572	retinol metabolic process	1	1/714	1/10829	15.17	0.0659341	0.771698	Solyc03g098460.3	Solyc03g098460.3
GO:0042574	retinal metabolic process	1	1/714	1/10829	15.17	0.0659341	0.771698	Solyc03g098460.3	Solyc03g098460.3
GO:0043647	inositol phosphate metabolic process	1	1/714	1/10829	15.17	0.0659341	0.771698	Solyc11g069780.3	Solyc11g069780.3
GO:0044571	[2Fe-2S] cluster assembly	1	1/714	1/10829	15.17	0.0659341	0.771698	Solyc02g091900.4	Solyc02g091900.4
GO:0045337	farnesyl diphosphate biosynthetic process	1	1/714	1/10829	15.17	0.0659341	0.771698	Solyc12g015860.2	Solyc12g015860.2
GO:0046173	polyol biosynthetic process	1	1/714	1/10829	15.17	0.0659341	0.771698	Solyc11g069780.3	Solyc11g069780.3
GO:0046398	UDP-glucuronate metabolic process	1	1/714	1/10829	15.17	0.0659341	0.771698	Solyc04g058070.3	Solyc04g058070.3
GO:0046942	carboxylic acid transport	1	1/714	1/10829	15.17	0.0659341	0.771698	Solyc01g060070.3	Solyc01g060070.3
GO:0051245	negative regulation of cellular defense response	1	1/714	1/10829	15.17	0.0659341	0.771698	Solyc02g078030.3	Solyc02g078030.3
GO:0051567	histone H3-K9 methylation	1	1/714	1/10829	15.17	0.0659341	0.771698	Solyc11g010440.3	Solyc11g010440.3
GO:0052573	UDP-D-galactose metabolic process	1	1/714	1/10829	15.17	0.0659341	0.771698	Solyc04g058070.3	Solyc04g058070.3
GO:0060359	response to ammonium ion	1	1/714	1/10829	15.17	0.0659341	0.771698	Solyc04g082390.3	Solyc04g082390.3
GO:0061647	histone H3-K9 modification	1	1/714	1/10829	15.17	0.0659341	0.771698	Solyc11g010440.3	Solyc11g010440.3
GO:0071629	ubiquitin-dependent catabolism of misfolded proteins by cytoplasm-associated proteasome	1	1/714	1/10829	15.17	0.0659341	0.771698	Solyc05g007895.1	Solyc05g007895.1
GO:1902347	response to strigolactone	1	1/714	1/10829	15.17	0.0659341	0.771698	Solyc04g077860.4	Solyc04g077860.4
GO:1902348	cellular response to strigolactone	1	1/714	1/10829	15.17	0.0659341	0.771698	Solyc04g077860.4	Solyc04g077860.4
GO:1902975	mitotic DNA replication initiation	1	1/714	1/10829	15.17	0.0659341	0.771698	Solyc02g093300.3	Solyc02g093300.3
GO:1903825	organic acid transmembrane transport	1	1/714	1/10829	15.17	0.0659341	0.771698	Solyc01g060070.3	Solyc01g060070.3
GO:1905039	carboxylic acid transmembrane transport	1	1/714	1/10829	15.17	0.0659341	0.771698	Solyc01g060070.3	Solyc01g060070.3
GO:1905775	negative regulation of DNA helicase activity	1	1/714	1/10829	15.17	0.0659341	0.771698	Solyc11g040120.3	Solyc11g040120.3
GO:0032147	activation of protein kinase activity	4	4/714	24/10829	2.53	0.069536	0.782208	Solyc02g067100.3/Solyc03g097920.1/Solyc07g053790.2/Solyc10g008210.3	Solyc02g067100.3;Solyc03g097920.1;Solyc07g053790.2;Solyc10g008210.3
GO:0010923	negative regulation of phosphatase activity	3	3/714	15/10829	3.03	0.0717149	0.782208	Solyc03g095780.3/Solyc08g082180.3/Solyc10g076410.1	Solyc03g095780.3;Solyc08g082180.3;Solyc10g076410.1
GO:0035305	negative regulation of dephosphorylation	3	3/714	15/10829	3.03	0.0717149	0.782208	Solyc03g095780.3/Solyc08g082180.3/Solyc10g076410.1	Solyc03g095780.3;Solyc08g082180.3;Solyc10g076410.1
GO:0043934	sporulation	3	3/714	15/10829	3.03	0.0717149	0.782208	Solyc01g044558.1/Solyc01g107250.3/Solyc06g075640.2	Solyc01g044558.1;Solyc01g107250.3;Solyc06g075640.2
GO:0000103	sulfate assimilation	2	2/714	7/10829	4.33	0.0730564	0.782208	Solyc02g064650.3/Solyc10g080680.3	Solyc02g064650.3;Solyc10g080680.3
GO:0006777	Mo-molybdopterin cofactor biosynthetic process	2	2/714	7/10829	4.33	0.0730564	0.782208	Solyc05g050570.3/Solyc07g066480.3	Solyc05g050570.3;Solyc07g066480.3
GO:0019509	L-methionine salvage from methylthioadenosine	2	2/714	7/10829	4.33	0.0730564	0.782208	Solyc07g063040.3/Solyc09g082650.4	Solyc07g063040.3;Solyc09g082650.4
GO:0045893	positive regulation of transcription, DNA-templated	9	9/714	80/10829	1.71	0.079668	0.782208	Solyc01g091420.2/Solyc03g033660.4/Solyc04g015360.3/Solyc05g056120.3/Solyc07g040690.3/Solyc07g063350.3/Solyc10g076920.3/Solyc11g017470.2/Solyc11g044560.3	Solyc01g091420.2;Solyc03g033660.4;Solyc04g015360.3;Solyc05g056120.3;Solyc07g040690.3;Solyc07g063350.3;Solyc10g076920.3;Solyc11g017470.2;Solyc11g044560.3
GO:1901701	cellular response to oxygen-containing compound	10	10/714	92/10829	1.65	0.0805388	0.782208	Solyc01g107250.3/Solyc03g095780.3/Solyc03g118540.4/Solyc04g077860.4/Solyc05g009170.3/Solyc06g084320.1/Solyc08g082180.3/Solyc09g064820.1/Solyc09g065870.4/Solyc10g076410.1	Solyc01g107250.3;Solyc03g095780.3;Solyc03g118540.4;Solyc04g077860.4;Solyc05g009170.3;Solyc06g084320.1;Solyc08g082180.3;Solyc09g064820.1;Solyc09g065870.4;Solyc10g076410.1
GO:0006720	isoprenoid metabolic process	3	3/714	16/10829	2.84	0.0841047	0.782208	Solyc03g098460.3/Solyc04g077860.4/Solyc07g045190.3	Solyc03g098460.3;Solyc04g077860.4;Solyc07g045190.3
GO:0006721	terpenoid metabolic process	3	3/714	16/10829	2.84	0.0841047	0.782208	Solyc03g098460.3/Solyc04g077860.4/Solyc07g045190.3	Solyc03g098460.3;Solyc04g077860.4;Solyc07g045190.3
GO:0009630	gravitropism	3	3/714	16/10829	2.84	0.0841047	0.782208	Solyc02g092480.4/Solyc03g044090.4/Solyc03g112920.1	Solyc02g092480.4;Solyc03g044090.4;Solyc03g112920.1
GO:1901615	organic hydroxy compound metabolic process	3	3/714	16/10829	2.84	0.0841047	0.782208	Solyc03g098460.3/Solyc07g045190.3/Solyc11g069780.3	Solyc03g098460.3;Solyc07g045190.3;Solyc11g069780.3
GO:0071310	cellular response to organic substance	14	14/714	142/10829	1.5	0.0849564	0.782208	Solyc01g044556.1/Solyc01g107250.3/Solyc03g095780.3/Solyc03g118540.4/Solyc04g077860.4/Solyc05g007895.1/Solyc05g009170.3/Solyc06g084320.1/Solyc07g063850.3/Solyc08g082180.3/Solyc09g064820.1/Solyc09g065870.4/Solyc10g076410.1/Solyc10g083740.3	Solyc01g044556.1;Solyc01g107250.3;Solyc03g095780.3;Solyc03g118540.4;Solyc04g077860.4;Solyc05g007895.1;Solyc05g009170.3;Solyc06g084320.1;Solyc07g063850.3;Solyc08g082180.3;Solyc09g064820.1;Solyc09g065870.4;Solyc10g076410.1;Solyc10g083740.3
GO:0016998	cell wall macromolecule catabolic process	4	4/714	26/10829	2.33	0.0883362	0.782208	Solyc02g061770.4/Solyc06g053380.3/Solyc12g013750.2/Solyc12g098810.2	Solyc02g061770.4;Solyc06g053380.3;Solyc12g013750.2;Solyc12g098810.2
GO:0019748	secondary metabolic process	7	7/714	59/10829	1.8	0.0918322	0.782208	Solyc05g009170.3/Solyc07g056490.4/Solyc07g063850.3/Solyc08g080900.3/Solyc09g011590.4/Solyc09g011650.4/Solyc10g052510.2	Solyc05g009170.3;Solyc07g056490.4;Solyc07g063850.3;Solyc08g080900.3;Solyc09g011590.4;Solyc09g011650.4;Solyc10g052510.2
GO:0071555	cell wall organization	17	17/714	182/10829	1.42	0.0920668	0.782208	Solyc01g081060.4/Solyc01g088790.2/Solyc01g095290.4/Solyc03g031800.3/Solyc03g098430.4/Solyc03g115830.2/Solyc03g116590.3/Solyc03g117750.3/Solyc04g008210.2/Solyc04g080080.3/Solyc05g005170.4/Solyc07g065660.4/Solyc08g005800.4/Solyc08g060970.4/Solyc12g015770.3/Solyc12g017240.2/Solyc12g098603.1	Solyc01g081060.4;Solyc01g088790.2;Solyc01g095290.4;Solyc03g031800.3;Solyc03g098430.4;Solyc03g115830.2;Solyc03g116590.3;Solyc03g117750.3;Solyc04g008210.2;Solyc04g080080.3;Solyc05g005170.4;Solyc07g065660.4;Solyc08g005800.4;Solyc08g060970.4;Solyc12g015770.3;Solyc12g017240.2;Solyc12g098603.1
GO:0006778	porphyrin-containing compound metabolic process	2	2/714	8/10829	3.79	0.0932612	0.782208	Solyc07g063350.3/Solyc12g005300.2	Solyc07g063350.3;Solyc12g005300.2
GO:0009958	positive gravitropism	2	2/714	8/10829	3.79	0.0932612	0.782208	Solyc02g092480.4/Solyc03g044090.4	Solyc02g092480.4;Solyc03g044090.4
GO:0015994	chlorophyll metabolic process	2	2/714	8/10829	3.79	0.0932612	0.782208	Solyc07g063350.3/Solyc12g005300.2	Solyc07g063350.3;Solyc12g005300.2
GO:0032957	inositol trisphosphate metabolic process	2	2/714	8/10829	3.79	0.0932612	0.782208	Solyc08g005130.1/Solyc08g015630.3	Solyc08g005130.1;Solyc08g015630.3
GO:0071229	cellular response to acid chemical	8	8/714	71/10829	1.71	0.0943616	0.782208	Solyc03g095780.3/Solyc03g118540.4/Solyc05g009170.3/Solyc06g084320.1/Solyc08g082180.3/Solyc09g064820.1/Solyc09g065870.4/Solyc10g076410.1	Solyc03g095780.3;Solyc03g118540.4;Solyc05g009170.3;Solyc06g084320.1;Solyc08g082180.3;Solyc09g064820.1;Solyc09g065870.4;Solyc10g076410.1
GO:0006032	chitin catabolic process	4	4/714	27/10829	2.25	0.0985611	0.782208	Solyc01g095670.4/Solyc02g061770.4/Solyc06g053380.3/Solyc12g098810.2	Solyc01g095670.4;Solyc02g061770.4;Solyc06g053380.3;Solyc12g098810.2
GO:0046686	response to cadmium ion	6	6/714	49/10829	1.86	0.101385	0.782208	Solyc03g119980.3/Solyc04g058070.3/Solyc09g011590.4/Solyc09g011650.4/Solyc09g098090.4/Solyc10g052510.2	Solyc03g119980.3;Solyc04g058070.3;Solyc09g011590.4;Solyc09g011650.4;Solyc09g098090.4;Solyc10g052510.2
GO:0033993	response to lipid	12	12/714	123/10829	1.48	0.111316	0.782208	Solyc01g005400.3/Solyc01g107250.3/Solyc03g095780.3/Solyc04g077860.4/Solyc05g009170.3/Solyc06g084320.1/Solyc07g045190.3/Solyc08g082180.3/Solyc09g011590.4/Solyc09g011650.4/Solyc09g064820.1/Solyc10g076410.1	Solyc01g005400.3;Solyc01g107250.3;Solyc03g095780.3;Solyc04g077860.4;Solyc05g009170.3;Solyc06g084320.1;Solyc07g045190.3;Solyc08g082180.3;Solyc09g011590.4;Solyc09g011650.4;Solyc09g064820.1;Solyc10g076410.1
GO:0010921	regulation of phosphatase activity	3	3/714	18/10829	2.53	0.11134	0.782208	Solyc03g095780.3/Solyc08g082180.3/Solyc10g076410.1	Solyc03g095780.3;Solyc08g082180.3;Solyc10g076410.1
GO:0009555	pollen development	7	7/714	62/10829	1.71	0.112245	0.782208	Solyc01g044558.1/Solyc01g086690.2/Solyc01g107250.3/Solyc04g058070.3/Solyc06g073890.3/Solyc06g075640.2/Solyc07g005800.2	Solyc01g044558.1;Solyc01g086690.2;Solyc01g107250.3;Solyc04g058070.3;Solyc06g073890.3;Solyc06g075640.2;Solyc07g005800.2
GO:0009611	response to wounding	9	9/714	86/10829	1.59	0.112467	0.782208	Solanum_lycopersicum_newGene_1975/Solyc03g006550.4/Solyc03g118540.4/Solyc06g069400.4/Solyc07g040690.3/Solyc09g065870.4/Solyc09g089500.3/Solyc09g089520.4/Solyc12g049400.2	--;Solyc03g006550.4;Solyc03g118540.4;Solyc06g069400.4;Solyc07g040690.3;Solyc09g065870.4;Solyc09g089500.3;Solyc09g089520.4;Solyc12g049400.2
GO:0033013	tetrapyrrole metabolic process	2	2/714	9/10829	3.37	0.114833	0.782208	Solyc07g063350.3/Solyc12g005300.2	Solyc07g063350.3;Solyc12g005300.2
GO:0045017	glycerolipid biosynthetic process	2	2/714	9/10829	3.37	0.114833	0.782208	Solyc01g107900.3/Solyc10g009430.3	Solyc01g107900.3;Solyc10g009430.3
GO:1900376	regulation of secondary metabolite biosynthetic process	2	2/714	9/10829	3.37	0.114833	0.782208	Solyc07g063850.3/Solyc09g091600.4	Solyc07g063850.3;Solyc09g091600.4
GO:2000032	regulation of secondary shoot formation	2	2/714	9/10829	3.37	0.114833	0.782208	Solyc02g077250.2/Solyc03g123400.1	Solyc02g077250.2;Solyc03g123400.1
GO:0009753	response to jasmonic acid	5	5/714	40/10829	1.9	0.120696	0.782208	Solyc03g006550.4/Solyc03g095780.3/Solyc03g118540.4/Solyc09g065870.4/Solyc12g049400.2	Solyc03g006550.4;Solyc03g095780.3;Solyc03g118540.4;Solyc09g065870.4;Solyc12g049400.2
GO:0035304	regulation of protein dephosphorylation	3	3/714	19/10829	2.39	0.126061	0.782208	Solyc03g095780.3/Solyc08g082180.3/Solyc10g076410.1	Solyc03g095780.3;Solyc08g082180.3;Solyc10g076410.1
GO:0071395	cellular response to jasmonic acid stimulus	3	3/714	19/10829	2.39	0.126061	0.782208	Solyc03g095780.3/Solyc03g118540.4/Solyc09g065870.4	Solyc03g095780.3;Solyc03g118540.4;Solyc09g065870.4
GO:2000022	regulation of jasmonic acid mediated signaling pathway	3	3/714	19/10829	2.39	0.126061	0.782208	Solyc03g118540.4/Solyc07g040690.3/Solyc12g049400.2	Solyc03g118540.4;Solyc07g040690.3;Solyc12g049400.2
GO:0000212	meiotic spindle organization	1	1/714	2/10829	7.58	0.127527	0.782208	Solyc07g005800.2	Solyc07g005800.2
GO:0006022	aminoglycan metabolic process	1	1/714	2/10829	7.58	0.127527	0.782208	Solyc01g095670.4	Solyc01g095670.4
GO:0006026	aminoglycan catabolic process	1	1/714	2/10829	7.58	0.127527	0.782208	Solyc01g095670.4	Solyc01g095670.4
GO:0006030	chitin metabolic process	1	1/714	2/10829	7.58	0.127527	0.782208	Solyc01g095670.4	Solyc01g095670.4
GO:0006040	amino sugar metabolic process	1	1/714	2/10829	7.58	0.127527	0.782208	Solyc01g095670.4	Solyc01g095670.4
GO:0006272	leading strand elongation	1	1/714	2/10829	7.58	0.127527	0.782208	Solyc02g093300.3	Solyc02g093300.3
GO:0006562	proline catabolic process	1	1/714	2/10829	7.58	0.127527	0.782208	Solyc02g089620.3	Solyc02g089620.3
GO:0006654	phosphatidic acid biosynthetic process	1	1/714	2/10829	7.58	0.127527	0.782208	Solyc01g100020.4	Solyc01g100020.4
GO:0006772	thiamine metabolic process	1	1/714	2/10829	7.58	0.127527	0.782208	Solyc09g074970.3	Solyc09g074970.3
GO:0006851	mitochondrial calcium ion transmembrane transport	1	1/714	2/10829	7.58	0.127527	0.782208	Solyc06g018050.4	Solyc06g018050.4
GO:0009229	thiamine diphosphate biosynthetic process	1	1/714	2/10829	7.58	0.127527	0.782208	Solyc09g074970.3	Solyc09g074970.3
GO:0009270	response to humidity	1	1/714	2/10829	7.58	0.127527	0.782208	Solyc03g118200.4	Solyc03g118200.4
GO:0009695	jasmonic acid biosynthetic process	1	1/714	2/10829	7.58	0.127527	0.782208	Solyc02g085730.3	Solyc02g085730.3
GO:0009700	indole phytoalexin biosynthetic process	1	1/714	2/10829	7.58	0.127527	0.782208	Solyc07g063850.3	Solyc07g063850.3
GO:0010120	camalexin biosynthetic process	1	1/714	2/10829	7.58	0.127527	0.782208	Solyc07g063850.3	Solyc07g063850.3
GO:0010206	photosystem II repair	1	1/714	2/10829	7.58	0.127527	0.782208	Solyc12g009600.2	Solyc12g009600.2
GO:0010337	regulation of salicylic acid metabolic process	1	1/714	2/10829	7.58	0.127527	0.782208	Solyc02g077780.3	Solyc02g077780.3
GO:0010412	mannan metabolic process	1	1/714	2/10829	7.58	0.127527	0.782208	Solyc12g013750.2	Solyc12g013750.2
GO:0019284	L-methionine salvage from S-adenosylmethionine	1	1/714	2/10829	7.58	0.127527	0.782208	Solyc07g063040.3	Solyc07g063040.3
GO:0019673	GDP-mannose metabolic process	1	1/714	2/10829	7.58	0.127527	0.782208	Solyc03g118270.1	Solyc03g118270.1
GO:0033356	UDP-L-arabinose metabolic process	1	1/714	2/10829	7.58	0.127527	0.782208	Solyc04g058070.3	Solyc04g058070.3
GO:0042276	error-prone translesion synthesis	1	1/714	2/10829	7.58	0.127527	0.782208	Solyc01g107510.3	Solyc01g107510.3
GO:0044247	cellular polysaccharide catabolic process	1	1/714	2/10829	7.58	0.127527	0.782208	Solyc12g013750.2	Solyc12g013750.2
GO:0044275	cellular carbohydrate catabolic process	1	1/714	2/10829	7.58	0.127527	0.782208	Solyc12g013750.2	Solyc12g013750.2
GO:0045921	positive regulation of exocytosis	1	1/714	2/10829	7.58	0.127527	0.782208	Solyc02g082690.3	Solyc02g082690.3
GO:0046217	indole phytoalexin metabolic process	1	1/714	2/10829	7.58	0.127527	0.782208	Solyc07g063850.3	Solyc07g063850.3
GO:0046348	amino sugar catabolic process	1	1/714	2/10829	7.58	0.127527	0.782208	Solyc01g095670.4	Solyc01g095670.4
GO:0046355	mannan catabolic process	1	1/714	2/10829	7.58	0.127527	0.782208	Solyc12g013750.2	Solyc12g013750.2
GO:0048017	inositol lipid-mediated signaling	1	1/714	2/10829	7.58	0.127527	0.782208	Solyc01g100020.4	Solyc01g100020.4
GO:0048208	COPII vesicle coating	1	1/714	2/10829	7.58	0.127527	0.782208	Solyc08g007340.3	Solyc08g007340.3
GO:0052314	phytoalexin metabolic process	1	1/714	2/10829	7.58	0.127527	0.782208	Solyc07g063850.3	Solyc07g063850.3
GO:0052315	phytoalexin biosynthetic process	1	1/714	2/10829	7.58	0.127527	0.782208	Solyc07g063850.3	Solyc07g063850.3
GO:0052317	camalexin metabolic process	1	1/714	2/10829	7.58	0.127527	0.782208	Solyc07g063850.3	Solyc07g063850.3
GO:0052318	regulation of phytoalexin metabolic process	1	1/714	2/10829	7.58	0.127527	0.782208	Solyc07g063850.3	Solyc07g063850.3
GO:0052319	regulation of phytoalexin biosynthetic process	1	1/714	2/10829	7.58	0.127527	0.782208	Solyc07g063850.3	Solyc07g063850.3
GO:0052320	positive regulation of phytoalexin metabolic process	1	1/714	2/10829	7.58	0.127527	0.782208	Solyc07g063850.3	Solyc07g063850.3
GO:0052322	positive regulation of phytoalexin biosynthetic process	1	1/714	2/10829	7.58	0.127527	0.782208	Solyc07g063850.3	Solyc07g063850.3
GO:0055089	fatty acid homeostasis	1	1/714	2/10829	7.58	0.127527	0.782208	Solyc07g032170.3	Solyc07g032170.3
GO:0055090	acylglycerol homeostasis	1	1/714	2/10829	7.58	0.127527	0.782208	Solyc07g032170.3	Solyc07g032170.3
GO:0055091	phospholipid homeostasis	1	1/714	2/10829	7.58	0.127527	0.782208	Solyc07g032170.3	Solyc07g032170.3
GO:0061635	regulation of protein complex stability	1	1/714	2/10829	7.58	0.127527	0.782208	Solyc05g007895.1	Solyc05g007895.1
GO:0070328	triglyceride homeostasis	1	1/714	2/10829	7.58	0.127527	0.782208	Solyc07g032170.3	Solyc07g032170.3
GO:0070814	hydrogen sulfide biosynthetic process	1	1/714	2/10829	7.58	0.127527	0.782208	Solyc10g080680.3	Solyc10g080680.3
GO:0072595	maintenance of protein localization in organelle	1	1/714	2/10829	7.58	0.127527	0.782208	Solyc02g080610.4	Solyc02g080610.4
GO:0090610	bundle sheath cell fate specification	1	1/714	2/10829	7.58	0.127527	0.782208	Solyc07g043330.3	Solyc07g043330.3
GO:0098656	anion transmembrane transport	1	1/714	2/10829	7.58	0.127527	0.782208	Solyc01g060070.3	Solyc01g060070.3
GO:1901071	glucosamine-containing compound metabolic process	1	1/714	2/10829	7.58	0.127527	0.782208	Solyc01g095670.4	Solyc01g095670.4
GO:1901072	glucosamine-containing compound catabolic process	1	1/714	2/10829	7.58	0.127527	0.782208	Solyc01g095670.4	Solyc01g095670.4
GO:1901182	regulation of camalexin biosynthetic process	1	1/714	2/10829	7.58	0.127527	0.782208	Solyc07g063850.3	Solyc07g063850.3
GO:1901183	positive regulation of camalexin biosynthetic process	1	1/714	2/10829	7.58	0.127527	0.782208	Solyc07g063850.3	Solyc07g063850.3
GO:1901600	strigolactone metabolic process	1	1/714	2/10829	7.58	0.127527	0.782208	Solyc04g077860.4	Solyc04g077860.4
GO:1901601	strigolactone biosynthetic process	1	1/714	2/10829	7.58	0.127527	0.782208	Solyc04g077860.4	Solyc04g077860.4
GO:2000209	regulation of anoikis	1	1/714	2/10829	7.58	0.127527	0.782208	Solyc02g080610.4	Solyc02g080610.4
GO:0009404	toxin metabolic process	5	5/714	41/10829	1.85	0.130463	0.789763	Solyc07g056490.4/Solyc07g063850.3/Solyc08g080900.3/Solyc09g011590.4/Solyc09g011650.4	Solyc07g056490.4;Solyc07g063850.3;Solyc08g080900.3;Solyc09g011590.4;Solyc09g011650.4
GO:0006515	misfolded or incompletely synthesized protein catabolic process	2	2/714	10/10829	3.03	0.137504	0.789763	Solyc05g007895.1/Solyc08g077440.3	Solyc05g007895.1;Solyc08g077440.3
GO:0006662	glycerol ether metabolic process	2	2/714	10/10829	3.03	0.137504	0.789763	Solyc05g006830.3/Solyc10g008390.3	Solyc05g006830.3;Solyc10g008390.3
GO:0006004	fucose metabolic process	5	5/714	42/10829	1.81	0.140576	0.789763	Solyc01g086640.2/Solyc02g069240.1/Solyc06g063240.3/Solyc08g078380.3/Solyc11g013270.2	Solyc01g086640.2;Solyc02g069240.1;Solyc06g063240.3;Solyc08g078380.3;Solyc11g013270.2
GO:0005992	trehalose biosynthetic process	3	3/714	20/10829	2.27	0.141432	0.789763	Solyc04g054930.3/Solyc04g072920.4/Solyc08g079060.4	Solyc04g054930.3;Solyc04g072920.4;Solyc08g079060.4
GO:0046856	phosphatidylinositol dephosphorylation	3	3/714	20/10829	2.27	0.141432	0.789763	Solyc04g072035.1/Solyc08g007080.4/Solyc08g077210.4	Solyc04g072035.1;Solyc08g007080.4;Solyc08g077210.4
GO:0009908	flower development	8	8/714	80/10829	1.52	0.155915	0.789763	Solyc01g107250.3/Solyc02g092480.4/Solyc03g006880.3/Solyc03g043770.4/Solyc03g044090.4/Solyc03g063140.4/Solyc04g076210.3/Solyc10g083740.3	Solyc01g107250.3;Solyc02g092480.4;Solyc03g006880.3;Solyc03g043770.4;Solyc03g044090.4;Solyc03g063140.4;Solyc04g076210.3;Solyc10g083740.3
GO:0009867	jasmonic acid mediated signaling pathway	3	3/714	21/10829	2.17	0.157387	0.789763	Solyc03g095780.3/Solyc03g118540.4/Solyc09g065870.4	Solyc03g095780.3;Solyc03g118540.4;Solyc09g065870.4
GO:0043666	regulation of phosphoprotein phosphatase activity	3	3/714	21/10829	2.17	0.157387	0.789763	Solyc03g095780.3/Solyc08g082180.3/Solyc10g076410.1	Solyc03g095780.3;Solyc08g082180.3;Solyc10g076410.1
GO:0071826	ribonucleoprotein complex subunit organization	3	3/714	21/10829	2.17	0.157387	0.789763	Solyc04g016380.3/Solyc10g078660.2/Solyc10g083740.3	Solyc04g016380.3;Solyc10g078660.2;Solyc10g083740.3
GO:0000272	polysaccharide catabolic process	2	2/714	11/10829	2.76	0.161037	0.789763	Solyc08g077530.3/Solyc12g013750.2	Solyc08g077530.3;Solyc12g013750.2
GO:0006730	one-carbon metabolic process	2	2/714	11/10829	2.76	0.161037	0.789763	Solyc01g101060.4/Solyc12g099000.3	Solyc01g101060.4;Solyc12g099000.3
GO:0009629	response to gravity	2	2/714	11/10829	2.76	0.161037	0.789763	Solyc02g092480.4/Solyc03g044090.4	Solyc02g092480.4;Solyc03g044090.4
GO:0009813	flavonoid biosynthetic process	2	2/714	11/10829	2.76	0.161037	0.789763	Solyc01g087050.3/Solyc07g063350.3	Solyc01g087050.3;Solyc07g063350.3
GO:0042762	regulation of sulfur metabolic process	2	2/714	11/10829	2.76	0.161037	0.789763	Solyc07g063850.3/Solyc09g091600.4	Solyc07g063850.3;Solyc09g091600.4
GO:0046855	inositol phosphate dephosphorylation	2	2/714	11/10829	2.76	0.161037	0.789763	Solyc02g079250.4/Solyc11g012410.2	Solyc02g079250.4;Solyc11g012410.2
GO:0047484	regulation of response to osmotic stress	2	2/714	11/10829	2.76	0.161037	0.789763	Solyc05g008640.1/Solyc07g045190.3	Solyc05g008640.1;Solyc07g045190.3
GO:0006869	lipid transport	8	8/714	81/10829	1.5	0.163722	0.789763	Solyc06g072110.4/Solyc06g084190.3/Solyc08g067530.1/Solyc09g007860.4/Solyc10g075090.3/Solyc10g075103.1/Solyc10g075110.2/Solyc12g011420.2	Solyc06g072110.4;Solyc06g084190.3;Solyc08g067530.1;Solyc09g007860.4;Solyc10g075090.3;Solyc10g075103.1;Solyc10g075110.2;Solyc12g011420.2
GO:0048367	shoot system development	10	10/714	107/10829	1.42	0.167138	0.789763	Solyc01g107250.3/Solyc02g092480.4/Solyc03g043770.4/Solyc03g044090.4/Solyc03g063140.4/Solyc03g112750.4/Solyc04g077860.4/Solyc06g050760.1/Solyc07g043330.3/Solyc10g083740.3	Solyc01g107250.3;Solyc02g092480.4;Solyc03g043770.4;Solyc03g044090.4;Solyc03g063140.4;Solyc03g112750.4;Solyc04g077860.4;Solyc06g050760.1;Solyc07g043330.3;Solyc10g083740.3
GO:0010035	response to inorganic substance	13	13/714	147/10829	1.34	0.171685	0.789763	Solyc01g005400.3/Solyc03g116390.4/Solyc03g118200.4/Solyc03g119980.3/Solyc04g056320.3/Solyc06g050760.1/Solyc06g084320.1/Solyc08g082180.3/Solyc09g011590.4/Solyc09g011650.4/Solyc09g064820.1/Solyc09g098090.4/Solyc10g052510.2	Solyc01g005400.3;Solyc03g116390.4;Solyc03g118200.4;Solyc03g119980.3;Solyc04g056320.3;Solyc06g050760.1;Solyc06g084320.1;Solyc08g082180.3;Solyc09g011590.4;Solyc09g011650.4;Solyc09g064820.1;Solyc09g098090.4;Solyc10g052510.2
GO:0009627	systemic acquired resistance	3	3/714	22/10829	2.07	0.173862	0.789763	Solyc01g066910.3/Solyc03g121900.1/Solyc07g065110.1	Solyc01g066910.3;Solyc03g121900.1;Solyc07g065110.1
GO:0010563	negative regulation of phosphorus metabolic process	3	3/714	22/10829	2.07	0.173862	0.789763	Solyc03g095780.3/Solyc08g082180.3/Solyc10g076410.1	Solyc03g095780.3;Solyc08g082180.3;Solyc10g076410.1
GO:0022618	ribonucleoprotein complex assembly	3	3/714	22/10829	2.07	0.173862	0.789763	Solyc04g016380.3/Solyc10g078660.2/Solyc10g083740.3	Solyc04g016380.3;Solyc10g078660.2;Solyc10g083740.3
GO:0035303	regulation of dephosphorylation	3	3/714	22/10829	2.07	0.173862	0.789763	Solyc03g095780.3/Solyc08g082180.3/Solyc10g076410.1	Solyc03g095780.3;Solyc08g082180.3;Solyc10g076410.1
GO:0045936	negative regulation of phosphate metabolic process	3	3/714	22/10829	2.07	0.173862	0.789763	Solyc03g095780.3/Solyc08g082180.3/Solyc10g076410.1	Solyc03g095780.3;Solyc08g082180.3;Solyc10g076410.1
GO:0051260	protein homooligomerization	3	3/714	22/10829	2.07	0.173862	0.789763	Solyc02g078410.1/Solyc07g005520.1/Solyc08g081230.1	Solyc02g078410.1;Solyc07g005520.1;Solyc08g081230.1
GO:0001676	long-chain fatty acid metabolic process	1	1/714	3/10829	5.06	0.185063	0.789763	Solyc08g078390.4	Solyc08g078390.4
GO:0006011	UDP-glucose metabolic process	1	1/714	3/10829	5.06	0.185063	0.789763	Solyc04g058070.3	Solyc04g058070.3
GO:0006226	dUMP biosynthetic process	1	1/714	3/10829	5.06	0.185063	0.789763	Solyc01g097970.4	Solyc01g097970.4
GO:0006285	base-excision repair, AP site formation	1	1/714	3/10829	5.06	0.185063	0.789763	Solyc09g083007.1	Solyc09g083007.1
GO:0006430	lysyl-tRNA aminoacylation	1	1/714	3/10829	5.06	0.185063	0.789763	Solyc01g005540.4	Solyc01g005540.4
GO:0006571	tyrosine biosynthetic process	1	1/714	3/10829	5.06	0.185063	0.789763	Solyc09g011870.3	Solyc09g011870.3
GO:0006637	acyl-CoA metabolic process	1	1/714	3/10829	5.06	0.185063	0.789763	Solyc01g094530.4	Solyc01g094530.4
GO:0006680	glucosylceramide catabolic process	1	1/714	3/10829	5.06	0.185063	0.789763	Solyc11g042460.2	Solyc11g042460.2
GO:0006787	porphyrin-containing compound catabolic process	1	1/714	3/10829	5.06	0.185063	0.789763	Solyc12g005300.2	Solyc12g005300.2
GO:0006825	copper ion transport	1	1/714	3/10829	5.06	0.185063	0.789763	Solyc07g063160.2	Solyc07g063160.2
GO:0007135	meiosis II	1	1/714	3/10829	5.06	0.185063	0.789763	Solyc01g044558.1	Solyc01g044558.1
GO:0007167	enzyme linked receptor protein signaling pathway	1	1/714	3/10829	5.06	0.185063	0.789763	Solyc01g107250.3	Solyc01g107250.3
GO:0007178	transmembrane receptor protein serine/threonine kinase signaling pathway	1	1/714	3/10829	5.06	0.185063	0.789763	Solyc01g107250.3	Solyc01g107250.3
GO:0009226	nucleotide-sugar biosynthetic process	1	1/714	3/10829	5.06	0.185063	0.789763	Solyc04g058070.3	Solyc04g058070.3
GO:0009687	abscisic acid metabolic process	1	1/714	3/10829	5.06	0.185063	0.789763	Solyc07g045190.3	Solyc07g045190.3
GO:0009806	lignan metabolic process	1	1/714	3/10829	5.06	0.185063	0.789763	Solyc10g052510.2	Solyc10g052510.2
GO:0009807	lignan biosynthetic process	1	1/714	3/10829	5.06	0.185063	0.789763	Solyc10g052510.2	Solyc10g052510.2
GO:0009819	drought recovery	1	1/714	3/10829	5.06	0.185063	0.789763	Solyc01g005400.3	Solyc01g005400.3
GO:0010019	chloroplast-nucleus signaling pathway	1	1/714	3/10829	5.06	0.185063	0.789763	Solyc01g008930.4	Solyc01g008930.4
GO:0010183	pollen tube guidance	1	1/714	3/10829	5.06	0.185063	0.789763	Solyc01g108910.4	Solyc01g108910.4
GO:0010342	endosperm cellularization	1	1/714	3/10829	5.06	0.185063	0.789763	Solyc01g096840.3	Solyc01g096840.3
GO:0010438	cellular response to sulfur starvation	1	1/714	3/10829	5.06	0.185063	0.789763	Solyc09g091600.4	Solyc09g091600.4
GO:0016052	carbohydrate catabolic process	1	1/714	3/10829	5.06	0.185063	0.789763	Solyc12g013750.2	Solyc12g013750.2
GO:0016255	attachment of GPI anchor to protein	1	1/714	3/10829	5.06	0.185063	0.789763	Solyc09g059960.3	Solyc09g059960.3
GO:0016553	base conversion or substitution editing	1	1/714	3/10829	5.06	0.185063	0.789763	Solyc05g006460.3	Solyc05g006460.3
GO:0016558	protein import into peroxisome matrix	1	1/714	3/10829	5.06	0.185063	0.789763	Solyc08g077440.3	Solyc08g077440.3
GO:0019287	isopentenyl diphosphate biosynthetic process, mevalonate pathway	1	1/714	3/10829	5.06	0.185063	0.789763	Solyc01g098840.3	Solyc01g098840.3
GO:0031222	arabinan catabolic process	1	1/714	3/10829	5.06	0.185063	0.789763	Solyc04g072850.4	Solyc04g072850.4
GO:0032264	IMP salvage	1	1/714	3/10829	5.06	0.185063	0.789763	Solyc05g006910.4	Solyc05g006910.4
GO:0032958	inositol phosphate biosynthetic process	1	1/714	3/10829	5.06	0.185063	0.789763	Solyc11g069780.3	Solyc11g069780.3
GO:0033015	tetrapyrrole catabolic process	1	1/714	3/10829	5.06	0.185063	0.789763	Solyc12g005300.2	Solyc12g005300.2
GO:0034440	lipid oxidation	1	1/714	3/10829	5.06	0.185063	0.789763	Solyc01g099160.4	Solyc01g099160.4
GO:0042435	indole-containing compound biosynthetic process	1	1/714	3/10829	5.06	0.185063	0.789763	Solyc07g063850.3	Solyc07g063850.3
GO:0042823	pyridoxal phosphate biosynthetic process	1	1/714	3/10829	5.06	0.185063	0.789763	Solyc03g120090.1	Solyc03g120090.1
GO:0043288	apocarotenoid metabolic process	1	1/714	3/10829	5.06	0.185063	0.789763	Solyc07g045190.3	Solyc07g045190.3
GO:0046081	dUTP catabolic process	1	1/714	3/10829	5.06	0.185063	0.789763	Solyc01g097970.4	Solyc01g097970.4
GO:0046149	pigment catabolic process	1	1/714	3/10829	5.06	0.185063	0.789763	Solyc12g005300.2	Solyc12g005300.2
GO:0046165	alcohol biosynthetic process	1	1/714	3/10829	5.06	0.185063	0.789763	Solyc11g069780.3	Solyc11g069780.3
GO:0046951	ketone body biosynthetic process	1	1/714	3/10829	5.06	0.185063	0.789763	Solyc06g011530.3	Solyc06g011530.3
GO:0050826	response to freezing	1	1/714	3/10829	5.06	0.185063	0.789763	Solyc03g116390.4	Solyc03g116390.4
GO:0051176	positive regulation of sulfur metabolic process	1	1/714	3/10829	5.06	0.185063	0.789763	Solyc07g063850.3	Solyc07g063850.3
GO:0051445	regulation of meiotic cell cycle	1	1/714	3/10829	5.06	0.185063	0.789763	Solyc01g044558.1	Solyc01g044558.1
GO:0052324	plant-type cell wall cellulose biosynthetic process	1	1/714	3/10829	5.06	0.185063	0.789763	Solyc02g065765.1	Solyc02g065765.1
GO:0055062	phosphate ion homeostasis	1	1/714	3/10829	5.06	0.185063	0.789763	Solyc12g010440.3	Solyc12g010440.3
GO:0071266	'de novo' L-methionine biosynthetic process	1	1/714	3/10829	5.06	0.185063	0.789763	Solyc04g055230.2	Solyc04g055230.2
GO:1901334	lactone metabolic process	1	1/714	3/10829	5.06	0.185063	0.789763	Solyc04g077860.4	Solyc04g077860.4
GO:1901336	lactone biosynthetic process	1	1/714	3/10829	5.06	0.185063	0.789763	Solyc04g077860.4	Solyc04g077860.4
GO:1901800	positive regulation of proteasomal protein catabolic process	1	1/714	3/10829	5.06	0.185063	0.789763	Solyc09g011030.3	Solyc09g011030.3
GO:1902644	tertiary alcohol metabolic process	1	1/714	3/10829	5.06	0.185063	0.789763	Solyc07g045190.3	Solyc07g045190.3
GO:1903052	positive regulation of proteolysis involved in cellular protein catabolic process	1	1/714	3/10829	5.06	0.185063	0.789763	Solyc09g011030.3	Solyc09g011030.3
GO:1903364	positive regulation of cellular protein catabolic process	1	1/714	3/10829	5.06	0.185063	0.789763	Solyc09g011030.3	Solyc09g011030.3
GO:2000060	positive regulation of protein ubiquitination involved in ubiquitin-dependent protein catabolic process	1	1/714	3/10829	5.06	0.185063	0.789763	Solyc09g011030.3	Solyc09g011030.3
GO:0006839	mitochondrial transport	2	2/714	12/10829	2.53	0.185219	0.789763	Solyc01g060070.3/Solyc05g051400.4	Solyc01g060070.3;Solyc05g051400.4
GO:0009561	megagametogenesis	2	2/714	12/10829	2.53	0.185219	0.789763	Solyc01g086690.2/Solyc06g073890.3	Solyc01g086690.2;Solyc06g073890.3
GO:0031348	negative regulation of defense response	2	2/714	12/10829	2.53	0.185219	0.789763	Solyc02g078030.3/Solyc07g040690.3	Solyc02g078030.3;Solyc07g040690.3
GO:1900140	regulation of seedling development	2	2/714	12/10829	2.53	0.185219	0.789763	Solyc06g084320.1/Solyc09g064820.1	Solyc06g084320.1;Solyc09g064820.1
GO:0016042	lipid catabolic process	6	6/714	59/10829	1.54	0.191548	0.813723	Solyc01g100020.4/Solyc02g094040.3/Solyc04g079250.3/Solyc05g051280.3/Solyc06g007120.3/Solyc08g066790.4	Solyc01g100020.4;Solyc02g094040.3;Solyc04g079250.3;Solyc05g051280.3;Solyc06g007120.3;Solyc08g066790.4
GO:0008299	isoprenoid biosynthetic process	4	4/714	35/10829	1.73	0.196976	0.833695	Solyc02g082260.3/Solyc04g077860.4/Solyc08g080160.4/Solyc10g005820.3	Solyc02g082260.3;Solyc04g077860.4;Solyc08g080160.4;Solyc10g005820.3
GO:0009617	response to bacterium	7	7/714	73/10829	1.45	0.204616	0.84023	Solyc01g095670.4/Solyc03g006050.4/Solyc03g006550.4/Solyc08g042100.3/Solyc08g080670.1/Solyc09g065870.4/Solyc12g005300.2	Solyc01g095670.4;Solyc03g006050.4;Solyc03g006550.4;Solyc08g042100.3;Solyc08g080670.1;Solyc09g065870.4;Solyc12g005300.2
GO:0055114	oxidation-reduction process	13	13/714	153/10829	1.29	0.20906	0.84023	Solyc01g007950.4/Solyc01g095670.4/Solyc02g070580.1/Solyc02g093910.3/Solyc03g044720.2/Solyc03g098460.3/Solyc05g053300.3/Solyc05g055700.3/Solyc08g082870.3/Solyc09g056360.3/Solyc09g097890.2/Solyc10g052510.2/Solyc12g019740.2	Solyc01g007950.4;Solyc01g095670.4;Solyc02g070580.1;Solyc02g093910.3;Solyc03g044720.2;Solyc03g098460.3;Solyc05g053300.3;Solyc05g055700.3;Solyc08g082870.3;Solyc09g056360.3;Solyc09g097890.2;Solyc10g052510.2;Solyc12g019740.2
GO:0009812	flavonoid metabolic process	2	2/714	13/10829	2.33	0.209863	0.84023	Solyc01g087050.3/Solyc07g063350.3	Solyc01g087050.3;Solyc07g063350.3
GO:0010029	regulation of seed germination	2	2/714	13/10829	2.33	0.209863	0.84023	Solyc06g084320.1/Solyc09g064820.1	Solyc06g084320.1;Solyc09g064820.1
GO:0051186	cofactor metabolic process	7	7/714	74/10829	1.43	0.214182	0.84023	Solyc02g078410.1/Solyc07g056490.4/Solyc07g063350.3/Solyc08g080900.3/Solyc09g011590.4/Solyc09g011650.4/Solyc12g005300.2	Solyc02g078410.1;Solyc07g056490.4;Solyc07g063350.3;Solyc08g080900.3;Solyc09g011590.4;Solyc09g011650.4;Solyc12g005300.2
GO:0009737	response to abscisic acid	11	11/714	127/10829	1.31	0.215643	0.84023	Solyc01g005400.3/Solyc02g093940.3/Solyc03g095780.3/Solyc06g084320.1/Solyc07g056060.4/Solyc08g082180.3/Solyc09g011590.4/Solyc09g011650.4/Solyc09g064820.1/Solyc10g076410.1/Solyc10g081490.2	Solyc01g005400.3;Solyc02g093940.3;Solyc03g095780.3;Solyc06g084320.1;Solyc07g056060.4;Solyc08g082180.3;Solyc09g011590.4;Solyc09g011650.4;Solyc09g064820.1;Solyc10g076410.1;Solyc10g081490.2
GO:0006486	protein glycosylation	9	9/714	101/10829	1.35	0.221113	0.84023	Solyc01g088650.4/Solyc02g092840.1/Solyc04g082390.3/Solyc04g082670.4/Solyc05g055420.4/Solyc06g074370.3/Solyc11g044570.3/Solyc12g008340.2/Solyc12g008360.2	Solyc01g088650.4;Solyc02g092840.1;Solyc04g082390.3;Solyc04g082670.4;Solyc05g055420.4;Solyc06g074370.3;Solyc11g044570.3;Solyc12g008340.2;Solyc12g008360.2
GO:0090567	reproductive shoot system development	6	6/714	62/10829	1.47	0.223185	0.84023	Solyc01g107250.3/Solyc02g092480.4/Solyc03g043770.4/Solyc03g044090.4/Solyc03g063140.4/Solyc10g083740.3	Solyc01g107250.3;Solyc02g092480.4;Solyc03g043770.4;Solyc03g044090.4;Solyc03g063140.4;Solyc10g083740.3
GO:0006633	fatty acid biosynthetic process	7	7/714	75/10829	1.42	0.223907	0.84023	Solyc02g063140.4/Solyc02g070790.3/Solyc03g005320.3/Solyc04g080450.1/Solyc05g009270.4/Solyc05g013220.2/Solyc11g072990.1	Solyc02g063140.4;Solyc02g070790.3;Solyc03g005320.3;Solyc04g080450.1;Solyc05g009270.4;Solyc05g013220.2;Solyc11g072990.1
GO:0009407	toxin catabolic process	4	4/714	37/10829	1.64	0.225154	0.84023	Solyc07g056490.4/Solyc08g080900.3/Solyc09g011590.4/Solyc09g011650.4	Solyc07g056490.4;Solyc08g080900.3;Solyc09g011590.4;Solyc09g011650.4
GO:0006284	base-excision repair	3	3/714	25/10829	1.82	0.225768	0.84023	Solyc02g021060.4/Solyc03g113880.4/Solyc10g005210.4	Solyc02g021060.4;Solyc03g113880.4;Solyc10g005210.4
GO:0001101	response to acid chemical	16	16/714	197/10829	1.23	0.227526	0.84023	Solyc01g005400.3/Solyc03g095780.3/Solyc03g116390.4/Solyc03g118200.4/Solyc03g118540.4/Solyc05g009170.3/Solyc06g050760.1/Solyc06g084320.1/Solyc07g045190.3/Solyc08g082180.3/Solyc09g011590.4/Solyc09g011650.4/Solyc09g064820.1/Solyc09g065870.4/Solyc10g076410.1/Solyc12g049400.2	Solyc01g005400.3;Solyc03g095780.3;Solyc03g116390.4;Solyc03g118200.4;Solyc03g118540.4;Solyc05g009170.3;Solyc06g050760.1;Solyc06g084320.1;Solyc07g045190.3;Solyc08g082180.3;Solyc09g011590.4;Solyc09g011650.4;Solyc09g064820.1;Solyc09g065870.4;Solyc10g076410.1;Solyc12g049400.2
GO:0043161	proteasome-mediated ubiquitin-dependent protein catabolic process	8	8/714	89/10829	1.36	0.232066	0.84023	Solyc02g093910.3/Solyc03g116480.1/Solyc03g120320.1/Solyc04g007120.4/Solyc05g007895.1/Solyc05g008640.1/Solyc06g073890.3/Solyc07g045190.3	Solyc02g093910.3;Solyc03g116480.1;Solyc03g120320.1;Solyc04g007120.4;Solyc05g007895.1;Solyc05g008640.1;Solyc06g073890.3;Solyc07g045190.3
GO:0006091	generation of precursor metabolites and energy	2	2/714	14/10829	2.17	0.234803	0.84023	Solyc01g095670.4/Solyc02g093910.3	Solyc01g095670.4;Solyc02g093910.3
GO:0009606	tropism	2	2/714	14/10829	2.17	0.234803	0.84023	Solyc02g092480.4/Solyc03g044090.4	Solyc02g092480.4;Solyc03g044090.4
GO:0016126	sterol biosynthetic process	2	2/714	14/10829	2.17	0.234803	0.84023	Solyc01g009310.3/Solyc01g098840.3	Solyc01g009310.3;Solyc01g098840.3
GO:0044550	secondary metabolite biosynthetic process	2	2/714	14/10829	2.17	0.234803	0.84023	Solyc07g063850.3/Solyc10g052510.2	Solyc07g063850.3;Solyc10g052510.2
GO:0002238	response to molecule of fungal origin	1	1/714	4/10829	3.79	0.23881	0.84023	Solyc06g050760.1	Solyc06g050760.1
GO:0006106	fumarate metabolic process	1	1/714	4/10829	3.79	0.23881	0.84023	Solyc09g075450.3	Solyc09g075450.3
GO:0006557	S-adenosylmethioninamine biosynthetic process	1	1/714	4/10829	3.79	0.23881	0.84023	Solyc05g010420.2	Solyc05g010420.2
GO:0006656	phosphatidylcholine biosynthetic process	1	1/714	4/10829	3.79	0.23881	0.84023	Solyc12g040790.2	Solyc12g040790.2
GO:0007021	tubulin complex assembly	1	1/714	4/10829	3.79	0.23881	0.84023	Solyc01g091080.3	Solyc01g091080.3
GO:0007349	cellularization	1	1/714	4/10829	3.79	0.23881	0.84023	Solyc01g096840.3	Solyc01g096840.3
GO:0009052	pentose-phosphate shunt, non-oxidative branch	1	1/714	4/10829	3.79	0.23881	0.84023	Solyc01g097460.3	Solyc01g097460.3
GO:0009061	anaerobic respiration	1	1/714	4/10829	3.79	0.23881	0.84023	Solyc02g093910.3	Solyc02g093910.3
GO:0009268	response to pH	1	1/714	4/10829	3.79	0.23881	0.84023	Solyc04g056320.3	Solyc04g056320.3
GO:0009403	toxin biosynthetic process	1	1/714	4/10829	3.79	0.23881	0.84023	Solyc07g063850.3	Solyc07g063850.3
GO:0009646	response to absence of light	1	1/714	4/10829	3.79	0.23881	0.84023	Solyc10g081490.2	Solyc10g081490.2
GO:0009718	anthocyanin-containing compound biosynthetic process	1	1/714	4/10829	3.79	0.23881	0.84023	Solyc07g063350.3	Solyc07g063350.3
GO:0009956	radial pattern formation	1	1/714	4/10829	3.79	0.23881	0.84023	Solyc03g112750.4	Solyc03g112750.4
GO:0010075	regulation of meristem growth	1	1/714	4/10829	3.79	0.23881	0.84023	Solyc03g043770.4	Solyc03g043770.4
GO:0010346	shoot axis formation	1	1/714	4/10829	3.79	0.23881	0.84023	Solyc04g077860.4	Solyc04g077860.4
GO:0010447	response to acidic pH	1	1/714	4/10829	3.79	0.23881	0.84023	Solyc04g056320.3	Solyc04g056320.3
GO:0015919	peroxisomal membrane transport	1	1/714	4/10829	3.79	0.23881	0.84023	Solyc12g017470.2	Solyc12g017470.2
GO:0016106	sesquiterpenoid biosynthetic process	1	1/714	4/10829	3.79	0.23881	0.84023	Solyc04g077860.4	Solyc04g077860.4
GO:0016560	protein import into peroxisome matrix, docking	1	1/714	4/10829	3.79	0.23881	0.84023	Solyc03g114330.3	Solyc03g114330.3
GO:0017157	regulation of exocytosis	1	1/714	4/10829	3.79	0.23881	0.84023	Solyc02g082690.3	Solyc02g082690.3
GO:0031145	anaphase-promoting complex-dependent catabolic process	1	1/714	4/10829	3.79	0.23881	0.84023	Solyc11g065190.3	Solyc11g065190.3
GO:0032507	maintenance of protein location in cell	1	1/714	4/10829	3.79	0.23881	0.84023	Solyc02g080610.4	Solyc02g080610.4
GO:0033037	polysaccharide localization	1	1/714	4/10829	3.79	0.23881	0.84023	Solyc02g077780.3	Solyc02g077780.3
GO:0042430	indole-containing compound metabolic process	1	1/714	4/10829	3.79	0.23881	0.84023	Solyc07g063850.3	Solyc07g063850.3
GO:0045732	positive regulation of protein catabolic process	1	1/714	4/10829	3.79	0.23881	0.84023	Solyc09g011030.3	Solyc09g011030.3
GO:0045862	positive regulation of proteolysis	1	1/714	4/10829	3.79	0.23881	0.84023	Solyc09g011030.3	Solyc09g011030.3
GO:0052545	callose localization	1	1/714	4/10829	3.79	0.23881	0.84023	Solyc02g077780.3	Solyc02g077780.3
GO:0060688	regulation of morphogenesis of a branching structure	1	1/714	4/10829	3.79	0.23881	0.84023	Solyc03g123400.1	Solyc03g123400.1
GO:0071367	cellular response to brassinosteroid stimulus	1	1/714	4/10829	3.79	0.23881	0.84023	Solyc01g107250.3	Solyc01g107250.3
GO:0071472	cellular response to salt stress	1	1/714	4/10829	3.79	0.23881	0.84023	Solyc12g006700.3	Solyc12g006700.3
GO:0071816	tail-anchored membrane protein insertion into ER membrane	1	1/714	4/10829	3.79	0.23881	0.84023	Solyc02g038815.1	Solyc02g038815.1
GO:0080037	negative regulation of cytokinin-activated signaling pathway	1	1/714	4/10829	3.79	0.23881	0.84023	Solyc03g120320.1	Solyc03g120320.1
GO:1900378	positive regulation of secondary metabolite biosynthetic process	1	1/714	4/10829	3.79	0.23881	0.84023	Solyc07g063850.3	Solyc07g063850.3
GO:1900618	regulation of shoot system morphogenesis	1	1/714	4/10829	3.79	0.23881	0.84023	Solyc03g123400.1	Solyc03g123400.1
GO:1902288	regulation of defense response to oomycetes	1	1/714	4/10829	3.79	0.23881	0.84023	Solyc03g006050.4	Solyc03g006050.4
GO:1902290	positive regulation of defense response to oomycetes	1	1/714	4/10829	3.79	0.23881	0.84023	Solyc03g006050.4	Solyc03g006050.4
GO:1905428	regulation of plant organ formation	1	1/714	4/10829	3.79	0.23881	0.84023	Solyc03g123400.1	Solyc03g123400.1
GO:2000031	regulation of salicylic acid mediated signaling pathway	1	1/714	4/10829	3.79	0.23881	0.84023	Solyc07g040690.3	Solyc07g040690.3
GO:0010026	trichome differentiation	3	3/714	26/10829	1.75	0.243694	0.852136	Solyc05g007895.1/Solyc05g009170.3/Solyc11g010440.3	Solyc05g007895.1;Solyc05g009170.3;Solyc11g010440.3
GO:0051346	negative regulation of hydrolase activity	3	3/714	26/10829	1.75	0.243694	0.852136	Solyc03g095780.3/Solyc08g082180.3/Solyc10g076410.1	Solyc03g095780.3;Solyc08g082180.3;Solyc10g076410.1
GO:0008610	lipid biosynthetic process	5	5/714	51/10829	1.49	0.244422	0.852136	Solyc01g088400.4/Solyc01g088430.4/Solyc01g091320.3/Solyc02g063240.4/Solyc04g077860.4	Solyc01g088400.4;Solyc01g088430.4;Solyc01g091320.3;Solyc02g063240.4;Solyc04g077860.4
GO:1901700	response to oxygen-containing compound	19	19/714	243/10829	1.19	0.251767	0.869354	Solyc01g005400.3/Solyc01g107250.3/Solyc03g095780.3/Solyc03g116390.4/Solyc03g118200.4/Solyc03g118540.4/Solyc03g119980.3/Solyc04g077860.4/Solyc05g009170.3/Solyc06g050760.1/Solyc06g084320.1/Solyc07g045190.3/Solyc08g082180.3/Solyc09g011590.4/Solyc09g011650.4/Solyc09g064820.1/Solyc09g065870.4/Solyc10g076410.1/Solyc12g049400.2	Solyc01g005400.3;Solyc01g107250.3;Solyc03g095780.3;Solyc03g116390.4;Solyc03g118200.4;Solyc03g118540.4;Solyc03g119980.3;Solyc04g077860.4;Solyc05g009170.3;Solyc06g050760.1;Solyc06g084320.1;Solyc07g045190.3;Solyc08g082180.3;Solyc09g011590.4;Solyc09g011650.4;Solyc09g064820.1;Solyc09g065870.4;Solyc10g076410.1;Solyc12g049400.2
GO:0006970	response to osmotic stress	7	7/714	78/10829	1.36	0.253951	0.869354	Solyc02g077780.3/Solyc05g008640.1/Solyc06g084320.1/Solyc07g045190.3/Solyc08g080670.1/Solyc08g082180.3/Solyc09g064820.1	Solyc02g077780.3;Solyc05g008640.1;Solyc06g084320.1;Solyc07g045190.3;Solyc08g080670.1;Solyc08g082180.3;Solyc09g064820.1
GO:0007017	microtubule-based process	6	6/714	65/10829	1.4	0.256386	0.869354	Solyc01g096840.3/Solyc06g071180.3/Solyc07g063610.4/Solyc12g006630.2/Solyc12g044240.3/Solyc12g089310.2	Solyc01g096840.3;Solyc06g071180.3;Solyc07g063610.4;Solyc12g006630.2;Solyc12g044240.3;Solyc12g089310.2
GO:0009415	response to water	6	6/714	65/10829	1.4	0.256386	0.869354	Solyc01g005400.3/Solyc03g116390.4/Solyc03g118200.4/Solyc06g084320.1/Solyc08g082180.3/Solyc09g064820.1	Solyc01g005400.3;Solyc03g116390.4;Solyc03g118200.4;Solyc06g084320.1;Solyc08g082180.3;Solyc09g064820.1
GO:0042440	pigment metabolic process	2	2/714	15/10829	2.02	0.259894	0.869354	Solyc07g063350.3/Solyc12g005300.2	Solyc07g063350.3;Solyc12g005300.2
GO:0006857	oligopeptide transport	4	4/714	40/10829	1.52	0.269123	0.869354	Solyc05g005970.3/Solyc06g075460.4/Solyc10g084940.3/Solyc10g084950.3	Solyc05g005970.3;Solyc06g075460.4;Solyc10g084940.3;Solyc10g084950.3
GO:0046777	protein autophosphorylation	4	4/714	40/10829	1.52	0.269123	0.869354	Solyc01g107250.3/Solyc03g112050.4/Solyc05g013300.1/Solyc05g013320.1	Solyc01g107250.3;Solyc03g112050.4;Solyc05g013300.1;Solyc05g013320.1
GO:0042742	defense response to bacterium	7	7/714	80/10829	1.33	0.274609	0.869354	Solyc01g095670.4/Solyc03g007240.3/Solyc07g040690.3/Solyc08g042100.3/Solyc08g080670.1/Solyc09g065870.4/Solyc12g005300.2	Solyc01g095670.4;Solyc03g007240.3;Solyc07g040690.3;Solyc08g042100.3;Solyc08g080670.1;Solyc09g065870.4;Solyc12g005300.2
GO:0031400	negative regulation of protein modification process	3	3/714	28/10829	1.62	0.280139	0.869354	Solyc03g095780.3/Solyc08g082180.3/Solyc10g076410.1	Solyc03g095780.3;Solyc08g082180.3;Solyc10g076410.1
GO:0000304	response to singlet oxygen	1	1/714	5/10829	3.03	0.289017	0.869354	Solyc03g006550.4	Solyc03g006550.4
GO:0001763	morphogenesis of a branching structure	1	1/714	5/10829	3.03	0.289017	0.869354	Solyc04g077860.4	Solyc04g077860.4
GO:0006741	NADP biosynthetic process	1	1/714	5/10829	3.03	0.289017	0.869354	Solyc01g008560.3	Solyc01g008560.3
GO:0006751	glutathione catabolic process	1	1/714	5/10829	3.03	0.289017	0.869354	Solyc08g006150.3	Solyc08g006150.3
GO:0007602	phototransduction	1	1/714	5/10829	3.03	0.289017	0.869354	Solyc07g047950.1	Solyc07g047950.1
GO:0009583	detection of light stimulus	1	1/714	5/10829	3.03	0.289017	0.869354	Solyc07g047950.1	Solyc07g047950.1
GO:0009694	jasmonic acid metabolic process	1	1/714	5/10829	3.03	0.289017	0.869354	Solyc01g108780.4	Solyc01g108780.4
GO:0009698	phenylpropanoid metabolic process	1	1/714	5/10829	3.03	0.289017	0.869354	Solyc10g052510.2	Solyc10g052510.2
GO:0009699	phenylpropanoid biosynthetic process	1	1/714	5/10829	3.03	0.289017	0.869354	Solyc10g052510.2	Solyc10g052510.2
GO:0009799	specification of symmetry	1	1/714	5/10829	3.03	0.289017	0.869354	Solyc03g063140.4	Solyc03g063140.4
GO:0009838	abscission	1	1/714	5/10829	3.03	0.289017	0.869354	Solyc01g107250.3	Solyc01g107250.3
GO:0009954	proximal/distal pattern formation	1	1/714	5/10829	3.03	0.289017	0.869354	Solyc03g063140.4	Solyc03g063140.4
GO:0010044	response to aluminum ion	1	1/714	5/10829	3.03	0.289017	0.869354	Solyc04g056320.3	Solyc04g056320.3
GO:0010089	xylem development	1	1/714	5/10829	3.03	0.289017	0.869354	Solyc01g091420.2	Solyc01g091420.2
GO:0010223	secondary shoot formation	1	1/714	5/10829	3.03	0.289017	0.869354	Solyc04g077860.4	Solyc04g077860.4
GO:0010439	regulation of glucosinolate biosynthetic process	1	1/714	5/10829	3.03	0.289017	0.869354	Solyc09g091600.4	Solyc09g091600.4
GO:0015711	organic anion transport	1	1/714	5/10829	3.03	0.289017	0.869354	Solyc01g060070.3	Solyc01g060070.3
GO:0015996	chlorophyll catabolic process	1	1/714	5/10829	3.03	0.289017	0.869354	Solyc12g005300.2	Solyc12g005300.2
GO:0019915	lipid storage	1	1/714	5/10829	3.03	0.289017	0.869354	Solyc04g056380.3	Solyc04g056380.3
GO:0030259	lipid glycosylation	1	1/714	5/10829	3.03	0.289017	0.869354	Solyc09g061860.4	Solyc09g061860.4
GO:0032434	regulation of proteasomal ubiquitin-dependent protein catabolic process	1	1/714	5/10829	3.03	0.289017	0.869354	Solyc09g011030.3	Solyc09g011030.3
GO:0032436	positive regulation of proteasomal ubiquitin-dependent protein catabolic process	1	1/714	5/10829	3.03	0.289017	0.869354	Solyc09g011030.3	Solyc09g011030.3
GO:0042138	meiotic DNA double-strand break formation	1	1/714	5/10829	3.03	0.289017	0.869354	Solyc07g005800.2	Solyc07g005800.2
GO:0042374	phylloquinone metabolic process	1	1/714	5/10829	3.03	0.289017	0.869354	Solyc02g078410.1	Solyc02g078410.1
GO:0043401	steroid hormone mediated signaling pathway	1	1/714	5/10829	3.03	0.289017	0.869354	Solyc01g107250.3	Solyc01g107250.3
GO:0045493	xylan catabolic process	1	1/714	5/10829	3.03	0.289017	0.869354	Solyc04g072850.4	Solyc04g072850.4
GO:0048441	petal development	1	1/714	5/10829	3.03	0.289017	0.869354	Solyc03g063140.4	Solyc03g063140.4
GO:0048465	corolla development	1	1/714	5/10829	3.03	0.289017	0.869354	Solyc03g063140.4	Solyc03g063140.4
GO:0051651	maintenance of location in cell	1	1/714	5/10829	3.03	0.289017	0.869354	Solyc02g080610.4	Solyc02g080610.4
GO:0052542	defense response by callose deposition	1	1/714	5/10829	3.03	0.289017	0.869354	Solyc02g077780.3	Solyc02g077780.3
GO:0070972	protein localization to endoplasmic reticulum	1	1/714	5/10829	3.03	0.289017	0.869354	Solyc02g080610.4	Solyc02g080610.4
GO:0071383	cellular response to steroid hormone stimulus	1	1/714	5/10829	3.03	0.289017	0.869354	Solyc01g107250.3	Solyc01g107250.3
GO:0080036	regulation of cytokinin-activated signaling pathway	1	1/714	5/10829	3.03	0.289017	0.869354	Solyc03g120320.1	Solyc03g120320.1
GO:0080148	negative regulation of response to water deprivation	1	1/714	5/10829	3.03	0.289017	0.869354	Solyc10g081490.2	Solyc10g081490.2
GO:0090376	seed trichome differentiation	1	1/714	5/10829	3.03	0.289017	0.869354	Solyc05g007895.1	Solyc05g007895.1
GO:0090378	seed trichome elongation	1	1/714	5/10829	3.03	0.289017	0.869354	Solyc05g007895.1	Solyc05g007895.1
GO:2000058	regulation of protein ubiquitination involved in ubiquitin-dependent protein catabolic process	1	1/714	5/10829	3.03	0.289017	0.869354	Solyc09g011030.3	Solyc09g011030.3
GO:2000762	regulation of phenylpropanoid metabolic process	1	1/714	5/10829	3.03	0.289017	0.869354	Solyc03g120320.1	Solyc03g120320.1
GO:0019752	carboxylic acid metabolic process	6	6/714	68/10829	1.34	0.290806	0.869354	Solyc07g045190.3/Solyc08g006740.3/Solyc08g006750.4/Solyc08g068600.3/Solyc08g068610.3/Solyc08g068680.4	Solyc07g045190.3;Solyc08g006740.3;Solyc08g006750.4;Solyc08g068600.3;Solyc08g068610.3;Solyc08g068680.4
GO:0010498	proteasomal protein catabolic process	7	7/714	82/10829	1.29	0.295682	0.869354	Solyc02g093910.3/Solyc03g116480.1/Solyc03g120320.1/Solyc05g007895.1/Solyc05g008640.1/Solyc06g073890.3/Solyc07g045190.3	Solyc02g093910.3;Solyc03g116480.1;Solyc03g120320.1;Solyc05g007895.1;Solyc05g008640.1;Solyc06g073890.3;Solyc07g045190.3
GO:0000160	phosphorelay signal transduction system	5	5/714	55/10829	1.38	0.295823	0.869354	Solyc02g071220.3/Solyc03g081240.3/Solyc03g115770.3/Solyc10g079600.2/Solyc10g086000.3	Solyc02g071220.3;Solyc03g081240.3;Solyc03g115770.3;Solyc10g079600.2;Solyc10g086000.3
GO:0009739	response to gibberellin	4	4/714	42/10829	1.44	0.299222	0.869354	Solyc05g009170.3/Solyc07g045190.3/Solyc09g011590.4/Solyc09g011650.4	Solyc05g009170.3;Solyc07g045190.3;Solyc09g011590.4;Solyc09g011650.4
GO:0006518	peptide metabolic process	6	6/714	69/10829	1.32	0.30249	0.869354	Solyc07g056490.4/Solyc08g080900.3/Solyc09g011590.4/Solyc09g011650.4/Solyc10g078660.2/Solyc10g083740.3	Solyc07g056490.4;Solyc08g080900.3;Solyc09g011590.4;Solyc09g011650.4;Solyc10g078660.2;Solyc10g083740.3
GO:0006790	sulfur compound metabolic process	6	6/714	69/10829	1.32	0.30249	0.869354	Solyc05g009170.3/Solyc07g056490.4/Solyc07g063850.3/Solyc08g080900.3/Solyc09g011590.4/Solyc09g011650.4	Solyc05g009170.3;Solyc07g056490.4;Solyc07g063850.3;Solyc08g080900.3;Solyc09g011590.4;Solyc09g011650.4
GO:0042254	ribosome biogenesis	5	5/714	56/10829	1.35	0.308962	0.869354	Solyc04g016380.3/Solyc08g006470.4/Solyc09g066500.4/Solyc10g078660.2/Solyc10g083740.3	Solyc04g016380.3;Solyc08g006470.4;Solyc09g066500.4;Solyc10g078660.2;Solyc10g083740.3
GO:0003333	amino acid transmembrane transport	2	2/714	17/10829	1.78	0.31003	0.869354	Solyc01g060070.3/Solyc10g078470.2	Solyc01g060070.3;Solyc10g078470.2
GO:0010565	regulation of cellular ketone metabolic process	2	2/714	17/10829	1.78	0.31003	0.869354	Solyc02g077780.3/Solyc04g017610.2	Solyc02g077780.3;Solyc04g017610.2
GO:0016114	terpenoid biosynthetic process	2	2/714	17/10829	1.78	0.31003	0.869354	Solyc01g009010.3/Solyc04g077860.4	Solyc01g009010.3;Solyc04g077860.4
GO:0043255	regulation of carbohydrate biosynthetic process	2	2/714	17/10829	1.78	0.31003	0.869354	Solyc04g017610.2/Solyc09g091600.4	Solyc04g017610.2;Solyc09g091600.4
GO:0098869	cellular oxidant detoxification	2	2/714	17/10829	1.78	0.31003	0.869354	Solyc03g096770.1/Solyc03g096780.1	Solyc03g096770.1;Solyc03g096780.1
GO:0009414	response to water deprivation	6	6/714	70/10829	1.3	0.314258	0.869354	Solyc01g005400.3/Solyc03g116390.4/Solyc06g084320.1/Solyc08g082180.3/Solyc09g064820.1/Solyc10g081490.2	Solyc01g005400.3;Solyc03g116390.4;Solyc06g084320.1;Solyc08g082180.3;Solyc09g064820.1;Solyc10g081490.2
GO:0022613	ribonucleoprotein complex biogenesis	4	4/714	43/10829	1.41	0.314422	0.869354	Solyc04g016380.3/Solyc08g006470.4/Solyc10g078660.2/Solyc10g083740.3	Solyc04g016380.3;Solyc08g006470.4;Solyc10g078660.2;Solyc10g083740.3
GO:0031347	regulation of defense response	5	5/714	57/10829	1.33	0.32218	0.869354	Solyc02g078030.3/Solyc03g006050.4/Solyc03g118540.4/Solyc11g005720.1/Solyc12g049400.2	Solyc02g078030.3;Solyc03g006050.4;Solyc03g118540.4;Solyc11g005720.1;Solyc12g049400.2
GO:0043603	cellular amide metabolic process	6	6/714	71/10829	1.28	0.326097	0.869354	Solyc07g056490.4/Solyc08g080900.3/Solyc09g011590.4/Solyc09g011650.4/Solyc10g078660.2/Solyc10g083740.3	Solyc07g056490.4;Solyc08g080900.3;Solyc09g011590.4;Solyc09g011650.4;Solyc10g078660.2;Solyc10g083740.3
GO:0019941	modification-dependent protein catabolic process	8	8/714	99/10829	1.23	0.328426	0.869354	Solyc02g093910.3/Solyc03g116480.1/Solyc03g120320.1/Solyc05g007895.1/Solyc05g008640.1/Solyc06g073890.3/Solyc07g045190.3/Solyc08g083120.3	Solyc02g093910.3;Solyc03g116480.1;Solyc03g120320.1;Solyc05g007895.1;Solyc05g008640.1;Solyc06g073890.3;Solyc07g045190.3;Solyc08g083120.3
GO:0010118	stomatal movement	2	2/714	18/10829	1.69	0.334866	0.869354	Solyc02g071830.3/Solyc10g081490.2	Solyc02g071830.3;Solyc10g081490.2
GO:0043414	macromolecule methylation	2	2/714	18/10829	1.69	0.334866	0.869354	Solyc03g083210.3/Solyc11g010440.3	Solyc03g083210.3;Solyc11g010440.3
GO:0001678	cellular glucose homeostasis	1	1/714	6/10829	2.53	0.335916	0.869354	Solyc06g066440.3	Solyc06g066440.3
GO:0002791	regulation of peptide secretion	1	1/714	6/10829	2.53	0.335916	0.869354	Solyc02g082690.3	Solyc02g082690.3
GO:0006333	chromatin assembly or disassembly	1	1/714	6/10829	2.53	0.335916	0.869354	Solyc05g008480.4	Solyc05g008480.4
GO:0006526	arginine biosynthetic process	1	1/714	6/10829	2.53	0.335916	0.869354	Solyc02g092260.3	Solyc02g092260.3
GO:0006820	anion transport	1	1/714	6/10829	2.53	0.335916	0.869354	Solyc01g060070.3	Solyc01g060070.3
GO:0007023	post-chaperonin tubulin folding pathway	1	1/714	6/10829	2.53	0.335916	0.869354	Solyc01g091080.3	Solyc01g091080.3
GO:0007076	mitotic chromosome condensation	1	1/714	6/10829	2.53	0.335916	0.869354	Solyc11g011370.2	Solyc11g011370.2
GO:0009072	aromatic amino acid family metabolic process	1	1/714	6/10829	2.53	0.335916	0.869354	Solyc01g091330.4	Solyc01g091330.4
GO:0009269	response to desiccation	1	1/714	6/10829	2.53	0.335916	0.869354	Solyc11g068550.1	Solyc11g068550.1
GO:0009904	chloroplast accumulation movement	1	1/714	6/10829	2.53	0.335916	0.869354	Solyc07g065680.3	Solyc07g065680.3
GO:0010227	floral organ abscission	1	1/714	6/10829	2.53	0.335916	0.869354	Solyc01g107250.3	Solyc01g107250.3
GO:0010540	basipetal auxin transport	1	1/714	6/10829	2.53	0.335916	0.869354	Solyc03g112750.4	Solyc03g112750.4
GO:0010964	regulation of chromatin silencing by small RNA	1	1/714	6/10829	2.53	0.335916	0.869354	Solyc03g083210.3	Solyc03g083210.3
GO:0016485	protein processing	1	1/714	6/10829	2.53	0.335916	0.869354	Solyc08g077440.3	Solyc08g077440.3
GO:0019318	hexose metabolic process	1	1/714	6/10829	2.53	0.335916	0.869354	Solyc02g087780.3	Solyc02g087780.3
GO:0019750	chloroplast localization	1	1/714	6/10829	2.53	0.335916	0.869354	Solyc07g065680.3	Solyc07g065680.3
GO:0030071	regulation of mitotic metaphase/anaphase transition	1	1/714	6/10829	2.53	0.335916	0.869354	Solyc11g065190.3	Solyc11g065190.3
GO:0042753	positive regulation of circadian rhythm	1	1/714	6/10829	2.53	0.335916	0.869354	Solyc07g041340.2	Solyc07g041340.2
GO:0044272	sulfur compound biosynthetic process	1	1/714	6/10829	2.53	0.335916	0.869354	Solyc07g063850.3	Solyc07g063850.3
GO:0045185	maintenance of protein location	1	1/714	6/10829	2.53	0.335916	0.869354	Solyc02g080610.4	Solyc02g080610.4
GO:0046283	anthocyanin-containing compound metabolic process	1	1/714	6/10829	2.53	0.335916	0.869354	Solyc07g063350.3	Solyc07g063350.3
GO:0048545	response to steroid hormone	1	1/714	6/10829	2.53	0.335916	0.869354	Solyc01g107250.3	Solyc01g107250.3
GO:0050708	regulation of protein secretion	1	1/714	6/10829	2.53	0.335916	0.869354	Solyc02g082690.3	Solyc02g082690.3
GO:0051047	positive regulation of secretion	1	1/714	6/10829	2.53	0.335916	0.869354	Solyc02g082690.3	Solyc02g082690.3
GO:0051187	cofactor catabolic process	1	1/714	6/10829	2.53	0.335916	0.869354	Solyc12g005300.2	Solyc12g005300.2
GO:0051209	release of sequestered calcium ion into cytosol	1	1/714	6/10829	2.53	0.335916	0.869354	Solyc06g007120.3	Solyc06g007120.3
GO:0051289	protein homotetramerization	1	1/714	6/10829	2.53	0.335916	0.869354	Solyc02g078410.1	Solyc02g078410.1
GO:0051644	plastid localization	1	1/714	6/10829	2.53	0.335916	0.869354	Solyc07g065680.3	Solyc07g065680.3
GO:0051667	establishment of plastid localization	1	1/714	6/10829	2.53	0.335916	0.869354	Solyc07g065680.3	Solyc07g065680.3
GO:0055081	anion homeostasis	1	1/714	6/10829	2.53	0.335916	0.869354	Solyc07g032170.3	Solyc07g032170.3
GO:0061136	regulation of proteasomal protein catabolic process	1	1/714	6/10829	2.53	0.335916	0.869354	Solyc09g011030.3	Solyc09g011030.3
GO:0070921	regulation of production of siRNA involved in chromatin silencing by small RNA	1	1/714	6/10829	2.53	0.335916	0.869354	Solyc03g083210.3	Solyc03g083210.3
GO:0080163	regulation of protein serine/threonine phosphatase activity	1	1/714	6/10829	2.53	0.335916	0.869354	Solyc06g050500.2	Solyc06g050500.2
GO:1901617	organic hydroxy compound biosynthetic process	1	1/714	6/10829	2.53	0.335916	0.869354	Solyc11g069780.3	Solyc11g069780.3
GO:1903050	regulation of proteolysis involved in cellular protein catabolic process	1	1/714	6/10829	2.53	0.335916	0.869354	Solyc09g011030.3	Solyc09g011030.3
GO:1903362	regulation of cellular protein catabolic process	1	1/714	6/10829	2.53	0.335916	0.869354	Solyc09g011030.3	Solyc09g011030.3
GO:1903532	positive regulation of secretion by cell	1	1/714	6/10829	2.53	0.335916	0.869354	Solyc02g082690.3	Solyc02g082690.3
GO:1905183	negative regulation of protein serine/threonine phosphatase activity	1	1/714	6/10829	2.53	0.335916	0.869354	Solyc08g082180.3	Solyc08g082180.3
GO:0023052	signaling	13	13/714	171/10829	1.15	0.338119	0.869354	Solyc01g107250.3/Solyc03g095780.3/Solyc03g118540.4/Solyc05g009170.3/Solyc06g084320.1/Solyc07g047950.1/Solyc07g063850.3/Solyc08g082180.3/Solyc09g064820.1/Solyc09g065870.4/Solyc10g076410.1/Solyc10g083740.3/Solyc11g005720.1	Solyc01g107250.3;Solyc03g095780.3;Solyc03g118540.4;Solyc05g009170.3;Solyc06g084320.1;Solyc07g047950.1;Solyc07g063850.3;Solyc08g082180.3;Solyc09g064820.1;Solyc09g065870.4;Solyc10g076410.1;Solyc10g083740.3;Solyc11g005720.1
GO:0050790	regulation of catalytic activity	8	8/714	100/10829	1.21	0.338476	0.869354	Solyc02g082690.3/Solyc03g095780.3/Solyc07g049580.3/Solyc07g065090.2/Solyc08g082180.3/Solyc09g011030.3/Solyc09g014480.3/Solyc10g076410.1	Solyc02g082690.3;Solyc03g095780.3;Solyc07g049580.3;Solyc07g065090.2;Solyc08g082180.3;Solyc09g011030.3;Solyc09g014480.3;Solyc10g076410.1
GO:0070887	cellular response to chemical stimulus	14	14/714	186/10829	1.14	0.343019	0.869354	Solyc01g044556.1/Solyc01g107250.3/Solyc03g095780.3/Solyc03g118540.4/Solyc04g077860.4/Solyc05g007895.1/Solyc05g009170.3/Solyc06g084320.1/Solyc07g063850.3/Solyc08g082180.3/Solyc09g064820.1/Solyc09g065870.4/Solyc10g076410.1/Solyc10g083740.3	Solyc01g044556.1;Solyc01g107250.3;Solyc03g095780.3;Solyc03g118540.4;Solyc04g077860.4;Solyc05g007895.1;Solyc05g009170.3;Solyc06g084320.1;Solyc07g063850.3;Solyc08g082180.3;Solyc09g064820.1;Solyc09g065870.4;Solyc10g076410.1;Solyc10g083740.3
GO:0009826	unidimensional cell growth	4	4/714	45/10829	1.35	0.34499	0.869354	Solyc02g080230.3/Solyc03g006880.3/Solyc05g007895.1/Solyc07g063850.3	Solyc02g080230.3;Solyc03g006880.3;Solyc05g007895.1;Solyc07g063850.3
GO:0009734	auxin-activated signaling pathway	7	7/714	87/10829	1.22	0.349672	0.869354	Solyc07g063850.3/Solyc08g021820.3/Solyc08g062180.3/Solyc10g078370.2/Solyc10g083740.3/Solyc11g013480.3/Solyc12g096980.3	Solyc07g063850.3;Solyc08g021820.3;Solyc08g062180.3;Solyc10g078370.2;Solyc10g083740.3;Solyc11g013480.3;Solyc12g096980.3
GO:0080134	regulation of response to stress	7	7/714	87/10829	1.22	0.349672	0.869354	Solyc02g078030.3/Solyc03g006050.4/Solyc03g118540.4/Solyc05g008640.1/Solyc07g045190.3/Solyc11g005720.1/Solyc12g049400.2	Solyc02g078030.3;Solyc03g006050.4;Solyc03g118540.4;Solyc05g008640.1;Solyc07g045190.3;Solyc11g005720.1;Solyc12g049400.2
GO:0006302	double-strand break repair	2	2/714	19/10829	1.6	0.359431	0.869354	Solyc01g086690.2/Solyc03g083190.3	Solyc01g086690.2;Solyc03g083190.3
GO:0010101	post-embryonic root morphogenesis	2	2/714	19/10829	1.6	0.359431	0.869354	Solyc01g091420.2/Solyc06g063270.4	Solyc01g091420.2;Solyc06g063270.4
GO:0010102	lateral root morphogenesis	2	2/714	19/10829	1.6	0.359431	0.869354	Solyc01g091420.2/Solyc06g063270.4	Solyc01g091420.2;Solyc06g063270.4
GO:0048232	male gamete generation	2	2/714	19/10829	1.6	0.359431	0.869354	Solyc01g044558.1/Solyc06g075640.2	Solyc01g044558.1;Solyc06g075640.2
GO:0051188	cofactor biosynthetic process	2	2/714	19/10829	1.6	0.359431	0.869354	Solyc02g078410.1/Solyc07g063350.3	Solyc02g078410.1;Solyc07g063350.3
GO:0071407	cellular response to organic cyclic compound	2	2/714	19/10829	1.6	0.359431	0.869354	Solyc01g107250.3/Solyc04g077860.4	Solyc01g107250.3;Solyc04g077860.4
GO:0007018	microtubule-based movement	6	6/714	74/10829	1.23	0.361918	0.869354	Solyc01g066820.4/Solyc02g062330.3/Solyc02g084390.3/Solyc03g005620.4/Solyc03g119220.3/Solyc07g065210.4	Solyc01g066820.4;Solyc02g062330.3;Solyc02g084390.3;Solyc03g005620.4;Solyc03g119220.3;Solyc07g065210.4
GO:0009116	nucleoside metabolic process	3	3/714	33/10829	1.38	0.372386	0.869354	Solyc08g066890.4/Solyc08g066923.1/Solyc10g007760.4	Solyc08g066890.4;Solyc08g066923.1;Solyc10g007760.4
GO:0006575	cellular modified amino acid metabolic process	4	4/714	47/10829	1.29	0.375614	0.869354	Solyc07g056490.4/Solyc08g080900.3/Solyc09g011590.4/Solyc09g011650.4	Solyc07g056490.4;Solyc08g080900.3;Solyc09g011590.4;Solyc09g011650.4
GO:0048366	leaf development	4	4/714	47/10829	1.29	0.375614	0.869354	Solyc03g112750.4/Solyc04g076210.3/Solyc06g050760.1/Solyc07g043330.3	Solyc03g112750.4;Solyc04g076210.3;Solyc06g050760.1;Solyc07g043330.3
GO:0006081	cellular aldehyde metabolic process	1	1/714	7/10829	2.17	0.379726	0.869354	Solyc03g098460.3	Solyc03g098460.3
GO:0006183	GTP biosynthetic process	1	1/714	7/10829	2.17	0.379726	0.869354	Solyc01g089970.3	Solyc01g089970.3
GO:0006228	UTP biosynthetic process	1	1/714	7/10829	2.17	0.379726	0.869354	Solyc01g089970.3	Solyc01g089970.3
GO:0006241	CTP biosynthetic process	1	1/714	7/10829	2.17	0.379726	0.869354	Solyc01g089970.3	Solyc01g089970.3
GO:0006465	signal peptide processing	1	1/714	7/10829	2.17	0.379726	0.869354	Solyc04g072032.1	Solyc04g072032.1
GO:0006479	protein methylation	1	1/714	7/10829	2.17	0.379726	0.869354	Solyc11g010440.3	Solyc11g010440.3
GO:0006488	dolichol-linked oligosaccharide biosynthetic process	1	1/714	7/10829	2.17	0.379726	0.869354	Solyc02g085850.1	Solyc02g085850.1
GO:0006782	protoporphyrinogen IX biosynthetic process	1	1/714	7/10829	2.17	0.379726	0.869354	Solyc01g106390.3	Solyc01g106390.3
GO:0007094	mitotic spindle assembly checkpoint	1	1/714	7/10829	2.17	0.379726	0.869354	Solyc07g053820.3	Solyc07g053820.3
GO:0008213	protein alkylation	1	1/714	7/10829	2.17	0.379726	0.869354	Solyc11g010440.3	Solyc11g010440.3
GO:0008295	spermidine biosynthetic process	1	1/714	7/10829	2.17	0.379726	0.869354	Solyc05g010420.2	Solyc05g010420.2
GO:0009110	vitamin biosynthetic process	1	1/714	7/10829	2.17	0.379726	0.869354	Solyc02g078410.1	Solyc02g078410.1
GO:0009816	defense response to bacterium, incompatible interaction	1	1/714	7/10829	2.17	0.379726	0.869354	Solyc08g080670.1	Solyc08g080670.1
GO:0009825	multidimensional cell growth	1	1/714	7/10829	2.17	0.379726	0.869354	Solyc03g112750.4	Solyc03g112750.4
GO:0009902	chloroplast relocation	1	1/714	7/10829	2.17	0.379726	0.869354	Solyc07g065680.3	Solyc07g065680.3
GO:0009903	chloroplast avoidance movement	1	1/714	7/10829	2.17	0.379726	0.869354	Solyc07g065680.3	Solyc07g065680.3
GO:0010017	red or far-red light signaling pathway	1	1/714	7/10829	2.17	0.379726	0.869354	Solyc07g047950.1	Solyc07g047950.1
GO:0010043	response to zinc ion	1	1/714	7/10829	2.17	0.379726	0.869354	Solyc03g119980.3	Solyc03g119980.3
GO:0010088	phloem development	1	1/714	7/10829	2.17	0.379726	0.869354	Solyc03g111815.1	Solyc03g111815.1
GO:0015936	coenzyme A metabolic process	1	1/714	7/10829	2.17	0.379726	0.869354	Solyc02g082260.3	Solyc02g082260.3
GO:0015937	coenzyme A biosynthetic process	1	1/714	7/10829	2.17	0.379726	0.869354	Solyc05g005250.3	Solyc05g005250.3
GO:0015980	energy derivation by oxidation of organic compounds	1	1/714	7/10829	2.17	0.379726	0.869354	Solyc02g093910.3	Solyc02g093910.3
GO:0016101	diterpenoid metabolic process	1	1/714	7/10829	2.17	0.379726	0.869354	Solyc03g098460.3	Solyc03g098460.3
GO:0016125	sterol metabolic process	1	1/714	7/10829	2.17	0.379726	0.869354	Solyc02g070580.1	Solyc02g070580.1
GO:0016571	histone methylation	1	1/714	7/10829	2.17	0.379726	0.869354	Solyc11g010440.3	Solyc11g010440.3
GO:0018022	peptidyl-lysine methylation	1	1/714	7/10829	2.17	0.379726	0.869354	Solyc11g010440.3	Solyc11g010440.3
GO:0019674	NAD metabolic process	1	1/714	7/10829	2.17	0.379726	0.869354	Solyc01g008560.3	Solyc01g008560.3
GO:0032981	mitochondrial respiratory chain complex I assembly	1	1/714	7/10829	2.17	0.379726	0.869354	Solyc11g005060.2	Solyc11g005060.2
GO:0034968	histone lysine methylation	1	1/714	7/10829	2.17	0.379726	0.869354	Solyc11g010440.3	Solyc11g010440.3
GO:0042181	ketone biosynthetic process	1	1/714	7/10829	2.17	0.379726	0.869354	Solyc02g078410.1	Solyc02g078410.1
GO:0042737	drug catabolic process	1	1/714	7/10829	2.17	0.379726	0.869354	Solyc01g095670.4	Solyc01g095670.4
GO:0042793	transcription from plastid promoter	1	1/714	7/10829	2.17	0.379726	0.869354	Solyc02g093940.3	Solyc02g093940.3
GO:0044036	cell wall macromolecule metabolic process	1	1/714	7/10829	2.17	0.379726	0.869354	Solyc12g013750.2	Solyc12g013750.2
GO:0045333	cellular respiration	1	1/714	7/10829	2.17	0.379726	0.869354	Solyc02g093910.3	Solyc02g093910.3
GO:0045912	negative regulation of carbohydrate metabolic process	1	1/714	7/10829	2.17	0.379726	0.869354	Solyc04g017610.2	Solyc04g017610.2
GO:0046137	negative regulation of vitamin metabolic process	1	1/714	7/10829	2.17	0.379726	0.869354	Solyc04g017610.2	Solyc04g017610.2
GO:0048764	trichoblast maturation	1	1/714	7/10829	2.17	0.379726	0.869354	Solyc11g010440.3	Solyc11g010440.3
GO:0048765	root hair cell differentiation	1	1/714	7/10829	2.17	0.379726	0.869354	Solyc11g010440.3	Solyc11g010440.3
GO:0051026	chiasma assembly	1	1/714	7/10829	2.17	0.379726	0.869354	Solyc07g005800.2	Solyc07g005800.2
GO:0051195	negative regulation of cofactor metabolic process	1	1/714	7/10829	2.17	0.379726	0.869354	Solyc04g017610.2	Solyc04g017610.2
GO:0051196	regulation of coenzyme metabolic process	1	1/714	7/10829	2.17	0.379726	0.869354	Solyc04g017610.2	Solyc04g017610.2
GO:0051198	negative regulation of coenzyme metabolic process	1	1/714	7/10829	2.17	0.379726	0.869354	Solyc04g017610.2	Solyc04g017610.2
GO:0051560	mitochondrial calcium ion homeostasis	1	1/714	7/10829	2.17	0.379726	0.869354	Solyc02g065550.4	Solyc02g065550.4
GO:0060966	regulation of gene silencing by RNA	1	1/714	7/10829	2.17	0.379726	0.869354	Solyc03g083210.3	Solyc03g083210.3
GO:0070920	regulation of production of small RNA involved in gene silencing by RNA	1	1/714	7/10829	2.17	0.379726	0.869354	Solyc03g083210.3	Solyc03g083210.3
GO:0071489	cellular response to red or far red light	1	1/714	7/10829	2.17	0.379726	0.869354	Solyc07g047950.1	Solyc07g047950.1
GO:1900057	positive regulation of leaf senescence	1	1/714	7/10829	2.17	0.379726	0.869354	Solyc11g017470.2	Solyc11g017470.2
GO:1901661	quinone metabolic process	1	1/714	7/10829	2.17	0.379726	0.869354	Solyc02g078410.1	Solyc02g078410.1
GO:1901663	quinone biosynthetic process	1	1/714	7/10829	2.17	0.379726	0.869354	Solyc02g078410.1	Solyc02g078410.1
GO:1902074	response to salt	1	1/714	7/10829	2.17	0.379726	0.869354	Solyc10g081490.2	Solyc10g081490.2
GO:2000082	regulation of L-ascorbic acid biosynthetic process	1	1/714	7/10829	2.17	0.379726	0.869354	Solyc04g017610.2	Solyc04g017610.2
GO:2000083	negative regulation of L-ascorbic acid biosynthetic process	1	1/714	7/10829	2.17	0.379726	0.869354	Solyc04g017610.2	Solyc04g017610.2
GO:0140013	meiotic nuclear division	2	2/714	20/10829	1.52	0.383653	0.876594	Solyc01g044558.1/Solyc06g075640.2	Solyc01g044558.1;Solyc06g075640.2
GO:0016567	protein ubiquitination	11	11/714	148/10829	1.13	0.385372	0.878771	Solyc01g086960.3/Solyc03g116480.1/Solyc05g007895.1/Solyc05g008640.1/Solyc06g073890.3/Solyc07g045190.3/Solyc08g042100.3/Solyc08g077100.3/Solyc08g083120.3/Solyc09g065870.4/Solyc10g007000.3	Solyc01g086960.3;Solyc03g116480.1;Solyc05g007895.1;Solyc05g008640.1;Solyc06g073890.3;Solyc07g045190.3;Solyc08g042100.3;Solyc08g077100.3;Solyc08g083120.3;Solyc09g065870.4;Solyc10g007000.3
GO:0097305	response to alcohol	8	8/714	105/10829	1.16	0.389262	0.883852	Solyc01g005400.3/Solyc03g095780.3/Solyc06g084320.1/Solyc08g082180.3/Solyc09g011590.4/Solyc09g011650.4/Solyc09g064820.1/Solyc10g076410.1	Solyc01g005400.3;Solyc03g095780.3;Solyc06g084320.1;Solyc08g082180.3;Solyc09g011590.4;Solyc09g011650.4;Solyc09g064820.1;Solyc10g076410.1
GO:0030162	regulation of proteolysis	3	3/714	34/10829	1.34	0.390683	0.883852	Solyc02g093910.3/Solyc03g120320.1/Solyc09g011030.3	Solyc02g093910.3;Solyc03g120320.1;Solyc09g011030.3
GO:0090558	plant epidermis development	3	3/714	34/10829	1.34	0.390683	0.883852	Solyc05g007895.1/Solyc05g009170.3/Solyc11g010440.3	Solyc05g007895.1;Solyc05g009170.3;Solyc11g010440.3
GO:1903046	meiotic cell cycle process	3	3/714	34/10829	1.34	0.390683	0.883852	Solyc01g044558.1/Solyc01g107250.3/Solyc06g075640.2	Solyc01g044558.1;Solyc01g107250.3;Solyc06g075640.2
GO:0009725	response to hormone	19	19/714	266/10829	1.08	0.392477	0.886163	Solyc01g005400.3/Solyc01g044556.1/Solyc01g095580.3/Solyc01g107250.3/Solyc03g095780.3/Solyc03g118540.4/Solyc04g077860.4/Solyc05g009170.3/Solyc06g084320.1/Solyc07g045190.3/Solyc07g063850.3/Solyc08g082180.3/Solyc09g011590.4/Solyc09g011650.4/Solyc09g064820.1/Solyc09g065870.4/Solyc10g076410.1/Solyc10g083740.3/Solyc12g049400.2	Solyc01g005400.3;Solyc01g044556.1;Solyc01g095580.3;Solyc01g107250.3;Solyc03g095780.3;Solyc03g118540.4;Solyc04g077860.4;Solyc05g009170.3;Solyc06g084320.1;Solyc07g045190.3;Solyc07g063850.3;Solyc08g082180.3;Solyc09g011590.4;Solyc09g011650.4;Solyc09g064820.1;Solyc09g065870.4;Solyc10g076410.1;Solyc10g083740.3;Solyc12g049400.2
GO:0006952	defense response	24	24/714	340/10829	1.07	0.39411	0.888102	Solanum_lycopersicum_newGene_2721/Solyc01g095670.4/Solyc02g070380.1/Solyc02g077780.3/Solyc03g120290.3/Solyc04g007760.3/Solyc04g007790.3/Solyc04g009130.4/Solyc04g009250.1/Solyc04g009260.3/Solyc04g009660.2/Solyc05g009630.4/Solyc07g008710.3/Solyc07g049700.1/Solyc08g042100.3/Solyc08g076000.4/Solyc08g080670.1/Solyc09g065870.4/Solyc10g008640.3/Solyc11g010160.1/Solyc11g069220.2/Solyc12g005300.2/Solyc12g…	--;Solyc01g095670.4;Solyc02g070380.1;Solyc02g077780.3;Solyc03g120290.3;Solyc04g007760.3;Solyc04g007790.3;Solyc04g009130.4;Solyc04g009250.1;Solyc04g009260.3;Solyc04g009660.2;Solyc05g009630.4;Solyc07g008710.3;Solyc07g049700.1;Solyc08g042100.3;Solyc08g076000.4;Solyc08g080670.1;Solyc09g065870.4;Solyc10g008640.3;Solyc11g010160.1;Solyc11g069220.2;Solyc12g005300.2;Solyc12g005970.1;Solyc12g006040.3
GO:0009719	response to endogenous stimulus	19	19/714	269/10829	1.07	0.411787	0.899765	Solyc01g005400.3/Solyc01g044556.1/Solyc01g095580.3/Solyc01g107250.3/Solyc03g095780.3/Solyc03g118540.4/Solyc04g077860.4/Solyc05g009170.3/Solyc06g084320.1/Solyc07g045190.3/Solyc07g063850.3/Solyc08g082180.3/Solyc09g011590.4/Solyc09g011650.4/Solyc09g064820.1/Solyc09g065870.4/Solyc10g076410.1/Solyc10g083740.3/Solyc12g049400.2	Solyc01g005400.3;Solyc01g044556.1;Solyc01g095580.3;Solyc01g107250.3;Solyc03g095780.3;Solyc03g118540.4;Solyc04g077860.4;Solyc05g009170.3;Solyc06g084320.1;Solyc07g045190.3;Solyc07g063850.3;Solyc08g082180.3;Solyc09g011590.4;Solyc09g011650.4;Solyc09g064820.1;Solyc09g065870.4;Solyc10g076410.1;Solyc10g083740.3;Solyc12g049400.2
GO:0051336	regulation of hydrolase activity	5	5/714	64/10829	1.18	0.415517	0.899765	Solyc02g082690.3/Solyc03g095780.3/Solyc07g049580.3/Solyc08g082180.3/Solyc10g076410.1	Solyc02g082690.3;Solyc03g095780.3;Solyc07g049580.3;Solyc08g082180.3;Solyc10g076410.1
GO:0007154	cell communication	14	14/714	196/10829	1.08	0.418011	0.899765	Solyc01g107250.3/Solyc03g095780.3/Solyc03g118540.4/Solyc05g009170.3/Solyc06g084320.1/Solyc07g047950.1/Solyc07g063850.3/Solyc08g082180.3/Solyc09g064820.1/Solyc09g065870.4/Solyc09g091600.4/Solyc10g076410.1/Solyc10g083740.3/Solyc11g005720.1	Solyc01g107250.3;Solyc03g095780.3;Solyc03g118540.4;Solyc05g009170.3;Solyc06g084320.1;Solyc07g047950.1;Solyc07g063850.3;Solyc08g082180.3;Solyc09g064820.1;Solyc09g065870.4;Solyc09g091600.4;Solyc10g076410.1;Solyc10g083740.3;Solyc11g005720.1
GO:0006021	inositol biosynthetic process	1	1/714	8/10829	1.9	0.42065	0.899765	Solyc11g012410.2	Solyc11g012410.2
GO:0006221	pyrimidine nucleotide biosynthetic process	1	1/714	8/10829	1.9	0.42065	0.899765	Solyc01g098530.3	Solyc01g098530.3
GO:0006487	protein N-linked glycosylation	1	1/714	8/10829	1.9	0.42065	0.899765	Solyc06g054450.3	Solyc06g054450.3
GO:0006626	protein targeting to mitochondrion	1	1/714	8/10829	1.9	0.42065	0.899765	Solyc01g060070.3	Solyc01g060070.3
GO:0006779	porphyrin-containing compound biosynthetic process	1	1/714	8/10829	1.9	0.42065	0.899765	Solyc07g063350.3	Solyc07g063350.3
GO:0007205	protein kinase C-activating G-protein coupled receptor signaling pathway	1	1/714	8/10829	1.9	0.42065	0.899765	Solyc10g008640.3	Solyc10g008640.3
GO:0009089	lysine biosynthetic process via diaminopimelate	1	1/714	8/10829	1.9	0.42065	0.899765	Solyc03g044660.3	Solyc03g044660.3
GO:0009298	GDP-mannose biosynthetic process	1	1/714	8/10829	1.9	0.42065	0.899765	Solyc02g086090.4	Solyc02g086090.4
GO:0010054	trichoblast differentiation	1	1/714	8/10829	1.9	0.42065	0.899765	Solyc11g010440.3	Solyc11g010440.3
GO:0010112	regulation of systemic acquired resistance	1	1/714	8/10829	1.9	0.42065	0.899765	Solyc07g040690.3	Solyc07g040690.3
GO:0010193	response to ozone	1	1/714	8/10829	1.9	0.42065	0.899765	Solyc06g050760.1	Solyc06g050760.1
GO:0016102	diterpenoid biosynthetic process	1	1/714	8/10829	1.9	0.42065	0.899765	Solyc03g006550.4	Solyc03g006550.4
GO:0016104	triterpenoid biosynthetic process	1	1/714	8/10829	1.9	0.42065	0.899765	Solyc04g070980.4	Solyc04g070980.4
GO:0042180	cellular ketone metabolic process	1	1/714	8/10829	1.9	0.42065	0.899765	Solyc02g078410.1	Solyc02g078410.1
GO:0042372	phylloquinone biosynthetic process	1	1/714	8/10829	1.9	0.42065	0.899765	Solyc02g078410.1	Solyc02g078410.1
GO:0048015	phosphatidylinositol-mediated signaling	1	1/714	8/10829	1.9	0.42065	0.899765	Solyc06g007120.3	Solyc06g007120.3
GO:0051046	regulation of secretion	1	1/714	8/10829	1.9	0.42065	0.899765	Solyc02g082690.3	Solyc02g082690.3
GO:0070585	protein localization to mitochondrion	1	1/714	8/10829	1.9	0.42065	0.899765	Solyc01g060070.3	Solyc01g060070.3
GO:0071218	cellular response to misfolded protein	1	1/714	8/10829	1.9	0.42065	0.899765	Solyc05g007895.1	Solyc05g007895.1
GO:0072655	establishment of protein localization to mitochondrion	1	1/714	8/10829	1.9	0.42065	0.899765	Solyc01g060070.3	Solyc01g060070.3
GO:0080188	RNA-directed DNA methylation	1	1/714	8/10829	1.9	0.42065	0.899765	Solyc03g083210.3	Solyc03g083210.3
GO:0090627	plant epidermal cell differentiation	1	1/714	8/10829	1.9	0.42065	0.899765	Solyc11g010440.3	Solyc11g010440.3
GO:0090693	plant organ senescence	1	1/714	8/10829	1.9	0.42065	0.899765	Solyc06g050760.1	Solyc06g050760.1
GO:1903530	regulation of secretion by cell	1	1/714	8/10829	1.9	0.42065	0.899765	Solyc02g082690.3	Solyc02g082690.3
GO:1901566	organonitrogen compound biosynthetic process	4	4/714	50/10829	1.21	0.42125	0.899765	Solyc07g063350.3/Solyc07g063850.3/Solyc10g078660.2/Solyc10g083740.3	Solyc07g063350.3;Solyc07g063850.3;Solyc10g078660.2;Solyc10g083740.3
GO:0043632	modification-dependent macromolecule catabolic process	7	7/714	94/10829	1.13	0.426568	0.906628	Solyc02g093910.3/Solyc03g116480.1/Solyc03g120320.1/Solyc05g007895.1/Solyc05g008640.1/Solyc06g073890.3/Solyc07g045190.3	Solyc02g093910.3;Solyc03g116480.1;Solyc03g120320.1;Solyc05g007895.1;Solyc05g008640.1;Solyc06g073890.3;Solyc07g045190.3
GO:0006096	glycolytic process	3	3/714	36/10829	1.26	0.426835	0.906628	Solyc02g150124.1/Solyc04g072800.4/Solyc06g066440.3	Solyc02g150124.1;Solyc04g072800.4;Solyc06g066440.3
GO:0070925	organelle assembly	3	3/714	36/10829	1.26	0.426835	0.906628	Solyc04g016380.3/Solyc10g078660.2/Solyc10g083740.3	Solyc04g016380.3;Solyc10g078660.2;Solyc10g083740.3
GO:0017144	drug metabolic process	2	2/714	22/10829	1.38	0.430831	0.910062	Solyc01g095670.4/Solyc11g069780.3	Solyc01g095670.4;Solyc11g069780.3
GO:0031146	SCF-dependent proteasomal ubiquitin-dependent protein catabolic process	2	2/714	22/10829	1.38	0.430831	0.910062	Solyc03g116480.1/Solyc07g008250.3	Solyc03g116480.1;Solyc07g008250.3
GO:0043043	peptide biosynthetic process	2	2/714	22/10829	1.38	0.430831	0.910062	Solyc10g078660.2/Solyc10g083740.3	Solyc10g078660.2;Solyc10g083740.3
GO:0009628	response to abiotic stimulus	23	23/714	332/10829	1.05	0.43371	0.914459	Solyc01g005400.3/Solyc01g095580.3/Solyc02g077780.3/Solyc02g092480.4/Solyc03g044090.4/Solyc03g116390.4/Solyc03g117590.3/Solyc03g118200.4/Solyc04g056320.3/Solyc05g008640.1/Solyc06g068500.3/Solyc06g084320.1/Solyc07g045190.3/Solyc07g047950.1/Solyc07g063350.3/Solyc07g063850.3/Solyc08g080670.1/Solyc08g081840.3/Solyc08g082180.3/Solyc09g011590.4/Solyc09g011650.4/Solyc09g064820.1/Solyc11g020330.1	Solyc01g005400.3;Solyc01g095580.3;Solyc02g077780.3;Solyc02g092480.4;Solyc03g044090.4;Solyc03g116390.4;Solyc03g117590.3;Solyc03g118200.4;Solyc04g056320.3;Solyc05g008640.1;Solyc06g068500.3;Solyc06g084320.1;Solyc07g045190.3;Solyc07g047950.1;Solyc07g063350.3;Solyc07g063850.3;Solyc08g080670.1;Solyc08g081840.3;Solyc08g082180.3;Solyc09g011590.4;Solyc09g011650.4;Solyc09g064820.1;Solyc11g020330.1
GO:0031399	regulation of protein modification process	4	4/714	51/10829	1.19	0.436299	0.916548	Solyc03g095780.3/Solyc08g082180.3/Solyc09g011030.3/Solyc10g076410.1	Solyc03g095780.3;Solyc08g082180.3;Solyc09g011030.3;Solyc10g076410.1
GO:0098754	detoxification	4	4/714	51/10829	1.19	0.436299	0.916548	Solyc07g056490.4/Solyc08g080900.3/Solyc09g011590.4/Solyc09g011650.4	Solyc07g056490.4;Solyc08g080900.3;Solyc09g011590.4;Solyc09g011650.4
GO:0050896	response to stimulus	49	49/714	723/10829	1.03	0.441245	0.922408	Solyc01g005400.3/Solyc01g044556.1/Solyc01g095580.3/Solyc01g095670.4/Solyc01g107250.3/Solyc02g062670.3/Solyc02g077780.3/Solyc02g092480.4/Solyc03g006050.4/Solyc03g044090.4/Solyc03g083190.3/Solyc03g095780.3/Solyc03g116390.4/Solyc03g117590.3/Solyc03g118200.4/Solyc03g118540.4/Solyc03g119980.3/Solyc03g120290.3/Solyc04g056320.3/Solyc04g077860.4/Solyc05g007895.1/Solyc05g008640.1/Solyc05g009170.3/Solyc06g…	Solyc01g005400.3;Solyc01g044556.1;Solyc01g095580.3;Solyc01g095670.4;Solyc01g107250.3;Solyc02g062670.3;Solyc02g077780.3;Solyc02g092480.4;Solyc03g006050.4;Solyc03g044090.4;Solyc03g083190.3;Solyc03g095780.3;Solyc03g116390.4;Solyc03g117590.3;Solyc03g118200.4;Solyc03g118540.4;Solyc03g119980.3;Solyc03g120290.3;Solyc04g056320.3;Solyc04g077860.4;Solyc05g007895.1;Solyc05g008640.1;Solyc05g009170.3;Solyc06g…
GO:1901565	organonitrogen compound catabolic process	9	9/714	125/10829	1.09	0.442418	0.922408	Solyc01g095670.4/Solyc02g093910.3/Solyc03g116480.1/Solyc03g120320.1/Solyc05g007895.1/Solyc05g008640.1/Solyc06g073890.3/Solyc07g045190.3/Solyc12g005300.2	Solyc01g095670.4;Solyc02g093910.3;Solyc03g116480.1;Solyc03g120320.1;Solyc05g007895.1;Solyc05g008640.1;Solyc06g073890.3;Solyc07g045190.3;Solyc12g005300.2
GO:0010038	response to metal ion	6	6/714	81/10829	1.12	0.445763	0.922408	Solyc03g119980.3/Solyc04g056320.3/Solyc09g011590.4/Solyc09g011650.4/Solyc09g098090.4/Solyc10g052510.2	Solyc03g119980.3;Solyc04g056320.3;Solyc09g011590.4;Solyc09g011650.4;Solyc09g098090.4;Solyc10g052510.2
GO:0006109	regulation of carbohydrate metabolic process	2	2/714	23/10829	1.32	0.453692	0.922408	Solyc04g017610.2/Solyc09g091600.4	Solyc04g017610.2;Solyc09g091600.4
GO:0043604	amide biosynthetic process	2	2/714	23/10829	1.32	0.453692	0.922408	Solyc10g078660.2/Solyc10g083740.3	Solyc10g078660.2;Solyc10g083740.3
GO:0090305	nucleic acid phosphodiester bond hydrolysis	22	22/714	321/10829	1.04	0.457195	0.922408	Solyc01g007267.1/Solyc01g088490.3/Solyc02g069500.1/Solyc02g072010.3/Solyc02g085650.4/Solyc03g113750.3/Solyc03g116540.1/Solyc04g010050.4/Solyc04g010060.2/Solyc04g064660.1/Solyc04g079150.1/Solyc05g006460.3/Solyc05g008330.3/Solyc05g012140.3/Solyc06g009800.3/Solyc06g069700.4/Solyc08g023490.4/Solyc08g078570.3/Solyc08g079640.3/Solyc09g005710.3/Solyc10g007520.3/Solyc11g012570.3	Solyc01g007267.1;Solyc01g088490.3;Solyc02g069500.1;Solyc02g072010.3;Solyc02g085650.4;Solyc03g113750.3;Solyc03g116540.1;Solyc04g010050.4;Solyc04g010060.2;Solyc04g064660.1;Solyc04g079150.1;Solyc05g006460.3;Solyc05g008330.3;Solyc05g012140.3;Solyc06g009800.3;Solyc06g069700.4;Solyc08g023490.4;Solyc08g078570.3;Solyc08g079640.3;Solyc09g005710.3;Solyc10g007520.3;Solyc11g012570.3
GO:0006189	'de novo' IMP biosynthetic process	1	1/714	9/10829	1.69	0.458877	0.922408	Solyc11g006340.2	Solyc11g006340.2
GO:0006305	DNA alkylation	1	1/714	9/10829	1.69	0.458877	0.922408	Solyc03g083210.3	Solyc03g083210.3
GO:0006766	vitamin metabolic process	1	1/714	9/10829	1.69	0.458877	0.922408	Solyc02g078410.1	Solyc02g078410.1
GO:0006878	cellular copper ion homeostasis	1	1/714	9/10829	1.69	0.458877	0.922408	Solyc02g082080.1	Solyc02g082080.1
GO:0009581	detection of external stimulus	1	1/714	9/10829	1.69	0.458877	0.922408	Solyc07g047950.1	Solyc07g047950.1
GO:0009582	detection of abiotic stimulus	1	1/714	9/10829	1.69	0.458877	0.922408	Solyc07g047950.1	Solyc07g047950.1
GO:0009682	induced systemic resistance	1	1/714	9/10829	1.69	0.458877	0.922408	Solyc07g040690.3	Solyc07g040690.3
GO:0009896	positive regulation of catabolic process	1	1/714	9/10829	1.69	0.458877	0.922408	Solyc09g011030.3	Solyc09g011030.3
GO:0009960	endosperm development	1	1/714	9/10829	1.69	0.458877	0.922408	Solyc01g096840.3	Solyc01g096840.3
GO:0010053	root epidermal cell differentiation	1	1/714	9/10829	1.69	0.458877	0.922408	Solyc11g010440.3	Solyc11g010440.3
GO:0010152	pollen maturation	1	1/714	9/10829	1.69	0.458877	0.922408	Solyc01g107250.3	Solyc01g107250.3
GO:0030656	regulation of vitamin metabolic process	1	1/714	9/10829	1.69	0.458877	0.922408	Solyc04g017610.2	Solyc04g017610.2
GO:0031331	positive regulation of cellular catabolic process	1	1/714	9/10829	1.69	0.458877	0.922408	Solyc09g011030.3	Solyc09g011030.3
GO:0051017	actin filament bundle assembly	1	1/714	9/10829	1.69	0.458877	0.922408	Solyc09g056170.3	Solyc09g056170.3
GO:0051235	maintenance of location	1	1/714	9/10829	1.69	0.458877	0.922408	Solyc02g080610.4	Solyc02g080610.4
GO:0051262	protein tetramerization	1	1/714	9/10829	1.69	0.458877	0.922408	Solyc02g078410.1	Solyc02g078410.1
GO:0051788	response to misfolded protein	1	1/714	9/10829	1.69	0.458877	0.922408	Solyc05g007895.1	Solyc05g007895.1
GO:1990542	mitochondrial transmembrane transport	1	1/714	9/10829	1.69	0.458877	0.922408	Solyc01g060070.3	Solyc01g060070.3
GO:0065009	regulation of molecular function	9	9/714	127/10829	1.07	0.461459	0.922408	Solyc02g078030.3/Solyc02g082690.3/Solyc03g095780.3/Solyc07g049580.3/Solyc07g065090.2/Solyc08g082180.3/Solyc09g011030.3/Solyc09g014480.3/Solyc10g076410.1	Solyc02g078030.3;Solyc02g082690.3;Solyc03g095780.3;Solyc07g049580.3;Solyc07g065090.2;Solyc08g082180.3;Solyc09g011030.3;Solyc09g014480.3;Solyc10g076410.1
GO:0042221	response to chemical	29	29/714	427/10829	1.03	0.462031	0.922408	Solyc01g005400.3/Solyc01g044556.1/Solyc01g095580.3/Solyc01g107250.3/Solyc03g095780.3/Solyc03g116390.4/Solyc03g118200.4/Solyc03g118540.4/Solyc03g119980.3/Solyc04g056320.3/Solyc04g077860.4/Solyc05g007895.1/Solyc05g009170.3/Solyc06g050760.1/Solyc06g084320.1/Solyc07g045190.3/Solyc07g056490.4/Solyc07g063850.3/Solyc08g080900.3/Solyc08g082180.3/Solyc09g011590.4/Solyc09g011650.4/Solyc09g064820.1/Solyc09g…	Solyc01g005400.3;Solyc01g044556.1;Solyc01g095580.3;Solyc01g107250.3;Solyc03g095780.3;Solyc03g116390.4;Solyc03g118200.4;Solyc03g118540.4;Solyc03g119980.3;Solyc04g056320.3;Solyc04g077860.4;Solyc05g007895.1;Solyc05g009170.3;Solyc06g050760.1;Solyc06g084320.1;Solyc07g045190.3;Solyc07g056490.4;Solyc07g063850.3;Solyc08g080900.3;Solyc08g082180.3;Solyc09g011590.4;Solyc09g011650.4;Solyc09g064820.1;Solyc09g…
GO:0010015	root morphogenesis	3	3/714	38/10829	1.2	0.462203	0.922408	Solyc01g091420.2/Solyc06g063270.4/Solyc11g010440.3	Solyc01g091420.2;Solyc06g063270.4;Solyc11g010440.3
GO:0051321	meiotic cell cycle	3	3/714	38/10829	1.2	0.462203	0.922408	Solyc01g044558.1/Solyc01g107250.3/Solyc06g075640.2	Solyc01g044558.1;Solyc01g107250.3;Solyc06g075640.2
GO:0031323	regulation of cellular metabolic process	27	27/714	397/10829	1.03	0.46241	0.922408	Solyc01g087050.3/Solyc01g091420.2/Solyc02g062670.3/Solyc02g077780.3/Solyc02g078030.3/Solyc02g080610.4/Solyc02g092570.1/Solyc03g083210.3/Solyc03g095780.3/Solyc03g116480.1/Solyc03g118540.4/Solyc03g120320.1/Solyc03g123400.1/Solyc04g017610.2/Solyc04g056320.3/Solyc05g009170.3/Solyc07g043330.3/Solyc07g047950.1/Solyc07g063350.3/Solyc07g063850.3/Solyc08g006470.4/Solyc08g082180.3/Solyc09g011030.3/Solyc09g…	Solyc01g087050.3;Solyc01g091420.2;Solyc02g062670.3;Solyc02g077780.3;Solyc02g078030.3;Solyc02g080610.4;Solyc02g092570.1;Solyc03g083210.3;Solyc03g095780.3;Solyc03g116480.1;Solyc03g118540.4;Solyc03g120320.1;Solyc03g123400.1;Solyc04g017610.2;Solyc04g056320.3;Solyc05g009170.3;Solyc07g043330.3;Solyc07g047950.1;Solyc07g063350.3;Solyc07g063850.3;Solyc08g006470.4;Solyc08g082180.3;Solyc09g011030.3;Solyc09g…
GO:0016049	cell growth	4	4/714	53/10829	1.14	0.466042	0.928039	Solyc02g080230.3/Solyc03g112750.4/Solyc05g007895.1/Solyc07g063850.3	Solyc02g080230.3;Solyc03g112750.4;Solyc05g007895.1;Solyc07g063850.3
GO:0030001	metal ion transport	6	6/714	83/10829	1.1	0.469398	0.933101	Solyc01g099600.4/Solyc01g105160.4/Solyc04g054500.3/Solyc06g072700.3/Solyc09g008200.4/Solyc12g150113.1	Solyc01g099600.4;Solyc01g105160.4;Solyc04g054500.3;Solyc06g072700.3;Solyc09g008200.4;Solyc12g150113.1
GO:0099402	plant organ development	9	9/714	128/10829	1.07	0.470939	0.934544	Solyc01g091420.2/Solyc01g107250.3/Solyc03g043770.4/Solyc03g063140.4/Solyc03g112750.4/Solyc06g050760.1/Solyc06g063270.4/Solyc07g043330.3/Solyc11g010440.3	Solyc01g091420.2;Solyc01g107250.3;Solyc03g043770.4;Solyc03g063140.4;Solyc03g112750.4;Solyc06g050760.1;Solyc06g063270.4;Solyc07g043330.3;Solyc11g010440.3
GO:0009451	RNA modification	24	24/714	354/10829	1.03	0.474394	0.936472	Solyc01g007267.1/Solyc01g088490.3/Solyc02g069500.1/Solyc02g072010.3/Solyc02g085650.4/Solyc03g113750.3/Solyc03g116540.1/Solyc04g010050.4/Solyc04g010060.2/Solyc04g064660.1/Solyc04g079150.1/Solyc05g006460.3/Solyc05g008330.3/Solyc05g012140.3/Solyc06g009800.3/Solyc06g069700.4/Solyc08g023490.4/Solyc08g078570.3/Solyc08g079640.3/Solyc09g005710.3/Solyc10g007520.3/Solyc10g054730.1/Solyc11g007230.1/Solyc11g…	Solyc01g007267.1;Solyc01g088490.3;Solyc02g069500.1;Solyc02g072010.3;Solyc02g085650.4;Solyc03g113750.3;Solyc03g116540.1;Solyc04g010050.4;Solyc04g010060.2;Solyc04g064660.1;Solyc04g079150.1;Solyc05g006460.3;Solyc05g008330.3;Solyc05g012140.3;Solyc06g009800.3;Solyc06g069700.4;Solyc08g023490.4;Solyc08g078570.3;Solyc08g079640.3;Solyc09g005710.3;Solyc10g007520.3;Solyc10g054730.1;Solyc11g007230.1;Solyc11g…
GO:0000724	double-strand break repair via homologous recombination	2	2/714	24/10829	1.26	0.476017	0.936472	Solyc03g083190.3/Solyc08g005060.3	Solyc03g083190.3;Solyc08g005060.3
GO:1901421	positive regulation of response to alcohol	2	2/714	24/10829	1.26	0.476017	0.936472	Solyc05g008640.1/Solyc07g045190.3	Solyc05g008640.1;Solyc07g045190.3
GO:1905959	positive regulation of cellular response to alcohol	2	2/714	24/10829	1.26	0.476017	0.936472	Solyc05g008640.1/Solyc07g045190.3	Solyc05g008640.1;Solyc07g045190.3
GO:0009639	response to red or far red light	3	3/714	39/10829	1.17	0.47953	0.936472	Solyc07g047950.1/Solyc07g062310.4/Solyc08g081840.3	Solyc07g047950.1;Solyc07g062310.4;Solyc08g081840.3
GO:0044255	cellular lipid metabolic process	3	3/714	39/10829	1.17	0.47953	0.936472	Solyc03g098460.3/Solyc04g077860.4/Solyc07g045190.3	Solyc03g098460.3;Solyc04g077860.4;Solyc07g045190.3
GO:0048229	gametophyte development	5	5/714	70/10829	1.08	0.493918	0.936472	Solyc01g044558.1/Solyc01g107250.3/Solyc03g043770.4/Solyc06g073890.3/Solyc06g075640.2	Solyc01g044558.1;Solyc01g107250.3;Solyc03g043770.4;Solyc06g073890.3;Solyc06g075640.2
GO:0006108	malate metabolic process	1	1/714	10/10829	1.52	0.494585	0.936472	Solyc09g090140.4	Solyc09g090140.4
GO:0006621	protein retention in ER lumen	1	1/714	10/10829	1.52	0.494585	0.936472	Solyc02g080610.4	Solyc02g080610.4
GO:0009585	red, far-red light phototransduction	1	1/714	10/10829	1.52	0.494585	0.936472	Solyc07g047950.1	Solyc07g047950.1
GO:0009624	response to nematode	1	1/714	10/10829	1.52	0.494585	0.936472	Solyc06g050760.1	Solyc06g050760.1
GO:0009741	response to brassinosteroid	1	1/714	10/10829	1.52	0.494585	0.936472	Solyc01g107250.3	Solyc01g107250.3
GO:0009832	plant-type cell wall biogenesis	1	1/714	10/10829	1.52	0.494585	0.936472	Solyc02g065765.1	Solyc02g065765.1
GO:0009959	negative gravitropism	1	1/714	10/10829	1.52	0.494585	0.936472	Solyc07g062310.4	Solyc07g062310.4
GO:0016117	carotenoid biosynthetic process	1	1/714	10/10829	1.52	0.494585	0.936472	Solyc06g074240.3	Solyc06g074240.3
GO:0019346	transsulfuration	1	1/714	10/10829	1.52	0.494585	0.936472	Solyc04g055230.2	Solyc04g055230.2
GO:0033014	tetrapyrrole biosynthetic process	1	1/714	10/10829	1.52	0.494585	0.936472	Solyc07g063350.3	Solyc07g063350.3
GO:0034220	ion transmembrane transport	1	1/714	10/10829	1.52	0.494585	0.936472	Solyc01g060070.3	Solyc01g060070.3
GO:0035967	cellular response to topologically incorrect protein	1	1/714	10/10829	1.52	0.494585	0.936472	Solyc05g007895.1	Solyc05g007895.1
GO:0044743	protein transmembrane import into intracellular organelle	1	1/714	10/10829	1.52	0.494585	0.936472	Solyc01g060070.3	Solyc01g060070.3
GO:0045793	positive regulation of cell size	1	1/714	10/10829	1.52	0.494585	0.936472	Solyc03g118200.4	Solyc03g118200.4
GO:0051193	regulation of cofactor metabolic process	1	1/714	10/10829	1.52	0.494585	0.936472	Solyc04g017610.2	Solyc04g017610.2
GO:0071369	cellular response to ethylene stimulus	1	1/714	10/10829	1.52	0.494585	0.936472	Solyc01g044556.1	Solyc01g044556.1
GO:0090407	organophosphate biosynthetic process	1	1/714	10/10829	1.52	0.494585	0.936472	Solyc11g069780.3	Solyc11g069780.3
GO:1900426	positive regulation of defense response to bacterium	1	1/714	10/10829	1.52	0.494585	0.936472	Solyc03g006050.4	Solyc03g006050.4
GO:1901000	regulation of response to salt stress	1	1/714	10/10829	1.52	0.494585	0.936472	Solyc04g076210.3	Solyc04g076210.3
GO:2000012	regulation of auxin polar transport	1	1/714	10/10829	1.52	0.494585	0.936472	Solyc07g056650.4	Solyc07g056650.4
GO:0007165	signal transduction	20	20/714	297/10829	1.02	0.494771	0.936472	Solyc01g008800.3/Solyc01g102880.3/Solyc01g107250.3/Solyc02g088910.3/Solyc03g095780.3/Solyc03g118540.4/Solyc05g009170.3/Solyc06g007440.4/Solyc06g084320.1/Solyc07g047950.1/Solyc07g063850.3/Solyc08g082180.3/Solyc09g064820.1/Solyc09g065870.4/Solyc10g076410.1/Solyc10g083740.3/Solyc10g085440.1/Solyc11g005720.1/Solyc12g096900.2/Solyc12g097020.2	Solyc01g008800.3;Solyc01g102880.3;Solyc01g107250.3;Solyc02g088910.3;Solyc03g095780.3;Solyc03g118540.4;Solyc05g009170.3;Solyc06g007440.4;Solyc06g084320.1;Solyc07g047950.1;Solyc07g063850.3;Solyc08g082180.3;Solyc09g064820.1;Solyc09g065870.4;Solyc10g076410.1;Solyc10g083740.3;Solyc10g085440.1;Solyc11g005720.1;Solyc12g096900.2;Solyc12g097020.2
GO:0000904	cell morphogenesis involved in differentiation	3	3/714	40/10829	1.14	0.49659	0.936823	Solyc02g080230.3/Solyc05g007895.1/Solyc05g009170.3	Solyc02g080230.3;Solyc05g007895.1;Solyc05g009170.3
GO:0006888	ER to Golgi vesicle-mediated transport	3	3/714	40/10829	1.14	0.49659	0.936823	Solyc01g080850.4/Solyc02g032930.3/Solyc03g120260.4	Solyc01g080850.4;Solyc02g032930.3;Solyc03g120260.4
GO:0001522	pseudouridine synthesis	2	2/714	25/10829	1.21	0.497778	0.937523	Solyc02g081810.4/Solyc09g066500.4	Solyc02g081810.4;Solyc09g066500.4
GO:0044248	cellular catabolic process	14	14/714	207/10829	1.03	0.500884	0.941827	Solyc01g095670.4/Solyc02g093910.3/Solyc03g116480.1/Solyc03g120320.1/Solyc05g007895.1/Solyc05g008640.1/Solyc06g073890.3/Solyc07g045190.3/Solyc07g056490.4/Solyc08g080900.3/Solyc09g011590.4/Solyc09g011650.4/Solyc12g005300.2/Solyc12g013750.2	Solyc01g095670.4;Solyc02g093910.3;Solyc03g116480.1;Solyc03g120320.1;Solyc05g007895.1;Solyc05g008640.1;Solyc06g073890.3;Solyc07g045190.3;Solyc07g056490.4;Solyc08g080900.3;Solyc09g011590.4;Solyc09g011650.4;Solyc12g005300.2;Solyc12g013750.2
GO:0019953	sexual reproduction	5	5/714	71/10829	1.07	0.506632	0.951074	Solyc01g044558.1/Solyc01g107250.3/Solyc01g112000.4/Solyc06g075640.2/Solyc10g008440.3	Solyc01g044558.1;Solyc01g107250.3;Solyc01g112000.4;Solyc06g075640.2;Solyc10g008440.3
GO:0009664	plant-type cell wall organization	4	4/714	56/10829	1.08	0.50953	0.954953	Solyc02g065765.1/Solyc03g115890.3/Solyc04g081870.4/Solyc09g010860.4	Solyc02g065765.1;Solyc03g115890.3;Solyc04g081870.4;Solyc09g010860.4
GO:0009791	post-embryonic development	15	15/714	224/10829	1.02	0.514059	0.958553	Solyc01g091420.2/Solyc01g096840.3/Solyc01g107250.3/Solyc02g092480.4/Solyc03g043770.4/Solyc03g044090.4/Solyc03g063140.4/Solyc05g007895.1/Solyc06g063270.4/Solyc06g084320.1/Solyc07g047950.1/Solyc08g023490.4/Solyc08g082180.3/Solyc09g064820.1/Solyc10g083740.3	Solyc01g091420.2;Solyc01g096840.3;Solyc01g107250.3;Solyc02g092480.4;Solyc03g043770.4;Solyc03g044090.4;Solyc03g063140.4;Solyc05g007895.1;Solyc06g063270.4;Solyc06g084320.1;Solyc07g047950.1;Solyc08g023490.4;Solyc08g082180.3;Solyc09g064820.1;Solyc10g083740.3
GO:1905393	plant organ formation	2	2/714	26/10829	1.17	0.518952	0.958553	Solyc01g091420.2/Solyc04g077860.4	Solyc01g091420.2;Solyc04g077860.4
GO:0044257	cellular protein catabolic process	7	7/714	103/10829	1.03	0.523429	0.958553	Solyc02g093910.3/Solyc03g116480.1/Solyc03g120320.1/Solyc05g007895.1/Solyc05g008640.1/Solyc06g073890.3/Solyc07g045190.3	Solyc02g093910.3;Solyc03g116480.1;Solyc03g120320.1;Solyc05g007895.1;Solyc05g008640.1;Solyc06g073890.3;Solyc07g045190.3
GO:0006749	glutathione metabolic process	4	4/714	57/10829	1.06	0.52367	0.958553	Solyc07g056490.4/Solyc08g080900.3/Solyc09g011590.4/Solyc09g011650.4	Solyc07g056490.4;Solyc08g080900.3;Solyc09g011590.4;Solyc09g011650.4
GO:0051171	regulation of nitrogen compound metabolic process	25	25/714	378/10829	1	0.524258	0.958553	Solyc01g087050.3/Solyc01g091420.2/Solyc02g062670.3/Solyc02g078030.3/Solyc02g092570.1/Solyc02g093910.3/Solyc03g083210.3/Solyc03g095780.3/Solyc03g116480.1/Solyc03g118540.4/Solyc03g120320.1/Solyc03g123400.1/Solyc04g056320.3/Solyc05g009170.3/Solyc07g043330.3/Solyc07g047950.1/Solyc07g063350.3/Solyc07g063850.3/Solyc08g006470.4/Solyc08g082180.3/Solyc09g011030.3/Solyc09g091600.4/Solyc10g076410.1/Solyc11g…	Solyc01g087050.3;Solyc01g091420.2;Solyc02g062670.3;Solyc02g078030.3;Solyc02g092570.1;Solyc02g093910.3;Solyc03g083210.3;Solyc03g095780.3;Solyc03g116480.1;Solyc03g118540.4;Solyc03g120320.1;Solyc03g123400.1;Solyc04g056320.3;Solyc05g009170.3;Solyc07g043330.3;Solyc07g047950.1;Solyc07g063350.3;Solyc07g063850.3;Solyc08g006470.4;Solyc08g082180.3;Solyc09g011030.3;Solyc09g091600.4;Solyc10g076410.1;Solyc11g…
GO:0000725	recombinational repair	1	1/714	11/10829	1.38	0.52794	0.958553	Solyc03g083190.3	Solyc03g083190.3
GO:0002218	activation of innate immune response	1	1/714	11/10829	1.38	0.52794	0.958553	Solyc11g005720.1	Solyc11g005720.1
GO:0006075	(1->3)-beta-D-glucan biosynthetic process	1	1/714	11/10829	1.38	0.52794	0.958553	Solyc02g078230.2	Solyc02g078230.2
GO:0007568	aging	1	1/714	11/10829	1.38	0.52794	0.958553	Solyc06g050760.1	Solyc06g050760.1
GO:0009744	response to sucrose	1	1/714	11/10829	1.38	0.52794	0.958553	Solyc10g081490.2	Solyc10g081490.2
GO:0010200	response to chitin	1	1/714	11/10829	1.38	0.52794	0.958553	Solyc07g045190.3	Solyc07g045190.3
GO:0016143	S-glycoside metabolic process	1	1/714	11/10829	1.38	0.52794	0.958553	Solyc05g009170.3	Solyc05g009170.3
GO:0016554	cytidine to uridine editing	1	1/714	11/10829	1.38	0.52794	0.958553	Solyc05g006460.3	Solyc05g006460.3
GO:0019757	glycosinolate metabolic process	1	1/714	11/10829	1.38	0.52794	0.958553	Solyc05g009170.3	Solyc05g009170.3
GO:0031647	regulation of protein stability	1	1/714	11/10829	1.38	0.52794	0.958553	Solyc03g116390.4	Solyc03g116390.4
GO:0044728	DNA methylation or demethylation	1	1/714	11/10829	1.38	0.52794	0.958553	Solyc03g083210.3	Solyc03g083210.3
GO:0048467	gynoecium development	1	1/714	11/10829	1.38	0.52794	0.958553	Solyc10g083740.3	Solyc10g083740.3
GO:0071368	cellular response to cytokinin stimulus	1	1/714	11/10829	1.38	0.52794	0.958553	Solyc05g009170.3	Solyc05g009170.3
GO:0009658	chloroplast organization	3	3/714	42/10829	1.08	0.529837	0.958553	Solyc02g093940.3/Solyc07g065680.3/Solyc09g091600.4	Solyc02g093940.3;Solyc07g065680.3;Solyc09g091600.4
GO:0010941	regulation of cell death	3	3/714	42/10829	1.08	0.529837	0.958553	Solyc02g080610.4/Solyc03g118200.4/Solyc08g042100.3	Solyc02g080610.4;Solyc03g118200.4;Solyc08g042100.3
GO:1901419	regulation of response to alcohol	3	3/714	42/10829	1.08	0.529837	0.958553	Solyc05g008640.1/Solyc05g009170.3/Solyc07g045190.3	Solyc05g008640.1;Solyc05g009170.3;Solyc07g045190.3
GO:1905957	regulation of cellular response to alcohol	3	3/714	42/10829	1.08	0.529837	0.958553	Solyc05g008640.1/Solyc05g009170.3/Solyc07g045190.3	Solyc05g008640.1;Solyc05g009170.3;Solyc07g045190.3
GO:0032446	protein modification by small protein conjugation	9	9/714	135/10829	1.01	0.536076	0.95894	Solyc03g116480.1/Solyc05g007895.1/Solyc05g008640.1/Solyc06g073890.3/Solyc07g045190.3/Solyc08g042100.3/Solyc08g077100.3/Solyc09g065870.4/Solyc10g007000.3	Solyc03g116480.1;Solyc05g007895.1;Solyc05g008640.1;Solyc06g073890.3;Solyc07g045190.3;Solyc08g042100.3;Solyc08g077100.3;Solyc09g065870.4;Solyc10g007000.3
GO:0000209	protein polyubiquitination	4	4/714	58/10829	1.05	0.537611	0.95894	Solyc05g007895.1/Solyc06g073890.3/Solyc11g065190.3/Solyc12g099310.2	Solyc05g007895.1;Solyc06g073890.3;Solyc11g065190.3;Solyc12g099310.2
GO:0009266	response to temperature stimulus	6	6/714	89/10829	1.02	0.538346	0.95894	Solyc03g116390.4/Solyc03g118200.4/Solyc08g082180.3/Solyc09g011590.4/Solyc09g011650.4/Solyc11g020330.1	Solyc03g116390.4;Solyc03g118200.4;Solyc08g082180.3;Solyc09g011590.4;Solyc09g011650.4;Solyc11g020330.1
GO:0042545	cell wall modification	6	6/714	89/10829	1.02	0.538346	0.95894	Solyc01g098930.3/Solyc02g075620.4/Solyc02g080220.3/Solyc06g034360.2/Solyc07g043240.4/Solyc08g078640.3	Solyc01g098930.3;Solyc02g075620.4;Solyc02g080220.3;Solyc06g034360.2;Solyc07g043240.4;Solyc08g078640.3
GO:0000280	nuclear division	2	2/714	27/10829	1.12	0.539521	0.95894	Solyc01g044558.1/Solyc06g075640.2	Solyc01g044558.1;Solyc06g075640.2
GO:0009789	positive regulation of abscisic acid-activated signaling pathway	2	2/714	27/10829	1.12	0.539521	0.95894	Solyc05g008640.1/Solyc07g045190.3	Solyc05g008640.1;Solyc07g045190.3
GO:0044283	small molecule biosynthetic process	2	2/714	27/10829	1.12	0.539521	0.95894	Solyc02g078410.1/Solyc11g069780.3	Solyc02g078410.1;Solyc11g069780.3
GO:0048527	lateral root development	2	2/714	27/10829	1.12	0.539521	0.95894	Solyc01g091420.2/Solyc06g063270.4	Solyc01g091420.2;Solyc06g063270.4
GO:0048731	system development	18	18/714	274/10829	1	0.54216	0.95894	Solyc01g091420.2/Solyc01g096840.3/Solyc01g107250.3/Solyc02g092480.4/Solyc03g043770.4/Solyc03g044090.4/Solyc03g063140.4/Solyc03g112750.4/Solyc04g077860.4/Solyc05g007895.1/Solyc06g050760.1/Solyc06g063270.4/Solyc06g084320.1/Solyc07g043330.3/Solyc08g023490.4/Solyc09g064820.1/Solyc10g083740.3/Solyc11g010440.3	Solyc01g091420.2;Solyc01g096840.3;Solyc01g107250.3;Solyc02g092480.4;Solyc03g043770.4;Solyc03g044090.4;Solyc03g063140.4;Solyc03g112750.4;Solyc04g077860.4;Solyc05g007895.1;Solyc06g050760.1;Solyc06g063270.4;Solyc06g084320.1;Solyc07g043330.3;Solyc08g023490.4;Solyc09g064820.1;Solyc10g083740.3;Solyc11g010440.3
GO:0032269	negative regulation of cellular protein metabolic process	3	3/714	43/10829	1.06	0.545993	0.95894	Solyc03g095780.3/Solyc08g082180.3/Solyc10g076410.1	Solyc03g095780.3;Solyc08g082180.3;Solyc10g076410.1
GO:0051248	negative regulation of protein metabolic process	3	3/714	43/10829	1.06	0.545993	0.95894	Solyc03g095780.3/Solyc08g082180.3/Solyc10g076410.1	Solyc03g095780.3;Solyc08g082180.3;Solyc10g076410.1
GO:1901135	carbohydrate derivative metabolic process	3	3/714	43/10829	1.06	0.545993	0.95894	Solyc01g087870.4/Solyc01g095670.4/Solyc05g009170.3	Solyc01g087870.4;Solyc01g095670.4;Solyc05g009170.3
GO:1905392	plant organ morphogenesis	4	4/714	59/10829	1.03	0.551344	0.95894	Solyc01g091420.2/Solyc03g112750.4/Solyc06g063270.4/Solyc11g010440.3	Solyc01g091420.2;Solyc03g112750.4;Solyc06g063270.4;Solyc11g010440.3
GO:0009057	macromolecule catabolic process	9	9/714	137/10829	1	0.554166	0.95894	Solyc01g095670.4/Solyc02g093910.3/Solyc03g116480.1/Solyc03g120320.1/Solyc05g007895.1/Solyc05g008640.1/Solyc06g073890.3/Solyc07g045190.3/Solyc12g013750.2	Solyc01g095670.4;Solyc02g093910.3;Solyc03g116480.1;Solyc03g120320.1;Solyc05g007895.1;Solyc05g008640.1;Solyc06g073890.3;Solyc07g045190.3;Solyc12g013750.2
GO:0001708	cell fate specification	1	1/714	12/10829	1.26	0.559097	0.95894	Solyc07g043330.3	Solyc07g043330.3
GO:0002253	activation of immune response	1	1/714	12/10829	1.26	0.559097	0.95894	Solyc11g005720.1	Solyc11g005720.1
GO:0006304	DNA modification	1	1/714	12/10829	1.26	0.559097	0.95894	Solyc03g083210.3	Solyc03g083210.3
GO:0006891	intra-Golgi vesicle-mediated transport	1	1/714	12/10829	1.26	0.559097	0.95894	Solyc03g120260.4	Solyc03g120260.4
GO:0009696	salicylic acid metabolic process	1	1/714	12/10829	1.26	0.559097	0.95894	Solyc01g108780.4	Solyc01g108780.4
GO:0009736	cytokinin-activated signaling pathway	1	1/714	12/10829	1.26	0.559097	0.95894	Solyc05g009170.3	Solyc05g009170.3
GO:0010087	phloem or xylem histogenesis	1	1/714	12/10829	1.26	0.559097	0.95894	Solyc01g091420.2	Solyc01g091420.2
GO:0010252	auxin homeostasis	1	1/714	12/10829	1.26	0.559097	0.95894	Solyc07g063850.3	Solyc07g063850.3
GO:0019760	glucosinolate metabolic process	1	1/714	12/10829	1.26	0.559097	0.95894	Solyc05g009170.3	Solyc05g009170.3
GO:0035966	response to topologically incorrect protein	1	1/714	12/10829	1.26	0.559097	0.95894	Solyc05g007895.1	Solyc05g007895.1
GO:0042176	regulation of protein catabolic process	1	1/714	12/10829	1.26	0.559097	0.95894	Solyc09g011030.3	Solyc09g011030.3
GO:0043433	negative regulation of sequence-specific DNA binding transcription factor activity	1	1/714	12/10829	1.26	0.559097	0.95894	Solyc02g078030.3	Solyc02g078030.3
GO:0051091	positive regulation of sequence-specific DNA binding transcription factor activity	1	1/714	12/10829	1.26	0.559097	0.95894	Solyc01g096510.2	Solyc01g096510.2
GO:0051606	detection of stimulus	1	1/714	12/10829	1.26	0.559097	0.95894	Solyc07g047950.1	Solyc07g047950.1
GO:0055046	microgametogenesis	1	1/714	12/10829	1.26	0.559097	0.95894	Solyc06g073890.3	Solyc06g073890.3
GO:0065001	specification of axis polarity	1	1/714	12/10829	1.26	0.559097	0.95894	Solyc03g063140.4	Solyc03g063140.4
GO:0070973	protein localization to endoplasmic reticulum exit site	1	1/714	12/10829	1.26	0.559097	0.95894	Solyc02g032930.3	Solyc02g032930.3
GO:0071695	anatomical structure maturation	1	1/714	12/10829	1.26	0.559097	0.95894	Solyc11g010440.3	Solyc11g010440.3
GO:0006402	mRNA catabolic process	2	2/714	28/10829	1.08	0.559474	0.95894	Solyc02g086590.3/Solyc10g006190.4	Solyc02g086590.3;Solyc10g006190.4
GO:0031349	positive regulation of defense response	2	2/714	28/10829	1.08	0.559474	0.95894	Solyc03g006050.4/Solyc11g005720.1	Solyc03g006050.4;Solyc11g005720.1
GO:0090697	post-embryonic plant organ morphogenesis	2	2/714	28/10829	1.08	0.559474	0.95894	Solyc01g091420.2/Solyc06g063270.4	Solyc01g091420.2;Solyc06g063270.4
GO:0009787	regulation of abscisic acid-activated signaling pathway	3	3/714	44/10829	1.03	0.56182	0.95894	Solyc05g008640.1/Solyc05g009170.3/Solyc07g045190.3	Solyc05g008640.1;Solyc05g009170.3;Solyc07g045190.3
GO:0019220	regulation of phosphate metabolic process	3	3/714	44/10829	1.03	0.56182	0.95894	Solyc03g095780.3/Solyc08g082180.3/Solyc10g076410.1	Solyc03g095780.3;Solyc08g082180.3;Solyc10g076410.1
GO:0051174	regulation of phosphorus metabolic process	3	3/714	44/10829	1.03	0.56182	0.95894	Solyc03g095780.3/Solyc08g082180.3/Solyc10g076410.1	Solyc03g095780.3;Solyc08g082180.3;Solyc10g076410.1
GO:0051301	cell division	4	4/714	60/10829	1.01	0.564858	0.962693	Solyc01g096840.3/Solyc03g096870.3/Solyc04g076210.3/Solyc08g005420.3	Solyc01g096840.3;Solyc03g096870.3;Solyc04g076210.3;Solyc08g005420.3
GO:0009636	response to toxic substance	5	5/714	76/10829	1	0.568094	0.966771	Solyc03g119980.3/Solyc07g056490.4/Solyc08g080900.3/Solyc09g011590.4/Solyc09g011650.4	Solyc03g119980.3;Solyc07g056490.4;Solyc08g080900.3;Solyc09g011590.4;Solyc09g011650.4
GO:0009735	response to cytokinin	3	3/714	45/10829	1.01	0.577308	0.974868	Solyc05g009170.3/Solyc09g011590.4/Solyc09g011650.4	Solyc05g009170.3;Solyc09g011590.4;Solyc09g011650.4
GO:0048437	floral organ development	3	3/714	45/10829	1.01	0.577308	0.974868	Solyc01g107250.3/Solyc03g043770.4/Solyc03g063140.4	Solyc01g107250.3;Solyc03g043770.4;Solyc03g063140.4
GO:0060560	developmental growth involved in morphogenesis	3	3/714	45/10829	1.01	0.577308	0.974868	Solyc02g080230.3/Solyc05g007895.1/Solyc07g063850.3	Solyc02g080230.3;Solyc05g007895.1;Solyc07g063850.3
GO:0009889	regulation of biosynthetic process	21	21/714	326/10829	0.98	0.577562	0.974868	Solyc01g087050.3/Solyc01g091420.2/Solyc02g062670.3/Solyc02g078030.3/Solyc02g080610.4/Solyc02g092570.1/Solyc03g083210.3/Solyc03g116480.1/Solyc03g118540.4/Solyc03g123400.1/Solyc04g017610.2/Solyc04g056320.3/Solyc05g009170.3/Solyc07g043330.3/Solyc07g047950.1/Solyc07g063350.3/Solyc07g063850.3/Solyc08g006470.4/Solyc09g091600.4/Solyc11g012510.3/Solyc12g049400.2	Solyc01g087050.3;Solyc01g091420.2;Solyc02g062670.3;Solyc02g078030.3;Solyc02g080610.4;Solyc02g092570.1;Solyc03g083210.3;Solyc03g116480.1;Solyc03g118540.4;Solyc03g123400.1;Solyc04g017610.2;Solyc04g056320.3;Solyc05g009170.3;Solyc07g043330.3;Solyc07g047950.1;Solyc07g063350.3;Solyc07g063850.3;Solyc08g006470.4;Solyc09g091600.4;Solyc11g012510.3;Solyc12g049400.2
GO:0009888	tissue development	8	8/714	124/10829	0.98	0.577697	0.974868	Solyc01g091420.2/Solyc01g096840.3/Solyc03g043770.4/Solyc03g112750.4/Solyc04g078650.4/Solyc05g007895.1/Solyc05g009170.3/Solyc11g010440.3	Solyc01g091420.2;Solyc01g096840.3;Solyc03g043770.4;Solyc03g112750.4;Solyc04g078650.4;Solyc05g007895.1;Solyc05g009170.3;Solyc11g010440.3
GO:0021700	developmental maturation	2	2/714	29/10829	1.05	0.578801	0.974868	Solyc01g107250.3/Solyc11g010440.3	Solyc01g107250.3;Solyc11g010440.3
GO:0048528	post-embryonic root development	2	2/714	29/10829	1.05	0.578801	0.974868	Solyc01g091420.2/Solyc06g063270.4	Solyc01g091420.2;Solyc06g063270.4
GO:0009056	catabolic process	14	14/714	218/10829	0.97	0.58083	0.974949	Solyc01g095670.4/Solyc02g093910.3/Solyc03g116480.1/Solyc03g120320.1/Solyc05g007895.1/Solyc05g008640.1/Solyc06g073890.3/Solyc07g045190.3/Solyc07g056490.4/Solyc08g080900.3/Solyc09g011590.4/Solyc09g011650.4/Solyc12g005300.2/Solyc12g013750.2	Solyc01g095670.4;Solyc02g093910.3;Solyc03g116480.1;Solyc03g120320.1;Solyc05g007895.1;Solyc05g008640.1;Solyc06g073890.3;Solyc07g045190.3;Solyc07g056490.4;Solyc08g080900.3;Solyc09g011590.4;Solyc09g011650.4;Solyc12g005300.2;Solyc12g013750.2
GO:0006002	fructose 6-phosphate metabolic process	1	1/714	13/10829	1.17	0.588199	0.974949	Solyc12g095880.2	Solyc12g095880.2
GO:0006535	cysteine biosynthetic process from serine	1	1/714	13/10829	1.17	0.588199	0.974949	Solyc01g094790.3	Solyc01g094790.3
GO:0007030	Golgi organization	1	1/714	13/10829	1.17	0.588199	0.974949	Solyc01g107250.3	Solyc01g107250.3
GO:0009640	photomorphogenesis	1	1/714	13/10829	1.17	0.588199	0.974949	Solyc07g047950.1	Solyc07g047950.1
GO:0009943	adaxial/abaxial axis specification	1	1/714	13/10829	1.17	0.588199	0.974949	Solyc03g063140.4	Solyc03g063140.4
GO:0009955	adaxial/abaxial pattern specification	1	1/714	13/10829	1.17	0.588199	0.974949	Solyc03g063140.4	Solyc03g063140.4
GO:0010150	leaf senescence	1	1/714	13/10829	1.17	0.588199	0.974949	Solyc06g050760.1	Solyc06g050760.1
GO:0044264	cellular polysaccharide metabolic process	1	1/714	13/10829	1.17	0.588199	0.974949	Solyc12g013750.2	Solyc12g013750.2
GO:0051656	establishment of organelle localization	1	1/714	13/10829	1.17	0.588199	0.974949	Solyc07g065680.3	Solyc07g065680.3
GO:1900424	regulation of defense response to bacterium	1	1/714	13/10829	1.17	0.588199	0.974949	Solyc03g006050.4	Solyc03g006050.4
GO:0010033	response to organic substance	21	21/714	328/10829	0.97	0.589125	0.975073	Solyc01g005400.3/Solyc01g044556.1/Solyc01g095580.3/Solyc01g107250.3/Solyc03g095780.3/Solyc03g118540.4/Solyc04g077860.4/Solyc05g007895.1/Solyc05g009170.3/Solyc06g050760.1/Solyc06g084320.1/Solyc07g045190.3/Solyc07g063850.3/Solyc08g082180.3/Solyc09g011590.4/Solyc09g011650.4/Solyc09g064820.1/Solyc09g065870.4/Solyc10g076410.1/Solyc10g083740.3/Solyc12g049400.2	Solyc01g005400.3;Solyc01g044556.1;Solyc01g095580.3;Solyc01g107250.3;Solyc03g095780.3;Solyc03g118540.4;Solyc04g077860.4;Solyc05g007895.1;Solyc05g009170.3;Solyc06g050760.1;Solyc06g084320.1;Solyc07g045190.3;Solyc07g063850.3;Solyc08g082180.3;Solyc09g011590.4;Solyc09g011650.4;Solyc09g064820.1;Solyc09g065870.4;Solyc10g076410.1;Solyc10g083740.3;Solyc12g049400.2
GO:0022412	cellular process involved in reproduction in multicellular organism	3	3/714	46/10829	0.99	0.592447	0.97916	Solyc01g044558.1/Solyc05g007895.1/Solyc06g075640.2	Solyc01g044558.1;Solyc05g007895.1;Solyc06g075640.2
GO:0009733	response to auxin	14	14/714	220/10829	0.97	0.594823	0.981671	Solanum_lycopersicum_newGene_3238/Solyc01g091030.3/Solyc01g095580.3/Solyc01g110920.4/Solyc02g062230.1/Solyc05g056440.3/Solyc07g042490.1/Solyc07g063850.3/Solyc08g079150.1/Solyc09g011590.4/Solyc09g011650.4/Solyc10g052530.1/Solyc10g081490.2/Solyc10g083740.3	--;Solyc01g091030.3;Solyc01g095580.3;Solyc01g110920.4;Solyc02g062230.1;Solyc05g056440.3;Solyc07g042490.1;Solyc07g063850.3;Solyc08g079150.1;Solyc09g011590.4;Solyc09g011650.4;Solyc10g052530.1;Solyc10g081490.2;Solyc10g083740.3
GO:0008283	cell proliferation	2	2/714	30/10829	1.01	0.597499	0.984672	Solanum_lycopersicum_newGene_1690/Solyc01g106830.4	--;Solyc01g106830.4
GO:0051246	regulation of protein metabolic process	6	6/714	95/10829	0.96	0.603158	0.985488	Solyc02g093910.3/Solyc03g095780.3/Solyc03g120320.1/Solyc08g082180.3/Solyc09g011030.3/Solyc10g076410.1	Solyc02g093910.3;Solyc03g095780.3;Solyc03g120320.1;Solyc08g082180.3;Solyc09g011030.3;Solyc10g076410.1
GO:0070647	protein modification by small protein conjugation or removal	9	9/714	143/10829	0.95	0.606598	0.985488	Solyc03g116480.1/Solyc05g007895.1/Solyc05g008640.1/Solyc06g073890.3/Solyc07g045190.3/Solyc08g042100.3/Solyc08g077100.3/Solyc09g065870.4/Solyc10g007000.3	Solyc03g116480.1;Solyc05g007895.1;Solyc05g008640.1;Solyc06g073890.3;Solyc07g045190.3;Solyc08g042100.3;Solyc08g077100.3;Solyc09g065870.4;Solyc10g007000.3
GO:1903506	regulation of nucleic acid-templated transcription	17	17/714	270/10829	0.95	0.614916	0.985488	Solyc01g087050.3/Solyc01g091420.2/Solyc02g062670.3/Solyc02g078030.3/Solyc02g092570.1/Solyc03g083210.3/Solyc03g116480.1/Solyc03g118540.4/Solyc03g123400.1/Solyc04g056320.3/Solyc05g009170.3/Solyc07g043330.3/Solyc07g047950.1/Solyc07g063350.3/Solyc08g006470.4/Solyc11g012510.3/Solyc12g049400.2	Solyc01g087050.3;Solyc01g091420.2;Solyc02g062670.3;Solyc02g078030.3;Solyc02g092570.1;Solyc03g083210.3;Solyc03g116480.1;Solyc03g118540.4;Solyc03g123400.1;Solyc04g056320.3;Solyc05g009170.3;Solyc07g043330.3;Solyc07g047950.1;Solyc07g063350.3;Solyc08g006470.4;Solyc11g012510.3;Solyc12g049400.2
GO:2001141	regulation of RNA biosynthetic process	17	17/714	270/10829	0.95	0.614916	0.985488	Solyc01g087050.3/Solyc01g091420.2/Solyc02g062670.3/Solyc02g078030.3/Solyc02g092570.1/Solyc03g083210.3/Solyc03g116480.1/Solyc03g118540.4/Solyc03g123400.1/Solyc04g056320.3/Solyc05g009170.3/Solyc07g043330.3/Solyc07g047950.1/Solyc07g063350.3/Solyc08g006470.4/Solyc11g012510.3/Solyc12g049400.2	Solyc01g087050.3;Solyc01g091420.2;Solyc02g062670.3;Solyc02g078030.3;Solyc02g092570.1;Solyc03g083210.3;Solyc03g116480.1;Solyc03g118540.4;Solyc03g123400.1;Solyc04g056320.3;Solyc05g009170.3;Solyc07g043330.3;Solyc07g047950.1;Solyc07g063350.3;Solyc08g006470.4;Solyc11g012510.3;Solyc12g049400.2
GO:0002833	positive regulation of response to biotic stimulus	1	1/714	14/10829	1.08	0.615384	0.985488	Solyc03g006050.4	Solyc03g006050.4
GO:0006694	steroid biosynthetic process	1	1/714	14/10829	1.08	0.615384	0.985488	Solyc01g094070.3	Solyc01g094070.3
GO:0009108	coenzyme biosynthetic process	1	1/714	14/10829	1.08	0.615384	0.985488	Solyc02g078410.1	Solyc02g078410.1
GO:0009686	gibberellin biosynthetic process	1	1/714	14/10829	1.08	0.615384	0.985488	Solyc03g006880.3	Solyc03g006880.3
GO:0009944	polarity specification of adaxial/abaxial axis	1	1/714	14/10829	1.08	0.615384	0.985488	Solyc03g063140.4	Solyc03g063140.4
GO:0010305	leaf vascular tissue pattern formation	1	1/714	14/10829	1.08	0.615384	0.985488	Solyc03g112750.4	Solyc03g112750.4
GO:0031398	positive regulation of protein ubiquitination	1	1/714	14/10829	1.08	0.615384	0.985488	Solyc09g011030.3	Solyc09g011030.3
GO:0032350	regulation of hormone metabolic process	1	1/714	14/10829	1.08	0.615384	0.985488	Solyc02g077780.3	Solyc02g077780.3
GO:0034050	host programmed cell death induced by symbiont	1	1/714	14/10829	1.08	0.615384	0.985488	Solyc02g077780.3	Solyc02g077780.3
GO:0046470	phosphatidylcholine metabolic process	1	1/714	14/10829	1.08	0.615384	0.985488	Solyc08g066790.4	Solyc08g066790.4
GO:0051090	regulation of sequence-specific DNA binding transcription factor activity	1	1/714	14/10829	1.08	0.615384	0.985488	Solyc02g078030.3	Solyc02g078030.3
GO:0051223	regulation of protein transport	1	1/714	14/10829	1.08	0.615384	0.985488	Solyc02g082690.3	Solyc02g082690.3
GO:0090087	regulation of peptide transport	1	1/714	14/10829	1.08	0.615384	0.985488	Solyc02g082690.3	Solyc02g082690.3
GO:1903322	positive regulation of protein modification by small protein conjugation or removal	1	1/714	14/10829	1.08	0.615384	0.985488	Solyc09g011030.3	Solyc09g011030.3
GO:0048285	organelle fission	2	2/714	31/10829	0.98	0.615567	0.985488	Solyc01g044558.1/Solyc06g075640.2	Solyc01g044558.1;Solyc06g075640.2
GO:0048438	floral whorl development	2	2/714	31/10829	0.98	0.615567	0.985488	Solyc03g063140.4/Solyc10g083740.3	Solyc03g063140.4;Solyc10g083740.3
GO:0048827	phyllome development	4	4/714	64/10829	0.95	0.61658	0.985488	Solyc03g063140.4/Solyc03g112750.4/Solyc06g050760.1/Solyc07g043330.3	Solyc03g063140.4;Solyc03g112750.4;Solyc06g050760.1;Solyc07g043330.3
GO:0061458	reproductive system development	11	11/714	176/10829	0.95	0.617562	0.985488	Solyc01g096840.3/Solyc01g107250.3/Solyc02g092480.4/Solyc03g043770.4/Solyc03g044090.4/Solyc03g063140.4/Solyc05g007895.1/Solyc06g084320.1/Solyc08g023490.4/Solyc09g064820.1/Solyc10g083740.3	Solyc01g096840.3;Solyc01g107250.3;Solyc02g092480.4;Solyc03g043770.4;Solyc03g044090.4;Solyc03g063140.4;Solyc05g007895.1;Solyc06g084320.1;Solyc08g023490.4;Solyc09g064820.1;Solyc10g083740.3
GO:0050794	regulation of cellular process	44	44/714	692/10829	0.96	0.62503	0.985488	Solyc01g044558.1/Solyc01g087050.3/Solyc01g091420.2/Solyc01g107250.3/Solyc02g062670.3/Solyc02g077780.3/Solyc02g078030.3/Solyc02g080610.4/Solyc02g082690.3/Solyc02g092570.1/Solyc03g083210.3/Solyc03g095780.3/Solyc03g116480.1/Solyc03g118200.4/Solyc03g118540.4/Solyc03g120320.1/Solyc03g123400.1/Solyc04g017610.2/Solyc04g056320.3/Solyc05g008640.1/Solyc05g009170.3/Solyc06g063270.4/Solyc06g073890.3/Solyc06g…	Solyc01g044558.1;Solyc01g087050.3;Solyc01g091420.2;Solyc01g107250.3;Solyc02g062670.3;Solyc02g077780.3;Solyc02g078030.3;Solyc02g080610.4;Solyc02g082690.3;Solyc02g092570.1;Solyc03g083210.3;Solyc03g095780.3;Solyc03g116480.1;Solyc03g118200.4;Solyc03g118540.4;Solyc03g120320.1;Solyc03g123400.1;Solyc04g017610.2;Solyc04g056320.3;Solyc05g008640.1;Solyc05g009170.3;Solyc06g063270.4;Solyc06g073890.3;Solyc06g…
GO:0048608	reproductive structure development	11	11/714	177/10829	0.94	0.62512	0.985488	Solyc01g096840.3/Solyc01g107250.3/Solyc02g092480.4/Solyc03g043770.4/Solyc03g044090.4/Solyc03g063140.4/Solyc05g007895.1/Solyc06g084320.1/Solyc08g023490.4/Solyc09g064820.1/Solyc10g083740.3	Solyc01g096840.3;Solyc01g107250.3;Solyc02g092480.4;Solyc03g043770.4;Solyc03g044090.4;Solyc03g063140.4;Solyc05g007895.1;Solyc06g084320.1;Solyc08g023490.4;Solyc09g064820.1;Solyc10g083740.3
GO:0065007	biological regulation	56	56/714	879/10829	0.97	0.630422	0.985488	Solyc01g044558.1/Solyc01g087050.3/Solyc01g091420.2/Solyc01g107250.3/Solyc02g062670.3/Solyc02g077780.3/Solyc02g078030.3/Solyc02g080610.4/Solyc02g082690.3/Solyc02g092570.1/Solyc02g093910.3/Solyc03g006050.4/Solyc03g043770.4/Solyc03g083210.3/Solyc03g095780.3/Solyc03g098460.3/Solyc03g112750.4/Solyc03g116390.4/Solyc03g116480.1/Solyc03g118200.4/Solyc03g118540.4/Solyc03g120320.1/Solyc03g123400.1/Solyc04g…	Solyc01g044558.1;Solyc01g087050.3;Solyc01g091420.2;Solyc01g107250.3;Solyc02g062670.3;Solyc02g077780.3;Solyc02g078030.3;Solyc02g080610.4;Solyc02g082690.3;Solyc02g092570.1;Solyc02g093910.3;Solyc03g006050.4;Solyc03g043770.4;Solyc03g083210.3;Solyc03g095780.3;Solyc03g098460.3;Solyc03g112750.4;Solyc03g116390.4;Solyc03g116480.1;Solyc03g118200.4;Solyc03g118540.4;Solyc03g120320.1;Solyc03g123400.1;Solyc04g…
GO:0080090	regulation of primary metabolic process	25	25/714	398/10829	0.95	0.630803	0.985488	Solyc01g087050.3/Solyc01g091420.2/Solyc02g062670.3/Solyc02g078030.3/Solyc02g092570.1/Solyc02g093910.3/Solyc03g083210.3/Solyc03g095780.3/Solyc03g116480.1/Solyc03g118540.4/Solyc03g120320.1/Solyc03g123400.1/Solyc04g017610.2/Solyc04g056320.3/Solyc05g009170.3/Solyc07g043330.3/Solyc07g047950.1/Solyc07g063350.3/Solyc08g006470.4/Solyc08g082180.3/Solyc09g011030.3/Solyc09g091600.4/Solyc10g076410.1/Solyc11g…	Solyc01g087050.3;Solyc01g091420.2;Solyc02g062670.3;Solyc02g078030.3;Solyc02g092570.1;Solyc02g093910.3;Solyc03g083210.3;Solyc03g095780.3;Solyc03g116480.1;Solyc03g118540.4;Solyc03g120320.1;Solyc03g123400.1;Solyc04g017610.2;Solyc04g056320.3;Solyc05g009170.3;Solyc07g043330.3;Solyc07g047950.1;Solyc07g063350.3;Solyc08g006470.4;Solyc08g082180.3;Solyc09g011030.3;Solyc09g091600.4;Solyc10g076410.1;Solyc11g…
GO:0009553	embryo sac development	2	2/714	32/10829	0.95	0.633006	0.985488	Solyc06g073890.3/Solyc07g005800.2	Solyc06g073890.3;Solyc07g005800.2
GO:0042981	regulation of apoptotic process	2	2/714	32/10829	0.95	0.633006	0.985488	Solyc02g080610.4/Solyc08g042100.3	Solyc02g080610.4;Solyc08g042100.3
GO:0048878	chemical homeostasis	2	2/714	32/10829	0.95	0.633006	0.985488	Solyc07g032170.3/Solyc07g063850.3	Solyc07g032170.3;Solyc07g063850.3
GO:0060627	regulation of vesicle-mediated transport	2	2/714	32/10829	0.95	0.633006	0.985488	Solyc02g082690.3/Solyc07g049580.3	Solyc02g082690.3;Solyc07g049580.3
GO:0003006	developmental process involved in reproduction	14	14/714	226/10829	0.94	0.635524	0.985488	Solyc01g044558.1/Solyc01g096840.3/Solyc01g107250.3/Solyc02g080230.3/Solyc02g092480.4/Solyc03g043770.4/Solyc03g044090.4/Solyc03g063140.4/Solyc05g007895.1/Solyc06g075640.2/Solyc06g084320.1/Solyc08g023490.4/Solyc09g064820.1/Solyc10g083740.3	Solyc01g044558.1;Solyc01g096840.3;Solyc01g107250.3;Solyc02g080230.3;Solyc02g092480.4;Solyc03g043770.4;Solyc03g044090.4;Solyc03g063140.4;Solyc05g007895.1;Solyc06g075640.2;Solyc06g084320.1;Solyc08g023490.4;Solyc09g064820.1;Solyc10g083740.3
GO:0031326	regulation of cellular biosynthetic process	20	20/714	321/10829	0.94	0.637941	0.985488	Solyc01g087050.3/Solyc01g091420.2/Solyc02g062670.3/Solyc02g078030.3/Solyc02g092570.1/Solyc03g083210.3/Solyc03g116480.1/Solyc03g118540.4/Solyc03g123400.1/Solyc04g017610.2/Solyc04g056320.3/Solyc05g009170.3/Solyc07g043330.3/Solyc07g047950.1/Solyc07g063350.3/Solyc07g063850.3/Solyc08g006470.4/Solyc09g091600.4/Solyc11g012510.3/Solyc12g049400.2	Solyc01g087050.3;Solyc01g091420.2;Solyc02g062670.3;Solyc02g078030.3;Solyc02g092570.1;Solyc03g083210.3;Solyc03g116480.1;Solyc03g118540.4;Solyc03g123400.1;Solyc04g017610.2;Solyc04g056320.3;Solyc05g009170.3;Solyc07g043330.3;Solyc07g047950.1;Solyc07g063350.3;Solyc07g063850.3;Solyc08g006470.4;Solyc09g091600.4;Solyc11g012510.3;Solyc12g049400.2
GO:0001666	response to hypoxia	1	1/714	15/10829	1.01	0.640776	0.985488	Solyc07g040690.3	Solyc07g040690.3
GO:0006306	DNA methylation	1	1/714	15/10829	1.01	0.640776	0.985488	Solyc03g083210.3	Solyc03g083210.3
GO:0008285	negative regulation of cell proliferation	1	1/714	15/10829	1.01	0.640776	0.985488	Solyc06g063270.4	Solyc06g063270.4
GO:0009742	brassinosteroid mediated signaling pathway	1	1/714	15/10829	1.01	0.640776	0.985488	Solyc01g107250.3	Solyc01g107250.3
GO:0009914	hormone transport	1	1/714	15/10829	1.01	0.640776	0.985488	Solyc03g112750.4	Solyc03g112750.4
GO:0010114	response to red light	1	1/714	15/10829	1.01	0.640776	0.985488	Solyc08g081840.3	Solyc08g081840.3
GO:0032103	positive regulation of response to external stimulus	1	1/714	15/10829	1.01	0.640776	0.985488	Solyc03g006050.4	Solyc03g006050.4
GO:0044262	cellular carbohydrate metabolic process	1	1/714	15/10829	1.01	0.640776	0.985488	Solyc12g013750.2	Solyc12g013750.2
GO:0044772	mitotic cell cycle phase transition	1	1/714	15/10829	1.01	0.640776	0.985488	Solyc02g082820.3	Solyc02g082820.3
GO:0046323	glucose import	1	1/714	15/10829	1.01	0.640776	0.985488	Solyc07g006970.4	Solyc07g006970.4
GO:0050777	negative regulation of immune response	1	1/714	15/10829	1.01	0.640776	0.985488	Solyc08g042100.3	Solyc08g042100.3
GO:0060918	auxin transport	1	1/714	15/10829	1.01	0.640776	0.985488	Solyc03g112750.4	Solyc03g112750.4
GO:0065002	intracellular protein transmembrane transport	1	1/714	15/10829	1.01	0.640776	0.985488	Solyc01g060070.3	Solyc01g060070.3
GO:0070201	regulation of establishment of protein localization	1	1/714	15/10829	1.01	0.640776	0.985488	Solyc02g082690.3	Solyc02g082690.3
GO:0071806	protein transmembrane transport	1	1/714	15/10829	1.01	0.640776	0.985488	Solyc01g060070.3	Solyc01g060070.3
GO:1901136	carbohydrate derivative catabolic process	1	1/714	15/10829	1.01	0.640776	0.985488	Solyc01g095670.4	Solyc01g095670.4
GO:1903320	regulation of protein modification by small protein conjugation or removal	1	1/714	15/10829	1.01	0.640776	0.985488	Solyc09g011030.3	Solyc09g011030.3
GO:0009620	response to fungus	4	4/714	66/10829	0.92	0.640954	0.985488	Solyc02g062670.3/Solyc06g050760.1/Solyc08g080670.1/Solyc12g005300.2	Solyc02g062670.3;Solyc06g050760.1;Solyc08g080670.1;Solyc12g005300.2
GO:0019222	regulation of metabolic process	28	28/714	448/10829	0.95	0.645885	0.985995	Solyc01g087050.3/Solyc01g091420.2/Solyc02g062670.3/Solyc02g077780.3/Solyc02g078030.3/Solyc02g080610.4/Solyc02g092570.1/Solyc02g093910.3/Solyc03g083210.3/Solyc03g095780.3/Solyc03g116480.1/Solyc03g118540.4/Solyc03g120320.1/Solyc03g123400.1/Solyc04g017610.2/Solyc04g056320.3/Solyc05g009170.3/Solyc07g043330.3/Solyc07g047950.1/Solyc07g063350.3/Solyc07g063850.3/Solyc08g006470.4/Solyc08g082180.3/Solyc09g…	Solyc01g087050.3;Solyc01g091420.2;Solyc02g062670.3;Solyc02g077780.3;Solyc02g078030.3;Solyc02g080610.4;Solyc02g092570.1;Solyc02g093910.3;Solyc03g083210.3;Solyc03g095780.3;Solyc03g116480.1;Solyc03g118540.4;Solyc03g120320.1;Solyc03g123400.1;Solyc04g017610.2;Solyc04g056320.3;Solyc05g009170.3;Solyc07g043330.3;Solyc07g047950.1;Solyc07g063350.3;Solyc07g063850.3;Solyc08g006470.4;Solyc08g082180.3;Solyc09g…
GO:0032989	cellular component morphogenesis	4	4/714	67/10829	0.91	0.652754	0.985995	Solyc02g080230.3/Solyc05g007895.1/Solyc05g009170.3/Solyc07g063850.3	Solyc02g080230.3;Solyc05g007895.1;Solyc05g009170.3;Solyc07g063850.3
GO:0048869	cellular developmental process	9	9/714	149/10829	0.92	0.655785	0.985995	Solyc01g044558.1/Solyc01g107250.3/Solyc02g080230.3/Solyc05g007895.1/Solyc05g009170.3/Solyc06g075640.2/Solyc07g043330.3/Solyc07g063850.3/Solyc11g010440.3	Solyc01g044558.1;Solyc01g107250.3;Solyc02g080230.3;Solyc05g007895.1;Solyc05g009170.3;Solyc06g075640.2;Solyc07g043330.3;Solyc07g063850.3;Solyc11g010440.3
GO:0008150	biological_process	117	117/714	1829/10829	0.97	0.660876	0.985995	Solyc01g005400.3/Solyc01g007267.1/Solyc01g044556.1/Solyc01g044558.1/Solyc01g060070.3/Solyc01g087050.3/Solyc01g088490.3/Solyc01g091420.2/Solyc01g095580.3/Solyc01g095670.4/Solyc01g096840.3/Solyc01g107250.3/Solyc02g062670.3/Solyc02g069500.1/Solyc02g071830.3/Solyc02g072010.3/Solyc02g077780.3/Solyc02g078030.3/Solyc02g078410.1/Solyc02g080230.3/Solyc02g080610.4/Solyc02g082690.3/Solyc02g085650.4/Solyc02g…	Solyc01g005400.3;Solyc01g007267.1;Solyc01g044556.1;Solyc01g044558.1;Solyc01g060070.3;Solyc01g087050.3;Solyc01g088490.3;Solyc01g091420.2;Solyc01g095580.3;Solyc01g095670.4;Solyc01g096840.3;Solyc01g107250.3;Solyc02g062670.3;Solyc02g069500.1;Solyc02g071830.3;Solyc02g072010.3;Solyc02g077780.3;Solyc02g078030.3;Solyc02g078410.1;Solyc02g080230.3;Solyc02g080610.4;Solyc02g082690.3;Solyc02g085650.4;Solyc02g…
GO:0009409	response to cold	3	3/714	51/10829	0.89	0.66272	0.985995	Solyc03g116390.4/Solyc08g082180.3/Solyc10g081490.2	Solyc03g116390.4;Solyc08g082180.3;Solyc10g081490.2
GO:0005985	sucrose metabolic process	1	1/714	16/10829	0.95	0.664494	0.985995	Solyc07g042550.3	Solyc07g042550.3
GO:0006559	L-phenylalanine catabolic process	1	1/714	16/10829	0.95	0.664494	0.985995	Solyc09g007910.4	Solyc09g007910.4
GO:0006873	cellular ion homeostasis	1	1/714	16/10829	0.95	0.664494	0.985995	Solyc12g006700.3	Solyc12g006700.3
GO:0008361	regulation of cell size	1	1/714	16/10829	0.95	0.664494	0.985995	Solyc03g118200.4	Solyc03g118200.4
GO:0009165	nucleotide biosynthetic process	1	1/714	16/10829	0.95	0.664494	0.985995	Solyc10g007760.4	Solyc10g007760.4
GO:0009740	gibberellic acid mediated signaling pathway	1	1/714	16/10829	0.95	0.664494	0.985995	Solyc05g009170.3	Solyc05g009170.3
GO:0009860	pollen tube growth	1	1/714	16/10829	0.95	0.664494	0.985995	Solyc02g080230.3	Solyc02g080230.3
GO:0009932	cell tip growth	1	1/714	16/10829	0.95	0.664494	0.985995	Solyc02g080230.3	Solyc02g080230.3
GO:0010051	xylem and phloem pattern formation	1	1/714	16/10829	0.95	0.664494	0.985995	Solyc03g112750.4	Solyc03g112750.4
GO:0010476	gibberellin mediated signaling pathway	1	1/714	16/10829	0.95	0.664494	0.985995	Solyc05g009170.3	Solyc05g009170.3
GO:0010675	regulation of cellular carbohydrate metabolic process	1	1/714	16/10829	0.95	0.664494	0.985995	Solyc09g091600.4	Solyc09g091600.4
GO:0015995	chlorophyll biosynthetic process	1	1/714	16/10829	0.95	0.664494	0.985995	Solyc07g063350.3	Solyc07g063350.3
GO:0023014	signal transduction by protein phosphorylation	1	1/714	16/10829	0.95	0.664494	0.985995	Solyc03g097920.1	Solyc03g097920.1
GO:0031098	stress-activated protein kinase signaling cascade	1	1/714	16/10829	0.95	0.664494	0.985995	Solyc03g097920.1	Solyc03g097920.1
GO:0031396	regulation of protein ubiquitination	1	1/714	16/10829	0.95	0.664494	0.985995	Solyc09g011030.3	Solyc09g011030.3
GO:0043902	positive regulation of multi-organism process	1	1/714	16/10829	0.95	0.664494	0.985995	Solyc03g006050.4	Solyc03g006050.4
GO:0046148	pigment biosynthetic process	1	1/714	16/10829	0.95	0.664494	0.985995	Solyc07g063350.3	Solyc07g063350.3
GO:0050821	protein stabilization	1	1/714	16/10829	0.95	0.664494	0.985995	Solyc03g116390.4	Solyc03g116390.4
GO:0051050	positive regulation of transport	1	1/714	16/10829	0.95	0.664494	0.985995	Solyc02g082690.3	Solyc02g082690.3
GO:0071370	cellular response to gibberellin stimulus	1	1/714	16/10829	0.95	0.664494	0.985995	Solyc05g009170.3	Solyc05g009170.3
GO:1901420	negative regulation of response to alcohol	1	1/714	16/10829	0.95	0.664494	0.985995	Solyc05g009170.3	Solyc05g009170.3
GO:1905958	negative regulation of cellular response to alcohol	1	1/714	16/10829	0.95	0.664494	0.985995	Solyc05g009170.3	Solyc05g009170.3
GO:1901575	organic substance catabolic process	10	10/714	167/10829	0.91	0.669832	0.991964	Solyc01g095670.4/Solyc02g093910.3/Solyc03g116480.1/Solyc03g120320.1/Solyc05g007895.1/Solyc05g008640.1/Solyc06g073890.3/Solyc07g045190.3/Solyc12g005300.2/Solyc12g013750.2	Solyc01g095670.4;Solyc02g093910.3;Solyc03g116480.1;Solyc03g120320.1;Solyc05g007895.1;Solyc05g008640.1;Solyc06g073890.3;Solyc07g045190.3;Solyc12g005300.2;Solyc12g013750.2
GO:0006355	regulation of transcription, DNA-templated	53	53/714	844/10829	0.95	0.670246	0.991964	Solyc01g073910.4/Solyc01g087050.3/Solyc01g090460.3/Solyc01g091420.2/Solyc01g100200.3/Solyc01g100220.3/Solyc02g036430.2/Solyc02g062670.3/Solyc02g062690.3/Solyc02g078030.3/Solyc02g083750.1/Solyc02g092570.1/Solyc02g092910.3/Solyc02g093420.4/Solyc02g093940.3/Solyc03g034000.3/Solyc03g078120.4/Solyc03g083210.3/Solyc03g111710.3/Solyc03g116480.1/Solyc03g117390.3/Solyc03g123400.1/Solyc04g015960.3/Solyc04g…	Solyc01g073910.4;Solyc01g087050.3;Solyc01g090460.3;Solyc01g091420.2;Solyc01g100200.3;Solyc01g100220.3;Solyc02g036430.2;Solyc02g062670.3;Solyc02g062690.3;Solyc02g078030.3;Solyc02g083750.1;Solyc02g092570.1;Solyc02g092910.3;Solyc02g093420.4;Solyc02g093940.3;Solyc03g034000.3;Solyc03g078120.4;Solyc03g083210.3;Solyc03g111710.3;Solyc03g116480.1;Solyc03g117390.3;Solyc03g123400.1;Solyc04g015960.3;Solyc04g…
GO:0042744	hydrogen peroxide catabolic process	7	7/714	119/10829	0.89	0.676769	0.993172	Solyc01g104860.3/Solyc02g090450.3/Solyc02g092580.3/Solyc04g071890.3/Solyc08g069040.3/Solyc11g018772.1/Solyc11g018805.1	Solyc01g104860.3;Solyc02g090450.3;Solyc02g092580.3;Solyc04g071890.3;Solyc08g069040.3;Solyc11g018772.1;Solyc11g018805.1
GO:0032502	developmental process	28	28/714	455/10829	0.93	0.678151	0.993172	Solyc01g044558.1/Solyc01g091420.2/Solyc01g096840.3/Solyc01g107250.3/Solyc02g080230.3/Solyc02g092480.4/Solyc03g043770.4/Solyc03g044090.4/Solyc03g063140.4/Solyc03g112750.4/Solyc04g077860.4/Solyc05g007895.1/Solyc05g009170.3/Solyc06g050760.1/Solyc06g063270.4/Solyc06g073890.3/Solyc06g075640.2/Solyc06g084320.1/Solyc07g043330.3/Solyc07g047950.1/Solyc07g063850.3/Solyc08g023490.4/Solyc08g082180.3/Solyc08g…	Solyc01g044558.1;Solyc01g091420.2;Solyc01g096840.3;Solyc01g107250.3;Solyc02g080230.3;Solyc02g092480.4;Solyc03g043770.4;Solyc03g044090.4;Solyc03g063140.4;Solyc03g112750.4;Solyc04g077860.4;Solyc05g007895.1;Solyc05g009170.3;Solyc06g050760.1;Solyc06g063270.4;Solyc06g073890.3;Solyc06g075640.2;Solyc06g084320.1;Solyc07g043330.3;Solyc07g047950.1;Solyc07g063850.3;Solyc08g023490.4;Solyc08g082180.3;Solyc08g…
GO:0007275	multicellular organism development	24	24/714	392/10829	0.93	0.678932	0.993172	Solyc01g044558.1/Solyc01g091420.2/Solyc01g096840.3/Solyc01g107250.3/Solyc02g092480.4/Solyc03g043770.4/Solyc03g044090.4/Solyc03g063140.4/Solyc03g112750.4/Solyc04g077860.4/Solyc05g007895.1/Solyc06g050760.1/Solyc06g063270.4/Solyc06g073890.3/Solyc06g075640.2/Solyc06g084320.1/Solyc07g043330.3/Solyc07g047950.1/Solyc08g023490.4/Solyc08g082180.3/Solyc09g064820.1/Solyc10g009420.3/Solyc10g083740.3/Solyc11g…	Solyc01g044558.1;Solyc01g091420.2;Solyc01g096840.3;Solyc01g107250.3;Solyc02g092480.4;Solyc03g043770.4;Solyc03g044090.4;Solyc03g063140.4;Solyc03g112750.4;Solyc04g077860.4;Solyc05g007895.1;Solyc06g050760.1;Solyc06g063270.4;Solyc06g073890.3;Solyc06g075640.2;Solyc06g084320.1;Solyc07g043330.3;Solyc07g047950.1;Solyc08g023490.4;Solyc08g082180.3;Solyc09g064820.1;Solyc10g009420.3;Solyc10g083740.3;Solyc11g…
GO:0010556	regulation of macromolecule biosynthetic process	18	18/714	297/10829	0.92	0.680327	0.993172	Solyc01g087050.3/Solyc01g091420.2/Solyc02g062670.3/Solyc02g078030.3/Solyc02g080610.4/Solyc02g092570.1/Solyc03g083210.3/Solyc03g116480.1/Solyc03g118540.4/Solyc03g123400.1/Solyc04g056320.3/Solyc05g009170.3/Solyc07g043330.3/Solyc07g047950.1/Solyc07g063350.3/Solyc08g006470.4/Solyc11g012510.3/Solyc12g049400.2	Solyc01g087050.3;Solyc01g091420.2;Solyc02g062670.3;Solyc02g078030.3;Solyc02g080610.4;Solyc02g092570.1;Solyc03g083210.3;Solyc03g116480.1;Solyc03g118540.4;Solyc03g123400.1;Solyc04g056320.3;Solyc05g009170.3;Solyc07g043330.3;Solyc07g047950.1;Solyc07g063350.3;Solyc08g006470.4;Solyc11g012510.3;Solyc12g049400.2
GO:0043547	positive regulation of GTPase activity	2	2/714	35/10829	0.87	0.681602	0.993172	Solyc02g082690.3/Solyc07g049580.3	Solyc02g082690.3;Solyc07g049580.3
GO:0071365	cellular response to auxin stimulus	2	2/714	35/10829	0.87	0.681602	0.993172	Solyc07g063850.3/Solyc10g083740.3	Solyc07g063850.3;Solyc10g083740.3
GO:0000902	cell morphogenesis	4	4/714	70/10829	0.87	0.686575	0.993172	Solyc02g080230.3/Solyc05g007895.1/Solyc05g009170.3/Solyc07g063850.3	Solyc02g080230.3;Solyc05g007895.1;Solyc05g009170.3;Solyc07g063850.3
GO:0006313	transposition, DNA-mediated	1	1/714	17/10829	0.89	0.686648	0.993172	Solyc07g026705.1	Solyc07g026705.1
GO:0006732	coenzyme metabolic process	1	1/714	17/10829	0.89	0.686648	0.993172	Solyc02g078410.1	Solyc02g078410.1
GO:0007062	sister chromatid cohesion	1	1/714	17/10829	0.89	0.686648	0.993172	Solyc01g086690.2	Solyc01g086690.2
GO:0009626	plant-type hypersensitive response	1	1/714	17/10829	0.89	0.686648	0.993172	Solyc02g077780.3	Solyc02g077780.3
GO:0009788	negative regulation of abscisic acid-activated signaling pathway	1	1/714	17/10829	0.89	0.686648	0.993172	Solyc05g009170.3	Solyc05g009170.3
GO:0010374	stomatal complex development	1	1/714	17/10829	0.89	0.686648	0.993172	Solyc05g051545.1	Solyc05g051545.1
GO:0015743	malate transport	1	1/714	17/10829	0.89	0.686648	0.993172	Solyc03g096820.4	Solyc03g096820.4
GO:0015914	phospholipid transport	1	1/714	17/10829	0.89	0.686648	0.993172	Solyc01g096930.3	Solyc01g096930.3
GO:0048469	cell maturation	1	1/714	17/10829	0.89	0.686648	0.993172	Solyc11g010440.3	Solyc11g010440.3
GO:0051640	organelle localization	1	1/714	17/10829	0.89	0.686648	0.993172	Solyc07g065680.3	Solyc07g065680.3
GO:0090626	plant epidermis morphogenesis	1	1/714	17/10829	0.89	0.686648	0.993172	Solyc05g009170.3	Solyc05g009170.3
GO:0048646	anatomical structure formation involved in morphogenesis	3	3/714	53/10829	0.86	0.688245	0.994228	Solyc01g091420.2/Solyc01g096840.3/Solyc04g077860.4	Solyc01g091420.2;Solyc01g096840.3;Solyc04g077860.4
GO:0051707	response to other organism	8	8/714	137/10829	0.89	0.689534	0.994837	Solyc01g095670.4/Solyc02g062670.3/Solyc03g006050.4/Solyc06g050760.1/Solyc08g042100.3/Solyc08g080670.1/Solyc09g065870.4/Solyc12g005300.2	Solyc01g095670.4;Solyc02g062670.3;Solyc03g006050.4;Solyc06g050760.1;Solyc08g042100.3;Solyc08g080670.1;Solyc09g065870.4;Solyc12g005300.2
GO:0048856	anatomical structure development	26	26/714	427/10829	0.92	0.694463	0.995806	Solyc01g044558.1/Solyc01g091420.2/Solyc01g096840.3/Solyc01g107250.3/Solyc02g080230.3/Solyc02g092480.4/Solyc03g043770.4/Solyc03g044090.4/Solyc03g063140.4/Solyc03g112750.4/Solyc04g077860.4/Solyc05g007895.1/Solyc05g009170.3/Solyc06g050760.1/Solyc06g063270.4/Solyc06g073890.3/Solyc06g075640.2/Solyc06g084320.1/Solyc07g043330.3/Solyc07g047950.1/Solyc07g063850.3/Solyc08g023490.4/Solyc08g082180.3/Solyc09g…	Solyc01g044558.1;Solyc01g091420.2;Solyc01g096840.3;Solyc01g107250.3;Solyc02g080230.3;Solyc02g092480.4;Solyc03g043770.4;Solyc03g044090.4;Solyc03g063140.4;Solyc03g112750.4;Solyc04g077860.4;Solyc05g007895.1;Solyc05g009170.3;Solyc06g050760.1;Solyc06g063270.4;Solyc06g073890.3;Solyc06g075640.2;Solyc06g084320.1;Solyc07g043330.3;Solyc07g047950.1;Solyc07g063850.3;Solyc08g023490.4;Solyc08g082180.3;Solyc09g…
GO:0010016	shoot system morphogenesis	2	2/714	36/10829	0.84	0.696589	0.995806	Solyc03g112750.4/Solyc04g077860.4	Solyc03g112750.4;Solyc04g077860.4
GO:0010228	vegetative to reproductive phase transition of meristem	2	2/714	36/10829	0.84	0.696589	0.995806	Solyc06g084320.1/Solyc09g064820.1	Solyc06g084320.1;Solyc09g064820.1
GO:0043087	regulation of GTPase activity	2	2/714	36/10829	0.84	0.696589	0.995806	Solyc02g082690.3/Solyc07g049580.3	Solyc02g082690.3;Solyc07g049580.3
GO:0044281	small molecule metabolic process	5	5/714	88/10829	0.86	0.697411	0.995806	Solyc02g078410.1/Solyc03g098460.3/Solyc05g009170.3/Solyc07g045190.3/Solyc11g069780.3	Solyc02g078410.1;Solyc03g098460.3;Solyc05g009170.3;Solyc07g045190.3;Solyc11g069780.3
GO:0032501	multicellular organismal process	24	24/714	396/10829	0.92	0.697906	0.995806	Solyc01g044558.1/Solyc01g091420.2/Solyc01g096840.3/Solyc01g107250.3/Solyc02g080230.3/Solyc02g092480.4/Solyc03g043770.4/Solyc03g044090.4/Solyc03g063140.4/Solyc03g112750.4/Solyc04g077860.4/Solyc05g007895.1/Solyc06g050760.1/Solyc06g063270.4/Solyc06g073890.3/Solyc06g075640.2/Solyc06g084320.1/Solyc07g043330.3/Solyc07g047950.1/Solyc08g023490.4/Solyc08g082180.3/Solyc09g064820.1/Solyc10g083740.3/Solyc11g…	Solyc01g044558.1;Solyc01g091420.2;Solyc01g096840.3;Solyc01g107250.3;Solyc02g080230.3;Solyc02g092480.4;Solyc03g043770.4;Solyc03g044090.4;Solyc03g063140.4;Solyc03g112750.4;Solyc04g077860.4;Solyc05g007895.1;Solyc06g050760.1;Solyc06g063270.4;Solyc06g073890.3;Solyc06g075640.2;Solyc06g084320.1;Solyc07g043330.3;Solyc07g047950.1;Solyc08g023490.4;Solyc08g082180.3;Solyc09g064820.1;Solyc10g083740.3;Solyc11g…
GO:1901576	organic substance biosynthetic process	9	9/714	155/10829	0.88	0.70126	0.995806	Solyc01g087050.3/Solyc02g078410.1/Solyc04g077860.4/Solyc07g063350.3/Solyc07g063850.3/Solyc10g052510.2/Solyc10g078660.2/Solyc10g083740.3/Solyc11g069780.3	Solyc01g087050.3;Solyc02g078410.1;Solyc04g077860.4;Solyc07g063350.3;Solyc07g063850.3;Solyc10g052510.2;Solyc10g078660.2;Solyc10g083740.3;Solyc11g069780.3
GO:0043207	response to external biotic stimulus	8	8/714	139/10829	0.87	0.704969	0.995806	Solyc01g095670.4/Solyc02g062670.3/Solyc03g006050.4/Solyc06g050760.1/Solyc08g042100.3/Solyc08g080670.1/Solyc09g065870.4/Solyc12g005300.2	Solyc01g095670.4;Solyc02g062670.3;Solyc03g006050.4;Solyc06g050760.1;Solyc08g042100.3;Solyc08g080670.1;Solyc09g065870.4;Solyc12g005300.2
GO:0006950	response to stress	24	24/714	398/10829	0.91	0.707155	0.995806	Solyc01g005400.3/Solyc01g095670.4/Solyc02g077780.3/Solyc03g083190.3/Solyc03g116390.4/Solyc03g118540.4/Solyc03g119980.3/Solyc03g120290.3/Solyc05g007895.1/Solyc05g008640.1/Solyc06g050760.1/Solyc06g084320.1/Solyc07g045190.3/Solyc08g042100.3/Solyc08g080670.1/Solyc08g082180.3/Solyc09g011590.4/Solyc09g011650.4/Solyc09g064820.1/Solyc09g065870.4/Solyc09g091600.4/Solyc11g020330.1/Solyc12g005300.2/Solyc12g…	Solyc01g005400.3;Solyc01g095670.4;Solyc02g077780.3;Solyc03g083190.3;Solyc03g116390.4;Solyc03g118540.4;Solyc03g119980.3;Solyc03g120290.3;Solyc05g007895.1;Solyc05g008640.1;Solyc06g050760.1;Solyc06g084320.1;Solyc07g045190.3;Solyc08g042100.3;Solyc08g080670.1;Solyc08g082180.3;Solyc09g011590.4;Solyc09g011650.4;Solyc09g064820.1;Solyc09g065870.4;Solyc09g091600.4;Solyc11g020330.1;Solyc12g005300.2;Solyc12g…
GO:0006006	glucose metabolic process	1	1/714	18/10829	0.84	0.707341	0.995806	Solyc02g020940.3	Solyc02g020940.3
GO:0009894	regulation of catabolic process	1	1/714	18/10829	0.84	0.707341	0.995806	Solyc09g011030.3	Solyc09g011030.3
GO:0010090	trichome morphogenesis	1	1/714	18/10829	0.84	0.707341	0.995806	Solyc05g009170.3	Solyc05g009170.3
GO:0010256	endomembrane system organization	1	1/714	18/10829	0.84	0.707341	0.995806	Solyc01g107250.3	Solyc01g107250.3
GO:0018205	peptidyl-lysine modification	1	1/714	18/10829	0.84	0.707341	0.995806	Solyc11g010440.3	Solyc11g010440.3
GO:0022900	electron transport chain	1	1/714	18/10829	0.84	0.707341	0.995806	Solyc01g095670.4	Solyc01g095670.4
GO:0030150	protein import into mitochondrial matrix	1	1/714	18/10829	0.84	0.707341	0.995806	Solyc01g060070.3	Solyc01g060070.3
GO:0031329	regulation of cellular catabolic process	1	1/714	18/10829	0.84	0.707341	0.995806	Solyc09g011030.3	Solyc09g011030.3
GO:0031338	regulation of vesicle fusion	1	1/714	18/10829	0.84	0.707341	0.995806	Solyc07g049580.3	Solyc07g049580.3
GO:0046854	phosphatidylinositol phosphorylation	1	1/714	18/10829	0.84	0.707341	0.995806	Solyc11g012410.2	Solyc11g012410.2
GO:0051603	proteolysis involved in cellular protein catabolic process	7	7/714	123/10829	0.86	0.709847	0.995806	Solyc02g093910.3/Solyc03g116480.1/Solyc03g120320.1/Solyc05g007895.1/Solyc05g008640.1/Solyc06g073890.3/Solyc07g045190.3	Solyc02g093910.3;Solyc03g116480.1;Solyc03g120320.1;Solyc05g007895.1;Solyc05g008640.1;Solyc06g073890.3;Solyc07g045190.3
GO:0000302	response to reactive oxygen species	2	2/714	37/10829	0.82	0.710986	0.995806	Solyc03g119980.3/Solyc06g050760.1	Solyc03g119980.3;Solyc06g050760.1
GO:0060548	negative regulation of cell death	2	2/714	37/10829	0.82	0.710986	0.995806	Solyc03g118200.4/Solyc08g042100.3	Solyc03g118200.4;Solyc08g042100.3
GO:0009605	response to external stimulus	12	12/714	206/10829	0.88	0.713562	0.995806	Solyc01g095670.4/Solyc02g062670.3/Solyc02g092480.4/Solyc03g006050.4/Solyc03g044090.4/Solyc06g050760.1/Solyc07g047950.1/Solyc08g042100.3/Solyc08g080670.1/Solyc09g065870.4/Solyc09g091600.4/Solyc12g005300.2	Solyc01g095670.4;Solyc02g062670.3;Solyc02g092480.4;Solyc03g006050.4;Solyc03g044090.4;Solyc06g050760.1;Solyc07g047950.1;Solyc08g042100.3;Solyc08g080670.1;Solyc09g065870.4;Solyc09g091600.4;Solyc12g005300.2
GO:0040007	growth	4	4/714	73/10829	0.83	0.718005	0.995806	Solyc02g080230.3/Solyc03g112750.4/Solyc05g007895.1/Solyc07g063850.3	Solyc02g080230.3;Solyc03g112750.4;Solyc05g007895.1;Solyc07g063850.3
GO:0051252	regulation of RNA metabolic process	17	17/714	288/10829	0.9	0.718168	0.995806	Solyc01g087050.3/Solyc01g091420.2/Solyc02g062670.3/Solyc02g078030.3/Solyc02g092570.1/Solyc03g083210.3/Solyc03g116480.1/Solyc03g118540.4/Solyc03g123400.1/Solyc04g056320.3/Solyc05g009170.3/Solyc07g043330.3/Solyc07g047950.1/Solyc07g063350.3/Solyc08g006470.4/Solyc11g012510.3/Solyc12g049400.2	Solyc01g087050.3;Solyc01g091420.2;Solyc02g062670.3;Solyc02g078030.3;Solyc02g092570.1;Solyc03g083210.3;Solyc03g116480.1;Solyc03g118540.4;Solyc03g123400.1;Solyc04g056320.3;Solyc05g009170.3;Solyc07g043330.3;Solyc07g047950.1;Solyc07g063350.3;Solyc08g006470.4;Solyc11g012510.3;Solyc12g049400.2
GO:0009657	plastid organization	2	2/714	38/10829	0.8	0.724807	0.995806	Solyc07g065680.3/Solyc09g091600.4	Solyc07g065680.3;Solyc09g091600.4
GO:0009723	response to ethylene	2	2/714	38/10829	0.8	0.724807	0.995806	Solyc01g044556.1/Solyc08g065320.3	Solyc01g044556.1;Solyc08g065320.3
GO:0050776	regulation of immune response	2	2/714	38/10829	0.8	0.724807	0.995806	Solyc08g042100.3/Solyc11g005720.1	Solyc08g042100.3;Solyc11g005720.1
GO:0090696	post-embryonic plant organ development	2	2/714	38/10829	0.8	0.724807	0.995806	Solyc01g091420.2/Solyc06g063270.4	Solyc01g091420.2;Solyc06g063270.4
GO:0009653	anatomical structure morphogenesis	10	10/714	175/10829	0.87	0.725427	0.995806	Solyc01g091420.2/Solyc01g096840.3/Solyc02g080230.3/Solyc03g112750.4/Solyc04g077860.4/Solyc05g007895.1/Solyc05g009170.3/Solyc06g063270.4/Solyc07g063850.3/Solyc11g010440.3	Solyc01g091420.2;Solyc01g096840.3;Solyc02g080230.3;Solyc03g112750.4;Solyc04g077860.4;Solyc05g007895.1;Solyc05g009170.3;Solyc06g063270.4;Solyc07g063850.3;Solyc11g010440.3
GO:0002683	negative regulation of immune system process	1	1/714	19/10829	0.8	0.726669	0.995806	Solyc08g042100.3	Solyc08g042100.3
GO:0002831	regulation of response to biotic stimulus	1	1/714	19/10829	0.8	0.726669	0.995806	Solyc03g006050.4	Solyc03g006050.4
GO:0006890	retrograde vesicle-mediated transport, Golgi to ER	1	1/714	19/10829	0.8	0.726669	0.995806	Solyc03g120260.4	Solyc03g120260.4
GO:0009267	cellular response to starvation	1	1/714	19/10829	0.8	0.726669	0.995806	Solyc09g091600.4	Solyc09g091600.4
GO:0009637	response to blue light	1	1/714	19/10829	0.8	0.726669	0.995806	Solyc10g081490.2	Solyc10g081490.2
GO:0009817	defense response to fungus, incompatible interaction	1	1/714	19/10829	0.8	0.726669	0.995806	Solyc08g080670.1	Solyc08g080670.1
GO:0009926	auxin polar transport	1	1/714	19/10829	0.8	0.726669	0.995806	Solyc03g112750.4	Solyc03g112750.4
GO:0010104	regulation of ethylene-activated signaling pathway	1	1/714	19/10829	0.8	0.726669	0.995806	Solyc08g065320.3	Solyc08g065320.3
GO:0010311	lateral root formation	1	1/714	19/10829	0.8	0.726669	0.995806	Solyc01g091420.2	Solyc01g091420.2
GO:0048868	pollen tube development	1	1/714	19/10829	0.8	0.726669	0.995806	Solyc02g080230.3	Solyc02g080230.3
GO:0051302	regulation of cell division	1	1/714	19/10829	0.8	0.726669	0.995806	Solyc11g010440.3	Solyc11g010440.3
GO:2000028	regulation of photoperiodism, flowering	1	1/714	19/10829	0.8	0.726669	0.995806	Solyc08g042100.3	Solyc08g042100.3
GO:1901362	organic cyclic compound biosynthetic process	4	4/714	74/10829	0.82	0.72795	0.996371	Solyc04g077860.4/Solyc07g063350.3/Solyc07g063850.3/Solyc10g052510.2	Solyc04g077860.4;Solyc07g063350.3;Solyc07g063850.3;Solyc10g052510.2
GO:0050789	regulation of biological process	48	48/714	784/10829	0.93	0.730744	0.999003	Solyc01g044558.1/Solyc01g087050.3/Solyc01g091420.2/Solyc01g107250.3/Solyc02g062670.3/Solyc02g077780.3/Solyc02g078030.3/Solyc02g080610.4/Solyc02g082690.3/Solyc02g092570.1/Solyc02g093910.3/Solyc03g006050.4/Solyc03g043770.4/Solyc03g083210.3/Solyc03g095780.3/Solyc03g116480.1/Solyc03g118200.4/Solyc03g118540.4/Solyc03g120320.1/Solyc03g123400.1/Solyc04g017610.2/Solyc04g056320.3/Solyc05g008640.1/Solyc05g…	Solyc01g044558.1;Solyc01g087050.3;Solyc01g091420.2;Solyc01g107250.3;Solyc02g062670.3;Solyc02g077780.3;Solyc02g078030.3;Solyc02g080610.4;Solyc02g082690.3;Solyc02g092570.1;Solyc02g093910.3;Solyc03g006050.4;Solyc03g043770.4;Solyc03g083210.3;Solyc03g095780.3;Solyc03g116480.1;Solyc03g118200.4;Solyc03g118540.4;Solyc03g120320.1;Solyc03g123400.1;Solyc04g017610.2;Solyc04g056320.3;Solyc05g008640.1;Solyc05g…
GO:0009408	response to heat	4	4/714	75/10829	0.81	0.737631	0.999454	Solyc07g040690.3/Solyc09g011590.4/Solyc09g011650.4/Solyc11g020330.1	Solyc07g040690.3;Solyc09g011590.4;Solyc09g011650.4;Solyc11g020330.1
GO:0032268	regulation of cellular protein metabolic process	4	4/714	75/10829	0.81	0.737631	0.999454	Solyc03g095780.3/Solyc08g082180.3/Solyc09g011030.3/Solyc10g076410.1	Solyc03g095780.3;Solyc08g082180.3;Solyc09g011030.3;Solyc10g076410.1
GO:0071705	nitrogen compound transport	4	4/714	75/10829	0.81	0.737631	0.999454	Solyc01g010290.4/Solyc01g060070.3/Solyc03g120260.4/Solyc07g049580.3	Solyc01g010290.4;Solyc01g060070.3;Solyc03g120260.4;Solyc07g049580.3
GO:0060255	regulation of macromolecule metabolic process	24	24/714	406/10829	0.9	0.742489	0.999454	Solyc01g087050.3/Solyc01g091420.2/Solyc02g062670.3/Solyc02g078030.3/Solyc02g080610.4/Solyc02g092570.1/Solyc02g093910.3/Solyc03g083210.3/Solyc03g095780.3/Solyc03g116480.1/Solyc03g118540.4/Solyc03g120320.1/Solyc03g123400.1/Solyc04g056320.3/Solyc05g009170.3/Solyc07g043330.3/Solyc07g047950.1/Solyc07g063350.3/Solyc08g006470.4/Solyc08g082180.3/Solyc09g011030.3/Solyc10g076410.1/Solyc11g012510.3/Solyc12g…	Solyc01g087050.3;Solyc01g091420.2;Solyc02g062670.3;Solyc02g078030.3;Solyc02g080610.4;Solyc02g092570.1;Solyc02g093910.3;Solyc03g083210.3;Solyc03g095780.3;Solyc03g116480.1;Solyc03g118540.4;Solyc03g120320.1;Solyc03g123400.1;Solyc04g056320.3;Solyc05g009170.3;Solyc07g043330.3;Solyc07g047950.1;Solyc07g063350.3;Solyc08g006470.4;Solyc08g082180.3;Solyc09g011030.3;Solyc10g076410.1;Solyc11g012510.3;Solyc12g…
GO:0019219	regulation of nucleobase-containing compound metabolic process	17	17/714	293/10829	0.88	0.743617	0.999454	Solyc01g087050.3/Solyc01g091420.2/Solyc02g062670.3/Solyc02g078030.3/Solyc02g092570.1/Solyc03g083210.3/Solyc03g116480.1/Solyc03g118540.4/Solyc03g123400.1/Solyc04g056320.3/Solyc05g009170.3/Solyc07g043330.3/Solyc07g047950.1/Solyc07g063350.3/Solyc08g006470.4/Solyc11g012510.3/Solyc12g049400.2	Solyc01g087050.3;Solyc01g091420.2;Solyc02g062670.3;Solyc02g078030.3;Solyc02g092570.1;Solyc03g083210.3;Solyc03g116480.1;Solyc03g118540.4;Solyc03g123400.1;Solyc04g056320.3;Solyc05g009170.3;Solyc07g043330.3;Solyc07g047950.1;Solyc07g063350.3;Solyc08g006470.4;Solyc11g012510.3;Solyc12g049400.2
GO:0007264	small GTPase mediated signal transduction	1	1/714	20/10829	0.76	0.744723	0.999454	Solyc01g111560.3	Solyc01g111560.3
GO:0016226	iron-sulfur cluster assembly	1	1/714	20/10829	0.76	0.744723	0.999454	Solyc05g044630.3	Solyc05g044630.3
GO:0045089	positive regulation of innate immune response	1	1/714	20/10829	0.76	0.744723	0.999454	Solyc11g005720.1	Solyc11g005720.1
GO:0006468	protein phosphorylation	3	3/714	58/10829	0.78	0.745649	0.999454	Solyc01g107250.3/Solyc03g043770.4/Solyc04g082840.4	Solyc01g107250.3;Solyc03g043770.4;Solyc04g082840.4
GO:0044265	cellular macromolecule catabolic process	7	7/714	128/10829	0.83	0.747908	0.999454	Solyc02g093910.3/Solyc03g116480.1/Solyc03g120320.1/Solyc05g007895.1/Solyc05g008640.1/Solyc06g073890.3/Solyc07g045190.3	Solyc02g093910.3;Solyc03g116480.1;Solyc03g120320.1;Solyc05g007895.1;Solyc05g008640.1;Solyc06g073890.3;Solyc07g045190.3
GO:0009967	positive regulation of signal transduction	2	2/714	40/10829	0.76	0.750775	0.999454	Solyc05g008640.1/Solyc07g045190.3	Solyc05g008640.1;Solyc07g045190.3
GO:0043067	regulation of programmed cell death	2	2/714	40/10829	0.76	0.750775	0.999454	Solyc02g080610.4/Solyc08g042100.3	Solyc02g080610.4;Solyc08g042100.3
GO:0048831	regulation of shoot system development	2	2/714	40/10829	0.76	0.750775	0.999454	Solyc02g077250.2/Solyc03g123400.1	Solyc02g077250.2;Solyc03g123400.1
GO:0051345	positive regulation of hydrolase activity	2	2/714	40/10829	0.76	0.750775	0.999454	Solyc02g082690.3/Solyc07g049580.3	Solyc02g082690.3;Solyc07g049580.3
GO:0051726	regulation of cell cycle	2	2/714	40/10829	0.76	0.750775	0.999454	Solyc01g044558.1/Solyc06g073890.3	Solyc01g044558.1;Solyc06g073890.3
GO:0030163	protein catabolic process	7	7/714	129/10829	0.82	0.755079	0.999454	Solyc02g093910.3/Solyc03g116480.1/Solyc03g120320.1/Solyc05g007895.1/Solyc05g008640.1/Solyc06g073890.3/Solyc07g045190.3	Solyc02g093910.3;Solyc03g116480.1;Solyc03g120320.1;Solyc05g007895.1;Solyc05g008640.1;Solyc06g073890.3;Solyc07g045190.3
GO:0009607	response to biotic stimulus	9	9/714	163/10829	0.84	0.755661	0.999454	Solyc01g095670.4/Solyc02g062670.3/Solyc03g006050.4/Solyc06g050760.1/Solyc08g042100.3/Solyc08g080670.1/Solyc09g065870.4/Solyc11g069220.2/Solyc12g005300.2	Solyc01g095670.4;Solyc02g062670.3;Solyc03g006050.4;Solyc06g050760.1;Solyc08g042100.3;Solyc08g080670.1;Solyc09g065870.4;Solyc11g069220.2;Solyc12g005300.2
GO:0032504	multicellular organism reproduction	3	3/714	59/10829	0.77	0.756059	0.999454	Solyc01g044558.1/Solyc05g007895.1/Solyc06g075640.2	Solyc01g044558.1;Solyc05g007895.1;Solyc06g075640.2
GO:0034622	cellular macromolecular complex assembly	3	3/714	59/10829	0.77	0.756059	0.999454	Solyc04g016380.3/Solyc10g078660.2/Solyc10g083740.3	Solyc04g016380.3;Solyc10g078660.2;Solyc10g083740.3
GO:0051049	regulation of transport	3	3/714	59/10829	0.77	0.756059	0.999454	Solyc02g082690.3/Solyc07g049580.3/Solyc07g056650.4	Solyc02g082690.3;Solyc07g049580.3;Solyc07g056650.4
GO:0065003	macromolecular complex assembly	4	4/714	77/10829	0.79	0.756208	0.999454	Solyc02g078410.1/Solyc04g016380.3/Solyc10g078660.2/Solyc10g083740.3	Solyc02g078410.1;Solyc04g016380.3;Solyc10g078660.2;Solyc10g083740.3
GO:0098542	defense response to other organism	5	5/714	95/10829	0.8	0.759307	0.999454	Solyc01g095670.4/Solyc08g042100.3/Solyc08g080670.1/Solyc09g065870.4/Solyc12g005300.2	Solyc01g095670.4;Solyc08g042100.3;Solyc08g080670.1;Solyc09g065870.4;Solyc12g005300.2
GO:0009933	meristem structural organization	1	1/714	21/10829	0.72	0.761585	0.999454	Solyc03g112750.4	Solyc03g112750.4
GO:0010215	cellulose microfibril organization	1	1/714	21/10829	0.72	0.761585	0.999454	Solyc02g065765.1	Solyc02g065765.1
GO:0017038	protein import	1	1/714	21/10829	0.72	0.761585	0.999454	Solyc01g060070.3	Solyc01g060070.3
GO:0031935	regulation of chromatin silencing	1	1/714	21/10829	0.72	0.761585	0.999454	Solyc03g083210.3	Solyc03g083210.3
GO:0048532	anatomical structure arrangement	1	1/714	21/10829	0.72	0.761585	0.999454	Solyc03g112750.4	Solyc03g112750.4
GO:0050778	positive regulation of immune response	1	1/714	21/10829	0.72	0.761585	0.999454	Solyc11g005720.1	Solyc11g005720.1
GO:0090630	activation of GTPase activity	1	1/714	21/10829	0.72	0.761585	0.999454	Solyc07g049580.3	Solyc07g049580.3
GO:0048584	positive regulation of response to stimulus	4	4/714	78/10829	0.78	0.765109	0.999454	Solyc03g006050.4/Solyc05g008640.1/Solyc07g045190.3/Solyc11g005720.1	Solyc03g006050.4;Solyc05g008640.1;Solyc07g045190.3;Solyc11g005720.1
GO:0023056	positive regulation of signaling	2	2/714	42/10829	0.72	0.774606	0.999454	Solyc05g008640.1/Solyc07g045190.3	Solyc05g008640.1;Solyc07g045190.3
GO:0048589	developmental growth	3	3/714	61/10829	0.75	0.775845	0.999454	Solyc02g080230.3/Solyc05g007895.1/Solyc07g063850.3	Solyc02g080230.3;Solyc05g007895.1;Solyc07g063850.3
GO:0006897	endocytosis	1	1/714	22/10829	0.69	0.777336	0.999454	Solyc07g053310.3	Solyc07g053310.3
GO:0007005	mitochondrion organization	1	1/714	22/10829	0.69	0.777336	0.999454	Solyc01g060070.3	Solyc01g060070.3
GO:0032535	regulation of cellular component size	1	1/714	22/10829	0.69	0.777336	0.999454	Solyc03g118200.4	Solyc03g118200.4
GO:0042594	response to starvation	1	1/714	22/10829	0.69	0.777336	0.999454	Solyc09g091600.4	Solyc09g091600.4
GO:0048509	regulation of meristem development	1	1/714	22/10829	0.69	0.777336	0.999454	Solyc03g043770.4	Solyc03g043770.4
GO:0050801	ion homeostasis	1	1/714	22/10829	0.69	0.777336	0.999454	Solyc07g032170.3	Solyc07g032170.3
GO:0051865	protein autoubiquitination	1	1/714	22/10829	0.69	0.777336	0.999454	Solyc05g007895.1	Solyc05g007895.1
GO:0043412	macromolecule modification	34	34/714	576/10829	0.9	0.777488	0.999454	Solyc01g007267.1/Solyc01g088490.3/Solyc01g107250.3/Solyc02g069500.1/Solyc02g072010.3/Solyc02g085650.4/Solyc03g083210.3/Solyc03g113750.3/Solyc03g116480.1/Solyc03g116540.1/Solyc04g010050.4/Solyc04g010060.2/Solyc04g064660.1/Solyc04g079150.1/Solyc05g006460.3/Solyc05g007895.1/Solyc05g008330.3/Solyc05g008640.1/Solyc05g012140.3/Solyc06g009800.3/Solyc06g069700.4/Solyc06g073890.3/Solyc07g045190.3/Solyc08g…	Solyc01g007267.1;Solyc01g088490.3;Solyc01g107250.3;Solyc02g069500.1;Solyc02g072010.3;Solyc02g085650.4;Solyc03g083210.3;Solyc03g113750.3;Solyc03g116480.1;Solyc03g116540.1;Solyc04g010050.4;Solyc04g010060.2;Solyc04g064660.1;Solyc04g079150.1;Solyc05g006460.3;Solyc05g007895.1;Solyc05g008330.3;Solyc05g008640.1;Solyc05g012140.3;Solyc06g009800.3;Solyc06g069700.4;Solyc06g073890.3;Solyc07g045190.3;Solyc08g…
GO:0031324	negative regulation of cellular metabolic process	6	6/714	115/10829	0.79	0.778245	0.999454	Solyc03g095780.3/Solyc03g118540.4/Solyc04g017610.2/Solyc08g082180.3/Solyc10g076410.1/Solyc12g049400.2	Solyc03g095780.3;Solyc03g118540.4;Solyc04g017610.2;Solyc08g082180.3;Solyc10g076410.1;Solyc12g049400.2
GO:0051716	cellular response to stimulus	19	19/714	334/10829	0.86	0.781558	0.999454	Solyc01g044556.1/Solyc01g107250.3/Solyc02g077780.3/Solyc03g083190.3/Solyc03g095780.3/Solyc03g118540.4/Solyc04g077860.4/Solyc05g007895.1/Solyc05g009170.3/Solyc06g084320.1/Solyc07g047950.1/Solyc07g063850.3/Solyc08g082180.3/Solyc09g064820.1/Solyc09g065870.4/Solyc09g091600.4/Solyc10g076410.1/Solyc10g083740.3/Solyc11g005720.1	Solyc01g044556.1;Solyc01g107250.3;Solyc02g077780.3;Solyc03g083190.3;Solyc03g095780.3;Solyc03g118540.4;Solyc04g077860.4;Solyc05g007895.1;Solyc05g009170.3;Solyc06g084320.1;Solyc07g047950.1;Solyc07g063850.3;Solyc08g082180.3;Solyc09g064820.1;Solyc09g065870.4;Solyc09g091600.4;Solyc10g076410.1;Solyc10g083740.3;Solyc11g005720.1
GO:0044271	cellular nitrogen compound biosynthetic process	4	4/714	80/10829	0.76	0.782147	0.999454	Solyc07g063350.3/Solyc07g063850.3/Solyc10g078660.2/Solyc10g083740.3	Solyc07g063350.3;Solyc07g063850.3;Solyc10g078660.2;Solyc10g083740.3
GO:0045454	cell redox homeostasis	4	4/714	80/10829	0.76	0.782147	0.999454	Solyc05g006830.3/Solyc05g053300.3/Solyc10g008390.3/Solyc12g019740.2	Solyc05g006830.3;Solyc05g053300.3;Solyc10g008390.3;Solyc12g019740.2
GO:0044703	multi-organism reproductive process	3	3/714	62/10829	0.73	0.785233	0.999454	Solyc01g044558.1/Solyc01g107250.3/Solyc06g075640.2	Solyc01g044558.1;Solyc01g107250.3;Solyc06g075640.2
GO:0048580	regulation of post-embryonic development	3	3/714	62/10829	0.73	0.785233	0.999454	Solyc06g084320.1/Solyc08g042100.3/Solyc09g064820.1	Solyc06g084320.1;Solyc08g042100.3;Solyc09g064820.1
GO:0007276	gamete generation	2	2/714	43/10829	0.71	0.785757	0.999454	Solyc01g044558.1/Solyc06g075640.2	Solyc01g044558.1;Solyc06g075640.2
GO:0030244	cellulose biosynthetic process	2	2/714	43/10829	0.71	0.785757	0.999454	Solyc07g065660.4/Solyc12g015770.3	Solyc07g065660.4;Solyc12g015770.3
GO:0065008	regulation of biological quality	11	11/714	202/10829	0.83	0.786136	0.999454	Solyc02g077780.3/Solyc02g080610.4/Solyc03g098460.3/Solyc03g112750.4/Solyc03g116390.4/Solyc03g118200.4/Solyc04g077860.4/Solyc05g007895.1/Solyc07g032170.3/Solyc07g056650.4/Solyc07g063850.3	Solyc02g077780.3;Solyc02g080610.4;Solyc03g098460.3;Solyc03g112750.4;Solyc03g116390.4;Solyc03g118200.4;Solyc04g077860.4;Solyc05g007895.1;Solyc07g032170.3;Solyc07g056650.4;Solyc07g063850.3
GO:0005976	polysaccharide metabolic process	1	1/714	23/10829	0.66	0.792047	0.999454	Solyc12g013750.2	Solyc12g013750.2
GO:0007064	mitotic sister chromatid cohesion	1	1/714	23/10829	0.66	0.792047	0.999454	Solyc06g051300.3	Solyc06g051300.3
GO:0009642	response to light intensity	1	1/714	23/10829	0.66	0.792047	0.999454	Solyc09g090540.3	Solyc09g090540.3
GO:0009856	pollination	1	1/714	23/10829	0.66	0.792047	0.999454	Solyc02g080230.3	Solyc02g080230.3
GO:0009965	leaf morphogenesis	1	1/714	23/10829	0.66	0.792047	0.999454	Solyc03g112750.4	Solyc03g112750.4
GO:0016072	rRNA metabolic process	1	1/714	23/10829	0.66	0.792047	0.999454	Solyc04g016380.3	Solyc04g016380.3
GO:0022904	respiratory electron transport chain	1	1/714	23/10829	0.66	0.792047	0.999454	Solyc09g008270.3	Solyc09g008270.3
GO:0031401	positive regulation of protein modification process	1	1/714	23/10829	0.66	0.792047	0.999454	Solyc09g011030.3	Solyc09g011030.3
GO:0032101	regulation of response to external stimulus	1	1/714	23/10829	0.66	0.792047	0.999454	Solyc03g006050.4	Solyc03g006050.4
GO:0032787	monocarboxylic acid metabolic process	1	1/714	23/10829	0.66	0.792047	0.999454	Solyc07g045190.3	Solyc07g045190.3
GO:0043066	negative regulation of apoptotic process	1	1/714	23/10829	0.66	0.792047	0.999454	Solyc08g042100.3	Solyc08g042100.3
GO:0044706	multi-multicellular organism process	1	1/714	23/10829	0.66	0.792047	0.999454	Solyc02g080230.3	Solyc02g080230.3
GO:0071482	cellular response to light stimulus	1	1/714	23/10829	0.66	0.792047	0.999454	Solyc07g047950.1	Solyc07g047950.1
GO:0080156	mitochondrial mRNA modification	1	1/714	23/10829	0.66	0.792047	0.999454	Solyc02g085650.4	Solyc02g085650.4
GO:0090066	regulation of anatomical structure size	1	1/714	23/10829	0.66	0.792047	0.999454	Solyc03g118200.4	Solyc03g118200.4
GO:1901657	glycosyl compound metabolic process	1	1/714	23/10829	0.66	0.792047	0.999454	Solyc05g009170.3	Solyc05g009170.3
GO:0009058	biosynthetic process	16	16/714	287/10829	0.85	0.792468	0.999454	Solyc01g087050.3/Solyc01g111070.3/Solyc02g078410.1/Solyc03g114560.2/Solyc04g077860.4/Solyc05g046300.3/Solyc07g063350.3/Solyc07g063850.3/Solyc09g064940.2/Solyc09g091510.3/Solyc10g052510.2/Solyc10g078660.2/Solyc10g083740.3/Solyc11g013170.2/Solyc11g019960.2/Solyc11g069780.3	Solyc01g087050.3;Solyc01g111070.3;Solyc02g078410.1;Solyc03g114560.2;Solyc04g077860.4;Solyc05g046300.3;Solyc07g063350.3;Solyc07g063850.3;Solyc09g064940.2;Solyc09g091510.3;Solyc10g052510.2;Solyc10g078660.2;Solyc10g083740.3;Solyc11g013170.2;Solyc11g019960.2;Solyc11g069780.3
GO:0000003	reproduction	14	14/714	254/10829	0.84	0.793981	0.999454	Solyc01g044558.1/Solyc01g096840.3/Solyc01g107250.3/Solyc02g080230.3/Solyc02g092480.4/Solyc03g043770.4/Solyc03g044090.4/Solyc03g063140.4/Solyc05g007895.1/Solyc06g075640.2/Solyc06g084320.1/Solyc08g023490.4/Solyc09g064820.1/Solyc10g083740.3	Solyc01g044558.1;Solyc01g096840.3;Solyc01g107250.3;Solyc02g080230.3;Solyc02g092480.4;Solyc03g043770.4;Solyc03g044090.4;Solyc03g063140.4;Solyc05g007895.1;Solyc06g075640.2;Solyc06g084320.1;Solyc08g023490.4;Solyc09g064820.1;Solyc10g083740.3
GO:0022414	reproductive process	14	14/714	254/10829	0.84	0.793981	0.999454	Solyc01g044558.1/Solyc01g096840.3/Solyc01g107250.3/Solyc02g080230.3/Solyc02g092480.4/Solyc03g043770.4/Solyc03g044090.4/Solyc03g063140.4/Solyc05g007895.1/Solyc06g075640.2/Solyc06g084320.1/Solyc08g023490.4/Solyc09g064820.1/Solyc10g083740.3	Solyc01g044558.1;Solyc01g096840.3;Solyc01g107250.3;Solyc02g080230.3;Solyc02g092480.4;Solyc03g043770.4;Solyc03g044090.4;Solyc03g063140.4;Solyc05g007895.1;Solyc06g075640.2;Solyc06g084320.1;Solyc08g023490.4;Solyc09g064820.1;Solyc10g083740.3
GO:0006281	DNA repair	6	6/714	118/10829	0.77	0.798653	0.999454	Solyc01g088380.3/Solyc02g021100.3/Solyc03g083190.3/Solyc06g008210.4/Solyc09g031610.4/Solyc10g078730.2	Solyc01g088380.3;Solyc02g021100.3;Solyc03g083190.3;Solyc06g008210.4;Solyc09g031610.4;Solyc10g078730.2
GO:0042493	response to drug	3	3/714	64/10829	0.71	0.803034	0.999454	Solyc03g119980.3/Solyc06g050760.1/Solyc07g045190.3	Solyc03g119980.3;Solyc06g050760.1;Solyc07g045190.3
GO:0050832	defense response to fungus	3	3/714	64/10829	0.71	0.803034	0.999454	Solyc07g040690.3/Solyc08g080670.1/Solyc12g005300.2	Solyc07g040690.3;Solyc08g080670.1;Solyc12g005300.2
GO:0006631	fatty acid metabolic process	1	1/714	24/10829	0.63	0.805787	0.999454	Solyc12g007170.3	Solyc12g007170.3
GO:0007015	actin filament organization	1	1/714	24/10829	0.63	0.805787	0.999454	Solyc06g008090.3	Solyc06g008090.3
GO:0012501	programmed cell death	1	1/714	24/10829	0.63	0.805787	0.999454	Solyc02g077780.3	Solyc02g077780.3
GO:0019637	organophosphate metabolic process	1	1/714	24/10829	0.63	0.805787	0.999454	Solyc11g069780.3	Solyc11g069780.3
GO:0042542	response to hydrogen peroxide	1	1/714	24/10829	0.63	0.805787	0.999454	Solyc03g119980.3	Solyc03g119980.3
GO:0048193	Golgi vesicle transport	1	1/714	24/10829	0.63	0.805787	0.999454	Solyc03g120260.4	Solyc03g120260.4
GO:0060968	regulation of gene silencing	1	1/714	24/10829	0.63	0.805787	0.999454	Solyc03g083210.3	Solyc03g083210.3
GO:0071478	cellular response to radiation	1	1/714	24/10829	0.63	0.805787	0.999454	Solyc07g047950.1	Solyc07g047950.1
GO:0090351	seedling development	1	1/714	24/10829	0.63	0.805787	0.999454	Solyc08g082180.3	Solyc08g082180.3
GO:0048468	cell development	4	4/714	83/10829	0.73	0.805846	0.999454	Solyc02g080230.3/Solyc05g007895.1/Solyc05g009170.3/Solyc11g010440.3	Solyc02g080230.3;Solyc05g007895.1;Solyc05g009170.3;Solyc11g010440.3
GO:0006099	tricarboxylic acid cycle	2	2/714	45/10829	0.67	0.806612	0.999454	Solyc09g075450.3/Solyc09g090140.4	Solyc09g075450.3;Solyc09g090140.4
GO:0010647	positive regulation of cell communication	2	2/714	45/10829	0.67	0.806612	0.999454	Solyc05g008640.1/Solyc07g045190.3	Solyc05g008640.1;Solyc07g045190.3
GO:0018130	heterocycle biosynthetic process	3	3/714	65/10829	0.7	0.81146	0.999454	Solyc04g077860.4/Solyc07g063350.3/Solyc07g063850.3	Solyc04g077860.4;Solyc07g063350.3;Solyc07g063850.3
GO:0033365	protein localization to organelle	2	2/714	46/10829	0.66	0.816347	0.999454	Solyc01g060070.3/Solyc02g080610.4	Solyc01g060070.3;Solyc02g080610.4
GO:1902680	positive regulation of RNA biosynthetic process	2	2/714	46/10829	0.66	0.816347	0.999454	Solyc01g091420.2/Solyc07g063350.3	Solyc01g091420.2;Solyc07g063350.3
GO:1903508	positive regulation of nucleic acid-templated transcription	2	2/714	46/10829	0.66	0.816347	0.999454	Solyc01g091420.2/Solyc07g063350.3	Solyc01g091420.2;Solyc07g063350.3
GO:0009772	photosynthetic electron transport in photosystem II	1	1/714	25/10829	0.61	0.818621	0.999454	Solyc01g095670.4	Solyc01g095670.4
GO:0010073	meristem maintenance	1	1/714	25/10829	0.61	0.818621	0.999454	Solyc03g043770.4	Solyc03g043770.4
GO:0019684	photosynthesis, light reaction	1	1/714	25/10829	0.61	0.818621	0.999454	Solyc01g095670.4	Solyc01g095670.4
GO:0031669	cellular response to nutrient levels	1	1/714	25/10829	0.61	0.818621	0.999454	Solyc09g091600.4	Solyc09g091600.4
GO:0048588	developmental cell growth	1	1/714	25/10829	0.61	0.818621	0.999454	Solyc02g080230.3	Solyc02g080230.3
GO:0051259	protein oligomerization	1	1/714	25/10829	0.61	0.818621	0.999454	Solyc02g078410.1	Solyc02g078410.1
GO:0006508	proteolysis	7	7/714	139/10829	0.76	0.818799	0.999454	Solyc02g093910.3/Solyc03g116480.1/Solyc03g120320.1/Solyc05g007895.1/Solyc05g008640.1/Solyc06g073890.3/Solyc07g045190.3	Solyc02g093910.3;Solyc03g116480.1;Solyc03g120320.1;Solyc05g007895.1;Solyc05g008640.1;Solyc06g073890.3;Solyc07g045190.3
GO:0048583	regulation of response to stimulus	12	12/714	226/10829	0.81	0.820388	0.999454	Solyc02g078030.3/Solyc03g006050.4/Solyc03g083210.3/Solyc03g118540.4/Solyc03g120320.1/Solyc05g008640.1/Solyc05g009170.3/Solyc07g045190.3/Solyc08g042100.3/Solyc08g077100.3/Solyc11g005720.1/Solyc12g049400.2	Solyc02g078030.3;Solyc03g006050.4;Solyc03g083210.3;Solyc03g118540.4;Solyc03g120320.1;Solyc05g008640.1;Solyc05g009170.3;Solyc07g045190.3;Solyc08g042100.3;Solyc08g077100.3;Solyc11g005720.1;Solyc12g049400.2
GO:0006511	ubiquitin-dependent protein catabolic process	12	12/714	227/10829	0.8	0.824834	0.999454	Solyc02g093910.3/Solyc03g116480.1/Solyc03g120320.1/Solyc04g076210.3/Solyc05g007895.1/Solyc05g008640.1/Solyc06g073890.3/Solyc07g008250.3/Solyc07g045190.3/Solyc10g009420.3/Solyc11g008420.3/Solyc12g099310.2	Solyc02g093910.3;Solyc03g116480.1;Solyc03g120320.1;Solyc04g076210.3;Solyc05g007895.1;Solyc05g008640.1;Solyc06g073890.3;Solyc07g008250.3;Solyc07g045190.3;Solyc10g009420.3;Solyc11g008420.3;Solyc12g099310.2
GO:0006886	intracellular protein transport	11	11/714	210/10829	0.79	0.825503	0.999454	Solyc01g006950.3/Solyc01g007150.3/Solyc01g060070.3/Solyc01g080850.4/Solyc02g032930.3/Solyc02g085240.4/Solyc03g120260.4/Solyc04g026360.3/Solyc05g052310.3/Solyc07g017520.4/Solyc07g049580.3	Solyc01g006950.3;Solyc01g007150.3;Solyc01g060070.3;Solyc01g080850.4;Solyc02g032930.3;Solyc02g085240.4;Solyc03g120260.4;Solyc04g026360.3;Solyc05g052310.3;Solyc07g017520.4;Solyc07g049580.3
GO:0046677	response to antibiotic	2	2/714	47/10829	0.65	0.825641	0.999454	Solyc03g119980.3/Solyc06g050760.1	Solyc03g119980.3;Solyc06g050760.1
GO:0009416	response to light stimulus	8	8/714	158/10829	0.77	0.82617	0.999454	Solyc01g095580.3/Solyc03g006880.3/Solyc03g117590.3/Solyc06g068500.3/Solyc07g047950.1/Solyc07g063350.3/Solyc07g063850.3/Solyc08g081840.3	Solyc01g095580.3;Solyc03g006880.3;Solyc03g117590.3;Solyc06g068500.3;Solyc07g047950.1;Solyc07g063350.3;Solyc07g063850.3;Solyc08g081840.3
GO:0019438	aromatic compound biosynthetic process	3	3/714	67/10829	0.68	0.8274	0.999454	Solyc07g063350.3/Solyc07g063850.3/Solyc10g052510.2	Solyc07g063350.3;Solyc07g063850.3;Solyc10g052510.2
GO:0007049	cell cycle	4	4/714	86/10829	0.71	0.827406	0.999454	Solyc01g044558.1/Solyc01g079500.4/Solyc01g107250.3/Solyc06g075640.2	Solyc01g044558.1;Solyc01g079500.4;Solyc01g107250.3;Solyc06g075640.2
GO:0034613	cellular protein localization	4	4/714	86/10829	0.71	0.827406	0.999454	Solyc01g060070.3/Solyc02g080610.4/Solyc03g120260.4/Solyc07g049580.3	Solyc01g060070.3;Solyc02g080610.4;Solyc03g120260.4;Solyc07g049580.3
GO:0043933	macromolecular complex subunit organization	4	4/714	86/10829	0.71	0.827406	0.999454	Solyc02g078410.1/Solyc04g016380.3/Solyc10g078660.2/Solyc10g083740.3	Solyc02g078410.1;Solyc04g016380.3;Solyc10g078660.2;Solyc10g083740.3
GO:0048364	root development	4	4/714	86/10829	0.71	0.827406	0.999454	Solyc01g091420.2/Solyc04g076210.3/Solyc06g063270.4/Solyc11g010440.3	Solyc01g091420.2;Solyc04g076210.3;Solyc06g063270.4;Solyc11g010440.3
GO:0051172	negative regulation of nitrogen compound metabolic process	5	5/714	105/10829	0.72	0.830505	0.999454	Solyc03g095780.3/Solyc03g118540.4/Solyc08g082180.3/Solyc10g076410.1/Solyc12g049400.2	Solyc03g095780.3;Solyc03g118540.4;Solyc08g082180.3;Solyc10g076410.1;Solyc12g049400.2
GO:0007166	cell surface receptor signaling pathway	1	1/714	26/10829	0.58	0.830607	0.999454	Solyc01g107250.3	Solyc01g107250.3
GO:0008219	cell death	1	1/714	26/10829	0.58	0.830607	0.999454	Solyc02g077780.3	Solyc02g077780.3
GO:0009411	response to UV	1	1/714	26/10829	0.58	0.830607	0.999454	Solyc10g081490.2	Solyc10g081490.2
GO:0009767	photosynthetic electron transport chain	1	1/714	26/10829	0.58	0.830607	0.999454	Solyc01g095670.4	Solyc01g095670.4
GO:0009845	seed germination	1	1/714	26/10829	0.58	0.830607	0.999454	Solyc08g082180.3	Solyc08g082180.3
GO:1902275	regulation of chromatin organization	1	1/714	26/10829	0.58	0.830607	0.999454	Solyc03g083210.3	Solyc03g083210.3
GO:0006979	response to oxidative stress	11	11/714	212/10829	0.79	0.834436	0.999454	Solyc01g007950.4/Solyc01g104860.3/Solyc02g090450.3/Solyc02g092580.3/Solyc03g119980.3/Solyc04g071890.3/Solyc06g050760.1/Solyc08g069040.3/Solyc08g080940.3/Solyc11g018772.1/Solyc11g018805.1	Solyc01g007950.4;Solyc01g104860.3;Solyc02g090450.3;Solyc02g092580.3;Solyc03g119980.3;Solyc04g071890.3;Solyc06g050760.1;Solyc08g069040.3;Solyc08g080940.3;Solyc11g018772.1;Solyc11g018805.1
GO:0090698	post-embryonic plant morphogenesis	2	2/714	48/10829	0.63	0.83451	0.999454	Solyc01g091420.2/Solyc06g063270.4	Solyc01g091420.2;Solyc06g063270.4
GO:0006796	phosphate-containing compound metabolic process	3	3/714	68/10829	0.67	0.834928	0.999454	Solyc01g107250.3/Solyc09g010380.3/Solyc11g069780.3	Solyc01g107250.3;Solyc09g010380.3;Solyc11g069780.3
GO:0051173	positive regulation of nitrogen compound metabolic process	4	4/714	88/10829	0.69	0.840648	0.999454	Solyc01g091420.2/Solyc07g063350.3/Solyc07g063850.3/Solyc09g011030.3	Solyc01g091420.2;Solyc07g063350.3;Solyc07g063850.3;Solyc09g011030.3
GO:0006289	nucleotide-excision repair	1	1/714	27/10829	0.56	0.841803	0.999454	Solyc04g007120.4	Solyc04g007120.4
GO:0045927	positive regulation of growth	1	1/714	27/10829	0.56	0.841803	0.999454	Solyc04g081510.4	Solyc04g081510.4
GO:0080167	response to karrikin	1	1/714	27/10829	0.56	0.841803	0.999454	Solyc07g045190.3	Solyc07g045190.3
GO:1900864	mitochondrial RNA modification	1	1/714	27/10829	0.56	0.841803	0.999454	Solyc02g085650.4	Solyc02g085650.4
GO:0031328	positive regulation of cellular biosynthetic process	3	3/714	69/10829	0.66	0.842172	0.999454	Solyc01g091420.2/Solyc07g063350.3/Solyc07g063850.3	Solyc01g091420.2;Solyc07g063350.3;Solyc07g063850.3
GO:0016310	phosphorylation	2	2/714	49/10829	0.62	0.84297	0.999454	Solyc01g107250.3/Solyc04g007390.4	Solyc01g107250.3;Solyc04g007390.4
GO:0009314	response to radiation	7	7/714	144/10829	0.74	0.845429	0.999454	Solyc01g095580.3/Solyc03g117590.3/Solyc06g068500.3/Solyc07g047950.1/Solyc07g063350.3/Solyc07g063850.3/Solyc08g081840.3	Solyc01g095580.3;Solyc03g117590.3;Solyc06g068500.3;Solyc07g047950.1;Solyc07g063350.3;Solyc07g063850.3;Solyc08g081840.3
GO:0032259	methylation	6	6/714	126/10829	0.72	0.845978	0.999454	Solyc01g088000.4/Solyc01g091640.3/Solyc03g083210.3/Solyc04g005430.4/Solyc05g012450.4/Solyc11g010440.3	Solyc01g088000.4;Solyc01g091640.3;Solyc03g083210.3;Solyc04g005430.4;Solyc05g012450.4;Solyc11g010440.3
GO:0071704	organic substance metabolic process	57	57/714	972/10829	0.89	0.84833	0.999454	Solyc01g007267.1/Solyc01g087050.3/Solyc01g088490.3/Solyc01g095670.4/Solyc01g107250.3/Solyc02g069500.1/Solyc02g072010.3/Solyc02g078410.1/Solyc02g085650.4/Solyc02g093910.3/Solyc03g083190.3/Solyc03g083210.3/Solyc03g098460.3/Solyc03g113750.3/Solyc03g116480.1/Solyc03g116540.1/Solyc03g119980.3/Solyc03g120320.1/Solyc04g010050.4/Solyc04g010060.2/Solyc04g016380.3/Solyc04g064660.1/Solyc04g077860.4/Solyc04g…	Solyc01g007267.1;Solyc01g087050.3;Solyc01g088490.3;Solyc01g095670.4;Solyc01g107250.3;Solyc02g069500.1;Solyc02g072010.3;Solyc02g078410.1;Solyc02g085650.4;Solyc02g093910.3;Solyc03g083190.3;Solyc03g083210.3;Solyc03g098460.3;Solyc03g113750.3;Solyc03g116480.1;Solyc03g116540.1;Solyc03g119980.3;Solyc03g120320.1;Solyc04g010050.4;Solyc04g010060.2;Solyc04g016380.3;Solyc04g064660.1;Solyc04g077860.4;Solyc04g…
GO:0002376	immune system process	3	3/714	70/10829	0.65	0.849139	0.999454	Solyc02g077780.3/Solyc08g080670.1/Solyc11g005720.1	Solyc02g077780.3;Solyc08g080670.1;Solyc11g005720.1
GO:0015833	peptide transport	3	3/714	70/10829	0.65	0.849139	0.999454	Solyc01g060070.3/Solyc03g120260.4/Solyc07g049580.3	Solyc01g060070.3;Solyc03g120260.4;Solyc07g049580.3
GO:0022622	root system development	3	3/714	70/10829	0.65	0.849139	0.999454	Solyc01g091420.2/Solyc06g063270.4/Solyc11g010440.3	Solyc01g091420.2;Solyc06g063270.4;Solyc11g010440.3
GO:0042886	amide transport	3	3/714	70/10829	0.65	0.849139	0.999454	Solyc01g060070.3/Solyc03g120260.4/Solyc07g049580.3	Solyc01g060070.3;Solyc03g120260.4;Solyc07g049580.3
GO:0002682	regulation of immune system process	2	2/714	50/10829	0.61	0.851035	0.999454	Solyc08g042100.3/Solyc11g005720.1	Solyc08g042100.3;Solyc11g005720.1
GO:0045087	innate immune response	2	2/714	50/10829	0.61	0.851035	0.999454	Solyc02g077780.3/Solyc08g080670.1	Solyc02g077780.3;Solyc08g080670.1
GO:0051254	positive regulation of RNA metabolic process	2	2/714	50/10829	0.61	0.851035	0.999454	Solyc01g091420.2/Solyc07g063350.3	Solyc01g091420.2;Solyc07g063350.3
GO:2000112	regulation of cellular macromolecule biosynthetic process	15	15/714	285/10829	0.8	0.85143	0.999454	Solyc01g087050.3/Solyc01g091420.2/Solyc02g062670.3/Solyc02g078030.3/Solyc02g092570.1/Solyc03g083210.3/Solyc03g116480.1/Solyc03g123400.1/Solyc04g056320.3/Solyc05g009170.3/Solyc07g043330.3/Solyc07g047950.1/Solyc07g063350.3/Solyc08g006470.4/Solyc11g012510.3	Solyc01g087050.3;Solyc01g091420.2;Solyc02g062670.3;Solyc02g078030.3;Solyc02g092570.1;Solyc03g083210.3;Solyc03g116480.1;Solyc03g123400.1;Solyc04g056320.3;Solyc05g009170.3;Solyc07g043330.3;Solyc07g047950.1;Solyc07g063350.3;Solyc08g006470.4;Solyc11g012510.3
GO:0009765	photosynthesis, light harvesting	1	1/714	28/10829	0.54	0.85226	0.999454	Solyc12g009200.2	Solyc12g009200.2
GO:0018193	peptidyl-amino acid modification	1	1/714	28/10829	0.54	0.85226	0.999454	Solyc11g010440.3	Solyc11g010440.3
GO:0070727	cellular macromolecule localization	4	4/714	90/10829	0.67	0.853027	0.999454	Solyc01g060070.3/Solyc02g080610.4/Solyc03g120260.4/Solyc07g049580.3	Solyc01g060070.3;Solyc02g080610.4;Solyc03g120260.4;Solyc07g049580.3
GO:0010817	regulation of hormone levels	5	5/714	109/10829	0.7	0.853735	0.999454	Solyc02g077780.3/Solyc03g098460.3/Solyc03g112750.4/Solyc04g077860.4/Solyc07g056650.4	Solyc02g077780.3;Solyc03g098460.3;Solyc03g112750.4;Solyc04g077860.4;Solyc07g056650.4
GO:0009891	positive regulation of biosynthetic process	3	3/714	71/10829	0.64	0.855837	0.999454	Solyc01g091420.2/Solyc07g063350.3/Solyc07g063850.3	Solyc01g091420.2;Solyc07g063350.3;Solyc07g063850.3
GO:0014070	response to organic cyclic compound	2	2/714	51/10829	0.59	0.858721	0.999454	Solyc01g107250.3/Solyc04g077860.4	Solyc01g107250.3;Solyc04g077860.4
GO:0048507	meristem development	2	2/714	51/10829	0.59	0.858721	0.999454	Solyc03g043770.4/Solyc03g112750.4	Solyc03g043770.4;Solyc03g112750.4
GO:0009798	axis specification	1	1/714	29/10829	0.52	0.862026	0.999454	Solyc03g063140.4	Solyc03g063140.4
GO:0016556	mRNA modification	1	1/714	29/10829	0.52	0.862026	0.999454	Solyc02g085650.4	Solyc02g085650.4
GO:0031667	response to nutrient levels	1	1/714	29/10829	0.52	0.862026	0.999454	Solyc09g091600.4	Solyc09g091600.4
GO:0045088	regulation of innate immune response	1	1/714	29/10829	0.52	0.862026	0.999454	Solyc11g005720.1	Solyc11g005720.1
GO:0045165	cell fate commitment	1	1/714	29/10829	0.52	0.862026	0.999454	Solyc07g043330.3	Solyc07g043330.3
GO:0048316	seed development	4	4/714	92/10829	0.66	0.86458	0.999454	Solyc01g096840.3/Solyc01g107250.3/Solyc05g007895.1/Solyc08g023490.4	Solyc01g096840.3;Solyc01g107250.3;Solyc05g007895.1;Solyc08g023490.4
GO:0006082	organic acid metabolic process	2	2/714	52/10829	0.58	0.866044	0.999454	Solyc05g009170.3/Solyc07g045190.3	Solyc05g009170.3;Solyc07g045190.3
GO:0006325	chromatin organization	2	2/714	52/10829	0.58	0.866044	0.999454	Solyc02g092910.3/Solyc11g010440.3	Solyc02g092910.3;Solyc11g010440.3
GO:0043436	oxoacid metabolic process	2	2/714	52/10829	0.58	0.866044	0.999454	Solyc05g009170.3/Solyc07g045190.3	Solyc05g009170.3;Solyc07g045190.3
GO:0048609	multicellular organismal reproductive process	2	2/714	52/10829	0.58	0.866044	0.999454	Solyc01g044558.1/Solyc06g075640.2	Solyc01g044558.1;Solyc06g075640.2
GO:0045184	establishment of protein localization	3	3/714	73/10829	0.62	0.868456	0.999454	Solyc01g060070.3/Solyc03g120260.4/Solyc07g049580.3	Solyc01g060070.3;Solyc03g120260.4;Solyc07g049580.3
GO:0045944	positive regulation of transcription from RNA polymerase II promoter	3	3/714	73/10829	0.62	0.868456	0.999454	Solyc02g071730.4/Solyc11g010570.2/Solyc12g056460.3	Solyc02g071730.4;Solyc11g010570.2;Solyc12g056460.3
GO:0010154	fruit development	4	4/714	93/10829	0.65	0.87006	0.999454	Solyc01g096840.3/Solyc01g107250.3/Solyc05g007895.1/Solyc08g023490.4	Solyc01g096840.3;Solyc01g107250.3;Solyc05g007895.1;Solyc08g023490.4
GO:0048585	negative regulation of response to stimulus	4	4/714	93/10829	0.65	0.87006	0.999454	Solyc02g078030.3/Solyc03g120320.1/Solyc05g009170.3/Solyc08g042100.3	Solyc02g078030.3;Solyc03g120320.1;Solyc05g009170.3;Solyc08g042100.3
GO:0000959	mitochondrial RNA metabolic process	1	1/714	30/10829	0.51	0.871148	0.999454	Solyc02g085650.4	Solyc02g085650.4
GO:0002684	positive regulation of immune system process	1	1/714	30/10829	0.51	0.871148	0.999454	Solyc11g005720.1	Solyc11g005720.1
GO:0006811	ion transport	1	1/714	30/10829	0.51	0.871148	0.999454	Solyc01g060070.3	Solyc01g060070.3
GO:0032880	regulation of protein localization	1	1/714	30/10829	0.51	0.871148	0.999454	Solyc02g082690.3	Solyc02g082690.3
GO:0042127	regulation of cell proliferation	1	1/714	30/10829	0.51	0.871148	0.999454	Solyc06g063270.4	Solyc06g063270.4
GO:0051704	multi-organism process	12	12/714	239/10829	0.76	0.8719	0.999454	Solyc01g044558.1/Solyc01g095670.4/Solyc01g107250.3/Solyc02g062670.3/Solyc02g080230.3/Solyc03g006050.4/Solyc06g050760.1/Solyc06g075640.2/Solyc08g042100.3/Solyc08g080670.1/Solyc09g065870.4/Solyc12g005300.2	Solyc01g044558.1;Solyc01g095670.4;Solyc01g107250.3;Solyc02g062670.3;Solyc02g080230.3;Solyc03g006050.4;Solyc06g050760.1;Solyc06g075640.2;Solyc08g042100.3;Solyc08g080670.1;Solyc09g065870.4;Solyc12g005300.2
GO:0042592	homeostatic process	2	2/714	53/10829	0.57	0.873016	0.999454	Solyc07g032170.3/Solyc07g063850.3	Solyc07g032170.3;Solyc07g063850.3
GO:0033036	macromolecule localization	5	5/714	113/10829	0.67	0.874254	0.999454	Solyc01g060070.3/Solyc02g077780.3/Solyc02g080610.4/Solyc03g120260.4/Solyc07g049580.3	Solyc01g060070.3;Solyc02g077780.3;Solyc02g080610.4;Solyc03g120260.4;Solyc07g049580.3
GO:0008152	metabolic process	60	60/714	1034/10829	0.88	0.874633	0.999454	Solyc01g007267.1/Solyc01g087050.3/Solyc01g088490.3/Solyc01g095670.4/Solyc01g107250.3/Solyc02g069500.1/Solyc02g072010.3/Solyc02g078410.1/Solyc02g085650.4/Solyc02g093910.3/Solyc03g044720.2/Solyc03g083190.3/Solyc03g083210.3/Solyc03g098460.3/Solyc03g113750.3/Solyc03g116480.1/Solyc03g116540.1/Solyc03g119980.3/Solyc03g120320.1/Solyc04g010050.4/Solyc04g010060.2/Solyc04g016380.3/Solyc04g064660.1/Solyc04g…	Solyc01g007267.1;Solyc01g087050.3;Solyc01g088490.3;Solyc01g095670.4;Solyc01g107250.3;Solyc02g069500.1;Solyc02g072010.3;Solyc02g078410.1;Solyc02g085650.4;Solyc02g093910.3;Solyc03g044720.2;Solyc03g083190.3;Solyc03g083210.3;Solyc03g098460.3;Solyc03g113750.3;Solyc03g116480.1;Solyc03g116540.1;Solyc03g119980.3;Solyc03g120320.1;Solyc04g010050.4;Solyc04g010060.2;Solyc04g016380.3;Solyc04g064660.1;Solyc04g…
GO:0036211	protein modification process	11	11/714	223/10829	0.75	0.877424	0.999454	Solyc01g107250.3/Solyc03g116480.1/Solyc05g007895.1/Solyc05g008640.1/Solyc06g073890.3/Solyc07g045190.3/Solyc08g042100.3/Solyc08g077100.3/Solyc09g065870.4/Solyc10g007000.3/Solyc11g010440.3	Solyc01g107250.3;Solyc03g116480.1;Solyc05g007895.1;Solyc05g008640.1;Solyc06g073890.3;Solyc07g045190.3;Solyc08g042100.3;Solyc08g077100.3;Solyc09g065870.4;Solyc10g007000.3;Solyc11g010440.3
GO:0007034	vacuolar transport	1	1/714	31/10829	0.49	0.879667	0.999454	Solyc02g069680.3	Solyc02g069680.3
GO:0007346	regulation of mitotic cell cycle	1	1/714	31/10829	0.49	0.879667	0.999454	Solyc03g097920.1	Solyc03g097920.1
GO:0032270	positive regulation of cellular protein metabolic process	1	1/714	31/10829	0.49	0.879667	0.999454	Solyc09g011030.3	Solyc09g011030.3
GO:0048638	regulation of developmental growth	1	1/714	31/10829	0.49	0.879667	0.999454	Solyc03g043770.4	Solyc03g043770.4
GO:0051247	positive regulation of protein metabolic process	1	1/714	31/10829	0.49	0.879667	0.999454	Solyc09g011030.3	Solyc09g011030.3
GO:0022402	cell cycle process	3	3/714	75/10829	0.61	0.880091	0.999454	Solyc01g044558.1/Solyc01g107250.3/Solyc06g075640.2	Solyc01g044558.1;Solyc01g107250.3;Solyc06g075640.2
GO:0023051	regulation of signaling	7	7/714	152/10829	0.7	0.881413	0.999454	Solyc03g118540.4/Solyc03g120320.1/Solyc05g008640.1/Solyc05g009170.3/Solyc07g045190.3/Solyc08g077100.3/Solyc12g049400.2	Solyc03g118540.4;Solyc03g120320.1;Solyc05g008640.1;Solyc05g009170.3;Solyc07g045190.3;Solyc08g077100.3;Solyc12g049400.2
GO:0034641	cellular nitrogen compound metabolic process	34	34/714	616/10829	0.84	0.884937	0.999454	Solyc01g007267.1/Solyc01g088490.3/Solyc02g069500.1/Solyc02g072010.3/Solyc02g085650.4/Solyc03g083190.3/Solyc03g083210.3/Solyc03g113750.3/Solyc03g116540.1/Solyc04g010050.4/Solyc04g010060.2/Solyc04g016380.3/Solyc04g064660.1/Solyc04g079150.1/Solyc05g006460.3/Solyc05g008330.3/Solyc05g012140.3/Solyc06g009800.3/Solyc06g069700.4/Solyc07g056490.4/Solyc07g063350.3/Solyc07g063850.3/Solyc08g023490.4/Solyc08g…	Solyc01g007267.1;Solyc01g088490.3;Solyc02g069500.1;Solyc02g072010.3;Solyc02g085650.4;Solyc03g083190.3;Solyc03g083210.3;Solyc03g113750.3;Solyc03g116540.1;Solyc04g010050.4;Solyc04g010060.2;Solyc04g016380.3;Solyc04g064660.1;Solyc04g079150.1;Solyc05g006460.3;Solyc05g008330.3;Solyc05g012140.3;Solyc06g009800.3;Solyc06g069700.4;Solyc07g056490.4;Solyc07g063350.3;Solyc07g063850.3;Solyc08g023490.4;Solyc08g…
GO:0009966	regulation of signal transduction	7	7/714	153/10829	0.69	0.885378	0.999454	Solyc03g118540.4/Solyc03g120320.1/Solyc05g008640.1/Solyc05g009170.3/Solyc07g045190.3/Solyc08g077100.3/Solyc12g049400.2	Solyc03g118540.4;Solyc03g120320.1;Solyc05g008640.1;Solyc05g009170.3;Solyc07g045190.3;Solyc08g077100.3;Solyc12g049400.2
GO:0006605	protein targeting	1	1/714	32/10829	0.47	0.887624	0.999454	Solyc01g060070.3	Solyc01g060070.3
GO:0009814	defense response, incompatible interaction	1	1/714	32/10829	0.47	0.887624	0.999454	Solyc08g080670.1	Solyc08g080670.1
GO:0043069	negative regulation of programmed cell death	1	1/714	32/10829	0.47	0.887624	0.999454	Solyc08g042100.3	Solyc08g042100.3
GO:0030154	cell differentiation	7	7/714	154/10829	0.69	0.889232	0.999454	Solyc02g080230.3/Solyc05g007895.1/Solyc05g009170.3/Solyc06g053610.3/Solyc07g043330.3/Solyc10g081490.2/Solyc11g010440.3	Solyc02g080230.3;Solyc05g007895.1;Solyc05g009170.3;Solyc06g053610.3;Solyc07g043330.3;Solyc10g081490.2;Solyc11g010440.3
GO:1901564	organonitrogen compound metabolic process	24	24/714	451/10829	0.81	0.889343	0.999454	Solyc01g095670.4/Solyc01g107250.3/Solyc02g093910.3/Solyc03g116480.1/Solyc03g120320.1/Solyc05g007895.1/Solyc05g008640.1/Solyc05g009170.3/Solyc06g073890.3/Solyc07g045190.3/Solyc07g056490.4/Solyc07g063350.3/Solyc07g063850.3/Solyc08g042100.3/Solyc08g077100.3/Solyc08g080900.3/Solyc09g011590.4/Solyc09g011650.4/Solyc09g065870.4/Solyc10g007000.3/Solyc10g078660.2/Solyc10g083740.3/Solyc11g010440.3/Solyc12g…	Solyc01g095670.4;Solyc01g107250.3;Solyc02g093910.3;Solyc03g116480.1;Solyc03g120320.1;Solyc05g007895.1;Solyc05g008640.1;Solyc05g009170.3;Solyc06g073890.3;Solyc07g045190.3;Solyc07g056490.4;Solyc07g063350.3;Solyc07g063850.3;Solyc08g042100.3;Solyc08g077100.3;Solyc08g080900.3;Solyc09g011590.4;Solyc09g011650.4;Solyc09g065870.4;Solyc10g007000.3;Solyc10g078660.2;Solyc10g083740.3;Solyc11g010440.3;Solyc12g…
GO:0031325	positive regulation of cellular metabolic process	4	4/714	97/10829	0.63	0.890108	0.999454	Solyc01g091420.2/Solyc07g063350.3/Solyc07g063850.3/Solyc09g011030.3	Solyc01g091420.2;Solyc07g063350.3;Solyc07g063850.3;Solyc09g011030.3
GO:0006364	rRNA processing	2	2/714	56/10829	0.54	0.891976	0.999454	Solyc04g016380.3/Solyc07g045370.3	Solyc04g016380.3;Solyc07g045370.3
GO:0010646	regulation of cell communication	7	7/714	155/10829	0.68	0.892977	0.999454	Solyc03g118540.4/Solyc03g120320.1/Solyc05g008640.1/Solyc05g009170.3/Solyc07g045190.3/Solyc08g077100.3/Solyc12g049400.2	Solyc03g118540.4;Solyc03g120320.1;Solyc05g008640.1;Solyc05g009170.3;Solyc07g045190.3;Solyc08g077100.3;Solyc12g049400.2
GO:0008104	protein localization	4	4/714	98/10829	0.62	0.894677	0.999454	Solyc01g060070.3/Solyc02g080610.4/Solyc03g120260.4/Solyc07g049580.3	Solyc01g060070.3;Solyc02g080610.4;Solyc03g120260.4;Solyc07g049580.3
GO:0016458	gene silencing	1	1/714	33/10829	0.46	0.895055	0.999454	Solyc03g083210.3	Solyc03g083210.3
GO:0031668	cellular response to extracellular stimulus	1	1/714	33/10829	0.46	0.895055	0.999454	Solyc09g091600.4	Solyc09g091600.4
GO:0033044	regulation of chromosome organization	1	1/714	33/10829	0.46	0.895055	0.999454	Solyc03g083210.3	Solyc03g083210.3
GO:0006955	immune response	2	2/714	57/10829	0.53	0.897688	0.999454	Solyc02g077780.3/Solyc08g080670.1	Solyc02g077780.3;Solyc08g080670.1
GO:0051649	establishment of localization in cell	4	4/714	99/10829	0.61	0.899079	0.999454	Solyc01g060070.3/Solyc03g120260.4/Solyc07g049580.3/Solyc07g065680.3	Solyc01g060070.3;Solyc03g120260.4;Solyc07g049580.3;Solyc07g065680.3
GO:0044267	cellular protein metabolic process	15	15/714	301/10829	0.76	0.900224	0.999454	Solyc01g107250.3/Solyc02g093910.3/Solyc03g116480.1/Solyc03g120320.1/Solyc05g007895.1/Solyc05g008640.1/Solyc06g073890.3/Solyc07g045190.3/Solyc08g042100.3/Solyc08g077100.3/Solyc09g065870.4/Solyc10g007000.3/Solyc10g078660.2/Solyc10g083740.3/Solyc11g010440.3	Solyc01g107250.3;Solyc02g093910.3;Solyc03g116480.1;Solyc03g120320.1;Solyc05g007895.1;Solyc05g008640.1;Solyc06g073890.3;Solyc07g045190.3;Solyc08g042100.3;Solyc08g077100.3;Solyc09g065870.4;Solyc10g007000.3;Solyc10g078660.2;Solyc10g083740.3;Solyc11g010440.3
GO:0009890	negative regulation of biosynthetic process	3	3/714	79/10829	0.58	0.900649	0.999454	Solyc03g118540.4/Solyc04g017610.2/Solyc12g049400.2	Solyc03g118540.4;Solyc04g017610.2;Solyc12g049400.2
GO:0031327	negative regulation of cellular biosynthetic process	3	3/714	79/10829	0.58	0.900649	0.999454	Solyc03g118540.4/Solyc04g017610.2/Solyc12g049400.2	Solyc03g118540.4;Solyc04g017610.2;Solyc12g049400.2
GO:0016569	covalent chromatin modification	1	1/714	34/10829	0.45	0.901996	0.999454	Solyc11g010440.3	Solyc11g010440.3
GO:0044270	cellular nitrogen compound catabolic process	1	1/714	34/10829	0.45	0.901996	0.999454	Solyc12g005300.2	Solyc12g005300.2
GO:0046700	heterocycle catabolic process	1	1/714	34/10829	0.45	0.901996	0.999454	Solyc12g005300.2	Solyc12g005300.2
GO:0072594	establishment of protein localization to organelle	1	1/714	34/10829	0.45	0.901996	0.999454	Solyc01g060070.3	Solyc01g060070.3
GO:0043085	positive regulation of catalytic activity	2	2/714	58/10829	0.52	0.903118	0.999454	Solyc02g082690.3/Solyc07g049580.3	Solyc02g082690.3;Solyc07g049580.3
GO:0009892	negative regulation of metabolic process	7	7/714	158/10829	0.67	0.903576	0.999454	Solyc03g083210.3/Solyc03g095780.3/Solyc03g118540.4/Solyc04g017610.2/Solyc08g082180.3/Solyc10g076410.1/Solyc12g049400.2	Solyc03g083210.3;Solyc03g095780.3;Solyc03g118540.4;Solyc04g017610.2;Solyc08g082180.3;Solyc10g076410.1;Solyc12g049400.2
GO:0051641	cellular localization	5	5/714	121/10829	0.63	0.908034	0.999454	Solyc01g060070.3/Solyc02g080610.4/Solyc03g120260.4/Solyc07g049580.3/Solyc07g065680.3	Solyc01g060070.3;Solyc02g080610.4;Solyc03g120260.4;Solyc07g049580.3;Solyc07g065680.3
GO:0006464	cellular protein modification process	11	11/714	233/10829	0.72	0.908246	0.999454	Solyc01g107250.3/Solyc03g116480.1/Solyc05g007895.1/Solyc05g008640.1/Solyc06g073890.3/Solyc07g045190.3/Solyc08g042100.3/Solyc08g077100.3/Solyc09g065870.4/Solyc10g007000.3/Solyc11g010440.3	Solyc01g107250.3;Solyc03g116480.1;Solyc05g007895.1;Solyc05g008640.1;Solyc06g073890.3;Solyc07g045190.3;Solyc08g042100.3;Solyc08g077100.3;Solyc09g065870.4;Solyc10g007000.3;Solyc11g010440.3
GO:0048523	negative regulation of cellular process	11	11/714	233/10829	0.72	0.908246	0.999454	Solyc03g095780.3/Solyc03g118200.4/Solyc03g118540.4/Solyc03g120320.1/Solyc04g017610.2/Solyc05g009170.3/Solyc06g063270.4/Solyc08g042100.3/Solyc08g082180.3/Solyc10g076410.1/Solyc12g049400.2	Solyc03g095780.3;Solyc03g118200.4;Solyc03g118540.4;Solyc03g120320.1;Solyc04g017610.2;Solyc05g009170.3;Solyc06g063270.4;Solyc08g042100.3;Solyc08g082180.3;Solyc10g076410.1;Solyc12g049400.2
GO:0071702	organic substance transport	3	3/714	81/10829	0.56	0.909689	0.999454	Solyc01g060070.3/Solyc03g120260.4/Solyc07g049580.3	Solyc01g060070.3;Solyc03g120260.4;Solyc07g049580.3
GO:0031047	gene silencing by RNA	2	2/714	60/10829	0.51	0.91318	0.999454	Solyc03g083210.3/Solyc11g008530.3	Solyc03g083210.3;Solyc11g008530.3
GO:2000241	regulation of reproductive process	2	2/714	60/10829	0.51	0.91318	0.999454	Solyc01g044558.1/Solyc08g042100.3	Solyc01g044558.1;Solyc08g042100.3
GO:0043900	regulation of multi-organism process	1	1/714	36/10829	0.42	0.914532	0.999454	Solyc03g006050.4	Solyc03g006050.4
GO:0071214	cellular response to abiotic stimulus	1	1/714	36/10829	0.42	0.914532	0.999454	Solyc07g047950.1	Solyc07g047950.1
GO:0016070	RNA metabolic process	24	24/714	463/10829	0.79	0.914549	0.999454	Solyc01g007267.1/Solyc01g088490.3/Solyc02g069500.1/Solyc02g072010.3/Solyc02g085650.4/Solyc03g083210.3/Solyc03g113750.3/Solyc03g116540.1/Solyc04g010050.4/Solyc04g010060.2/Solyc04g016380.3/Solyc04g064660.1/Solyc04g079150.1/Solyc05g006460.3/Solyc05g008330.3/Solyc05g012140.3/Solyc06g009800.3/Solyc06g069700.4/Solyc08g023490.4/Solyc08g078570.3/Solyc08g079640.3/Solyc09g005710.3/Solyc10g007520.3/Solyc11g…	Solyc01g007267.1;Solyc01g088490.3;Solyc02g069500.1;Solyc02g072010.3;Solyc02g085650.4;Solyc03g083210.3;Solyc03g113750.3;Solyc03g116540.1;Solyc04g010050.4;Solyc04g010060.2;Solyc04g016380.3;Solyc04g064660.1;Solyc04g079150.1;Solyc05g006460.3;Solyc05g008330.3;Solyc05g012140.3;Solyc06g009800.3;Solyc06g069700.4;Solyc08g023490.4;Solyc08g078570.3;Solyc08g079640.3;Solyc09g005710.3;Solyc10g007520.3;Solyc11g…
GO:0010557	positive regulation of macromolecule biosynthetic process	2	2/714	61/10829	0.5	0.917835	0.999454	Solyc01g091420.2/Solyc07g063350.3	Solyc01g091420.2;Solyc07g063350.3
GO:0045935	positive regulation of nucleobase-containing compound metabolic process	2	2/714	61/10829	0.5	0.917835	0.999454	Solyc01g091420.2/Solyc07g063350.3	Solyc01g091420.2;Solyc07g063350.3
GO:0006996	organelle organization	11	11/714	237/10829	0.7	0.918621	0.999454	Solyc01g044558.1/Solyc01g060070.3/Solyc01g096840.3/Solyc01g107250.3/Solyc04g016380.3/Solyc06g075640.2/Solyc07g065680.3/Solyc09g091600.4/Solyc10g078660.2/Solyc10g083740.3/Solyc11g010440.3	Solyc01g044558.1;Solyc01g060070.3;Solyc01g096840.3;Solyc01g107250.3;Solyc04g016380.3;Solyc06g075640.2;Solyc07g065680.3;Solyc09g091600.4;Solyc10g078660.2;Solyc10g083740.3;Solyc11g010440.3
GO:0006334	nucleosome assembly	1	1/714	37/10829	0.41	0.920186	0.999454	Solyc01g106940.4	Solyc01g106940.4
GO:0009991	response to extracellular stimulus	1	1/714	37/10829	0.41	0.920186	0.999454	Solyc09g091600.4	Solyc09g091600.4
GO:0071554	cell wall organization or biogenesis	1	1/714	37/10829	0.41	0.920186	0.999454	Solyc12g013750.2	Solyc12g013750.2
GO:0044237	cellular metabolic process	55	55/714	983/10829	0.85	0.920234	0.999454	Solyc01g007267.1/Solyc01g088490.3/Solyc01g095670.4/Solyc01g107250.3/Solyc02g069500.1/Solyc02g072010.3/Solyc02g078410.1/Solyc02g085650.4/Solyc02g093910.3/Solyc03g083190.3/Solyc03g083210.3/Solyc03g098460.3/Solyc03g113750.3/Solyc03g116480.1/Solyc03g116540.1/Solyc03g120320.1/Solyc04g010050.4/Solyc04g010060.2/Solyc04g016380.3/Solyc04g064660.1/Solyc04g077860.4/Solyc04g079150.1/Solyc05g006460.3/Solyc05g…	Solyc01g007267.1;Solyc01g088490.3;Solyc01g095670.4;Solyc01g107250.3;Solyc02g069500.1;Solyc02g072010.3;Solyc02g078410.1;Solyc02g085650.4;Solyc02g093910.3;Solyc03g083190.3;Solyc03g083210.3;Solyc03g098460.3;Solyc03g113750.3;Solyc03g116480.1;Solyc03g116540.1;Solyc03g120320.1;Solyc04g010050.4;Solyc04g010060.2;Solyc04g016380.3;Solyc04g064660.1;Solyc04g077860.4;Solyc04g079150.1;Solyc05g006460.3;Solyc05g…
GO:0003002	regionalization	2	2/714	62/10829	0.49	0.922256	0.999454	Solyc03g063140.4/Solyc03g112750.4	Solyc03g063140.4;Solyc03g112750.4
GO:0006793	phosphorus metabolic process	2	2/714	62/10829	0.49	0.922256	0.999454	Solyc01g107250.3/Solyc11g069780.3	Solyc01g107250.3;Solyc11g069780.3
GO:1902679	negative regulation of RNA biosynthetic process	2	2/714	62/10829	0.49	0.922256	0.999454	Solyc03g118540.4/Solyc12g049400.2	Solyc03g118540.4;Solyc12g049400.2
GO:1903507	negative regulation of nucleic acid-templated transcription	2	2/714	62/10829	0.49	0.922256	0.999454	Solyc03g118540.4/Solyc12g049400.2	Solyc03g118540.4;Solyc12g049400.2
GO:0010605	negative regulation of macromolecule metabolic process	6	6/714	145/10829	0.63	0.922843	0.999454	Solyc03g083210.3/Solyc03g095780.3/Solyc03g118540.4/Solyc08g082180.3/Solyc10g076410.1/Solyc12g049400.2	Solyc03g083210.3;Solyc03g095780.3;Solyc03g118540.4;Solyc08g082180.3;Solyc10g076410.1;Solyc12g049400.2
GO:0019538	protein metabolic process	15	15/714	311/10829	0.73	0.92347	0.999454	Solyc01g107250.3/Solyc02g093910.3/Solyc03g116480.1/Solyc03g120320.1/Solyc05g007895.1/Solyc05g008640.1/Solyc06g073890.3/Solyc07g045190.3/Solyc08g042100.3/Solyc08g077100.3/Solyc09g065870.4/Solyc10g007000.3/Solyc10g078660.2/Solyc10g083740.3/Solyc11g010440.3	Solyc01g107250.3;Solyc02g093910.3;Solyc03g116480.1;Solyc03g120320.1;Solyc05g007895.1;Solyc05g008640.1;Solyc06g073890.3;Solyc07g045190.3;Solyc08g042100.3;Solyc08g077100.3;Solyc09g065870.4;Solyc10g007000.3;Solyc10g078660.2;Solyc10g083740.3;Solyc11g010440.3
GO:0016570	histone modification	1	1/714	38/10829	0.4	0.925467	0.999454	Solyc11g010440.3	Solyc11g010440.3
GO:0009691	cytokinin biosynthetic process	2	2/714	63/10829	0.48	0.926451	0.999454	Solyc09g064910.1/Solyc10g082020.2	Solyc09g064910.1;Solyc10g082020.2
GO:0016192	vesicle-mediated transport	7	7/714	167/10829	0.64	0.930159	0.999454	Solyc01g006950.3/Solyc01g007150.3/Solyc02g085240.4/Solyc03g120260.4/Solyc04g026360.3/Solyc05g052310.3/Solyc08g007510.3	Solyc01g006950.3;Solyc01g007150.3;Solyc02g085240.4;Solyc03g120260.4;Solyc04g026360.3;Solyc05g052310.3;Solyc08g007510.3
GO:0006310	DNA recombination	2	2/714	64/10829	0.47	0.930432	0.999454	Solyc03g083190.3/Solyc10g078730.2	Solyc03g083190.3;Solyc10g078730.2
GO:0032879	regulation of localization	3	3/714	87/10829	0.52	0.932504	0.999454	Solyc02g082690.3/Solyc07g049580.3/Solyc07g056650.4	Solyc02g082690.3;Solyc07g049580.3;Solyc07g056650.4
GO:0051253	negative regulation of RNA metabolic process	2	2/714	65/10829	0.47	0.934209	0.999454	Solyc03g118540.4/Solyc12g049400.2	Solyc03g118540.4;Solyc12g049400.2
GO:0006807	nitrogen compound metabolic process	49	49/714	896/10829	0.83	0.934438	0.999454	Solyc01g007267.1/Solyc01g088490.3/Solyc01g095670.4/Solyc01g107250.3/Solyc02g069500.1/Solyc02g072010.3/Solyc02g085650.4/Solyc02g093910.3/Solyc03g083190.3/Solyc03g083210.3/Solyc03g113750.3/Solyc03g116480.1/Solyc03g116540.1/Solyc03g120320.1/Solyc04g010050.4/Solyc04g010060.2/Solyc04g016380.3/Solyc04g064660.1/Solyc04g079150.1/Solyc05g006460.3/Solyc05g007895.1/Solyc05g008330.3/Solyc05g008640.1/Solyc05g…	Solyc01g007267.1;Solyc01g088490.3;Solyc01g095670.4;Solyc01g107250.3;Solyc02g069500.1;Solyc02g072010.3;Solyc02g085650.4;Solyc02g093910.3;Solyc03g083190.3;Solyc03g083210.3;Solyc03g113750.3;Solyc03g116480.1;Solyc03g116540.1;Solyc03g120320.1;Solyc04g010050.4;Solyc04g010060.2;Solyc04g016380.3;Solyc04g064660.1;Solyc04g079150.1;Solyc05g006460.3;Solyc05g007895.1;Solyc05g008330.3;Solyc05g008640.1;Solyc05g…
GO:0000226	microtubule cytoskeleton organization	1	1/714	40/10829	0.38	0.935004	0.999454	Solyc01g096840.3	Solyc01g096840.3
GO:0019439	aromatic compound catabolic process	1	1/714	40/10829	0.38	0.935004	0.999454	Solyc12g005300.2	Solyc12g005300.2
GO:0022603	regulation of anatomical structure morphogenesis	1	1/714	40/10829	0.38	0.935004	0.999454	Solyc03g123400.1	Solyc03g123400.1
GO:1901361	organic cyclic compound catabolic process	1	1/714	40/10829	0.38	0.935004	0.999454	Solyc12g005300.2	Solyc12g005300.2
GO:0016043	cellular component organization	17	17/714	353/10829	0.73	0.935681	0.999454	Solyc01g044558.1/Solyc01g060070.3/Solyc01g096840.3/Solyc01g107250.3/Solyc02g078410.1/Solyc02g080230.3/Solyc03g118200.4/Solyc04g016380.3/Solyc05g007895.1/Solyc05g009170.3/Solyc06g075640.2/Solyc07g063850.3/Solyc07g065680.3/Solyc09g091600.4/Solyc10g078660.2/Solyc10g083740.3/Solyc11g010440.3	Solyc01g044558.1;Solyc01g060070.3;Solyc01g096840.3;Solyc01g107250.3;Solyc02g078410.1;Solyc02g080230.3;Solyc03g118200.4;Solyc04g016380.3;Solyc05g007895.1;Solyc05g009170.3;Solyc06g075640.2;Solyc07g063850.3;Solyc07g065680.3;Solyc09g091600.4;Solyc10g078660.2;Solyc10g083740.3;Solyc11g010440.3
GO:0006357	regulation of transcription from RNA polymerase II promoter	4	4/714	110/10829	0.55	0.937759	0.999454	Solyc03g006910.3/Solyc06g074120.3/Solyc07g032480.3/Solyc10g008270.3	Solyc03g006910.3;Solyc06g074120.3;Solyc07g032480.3;Solyc10g008270.3
GO:0009893	positive regulation of metabolic process	4	4/714	110/10829	0.55	0.937759	0.999454	Solyc01g091420.2/Solyc07g063350.3/Solyc07g063850.3/Solyc09g011030.3	Solyc01g091420.2;Solyc07g063350.3;Solyc07g063850.3;Solyc09g011030.3
GO:0009968	negative regulation of signal transduction	2	2/714	66/10829	0.46	0.937791	0.999454	Solyc03g120320.1/Solyc05g009170.3	Solyc03g120320.1;Solyc05g009170.3
GO:0071496	cellular response to external stimulus	1	1/714	41/10829	0.37	0.939305	0.999454	Solyc09g091600.4	Solyc09g091600.4
GO:0006260	DNA replication	2	2/714	67/10829	0.45	0.941188	0.999454	Solyc05g014540.3/Solyc06g073500.3	Solyc05g014540.3;Solyc06g073500.3
GO:0010648	negative regulation of cell communication	2	2/714	67/10829	0.45	0.941188	0.999454	Solyc03g120320.1/Solyc05g009170.3	Solyc03g120320.1;Solyc05g009170.3
GO:0023057	negative regulation of signaling	2	2/714	67/10829	0.45	0.941188	0.999454	Solyc03g120320.1/Solyc05g009170.3	Solyc03g120320.1;Solyc05g009170.3
GO:0009987	cellular process	77	77/714	1361/10829	0.86	0.941259	0.999454	Solyc01g007267.1/Solyc01g044556.1/Solyc01g044558.1/Solyc01g060070.3/Solyc01g088490.3/Solyc01g095670.4/Solyc01g096840.3/Solyc01g107250.3/Solyc02g069500.1/Solyc02g071830.3/Solyc02g072010.3/Solyc02g077780.3/Solyc02g078410.1/Solyc02g080230.3/Solyc02g080610.4/Solyc02g085650.4/Solyc02g093910.3/Solyc03g083190.3/Solyc03g083210.3/Solyc03g095780.3/Solyc03g098460.3/Solyc03g112750.4/Solyc03g113750.3/Solyc03g…	Solyc01g007267.1;Solyc01g044556.1;Solyc01g044558.1;Solyc01g060070.3;Solyc01g088490.3;Solyc01g095670.4;Solyc01g096840.3;Solyc01g107250.3;Solyc02g069500.1;Solyc02g071830.3;Solyc02g072010.3;Solyc02g077780.3;Solyc02g078410.1;Solyc02g080230.3;Solyc02g080610.4;Solyc02g085650.4;Solyc02g093910.3;Solyc03g083190.3;Solyc03g083210.3;Solyc03g095780.3;Solyc03g098460.3;Solyc03g112750.4;Solyc03g113750.3;Solyc03g…
GO:0046483	heterocycle metabolic process	29	29/714	566/10829	0.78	0.941757	0.999454	Solyc01g007267.1/Solyc01g088490.3/Solyc02g069500.1/Solyc02g072010.3/Solyc02g085650.4/Solyc03g083190.3/Solyc03g083210.3/Solyc03g113750.3/Solyc03g116540.1/Solyc04g010050.4/Solyc04g010060.2/Solyc04g016380.3/Solyc04g064660.1/Solyc04g077860.4/Solyc04g079150.1/Solyc05g006460.3/Solyc05g008330.3/Solyc05g012140.3/Solyc06g009800.3/Solyc06g069700.4/Solyc07g063350.3/Solyc07g063850.3/Solyc08g023490.4/Solyc08g…	Solyc01g007267.1;Solyc01g088490.3;Solyc02g069500.1;Solyc02g072010.3;Solyc02g085650.4;Solyc03g083190.3;Solyc03g083210.3;Solyc03g113750.3;Solyc03g116540.1;Solyc04g010050.4;Solyc04g010060.2;Solyc04g016380.3;Solyc04g064660.1;Solyc04g077860.4;Solyc04g079150.1;Solyc05g006460.3;Solyc05g008330.3;Solyc05g012140.3;Solyc06g009800.3;Solyc06g069700.4;Solyc07g063350.3;Solyc07g063850.3;Solyc08g023490.4;Solyc08g…
GO:0006520	cellular amino acid metabolic process	1	1/714	42/10829	0.36	0.943322	0.999454	Solyc05g052100.3	Solyc05g052100.3
GO:0010243	response to organonitrogen compound	1	1/714	42/10829	0.36	0.943322	0.999454	Solyc07g045190.3	Solyc07g045190.3
GO:1901360	organic cyclic compound metabolic process	30	30/714	586/10829	0.78	0.945295	0.999454	Solyc01g007267.1/Solyc01g088490.3/Solyc02g069500.1/Solyc02g072010.3/Solyc02g085650.4/Solyc03g083190.3/Solyc03g083210.3/Solyc03g113750.3/Solyc03g116540.1/Solyc04g010050.4/Solyc04g010060.2/Solyc04g016380.3/Solyc04g064660.1/Solyc04g077860.4/Solyc04g079150.1/Solyc05g006460.3/Solyc05g008330.3/Solyc05g012140.3/Solyc06g009800.3/Solyc06g069700.4/Solyc07g063350.3/Solyc07g063850.3/Solyc08g023490.4/Solyc08g…	Solyc01g007267.1;Solyc01g088490.3;Solyc02g069500.1;Solyc02g072010.3;Solyc02g085650.4;Solyc03g083190.3;Solyc03g083210.3;Solyc03g113750.3;Solyc03g116540.1;Solyc04g010050.4;Solyc04g010060.2;Solyc04g016380.3;Solyc04g064660.1;Solyc04g077860.4;Solyc04g079150.1;Solyc05g006460.3;Solyc05g008330.3;Solyc05g012140.3;Solyc06g009800.3;Solyc06g069700.4;Solyc07g063350.3;Solyc07g063850.3;Solyc08g023490.4;Solyc08g…
GO:0040008	regulation of growth	1	1/714	43/10829	0.35	0.947074	0.999454	Solyc03g043770.4	Solyc03g043770.4
GO:0010628	positive regulation of gene expression	2	2/714	69/10829	0.44	0.94746	0.999454	Solyc01g091420.2/Solyc07g063350.3	Solyc01g091420.2;Solyc07g063350.3
GO:0071840	cellular component organization or biogenesis	18	18/714	380/10829	0.72	0.949706	0.999454	Solyc01g044558.1/Solyc01g060070.3/Solyc01g096840.3/Solyc01g107250.3/Solyc02g078410.1/Solyc02g080230.3/Solyc03g118200.4/Solyc04g016380.3/Solyc05g007895.1/Solyc05g009170.3/Solyc06g075640.2/Solyc07g063850.3/Solyc07g065680.3/Solyc08g006470.4/Solyc09g091600.4/Solyc10g078660.2/Solyc10g083740.3/Solyc11g010440.3	Solyc01g044558.1;Solyc01g060070.3;Solyc01g096840.3;Solyc01g107250.3;Solyc02g078410.1;Solyc02g080230.3;Solyc03g118200.4;Solyc04g016380.3;Solyc05g007895.1;Solyc05g009170.3;Solyc06g075640.2;Solyc07g063850.3;Solyc07g065680.3;Solyc08g006470.4;Solyc09g091600.4;Solyc10g078660.2;Solyc10g083740.3;Solyc11g010440.3
GO:0006259	DNA metabolic process	2	2/714	70/10829	0.43	0.950351	0.999454	Solyc03g083190.3/Solyc03g083210.3	Solyc03g083190.3;Solyc03g083210.3
GO:0042445	hormone metabolic process	2	2/714	70/10829	0.43	0.950351	0.999454	Solyc03g098460.3/Solyc04g077860.4	Solyc03g098460.3;Solyc04g077860.4
GO:0010558	negative regulation of macromolecule biosynthetic process	2	2/714	71/10829	0.43	0.953091	0.999454	Solyc03g118540.4/Solyc12g049400.2	Solyc03g118540.4;Solyc12g049400.2
GO:0045934	negative regulation of nucleobase-containing compound metabolic process	2	2/714	71/10829	0.43	0.953091	0.999454	Solyc03g118540.4/Solyc12g049400.2	Solyc03g118540.4;Solyc12g049400.2
GO:0048519	negative regulation of biological process	13	13/714	292/10829	0.68	0.953496	0.999454	Solyc02g078030.3/Solyc03g083210.3/Solyc03g095780.3/Solyc03g118200.4/Solyc03g118540.4/Solyc03g120320.1/Solyc04g017610.2/Solyc05g009170.3/Solyc06g063270.4/Solyc08g042100.3/Solyc08g082180.3/Solyc10g076410.1/Solyc12g049400.2	Solyc02g078030.3;Solyc03g083210.3;Solyc03g095780.3;Solyc03g118200.4;Solyc03g118540.4;Solyc03g120320.1;Solyc04g017610.2;Solyc05g009170.3;Solyc06g063270.4;Solyc08g042100.3;Solyc08g082180.3;Solyc10g076410.1;Solyc12g049400.2
GO:0009793	embryo development ending in seed dormancy	3	3/714	95/10829	0.48	0.954705	0.999454	Solyc01g107250.3/Solyc08g023490.4/Solyc11g017470.2	Solyc01g107250.3;Solyc08g023490.4;Solyc11g017470.2
GO:0010604	positive regulation of macromolecule metabolic process	3	3/714	95/10829	0.48	0.954705	0.999454	Solyc01g091420.2/Solyc07g063350.3/Solyc09g011030.3	Solyc01g091420.2;Solyc07g063350.3;Solyc09g011030.3
GO:0046907	intracellular transport	3	3/714	95/10829	0.48	0.954705	0.999454	Solyc01g060070.3/Solyc03g120260.4/Solyc07g049580.3	Solyc01g060070.3;Solyc03g120260.4;Solyc07g049580.3
GO:2000026	regulation of multicellular organismal development	4	4/714	117/10829	0.52	0.954783	0.999454	Solyc03g123400.1/Solyc06g084320.1/Solyc08g042100.3/Solyc09g064820.1	Solyc03g123400.1;Solyc06g084320.1;Solyc08g042100.3;Solyc09g064820.1
GO:0044093	positive regulation of molecular function	2	2/714	72/10829	0.42	0.955686	0.999454	Solyc02g082690.3/Solyc07g049580.3	Solyc02g082690.3;Solyc07g049580.3
GO:0006725	cellular aromatic compound metabolic process	29	29/714	580/10829	0.76	0.95748	0.999454	Solyc01g007267.1/Solyc01g088490.3/Solyc02g069500.1/Solyc02g072010.3/Solyc02g085650.4/Solyc03g083190.3/Solyc03g083210.3/Solyc03g113750.3/Solyc03g116540.1/Solyc04g010050.4/Solyc04g010060.2/Solyc04g016380.3/Solyc04g064660.1/Solyc04g079150.1/Solyc05g006460.3/Solyc05g008330.3/Solyc05g012140.3/Solyc06g009800.3/Solyc06g069700.4/Solyc07g063350.3/Solyc07g063850.3/Solyc08g023490.4/Solyc08g078570.3/Solyc08g…	Solyc01g007267.1;Solyc01g088490.3;Solyc02g069500.1;Solyc02g072010.3;Solyc02g085650.4;Solyc03g083190.3;Solyc03g083210.3;Solyc03g113750.3;Solyc03g116540.1;Solyc04g010050.4;Solyc04g010060.2;Solyc04g016380.3;Solyc04g064660.1;Solyc04g079150.1;Solyc05g006460.3;Solyc05g008330.3;Solyc05g012140.3;Solyc06g009800.3;Solyc06g069700.4;Solyc07g063350.3;Solyc07g063850.3;Solyc08g023490.4;Solyc08g078570.3;Solyc08g…
GO:0007389	pattern specification process	2	2/714	73/10829	0.42	0.958143	0.999454	Solyc03g063140.4/Solyc03g112750.4	Solyc03g063140.4;Solyc03g112750.4
GO:0006139	nucleobase-containing compound metabolic process	27	27/714	548/10829	0.75	0.96016	0.999454	Solyc01g007267.1/Solyc01g088490.3/Solyc02g069500.1/Solyc02g072010.3/Solyc02g085650.4/Solyc02g093990.4/Solyc03g005050.3/Solyc03g083190.3/Solyc03g083210.3/Solyc03g113750.3/Solyc03g116540.1/Solyc04g010050.4/Solyc04g010060.2/Solyc04g016380.3/Solyc04g064660.1/Solyc04g079150.1/Solyc05g006460.3/Solyc05g008330.3/Solyc05g012140.3/Solyc06g009800.3/Solyc06g069700.4/Solyc08g023490.4/Solyc08g078570.3/Solyc08g…	Solyc01g007267.1;Solyc01g088490.3;Solyc02g069500.1;Solyc02g072010.3;Solyc02g085650.4;Solyc02g093990.4;Solyc03g005050.3;Solyc03g083190.3;Solyc03g083210.3;Solyc03g113750.3;Solyc03g116540.1;Solyc04g010050.4;Solyc04g010060.2;Solyc04g016380.3;Solyc04g064660.1;Solyc04g079150.1;Solyc05g006460.3;Solyc05g008330.3;Solyc05g012140.3;Solyc06g009800.3;Solyc06g069700.4;Solyc08g023490.4;Solyc08g078570.3;Solyc08g…
GO:0090304	nucleic acid metabolic process	25	25/714	516/10829	0.73	0.963017	0.999454	Solyc01g007267.1/Solyc01g088490.3/Solyc02g069500.1/Solyc02g072010.3/Solyc02g085650.4/Solyc03g083190.3/Solyc03g083210.3/Solyc03g113750.3/Solyc03g116540.1/Solyc04g010050.4/Solyc04g010060.2/Solyc04g016380.3/Solyc04g064660.1/Solyc04g079150.1/Solyc05g006460.3/Solyc05g008330.3/Solyc05g012140.3/Solyc06g009800.3/Solyc06g069700.4/Solyc08g023490.4/Solyc08g078570.3/Solyc08g079640.3/Solyc09g005710.3/Solyc10g…	Solyc01g007267.1;Solyc01g088490.3;Solyc02g069500.1;Solyc02g072010.3;Solyc02g085650.4;Solyc03g083190.3;Solyc03g083210.3;Solyc03g113750.3;Solyc03g116540.1;Solyc04g010050.4;Solyc04g010060.2;Solyc04g016380.3;Solyc04g064660.1;Solyc04g079150.1;Solyc05g006460.3;Solyc05g008330.3;Solyc05g012140.3;Solyc06g009800.3;Solyc06g069700.4;Solyc08g023490.4;Solyc08g078570.3;Solyc08g079640.3;Solyc09g005710.3;Solyc10g…
GO:0000278	mitotic cell cycle	1	1/714	49/10829	0.31	0.964912	0.999454	Solyc01g086690.2	Solyc01g086690.2
GO:0048522	positive regulation of cellular process	7	7/714	186/10829	0.57	0.966155	0.999454	Solyc01g091420.2/Solyc02g082690.3/Solyc05g008640.1/Solyc07g045190.3/Solyc07g063350.3/Solyc07g063850.3/Solyc09g011030.3	Solyc01g091420.2;Solyc02g082690.3;Solyc05g008640.1;Solyc07g045190.3;Solyc07g063350.3;Solyc07g063850.3;Solyc09g011030.3
GO:0033043	regulation of organelle organization	2	2/714	77/10829	0.39	0.966728	0.999454	Solyc03g083210.3/Solyc07g049580.3	Solyc03g083210.3;Solyc07g049580.3
GO:0008380	RNA splicing	1	1/714	50/10829	0.3	0.967236	0.999454	Solyc03g113750.3	Solyc03g113750.3
GO:0022607	cellular component assembly	4	4/714	124/10829	0.49	0.967422	0.999454	Solyc02g078410.1/Solyc04g016380.3/Solyc10g078660.2/Solyc10g083740.3	Solyc02g078410.1;Solyc04g016380.3;Solyc10g078660.2;Solyc10g083740.3
GO:0043170	macromolecule metabolic process	42	42/714	817/10829	0.78	0.968578	0.999454	Solyc01g007267.1/Solyc01g088490.3/Solyc01g095670.4/Solyc01g107250.3/Solyc02g069500.1/Solyc02g072010.3/Solyc02g085650.4/Solyc02g093910.3/Solyc03g083190.3/Solyc03g083210.3/Solyc03g113750.3/Solyc03g116480.1/Solyc03g116540.1/Solyc03g120320.1/Solyc04g010050.4/Solyc04g010060.2/Solyc04g016380.3/Solyc04g064660.1/Solyc04g079150.1/Solyc05g006460.3/Solyc05g007895.1/Solyc05g008330.3/Solyc05g008640.1/Solyc05g…	Solyc01g007267.1;Solyc01g088490.3;Solyc01g095670.4;Solyc01g107250.3;Solyc02g069500.1;Solyc02g072010.3;Solyc02g085650.4;Solyc02g093910.3;Solyc03g083190.3;Solyc03g083210.3;Solyc03g113750.3;Solyc03g116480.1;Solyc03g116540.1;Solyc03g120320.1;Solyc04g010050.4;Solyc04g010060.2;Solyc04g016380.3;Solyc04g064660.1;Solyc04g079150.1;Solyc05g006460.3;Solyc05g007895.1;Solyc05g008330.3;Solyc05g008640.1;Solyc05g…
GO:0015074	DNA integration	3	3/714	105/10829	0.43	0.972896	0.999454	Solanum_lycopersicum_newGene_2721/Solanum_lycopersicum_newGene_2979/Solyc03g150117.1	--;--;Solyc03g150117.1
GO:0048518	positive regulation of biological process	9	9/714	233/10829	0.59	0.974149	0.999454	Solyc01g091420.2/Solyc02g082690.3/Solyc03g006050.4/Solyc05g008640.1/Solyc07g045190.3/Solyc07g063350.3/Solyc07g063850.3/Solyc09g011030.3/Solyc11g005720.1	Solyc01g091420.2;Solyc02g082690.3;Solyc03g006050.4;Solyc05g008640.1;Solyc07g045190.3;Solyc07g063350.3;Solyc07g063850.3;Solyc09g011030.3;Solyc11g005720.1
GO:0050793	regulation of developmental process	5	5/714	152/10829	0.5	0.975534	0.999454	Solyc03g043770.4/Solyc03g123400.1/Solyc06g084320.1/Solyc08g042100.3/Solyc09g064820.1	Solyc03g043770.4;Solyc03g123400.1;Solyc06g084320.1;Solyc08g042100.3;Solyc09g064820.1
GO:0006974	cellular response to DNA damage stimulus	1	1/714	55/10829	0.28	0.976743	0.999454	Solyc03g083190.3	Solyc03g083190.3
GO:1901698	response to nitrogen compound	1	1/714	55/10829	0.28	0.976743	0.999454	Solyc07g045190.3	Solyc07g045190.3
GO:0010468	regulation of gene expression	15	15/714	353/10829	0.64	0.977843	0.999454	Solyc01g087050.3/Solyc01g091420.2/Solyc02g062670.3/Solyc02g078030.3/Solyc02g092570.1/Solyc03g083210.3/Solyc03g116480.1/Solyc03g123400.1/Solyc04g056320.3/Solyc05g009170.3/Solyc07g043330.3/Solyc07g047950.1/Solyc07g063350.3/Solyc08g006470.4/Solyc11g012510.3	Solyc01g087050.3;Solyc01g091420.2;Solyc02g062670.3;Solyc02g078030.3;Solyc02g092570.1;Solyc03g083210.3;Solyc03g116480.1;Solyc03g123400.1;Solyc04g056320.3;Solyc05g009170.3;Solyc07g043330.3;Solyc07g047950.1;Solyc07g063350.3;Solyc08g006470.4;Solyc11g012510.3
GO:0034754	cellular hormone metabolic process	1	1/714	56/10829	0.27	0.978285	0.999454	Solyc03g098460.3	Solyc03g098460.3
GO:0044085	cellular component biogenesis	5	5/714	155/10829	0.49	0.978649	0.999454	Solyc02g078410.1/Solyc04g016380.3/Solyc08g006470.4/Solyc10g078660.2/Solyc10g083740.3	Solyc02g078410.1;Solyc04g016380.3;Solyc08g006470.4;Solyc10g078660.2;Solyc10g083740.3
GO:0009059	macromolecule biosynthetic process	2	2/714	85/10829	0.36	0.979101	0.999454	Solyc10g078660.2/Solyc10g083740.3	Solyc10g078660.2;Solyc10g083740.3
GO:0034645	cellular macromolecule biosynthetic process	2	2/714	85/10829	0.36	0.979101	0.999454	Solyc10g078660.2/Solyc10g083740.3	Solyc10g078660.2;Solyc10g083740.3
GO:0044249	cellular biosynthetic process	7	7/714	198/10829	0.54	0.979155	0.999454	Solyc02g078410.1/Solyc04g077860.4/Solyc07g063350.3/Solyc07g063850.3/Solyc10g052510.2/Solyc10g078660.2/Solyc10g083740.3	Solyc02g078410.1;Solyc04g077860.4;Solyc07g063350.3;Solyc07g063850.3;Solyc10g052510.2;Solyc10g078660.2;Solyc10g083740.3
GO:0051239	regulation of multicellular organismal process	4	4/714	135/10829	0.45	0.980828	0.999454	Solyc03g123400.1/Solyc06g084320.1/Solyc08g042100.3/Solyc09g064820.1	Solyc03g123400.1;Solyc06g084320.1;Solyc08g042100.3;Solyc09g064820.1
GO:0044238	primary metabolic process	44	44/714	876/10829	0.76	0.981508	0.999454	Solyc01g007267.1/Solyc01g088490.3/Solyc01g107250.3/Solyc02g069500.1/Solyc02g072010.3/Solyc02g085650.4/Solyc02g093910.3/Solyc03g083190.3/Solyc03g083210.3/Solyc03g098460.3/Solyc03g113750.3/Solyc03g116480.1/Solyc03g116540.1/Solyc03g119980.3/Solyc03g120320.1/Solyc04g010050.4/Solyc04g010060.2/Solyc04g016380.3/Solyc04g064660.1/Solyc04g077860.4/Solyc04g079150.1/Solyc05g006460.3/Solyc05g007895.1/Solyc05g…	Solyc01g007267.1;Solyc01g088490.3;Solyc01g107250.3;Solyc02g069500.1;Solyc02g072010.3;Solyc02g085650.4;Solyc02g093910.3;Solyc03g083190.3;Solyc03g083210.3;Solyc03g098460.3;Solyc03g113750.3;Solyc03g116480.1;Solyc03g116540.1;Solyc03g119980.3;Solyc03g120320.1;Solyc04g010050.4;Solyc04g010060.2;Solyc04g016380.3;Solyc04g064660.1;Solyc04g077860.4;Solyc04g079150.1;Solyc05g006460.3;Solyc05g007895.1;Solyc05g…
GO:0007010	cytoskeleton organization	1	1/714	59/10829	0.26	0.982323	0.999454	Solyc01g096840.3	Solyc01g096840.3
GO:0042446	hormone biosynthetic process	1	1/714	60/10829	0.25	0.983495	0.999454	Solyc04g077860.4	Solyc04g077860.4
GO:0044260	cellular macromolecule metabolic process	18	18/714	419/10829	0.65	0.983685	0.999454	Solyc01g107250.3/Solyc02g093910.3/Solyc03g083190.3/Solyc03g083210.3/Solyc03g116480.1/Solyc03g120320.1/Solyc05g007895.1/Solyc05g008640.1/Solyc06g073890.3/Solyc07g045190.3/Solyc08g042100.3/Solyc08g077100.3/Solyc09g065870.4/Solyc10g007000.3/Solyc10g078660.2/Solyc10g083740.3/Solyc11g010440.3/Solyc12g013750.2	Solyc01g107250.3;Solyc02g093910.3;Solyc03g083190.3;Solyc03g083210.3;Solyc03g116480.1;Solyc03g120320.1;Solyc05g007895.1;Solyc05g008640.1;Solyc06g073890.3;Solyc07g045190.3;Solyc08g042100.3;Solyc08g077100.3;Solyc09g065870.4;Solyc10g007000.3;Solyc10g078660.2;Solyc10g083740.3;Solyc11g010440.3;Solyc12g013750.2
GO:0006396	RNA processing	8	8/714	226/10829	0.54	0.984529	0.999454	Solyc01g009670.4/Solyc02g081810.4/Solyc02g083140.3/Solyc02g086590.3/Solyc03g113750.3/Solyc04g016380.3/Solyc10g006200.4/Solyc11g008530.3	Solyc01g009670.4;Solyc02g081810.4;Solyc02g083140.3;Solyc02g086590.3;Solyc03g113750.3;Solyc04g016380.3;Solyc10g006200.4;Solyc11g008530.3
GO:0009308	amine metabolic process	1	1/714	62/10829	0.24	0.985611	0.999454	Solyc05g013440.3	Solyc05g013440.3
GO:0016579	protein deubiquitination	1	1/714	62/10829	0.24	0.985611	0.999454	Solyc04g076210.3	Solyc04g076210.3
GO:0018298	protein-chromophore linkage	1	1/714	63/10829	0.24	0.986565	0.999454	Solyc12g009200.2	Solyc12g009200.2
GO:0015031	protein transport	7	7/714	210/10829	0.51	0.9874	0.999454	Solyc01g060070.3/Solyc02g072130.3/Solyc02g083130.4/Solyc03g120260.4/Solyc07g049580.3/Solyc08g007340.3/Solyc10g009170.2	Solyc01g060070.3;Solyc02g072130.3;Solyc02g083130.4;Solyc03g120260.4;Solyc07g049580.3;Solyc08g007340.3;Solyc10g009170.2
GO:0009690	cytokinin metabolic process	1	1/714	64/10829	0.24	0.987456	0.999454	Solyc04g080820.2	Solyc04g080820.2
GO:0009790	embryo development	2	2/714	99/10829	0.31	0.990886	0.999454	Solyc01g107250.3/Solyc08g023490.4	Solyc01g107250.3;Solyc08g023490.4
GO:0045892	negative regulation of transcription, DNA-templated	2	2/714	99/10829	0.31	0.990886	0.999454	Solyc02g072030.1/Solyc09g065350.1	Solyc02g072030.1;Solyc09g065350.1
GO:0051179	localization	7	7/714	218/10829	0.49	0.991077	0.999454	Solyc01g060070.3/Solyc02g077780.3/Solyc02g080610.4/Solyc03g112750.4/Solyc03g120260.4/Solyc07g049580.3/Solyc07g065680.3	Solyc01g060070.3;Solyc02g077780.3;Solyc02g080610.4;Solyc03g112750.4;Solyc03g120260.4;Solyc07g049580.3;Solyc07g065680.3
GO:0033554	cellular response to stress	4	4/714	151/10829	0.4	0.991384	0.999454	Solyc02g077780.3/Solyc03g083190.3/Solyc05g007895.1/Solyc09g091600.4	Solyc02g077780.3;Solyc03g083190.3;Solyc05g007895.1;Solyc09g091600.4
GO:0000398	mRNA splicing, via spliceosome	1	1/714	70/10829	0.22	0.991691	0.999454	Solyc01g108430.3	Solyc01g108430.3
GO:0035556	intracellular signal transduction	1	1/714	74/10829	0.2	0.993687	0.999454	Solyc01g008130.4	Solyc01g008130.4
GO:0006351	transcription, DNA-templated	5	5/714	181/10829	0.42	0.993749	0.999454	Solyc04g082450.3/Solyc08g067790.4/Solyc08g083230.3/Solyc11g072730.2/Solyc12g096070.2	Solyc04g082450.3;Solyc08g067790.4;Solyc08g083230.3;Solyc11g072730.2;Solyc12g096070.2
GO:0051234	establishment of localization	5	5/714	183/10829	0.41	0.994331	0.999454	Solyc01g060070.3/Solyc03g112750.4/Solyc03g120260.4/Solyc07g049580.3/Solyc07g065680.3	Solyc01g060070.3;Solyc03g112750.4;Solyc03g120260.4;Solyc07g049580.3;Solyc07g065680.3
GO:0008033	tRNA processing	2	2/714	107/10829	0.28	0.994372	0.999454	Solyc09g064910.1/Solyc12g044370.3	Solyc09g064910.1;Solyc12g044370.3
GO:0015986	ATP synthesis coupled proton transport	1	1/714	76/10829	0.2	0.994497	0.999454	Solyc12g005060.1	Solyc12g005060.1
GO:0034470	ncRNA processing	1	1/714	83/10829	0.18	0.996599	0.999454	Solyc04g016380.3	Solyc04g016380.3
GO:0006810	transport	4	4/714	174/10829	0.35	0.997403	0.999454	Solyc01g060070.3/Solyc03g112750.4/Solyc03g120260.4/Solyc07g049580.3	Solyc01g060070.3;Solyc03g112750.4;Solyc03g120260.4;Solyc07g049580.3
GO:0034660	ncRNA metabolic process	1	1/714	88/10829	0.17	0.997588	0.999454	Solyc04g016380.3	Solyc04g016380.3
GO:0015979	photosynthesis	2	2/714	121/10829	0.25	0.997606	0.999454	Solyc01g095670.4/Solyc12g094720.3	Solyc01g095670.4;Solyc12g094720.3
GO:0051128	regulation of cellular component organization	2	2/714	122/10829	0.25	0.997748	0.999454	Solyc03g083210.3/Solyc07g049580.3	Solyc03g083210.3;Solyc07g049580.3
GO:0006397	mRNA processing	1	1/714	90/10829	0.17	0.997898	0.999454	Solyc03g112050.4	Solyc03g112050.4
GO:0051276	chromosome organization	1	1/714	90/10829	0.17	0.997898	0.999454	Solyc11g010440.3	Solyc11g010440.3
GO:0016071	mRNA metabolic process	1	1/714	91/10829	0.17	0.998038	0.999454	Solyc02g085650.4	Solyc02g085650.4
GO:0010629	negative regulation of gene expression	1	1/714	104/10829	0.15	0.999198	0.999454	Solyc03g083210.3	Solyc03g083210.3
GO:0006457	protein folding	2	2/714	139/10829	0.22	0.999216	0.999454	Solyc01g103450.3/Solyc05g056390.2	Solyc01g103450.3;Solyc05g056390.2
GO:0010467	gene expression	4	4/714	200/10829	0.3	0.999367	0.999454	Solyc03g113750.3/Solyc04g016380.3/Solyc10g078660.2/Solyc10g083740.3	Solyc03g113750.3;Solyc04g016380.3;Solyc10g078660.2;Solyc10g083740.3
GO:0006412	translation	16	16/714	476/10829	0.51	0.999454	0.999454	Solyc00g500047.1/Solyc01g066840.3/Solyc01g104590.3/Solyc03g025520.4/Solyc05g007560.3/Solyc05g026217.1/Solyc05g051000.3/Solyc06g005110.3/Solyc06g066660.4/Solyc07g025457.1/Solyc08g006900.3/Solyc08g075700.3/Solyc08g083120.3/Solyc09g056130.4/Solyc10g078660.2/Solyc10g083740.3	Solyc00g500047.1;Solyc01g066840.3;Solyc01g104590.3;Solyc03g025520.4;Solyc05g007560.3;Solyc05g026217.1;Solyc05g051000.3;Solyc06g005110.3;Solyc06g066660.4;Solyc07g025457.1;Solyc08g006900.3;Solyc08g075700.3;Solyc08g083120.3;Solyc09g056130.4;Solyc10g078660.2;Solyc10g083740.3

## Sheet: Table S4
Supplementary Table S4. Enriched functional groups in molecular function ontology (MF) in genes with different expression patterns between resistant and susceptible lines
ID	Description	Count	GeneRatio	BgRatio	enrich_factor	pvalue	qvalue	geneID	gene_name
GO:0097027	ubiquitin-protein transferase activator activity	5	5/1315	7/18268	9.92	3.56317e-05	0.0104763	Solyc03g096870.3/Solyc06g043150.4/Solyc06g072830.4/Solyc08g005420.3/Solyc08g080080.4	Solyc03g096870.3;Solyc06g043150.4;Solyc06g072830.4;Solyc08g005420.3;Solyc08g080080.4
GO:0003700	transcription factor activity, sequence-specific DNA binding	81	81/1315	722/18268	1.56	4.21717e-05	0.0104763	Solanum_lycopersicum_newGene_1538/Solyc01g006650.2/Solyc01g006930.3/Solyc01g087050.3/Solyc01g087240.3/Solyc01g090340.3/Solyc01g093965.2/Solyc01g100200.3/Solyc01g110480.4/Solyc02g032950.3/Solyc02g062670.3/Solyc02g071730.4/Solyc02g077250.2/Solyc02g090820.3/Solyc02g092570.1/Solyc02g093050.3/Solyc02g093130.3/Solyc03g026020.3/Solyc03g046440.3/Solyc03g093540.1/Solyc03g093550.1/Solyc03g093560.1/Solyc03g…	--;Solyc01g006650.2;Solyc01g006930.3;Solyc01g087050.3;Solyc01g087240.3;Solyc01g090340.3;Solyc01g093965.2;Solyc01g100200.3;Solyc01g110480.4;Solyc02g032950.3;Solyc02g062670.3;Solyc02g071730.4;Solyc02g077250.2;Solyc02g090820.3;Solyc02g092570.1;Solyc02g093050.3;Solyc02g093130.3;Solyc03g026020.3;Solyc03g046440.3;Solyc03g093540.1;Solyc03g093550.1;Solyc03g093560.1;Solyc03g093610.1;Solyc03g123400.1;Solyc…
GO:0010997	anaphase-promoting complex binding	5	5/1315	8/18268	8.68	8.93585e-05	0.014799	Solyc03g096870.3/Solyc06g043150.4/Solyc06g072830.4/Solyc08g005420.3/Solyc08g080080.4	Solyc03g096870.3;Solyc06g043150.4;Solyc06g072830.4;Solyc08g005420.3;Solyc08g080080.4
GO:0015035	protein disulfide oxidoreductase activity	16	16/1315	80/18268	2.78	0.00015762	0.0195781	Solyc01g008130.4/Solyc01g067440.4/Solyc04g011790.1/Solyc04g011800.1/Solyc04g011810.1/Solyc04g011830.1/Solyc04g011840.1/Solyc04g011850.1/Solyc04g011860.1/Solyc04g011870.1/Solyc04g011880.1/Solyc05g006830.3/Solyc06g054570.1/Solyc06g082180.3/Solyc08g083270.3/Solyc10g008390.3	Solyc01g008130.4;Solyc01g067440.4;Solyc04g011790.1;Solyc04g011800.1;Solyc04g011810.1;Solyc04g011830.1;Solyc04g011840.1;Solyc04g011850.1;Solyc04g011860.1;Solyc04g011870.1;Solyc04g011880.1;Solyc05g006830.3;Solyc06g054570.1;Solyc06g082180.3;Solyc08g083270.3;Solyc10g008390.3
GO:0016747	transferase activity, transferring acyl groups other than amino-acyl groups	24	24/1315	166/18268	2.01	0.000820288	0.0712568	Solyc01g068140.4/Solyc01g107080.3/Solyc01g111070.3/Solyc02g062710.1/Solyc02g063140.4/Solyc02g070790.3/Solyc02g094430.4/Solyc03g005320.3/Solyc03g119980.3/Solyc04g080450.1/Solyc05g009270.4/Solyc05g013220.2/Solyc06g074710.1/Solyc07g008380.2/Solyc07g008390.3/Solyc07g032170.3/Solyc07g052060.2/Solyc08g005760.1/Solyc08g075210.2/Solyc09g091510.3/Solyc11g067270.1/Solyc11g072990.1/Solyc12g005430.1/Solyc12g…	Solyc01g068140.4;Solyc01g107080.3;Solyc01g111070.3;Solyc02g062710.1;Solyc02g063140.4;Solyc02g070790.3;Solyc02g094430.4;Solyc03g005320.3;Solyc03g119980.3;Solyc04g080450.1;Solyc05g009270.4;Solyc05g013220.2;Solyc06g074710.1;Solyc07g008380.2;Solyc07g008390.3;Solyc07g032170.3;Solyc07g052060.2;Solyc08g005760.1;Solyc08g075210.2;Solyc09g091510.3;Solyc11g067270.1;Solyc11g072990.1;Solyc12g005430.1;Solyc12g…
GO:0008194	UDP-glycosyltransferase activity	28	28/1315	206/18268	1.89	0.000860517	0.0712568	Solyc01g095620.3/Solyc01g107780.4/Solyc02g091350.4/Solyc03g114175.1/Solyc03g114710.4/Solyc05g010685.1/Solyc05g053120.1/Solyc05g053400.3/Solyc05g055343.2/Solyc05g055840.4/Solyc06g082300.4/Solyc07g043160.1/Solyc07g043170.4/Solyc08g006330.3/Solyc08g006410.4/Solyc09g059170.3/Solyc09g061860.4/Solyc10g009580.4/Solyc10g085280.1/Solyc10g085860.1/Solyc10g086240.2/Solyc11g066670.1/Solyc12g009920.1/Solyc12g…	Solyc01g095620.3;Solyc01g107780.4;Solyc02g091350.4;Solyc03g114175.1;Solyc03g114710.4;Solyc05g010685.1;Solyc05g053120.1;Solyc05g053400.3;Solyc05g055343.2;Solyc05g055840.4;Solyc06g082300.4;Solyc07g043160.1;Solyc07g043170.4;Solyc08g006330.3;Solyc08g006410.4;Solyc09g059170.3;Solyc09g061860.4;Solyc10g009580.4;Solyc10g085280.1;Solyc10g085860.1;Solyc10g086240.2;Solyc11g066670.1;Solyc12g009920.1;Solyc12g…
GO:0004620	phospholipase activity	3	3/1315	4/18268	10.42	0.00140862	0.0989665	Solyc03g119980.3/Solyc04g079250.3/Solyc07g032170.3	Solyc03g119980.3;Solyc04g079250.3;Solyc07g032170.3
GO:0004672	protein kinase activity	78	78/1315	775/18268	1.4	0.00159353	0.0989665	Solyc01g009300.3/Solyc01g067510.3/Solyc01g098410.4/Solyc01g106055.1/Solyc01g106500.4/Solyc01g107250.3/Solyc01g108000.3/Solyc01g111880.4/Solyc02g023950.3/Solyc02g062790.3/Solyc02g081040.4/Solyc02g081480.4/Solyc02g084370.2/Solyc02g085430.4/Solyc02g086590.3/Solyc02g089920.1/Solyc02g091840.3/Solyc02g093100.3/Solyc02g093420.4/Solyc03g006920.2/Solyc03g043770.4/Solyc03g062660.4/Solyc03g064010.4/Solyc03g…	Solyc01g009300.3;Solyc01g067510.3;Solyc01g098410.4;Solyc01g106055.1;Solyc01g106500.4;Solyc01g107250.3;Solyc01g108000.3;Solyc01g111880.4;Solyc02g023950.3;Solyc02g062790.3;Solyc02g081040.4;Solyc02g081480.4;Solyc02g084370.2;Solyc02g085430.4;Solyc02g086590.3;Solyc02g089920.1;Solyc02g091840.3;Solyc02g093100.3;Solyc02g093420.4;Solyc03g006920.2;Solyc03g043770.4;Solyc03g062660.4;Solyc03g064010.4;Solyc03g…
GO:0043565	sequence-specific DNA binding	43	43/1315	384/18268	1.56	0.00261133	0.144158	Solanum_lycopersicum_newGene_1538/Solyc01g073910.4/Solyc01g090460.3/Solyc01g100200.3/Solyc01g100220.3/Solyc02g032950.3/Solyc02g077250.2/Solyc02g090820.3/Solyc02g092570.1/Solyc02g093050.3/Solyc03g026020.3/Solyc03g033660.4/Solyc03g123400.1/Solyc04g015360.3/Solyc04g051690.4/Solyc04g072900.1/Solyc04g078550.3/Solyc05g007180.3/Solyc05g009170.3/Solyc05g056120.3/Solyc06g053610.3/Solyc06g066370.4/Solyc06g…	--;Solyc01g073910.4;Solyc01g090460.3;Solyc01g100200.3;Solyc01g100220.3;Solyc02g032950.3;Solyc02g077250.2;Solyc02g090820.3;Solyc02g092570.1;Solyc02g093050.3;Solyc03g026020.3;Solyc03g033660.4;Solyc03g123400.1;Solyc04g015360.3;Solyc04g051690.4;Solyc04g072900.1;Solyc04g078550.3;Solyc05g007180.3;Solyc05g009170.3;Solyc05g056120.3;Solyc06g053610.3;Solyc06g066370.4;Solyc06g068460.3;Solyc07g043330.3;Solyc…
GO:0015098	molybdate ion transmembrane transporter activity	3	3/1315	5/18268	8.34	0.00333254	0.165575	Solyc03g119930.1/Solyc08g066750.3/Solyc10g084680.1	Solyc03g119930.1;Solyc08g066750.3;Solyc10g084680.1
GO:0003883	CTP synthase activity	3	3/1315	6/18268	6.95	0.00630872	0.261203	Solyc01g056850.3/Solyc01g098530.3/Solyc02g082190.3	Solyc01g056850.3;Solyc01g098530.3;Solyc02g082190.3
GO:0046577	long-chain-alcohol oxidase activity	3	3/1315	6/18268	6.95	0.00630872	0.261203	Solyc08g005630.3/Solyc08g075240.3/Solyc09g072610.3	Solyc08g005630.3;Solyc08g075240.3;Solyc09g072610.3
GO:0046982	protein heterodimerization activity	21	21/1315	166/18268	1.76	0.0082331	0.292762	Solyc01g080600.4/Solyc01g099410.3/Solyc02g038690.1/Solyc03g071620.2/Solyc04g011390.1/Solyc04g074150.3/Solyc04g074580.1/Solyc06g005390.1/Solyc06g005420.1/Solyc06g005430.1/Solyc06g074750.1/Solyc06g075800.1/Solyc06g075850.1/Solyc06g075930.1/Solyc06g075960.1/Solyc06g084090.4/Solyc06g084430.4/Solyc07g065500.2/Solyc08g081840.3/Solyc10g008910.1/Solyc11g072860.2	Solyc01g080600.4;Solyc01g099410.3;Solyc02g038690.1;Solyc03g071620.2;Solyc04g011390.1;Solyc04g074150.3;Solyc04g074580.1;Solyc06g005390.1;Solyc06g005420.1;Solyc06g005430.1;Solyc06g074750.1;Solyc06g075800.1;Solyc06g075850.1;Solyc06g075930.1;Solyc06g075960.1;Solyc06g084090.4;Solyc06g084430.4;Solyc07g065500.2;Solyc08g081840.3;Solyc10g008910.1;Solyc11g072860.2
GO:0005504	fatty acid binding	4	4/1315	12/18268	4.63	0.00828188	0.292762	Solyc01g066910.3/Solyc03g121900.1/Solyc07g065110.1/Solyc08g078390.4	Solyc01g066910.3;Solyc03g121900.1;Solyc07g065110.1;Solyc08g078390.4
GO:0004857	enzyme inhibitor activity	15	15/1315	106/18268	1.97	0.00883868	0.292762	Solyc01g098930.3/Solyc02g080220.3/Solyc03g083720.1/Solyc03g095780.3/Solyc03g112960.1/Solyc03g112970.1/Solyc06g034360.2/Solyc06g034370.1/Solyc07g065090.2/Solyc08g006690.1/Solyc09g011030.3/Solyc09g014480.3/Solyc10g076410.1/Solyc11g019910.1/Solyc12g099200.2	Solyc01g098930.3;Solyc02g080220.3;Solyc03g083720.1;Solyc03g095780.3;Solyc03g112960.1;Solyc03g112970.1;Solyc06g034360.2;Solyc06g034370.1;Solyc07g065090.2;Solyc08g006690.1;Solyc09g011030.3;Solyc09g014480.3;Solyc10g076410.1;Solyc11g019910.1;Solyc12g099200.2
GO:0004861	cyclin-dependent protein serine/threonine kinase inhibitor activity	3	3/1315	7/18268	5.95	0.0104523	0.32457	Solyc01g108610.3/Solyc02g090680.3/Solyc09g061280.4	Solyc01g108610.3;Solyc02g090680.3;Solyc09g061280.4
GO:0003688	DNA replication origin binding	2	2/1315	3/18268	9.26	0.0147896	0.336948	Solyc02g093300.3/Solyc07g005020.3	Solyc02g093300.3;Solyc07g005020.3
GO:0004020	adenylylsulfate kinase activity	2	2/1315	3/18268	9.26	0.0147896	0.336948	Solyc02g064650.3/Solyc10g080680.3	Solyc02g064650.3;Solyc10g080680.3
GO:0004376	glycolipid mannosyltransferase activity	2	2/1315	3/18268	9.26	0.0147896	0.336948	Solyc01g006000.3/Solyc02g083260.3	Solyc01g006000.3;Solyc02g083260.3
GO:0019205	nucleobase-containing compound kinase activity	2	2/1315	3/18268	9.26	0.0147896	0.336948	Solyc02g093990.4/Solyc03g005050.3	Solyc02g093990.4;Solyc03g005050.3
GO:0090353	polygalacturonase inhibitor activity	2	2/1315	3/18268	9.26	0.0147896	0.336948	Solyc07g065090.2/Solyc09g014480.3	Solyc07g065090.2;Solyc09g014480.3
GO:0016717	oxidoreductase activity, acting on paired donors, with oxidation of a pair of donors resulting in the reduction of molecular oxygen to two molecules of water	4	4/1315	14/18268	3.97	0.01492	0.336948	Solyc04g040120.1/Solyc04g040130.1/Solyc12g045035.1/Solyc12g045037.1	Solyc04g040120.1;Solyc04g040130.1;Solyc12g045035.1;Solyc12g045037.1
GO:0004805	trehalose-phosphatase activity	3	3/1315	8/18268	5.21	0.0158364	0.342096	Solyc04g054930.3/Solyc04g072920.4/Solyc08g079060.4	Solyc04g054930.3;Solyc04g072920.4;Solyc08g079060.4
GO:0004553	hydrolase activity, hydrolyzing O-glycosyl compounds	24	24/1315	213/18268	1.57	0.0193674	0.400939	Solyc01g008620.4/Solyc01g081060.4/Solyc01g095670.4/Solyc02g080310.2/Solyc02g086700.4/Solyc03g031800.3/Solyc03g094020.3/Solyc03g098430.4/Solyc04g008210.2/Solyc04g015190.3/Solyc04g072850.4/Solyc05g013810.4/Solyc06g076170.4/Solyc07g005090.4/Solyc08g005000.4/Solyc08g083310.3/Solyc09g075070.3/Solyc11g072830.1/Solyc12g008580.2/Solyc12g013750.2/Solyc12g014420.2/Solyc12g017240.2/Solyc12g019890.2/Solyc12g…	Solyc01g008620.4;Solyc01g081060.4;Solyc01g095670.4;Solyc02g080310.2;Solyc02g086700.4;Solyc03g031800.3;Solyc03g094020.3;Solyc03g098430.4;Solyc04g008210.2;Solyc04g015190.3;Solyc04g072850.4;Solyc05g013810.4;Solyc06g076170.4;Solyc07g005090.4;Solyc08g005000.4;Solyc08g083310.3;Solyc09g075070.3;Solyc11g072830.1;Solyc12g008580.2;Solyc12g013750.2;Solyc12g014420.2;Solyc12g017240.2;Solyc12g019890.2;Solyc12g…
GO:0008810	cellulase activity	5	5/1315	23/18268	3.02	0.0216902	0.406416	Solyc04g081300.4/Solyc05g005080.3/Solyc07g049300.3/Solyc08g081620.4/Solyc09g075360.4	Solyc04g081300.4;Solyc05g005080.3;Solyc07g049300.3;Solyc08g081620.4;Solyc09g075360.4
GO:0052692	raffinose alpha-galactosidase activity	2	2/1315	4/18268	6.95	0.0281706	0.406416	Solyc03g019790.3/Solyc06g050130.3	Solyc03g019790.3;Solyc06g050130.3
GO:0019840	isoprenoid binding	3	3/1315	11/18268	3.79	0.0396757	0.406416	Solyc03g095780.3/Solyc08g082180.3/Solyc10g076410.1	Solyc03g095780.3;Solyc08g082180.3;Solyc10g076410.1
GO:0009055	electron carrier activity	19	19/1315	173/18268	1.53	0.0431654	0.406416	Solyc01g008130.4/Solyc01g067440.4/Solyc03g116690.3/Solyc04g011790.1/Solyc04g011800.1/Solyc04g011810.1/Solyc04g011830.1/Solyc04g011840.1/Solyc04g011850.1/Solyc04g011860.1/Solyc04g011870.1/Solyc04g011880.1/Solyc06g054570.1/Solyc06g082180.3/Solyc08g006790.4/Solyc08g083270.3/Solyc11g006910.3/Solyc11g042420.2/Solyc11g062350.2	Solyc01g008130.4;Solyc01g067440.4;Solyc03g116690.3;Solyc04g011790.1;Solyc04g011800.1;Solyc04g011810.1;Solyc04g011830.1;Solyc04g011840.1;Solyc04g011850.1;Solyc04g011860.1;Solyc04g011870.1;Solyc04g011880.1;Solyc06g054570.1;Solyc06g082180.3;Solyc08g006790.4;Solyc08g083270.3;Solyc11g006910.3;Solyc11g042420.2;Solyc11g062350.2
GO:0003951	NAD+ kinase activity	4	4/1315	19/18268	2.92	0.0434061	0.406416	Solyc01g008560.3/Solyc01g095010.4/Solyc03g006630.3/Solyc10g008640.3	Solyc01g008560.3;Solyc01g095010.4;Solyc03g006630.3;Solyc10g008640.3
GO:0003979	UDP-glucose 6-dehydrogenase activity	2	2/1315	5/18268	5.56	0.0447293	0.406416	Solyc02g088690.4/Solyc06g069550.1	Solyc02g088690.4;Solyc06g069550.1
GO:0004478	methionine adenosyltransferase activity	2	2/1315	5/18268	5.56	0.0447293	0.406416	Solyc01g101060.4/Solyc12g099000.3	Solyc01g101060.4;Solyc12g099000.3
GO:0004616	phosphogluconate dehydrogenase (decarboxylating) activity	2	2/1315	5/18268	5.56	0.0447293	0.406416	Solyc05g010260.4/Solyc12g056120.1	Solyc05g010260.4;Solyc12g056120.1
GO:0019210	kinase inhibitor activity	2	2/1315	5/18268	5.56	0.0447293	0.406416	Solyc05g054850.1/Solyc09g075750.1	Solyc05g054850.1;Solyc09g075750.1
GO:0070300	phosphatidic acid binding	2	2/1315	5/18268	5.56	0.0447293	0.406416	Solyc02g079780.1/Solyc12g035420.3	Solyc02g079780.1;Solyc12g035420.3
GO:0015211	purine nucleoside transmembrane transporter activity	5	5/1315	28/18268	2.48	0.0471457	0.406416	Solyc02g071080.3/Solyc02g071090.3/Solyc02g071110.3/Solyc08g077380.4/Solyc12g057100.2	Solyc02g071080.3;Solyc02g071090.3;Solyc02g071110.3;Solyc08g077380.4;Solyc12g057100.2
GO:0033293	monocarboxylic acid binding	3	3/1315	12/18268	3.47	0.0501403	0.406416	Solyc03g095780.3/Solyc08g082180.3/Solyc10g076410.1	Solyc03g095780.3;Solyc08g082180.3;Solyc10g076410.1
GO:0016762	xyloglucan:xyloglucosyl transferase activity	6	6/1315	40/18268	2.08	0.0646735	0.406416	Solyc01g081060.4/Solyc03g031800.3/Solyc03g098430.4/Solyc04g008210.2/Solyc12g017240.2/Solyc12g098603.1	Solyc01g081060.4;Solyc03g031800.3;Solyc03g098430.4;Solyc04g008210.2;Solyc12g017240.2;Solyc12g098603.1
GO:0004252	serine-type endopeptidase activity	17	17/1315	160/18268	1.48	0.0687471	0.406416	Solyc01g111400.4/Solyc02g071580.4/Solyc03g044150.4/Solyc03g118850.4/Solyc04g078710.3/Solyc04g081810.4/Solyc04g082120.3/Solyc06g084480.3/Solyc07g008900.4/Solyc08g077440.3/Solyc08g079840.2/Solyc08g079860.2/Solyc08g079880.2/Solyc08g079890.2/Solyc08g079900.3/Solyc10g086600.3/Solyc12g088760.1	Solyc01g111400.4;Solyc02g071580.4;Solyc03g044150.4;Solyc03g118850.4;Solyc04g078710.3;Solyc04g081810.4;Solyc04g082120.3;Solyc06g084480.3;Solyc07g008900.4;Solyc08g077440.3;Solyc08g079840.2;Solyc08g079860.2;Solyc08g079880.2;Solyc08g079890.2;Solyc08g079900.3;Solyc10g086600.3;Solyc12g088760.1
GO:0010427	abscisic acid binding	4	4/1315	22/18268	2.53	0.0691538	0.406416	Solyc03g095780.3/Solyc06g050500.2/Solyc08g082180.3/Solyc10g076410.1	Solyc03g095780.3;Solyc06g050500.2;Solyc08g082180.3;Solyc10g076410.1
GO:0000009	alpha-1,6-mannosyltransferase activity	1	1/1315	1/18268	13.89	0.0719838	0.406416	Solyc01g006000.3	Solyc01g006000.3
GO:0001216	bacterial-type RNA polymerase transcriptional activator activity, sequence-specific DNA binding	1	1/1315	1/18268	13.89	0.0719838	0.406416	Solyc12g006700.3	Solyc12g006700.3
GO:0002058	uracil binding	1	1/1315	1/18268	13.89	0.0719838	0.406416	Solyc03g097910.4	Solyc03g097910.4
GO:0003846	2-acylglycerol O-acyltransferase activity	1	1/1315	1/18268	13.89	0.0719838	0.406416	Solyc03g119980.3	Solyc03g119980.3
GO:0003886	DNA (cytosine-5-)-methyltransferase activity	1	1/1315	1/18268	13.89	0.0719838	0.406416	Solyc11g030600.3	Solyc11g030600.3
GO:0003922	GMP synthase (glutamine-hydrolyzing) activity	1	1/1315	1/18268	13.89	0.0719838	0.406416	Solyc08g081150.4	Solyc08g081150.4
GO:0004161	dimethylallyltranstransferase activity	1	1/1315	1/18268	13.89	0.0719838	0.406416	Solyc12g015860.2	Solyc12g015860.2
GO:0004337	geranyltranstransferase activity	1	1/1315	1/18268	13.89	0.0719838	0.406416	Solyc12g015860.2	Solyc12g015860.2
GO:0004491	methylmalonate-semialdehyde dehydrogenase (acylating) activity	1	1/1315	1/18268	13.89	0.0719838	0.406416	Solyc01g106080.4	Solyc01g106080.4
GO:0004496	mevalonate kinase activity	1	1/1315	1/18268	13.89	0.0719838	0.406416	Solyc01g098840.3	Solyc01g098840.3
GO:0004582	dolichyl-phosphate beta-D-mannosyltransferase activity	1	1/1315	1/18268	13.89	0.0719838	0.406416	Solyc04g082390.3	Solyc04g082390.3
GO:0004622	lysophospholipase activity	1	1/1315	1/18268	13.89	0.0719838	0.406416	Solyc03g119980.3	Solyc03g119980.3
GO:0004638	phosphoribosylaminoimidazole carboxylase activity	1	1/1315	1/18268	13.89	0.0719838	0.406416	Solyc11g006340.2	Solyc11g006340.2
GO:0004745	retinol dehydrogenase activity	1	1/1315	1/18268	13.89	0.0719838	0.406416	Solyc03g098460.3	Solyc03g098460.3
GO:0004750	ribulose-phosphate 3-epimerase activity	1	1/1315	1/18268	13.89	0.0719838	0.406416	Solyc05g007260.3	Solyc05g007260.3
GO:0004766	spermidine synthase activity	1	1/1315	1/18268	13.89	0.0719838	0.406416	Solyc03g007240.3	Solyc03g007240.3
GO:0004844	uracil DNA N-glycosylase activity	1	1/1315	1/18268	13.89	0.0719838	0.406416	Solyc02g021060.4	Solyc02g021060.4
GO:0005342	organic acid transmembrane transporter activity	1	1/1315	1/18268	13.89	0.0719838	0.406416	Solyc01g060070.3	Solyc01g060070.3
GO:0008265	Mo-molybdopterin cofactor sulfurase activity	1	1/1315	1/18268	13.89	0.0719838	0.406416	Solyc07g066480.3	Solyc07g066480.3
GO:0008509	anion transmembrane transporter activity	1	1/1315	1/18268	13.89	0.0719838	0.406416	Solyc01g060070.3	Solyc01g060070.3
GO:0008514	organic anion transmembrane transporter activity	1	1/1315	1/18268	13.89	0.0719838	0.406416	Solyc01g060070.3	Solyc01g060070.3
GO:0008760	UDP-N-acetylglucosamine 1-carboxyvinyltransferase activity	1	1/1315	1/18268	13.89	0.0719838	0.406416	Solyc07g062543.1	Solyc07g062543.1
GO:0010283	pinoresinol reductase activity	1	1/1315	1/18268	13.89	0.0719838	0.406416	Solyc03g044720.2	Solyc03g044720.2
GO:0010491	UTP:arabinose-1-phosphate uridylyltransferase activity	1	1/1315	1/18268	13.89	0.0719838	0.406416	Solyc04g058070.3	Solyc04g058070.3
GO:0016411	acylglycerol O-acyltransferase activity	1	1/1315	1/18268	13.89	0.0719838	0.406416	Solyc03g119980.3	Solyc03g119980.3
GO:0016768	spermine synthase activity	1	1/1315	1/18268	13.89	0.0719838	0.406416	Solyc03g007240.3	Solyc03g007240.3
GO:0017103	UTP:galactose-1-phosphate uridylyltransferase activity	1	1/1315	1/18268	13.89	0.0719838	0.406416	Solyc04g058070.3	Solyc04g058070.3
GO:0017113	dihydropyrimidine dehydrogenase (NADP+) activity	1	1/1315	1/18268	13.89	0.0719838	0.406416	Solyc03g097910.4	Solyc03g097910.4
GO:0017116	single-stranded DNA-dependent ATP-dependent DNA helicase activity	1	1/1315	1/18268	13.89	0.0719838	0.406416	Solyc01g088380.3	Solyc01g088380.3
GO:0019003	GDP binding	1	1/1315	1/18268	13.89	0.0719838	0.406416	Solyc12g035420.3	Solyc12g035420.3
GO:0019103	pyrimidine nucleotide binding	1	1/1315	1/18268	13.89	0.0719838	0.406416	Solyc02g093300.3	Solyc02g093300.3
GO:0019140	inositol 3-kinase activity	1	1/1315	1/18268	13.89	0.0719838	0.406416	Solyc06g076950.3	Solyc06g076950.3
GO:0030144	alpha-1,6-mannosylglycoprotein 6-beta-N-acetylglucosaminyltransferase activity	1	1/1315	1/18268	13.89	0.0719838	0.406416	Solyc06g054450.3	Solyc06g054450.3
GO:0036033	mediator complex binding	1	1/1315	1/18268	13.89	0.0719838	0.406416	Solyc01g108910.4	Solyc01g108910.4
GO:0042030	ATPase inhibitor activity	1	1/1315	1/18268	13.89	0.0719838	0.406416	Solyc05g055250.2	Solyc05g055250.2
GO:0042283	dolichyl pyrophosphate Glc1Man9GlcNAc2 alpha-1,3-glucosyltransferase activity	1	1/1315	1/18268	13.89	0.0719838	0.406416	Solyc01g088650.4	Solyc01g088650.4
GO:0043715	2,3-diketo-5-methylthiopentyl-1-phosphate enolase activity	1	1/1315	1/18268	13.89	0.0719838	0.406416	Solyc07g063040.3	Solyc07g063040.3
GO:0043716	2-hydroxy-3-keto-5-methylthiopentenyl-1-phosphate phosphatase activity	1	1/1315	1/18268	13.89	0.0719838	0.406416	Solyc07g063040.3	Solyc07g063040.3
GO:0046423	allene-oxide cyclase activity	1	1/1315	1/18268	13.89	0.0719838	0.406416	Solyc02g085730.3	Solyc02g085730.3
GO:0046570	methylthioribulose 1-phosphate dehydratase activity	1	1/1315	1/18268	13.89	0.0719838	0.406416	Solyc07g063040.3	Solyc07g063040.3
GO:0046943	carboxylic acid transmembrane transporter activity	1	1/1315	1/18268	13.89	0.0719838	0.406416	Solyc01g060070.3	Solyc01g060070.3
GO:0047338	UTP:xylose-1-phosphate uridylyltransferase activity	1	1/1315	1/18268	13.89	0.0719838	0.406416	Solyc04g058070.3	Solyc04g058070.3
GO:0047350	glucuronate-1-phosphate uridylyltransferase activity	1	1/1315	1/18268	13.89	0.0719838	0.406416	Solyc04g058070.3	Solyc04g058070.3
GO:0050515	4-(cytidine 5'-diphospho)-2-C-methyl-D-erythritol kinase activity	1	1/1315	1/18268	13.89	0.0719838	0.406416	Solyc01g009010.3	Solyc01g009010.3
GO:0050619	phytochromobilin:ferredoxin oxidoreductase activity	1	1/1315	1/18268	13.89	0.0719838	0.406416	Solyc01g008930.4	Solyc01g008930.4
GO:0051751	alpha-1,4-mannosyltransferase activity	1	1/1315	1/18268	13.89	0.0719838	0.406416	Solyc02g083260.3	Solyc02g083260.3
GO:0052650	NADP-retinol dehydrogenase activity	1	1/1315	1/18268	13.89	0.0719838	0.406416	Solyc03g098460.3	Solyc03g098460.3
GO:0090430	caffeoyl-CoA: alcohol caffeoyl transferase activity	1	1/1315	1/18268	13.89	0.0719838	0.406416	Solyc03g119980.3	Solyc03g119980.3
GO:0102867	molybdenum cofactor sulfurtransferase activity	1	1/1315	1/18268	13.89	0.0719838	0.406416	Solyc07g066480.3	Solyc07g066480.3
GO:0004427	inorganic diphosphatase activity	3	3/1315	14/18268	2.98	0.0745795	0.411714	Solyc04g071880.3/Solyc09g010380.3/Solyc12g009840.2	Solyc04g071880.3;Solyc09g010380.3;Solyc12g009840.2
GO:0033612	receptor serine/threonine kinase binding	3	3/1315	14/18268	2.98	0.0745795	0.411714	Solyc01g107250.3/Solyc03g043770.4/Solyc08g042100.3	Solyc01g107250.3;Solyc03g043770.4;Solyc08g042100.3
GO:0003678	DNA helicase activity	6	6/1315	42/18268	1.98	0.078434	0.428234	Solyc01g079500.4/Solyc01g110130.3/Solyc02g070780.4/Solyc02g082180.3/Solyc07g005020.3/Solyc11g040120.3	Solyc01g079500.4;Solyc01g110130.3;Solyc02g070780.4;Solyc02g082180.3;Solyc07g005020.3;Solyc11g040120.3
GO:0009678	hydrogen-translocating pyrophosphatase activity	2	2/1315	7/18268	3.97	0.0853346	0.460846	Solyc04g071880.3/Solyc12g009840.2	Solyc04g071880.3;Solyc12g009840.2
GO:0008236	serine-type peptidase activity	4	4/1315	25/18268	2.22	0.101125	0.493395	Solyc02g070870.4/Solyc02g071190.4/Solyc08g068400.4/Solyc12g007110.2	Solyc02g070870.4;Solyc02g071190.4;Solyc08g068400.4;Solyc12g007110.2
GO:0030570	pectate lyase activity	4	4/1315	25/18268	2.22	0.101125	0.493395	Solyc02g087670.3/Solyc03g058890.4/Solyc03g058910.3/Solyc09g008380.3	Solyc02g087670.3;Solyc03g058890.4;Solyc03g058910.3;Solyc09g008380.3
GO:0015276	ligand-gated ion channel activity	3	3/1315	16/18268	2.6	0.103247	0.493395	Solyc04g078860.4/Solyc06g063170.3/Solyc06g063210.3	Solyc04g078860.4;Solyc06g063170.3;Solyc06g063210.3
GO:0016831	carboxy-lyase activity	5	5/1315	35/18268	1.98	0.10362	0.493395	Solyc08g006740.3/Solyc08g006750.4/Solyc08g068600.3/Solyc08g068610.3/Solyc08g068680.4	Solyc08g006740.3;Solyc08g006750.4;Solyc08g068600.3;Solyc08g068610.3;Solyc08g068680.4
GO:0047325	inositol tetrakisphosphate 1-kinase activity	2	2/1315	8/18268	3.47	0.108501	0.493395	Solyc08g005130.1/Solyc08g015630.3	Solyc08g005130.1;Solyc08g015630.3
GO:0052725	inositol-1,3,4-trisphosphate 6-kinase activity	2	2/1315	8/18268	3.47	0.108501	0.493395	Solyc08g005130.1/Solyc08g015630.3	Solyc08g005130.1;Solyc08g015630.3
GO:0052726	inositol-1,3,4-trisphosphate 5-kinase activity	2	2/1315	8/18268	3.47	0.108501	0.493395	Solyc08g005130.1/Solyc08g015630.3	Solyc08g005130.1;Solyc08g015630.3
GO:0016788	hydrolase activity, acting on ester bonds	39	39/1315	443/18268	1.22	0.111332	0.493395	Solyc01g005400.3/Solyc01g007267.1/Solyc01g088490.3/Solyc01g100930.3/Solyc02g069500.1/Solyc02g071610.3/Solyc02g071710.3/Solyc02g072010.3/Solyc02g085650.4/Solyc02g094040.3/Solyc03g006250.2/Solyc03g019670.3/Solyc03g113750.3/Solyc03g116540.1/Solyc03g119980.3/Solyc03g121170.3/Solyc04g010050.4/Solyc04g010060.2/Solyc04g050730.3/Solyc04g064660.1/Solyc04g079150.1/Solyc04g081770.4/Solyc05g006460.3/Solyc05g…	Solyc01g005400.3;Solyc01g007267.1;Solyc01g088490.3;Solyc01g100930.3;Solyc02g069500.1;Solyc02g071610.3;Solyc02g071710.3;Solyc02g072010.3;Solyc02g085650.4;Solyc02g094040.3;Solyc03g006250.2;Solyc03g019670.3;Solyc03g113750.3;Solyc03g116540.1;Solyc03g119980.3;Solyc03g121170.3;Solyc04g010050.4;Solyc04g010060.2;Solyc04g050730.3;Solyc04g064660.1;Solyc04g079150.1;Solyc04g081770.4;Solyc05g006460.3;Solyc05g…
GO:0003774	motor activity	4	4/1315	26/18268	2.14	0.113057	0.493395	Solyc03g007480.3/Solyc06g008090.3/Solyc07g063610.4/Solyc12g044240.3	Solyc03g007480.3;Solyc06g008090.3;Solyc07g063610.4;Solyc12g044240.3
GO:0031406	carboxylic acid binding	3	3/1315	17/18268	2.45	0.118971	0.493395	Solyc03g095780.3/Solyc08g082180.3/Solyc10g076410.1	Solyc03g095780.3;Solyc08g082180.3;Solyc10g076410.1
GO:0043177	organic acid binding	3	3/1315	17/18268	2.45	0.118971	0.493395	Solyc03g095780.3/Solyc08g082180.3/Solyc10g076410.1	Solyc03g095780.3;Solyc08g082180.3;Solyc10g076410.1
GO:0004568	chitinase activity	4	4/1315	27/18268	2.06	0.125576	0.493395	Solyc01g095670.4/Solyc02g061770.4/Solyc06g053380.3/Solyc12g098810.2	Solyc01g095670.4;Solyc02g061770.4;Solyc06g053380.3;Solyc12g098810.2
GO:0016628	oxidoreductase activity, acting on the CH-CH group of donors, NAD or NADP as acceptor	2	2/1315	9/18268	3.09	0.133072	0.493395	Solyc01g009310.3/Solyc03g044720.2	Solyc01g009310.3;Solyc03g044720.2
GO:0004867	serine-type endopeptidase inhibitor activity	5	5/1315	38/18268	1.83	0.134867	0.493395	Solanum_lycopersicum_newGene_1975/Solyc06g069400.4/Solyc09g089500.3/Solyc09g089520.4/Solyc11g020960.2	--;Solyc06g069400.4;Solyc09g089500.3;Solyc09g089520.4;Solyc11g020960.2
GO:0008168	methyltransferase activity	14	14/1315	141/18268	1.38	0.137643	0.493395	Solyc01g014320.4/Solyc01g088000.4/Solyc01g091640.3/Solyc02g084950.3/Solyc04g005430.4/Solyc04g040180.3/Solyc04g055253.1/Solyc04g055255.1/Solyc04g055257.1/Solyc04g080360.4/Solyc05g012450.4/Solyc05g049980.3/Solyc07g063460.3/Solyc12g017630.2	Solyc01g014320.4;Solyc01g088000.4;Solyc01g091640.3;Solyc02g084950.3;Solyc04g005430.4;Solyc04g040180.3;Solyc04g055253.1;Solyc04g055255.1;Solyc04g055257.1;Solyc04g080360.4;Solyc05g012450.4;Solyc05g049980.3;Solyc07g063460.3;Solyc12g017630.2
GO:0004650	polygalacturonase activity	7	7/1315	60/18268	1.62	0.138462	0.493395	Solyc03g007940.4/Solyc03g116590.3/Solyc03g117750.3/Solyc05g005170.4/Solyc05g049980.3/Solyc08g060970.4/Solyc08g081480.3	Solyc03g007940.4;Solyc03g116590.3;Solyc03g117750.3;Solyc05g005170.4;Solyc05g049980.3;Solyc08g060970.4;Solyc08g081480.3
GO:0051087	chaperone binding	4	4/1315	28/18268	1.98	0.138648	0.493395	Solyc06g035720.3/Solyc06g072430.3/Solyc08g080320.3/Solyc10g084170.1	Solyc06g035720.3;Solyc06g072430.3;Solyc08g080320.3;Solyc10g084170.1
GO:0003876	AMP deaminase activity	1	1/1315	2/18268	6.95	0.13879	0.493395	Solyc05g006910.4	Solyc05g006910.4
GO:0003896	DNA primase activity	1	1/1315	2/18268	6.95	0.13879	0.493395	Solyc08g082200.3	Solyc08g082200.3
GO:0004033	aldo-keto reductase (NADP) activity	1	1/1315	2/18268	6.95	0.13879	0.493395	Solyc03g098460.3	Solyc03g098460.3
GO:0004128	cytochrome-b5 reductase activity, acting on NAD(P)H	1	1/1315	2/18268	6.95	0.13879	0.493395	Solyc10g081440.2	Solyc10g081440.2
GO:0004148	dihydrolipoyl dehydrogenase activity	1	1/1315	2/18268	6.95	0.13879	0.493395	Solyc05g053300.3	Solyc05g053300.3
GO:0004439	phosphatidylinositol-4,5-bisphosphate 5-phosphatase activity	1	1/1315	2/18268	6.95	0.13879	0.493395	Solyc08g077210.4	Solyc08g077210.4
GO:0004452	isopentenyl-diphosphate delta-isomerase activity	1	1/1315	2/18268	6.95	0.13879	0.493395	Solyc05g055760.3	Solyc05g055760.3
GO:0004567	beta-mannosidase activity	1	1/1315	2/18268	6.95	0.13879	0.493395	Solyc12g013750.2	Solyc12g013750.2
GO:0004576	oligosaccharyl transferase activity	1	1/1315	2/18268	6.95	0.13879	0.493395	Solyc12g008360.2	Solyc12g008360.2
GO:0004579	dolichyl-diphosphooligosaccharide-protein glycotransferase activity	1	1/1315	2/18268	6.95	0.13879	0.493395	Solyc04g082670.4	Solyc04g082670.4
GO:0004657	proline dehydrogenase activity	1	1/1315	2/18268	6.95	0.13879	0.493395	Solyc02g089620.3	Solyc02g089620.3
GO:0004788	thiamine diphosphokinase activity	1	1/1315	2/18268	6.95	0.13879	0.493395	Solyc09g074970.3	Solyc09g074970.3
GO:0008446	GDP-mannose 4,6-dehydratase activity	1	1/1315	2/18268	6.95	0.13879	0.493395	Solyc03g118270.1	Solyc03g118270.1
GO:0008762	UDP-N-acetylmuramate dehydrogenase activity	1	1/1315	2/18268	6.95	0.13879	0.493395	Solyc02g063180.4	Solyc02g063180.4
GO:0008840	4-hydroxy-tetrahydrodipicolinate synthase	1	1/1315	2/18268	6.95	0.13879	0.493395	Solyc03g044660.3	Solyc03g044660.3
GO:0015377	cation:chloride symporter activity	1	1/1315	2/18268	6.95	0.13879	0.493395	Solyc02g021620.3	Solyc02g021620.3
GO:0015923	mannosidase activity	1	1/1315	2/18268	6.95	0.13879	0.493395	Solyc12g013750.2	Solyc12g013750.2
GO:0016531	copper chaperone activity	1	1/1315	2/18268	6.95	0.13879	0.493395	Solyc07g063160.2	Solyc07g063160.2
GO:0016920	pyroglutamyl-peptidase activity	1	1/1315	2/18268	6.95	0.13879	0.493395	Solyc05g005200.3	Solyc05g005200.3
GO:0017075	syntaxin-1 binding	1	1/1315	2/18268	6.95	0.13879	0.493395	Solyc02g082690.3	Solyc02g082690.3
GO:0030975	thiamine binding	1	1/1315	2/18268	6.95	0.13879	0.493395	Solyc09g074970.3	Solyc09g074970.3
GO:0031071	cysteine desulfurase activity	1	1/1315	2/18268	6.95	0.13879	0.493395	Solyc02g091900.4	Solyc02g091900.4
GO:0034485	phosphatidylinositol-3,4,5-trisphosphate 5-phosphatase activity	1	1/1315	2/18268	6.95	0.13879	0.493395	Solyc08g077210.4	Solyc08g077210.4
GO:0042171	lysophosphatidic acid acyltransferase activity	1	1/1315	2/18268	6.95	0.13879	0.493395	Solyc07g032170.3	Solyc07g032170.3
GO:0042281	dolichyl pyrophosphate Man9GlcNAc2 alpha-1,3-glucosyltransferase activity	1	1/1315	2/18268	6.95	0.13879	0.493395	Solyc02g085850.1	Solyc02g085850.1
GO:0043874	acireductone synthase activity	1	1/1315	2/18268	6.95	0.13879	0.493395	Solyc07g063040.3	Solyc07g063040.3
GO:0047372	acylglycerol lipase activity	1	1/1315	2/18268	6.95	0.13879	0.493395	Solyc04g079250.3	Solyc04g079250.3
GO:0047429	nucleoside-triphosphate diphosphatase activity	1	1/1315	2/18268	6.95	0.13879	0.493395	Solyc02g085290.3	Solyc02g085290.3
GO:0051787	misfolded protein binding	1	1/1315	2/18268	6.95	0.13879	0.493395	Solyc05g007895.1	Solyc05g007895.1
GO:0080013	(E,E)-geranyllinalool synthase activity	1	1/1315	2/18268	6.95	0.13879	0.493395	Solyc03g006550.4	Solyc03g006550.4
GO:0003677	DNA binding	121	121/1315	1528/18268	1.1	0.139029	0.493395	Solanum_lycopersicum_newGene_2315/Solanum_lycopersicum_newGene_3566/Solyc01g014180.3/Solyc01g066730.4/Solyc01g079500.4/Solyc01g080600.4/Solyc01g086960.3/Solyc01g087240.3/Solyc01g088380.3/Solyc01g090340.3/Solyc01g099410.3/Solyc01g104740.3/Solyc01g106940.4/Solyc01g107410.3/Solyc01g110130.3/Solyc01g111500.3/Solyc02g036430.2/Solyc02g038690.1/Solyc02g070780.4/Solyc02g082180.3/Solyc02g082700.3/Solyc02g…	--;--;Solyc01g014180.3;Solyc01g066730.4;Solyc01g079500.4;Solyc01g080600.4;Solyc01g086960.3;Solyc01g087240.3;Solyc01g088380.3;Solyc01g090340.3;Solyc01g099410.3;Solyc01g104740.3;Solyc01g106940.4;Solyc01g107410.3;Solyc01g110130.3;Solyc01g111500.3;Solyc02g036430.2;Solyc02g038690.1;Solyc02g070780.4;Solyc02g082180.3;Solyc02g082700.3;Solyc02g085160.1;Solyc02g090400.4;Solyc02g092570.1;Solyc02g092930.1;So…
GO:0016298	lipase activity	3	3/1315	19/18268	2.19	0.152781	0.527834	Solyc01g005400.3/Solyc03g119980.3/Solyc07g032170.3	Solyc01g005400.3;Solyc03g119980.3;Solyc07g032170.3
GO:0043178	alcohol binding	3	3/1315	19/18268	2.19	0.152781	0.527834	Solyc03g095780.3/Solyc08g082180.3/Solyc10g076410.1	Solyc03g095780.3;Solyc08g082180.3;Solyc10g076410.1
GO:0052689	carboxylic ester hydrolase activity	3	3/1315	19/18268	2.19	0.152781	0.527834	Solyc03g119980.3/Solyc07g032170.3/Solyc12g005300.2	Solyc03g119980.3;Solyc07g032170.3;Solyc12g005300.2
GO:0004144	diacylglycerol O-acyltransferase activity	2	2/1315	10/18268	2.78	0.158728	0.527834	Solyc01g107900.3/Solyc10g009430.3	Solyc01g107900.3;Solyc10g009430.3
GO:0005247	voltage-gated chloride channel activity	2	2/1315	10/18268	2.78	0.158728	0.527834	Solanum_lycopersicum_newGene_3264/Solyc01g103140.3	--;Solyc01g103140.3
GO:0008374	O-acyltransferase activity	4	4/1315	30/18268	1.85	0.166302	0.527834	Solyc03g119980.3/Solyc11g012220.1/Solyc11g012230.3/Solyc11g012240.1	Solyc03g119980.3;Solyc11g012220.1;Solyc11g012230.3;Solyc11g012240.1
GO:0008080	N-acetyltransferase activity	6	6/1315	52/18268	1.6	0.168862	0.527834	Solanum_lycopersicum_newGene_633/Solyc08g006765.1/Solyc08g068700.1/Solyc09g082220.1/Solyc09g082230.1/Solyc12g099940.2	--;Solyc08g006765.1;Solyc08g068700.1;Solyc09g082220.1;Solyc09g082230.1;Solyc12g099940.2
GO:0016620	oxidoreductase activity, acting on the aldehyde or oxo group of donors, NAD or NADP as acceptor	4	4/1315	31/18268	1.79	0.180808	0.527834	Solyc02g020940.3/Solyc07g005390.3/Solyc12g007030.3/Solyc12g099290.2	Solyc02g020940.3;Solyc07g005390.3;Solyc12g007030.3;Solyc12g099290.2
GO:0004743	pyruvate kinase activity	2	2/1315	11/18268	2.53	0.185184	0.527834	Solyc04g008740.3/Solyc09g008840.4	Solyc04g008740.3;Solyc09g008840.4
GO:0008083	growth factor activity	2	2/1315	11/18268	2.53	0.185184	0.527834	Solanum_lycopersicum_newGene_1690/Solyc01g106830.4	--;Solyc01g106830.4
GO:0019212	phosphatase inhibitor activity	2	2/1315	11/18268	2.53	0.185184	0.527834	Solyc03g095780.3/Solyc10g076410.1	Solyc03g095780.3;Solyc10g076410.1
GO:0030955	potassium ion binding	2	2/1315	11/18268	2.53	0.185184	0.527834	Solyc04g008740.3/Solyc09g008840.4	Solyc04g008740.3;Solyc09g008840.4
GO:0005506	iron ion binding	36	36/1315	429/18268	1.17	0.189497	0.527834	Solanum_lycopersicum_newGene_1627/Solyc01g008110.4/Solyc01g088400.4/Solyc01g088430.4/Solyc01g091320.3/Solyc01g096670.4/Solyc02g063240.4/Solyc02g065190.3/Solyc02g065230.3/Solyc02g070580.1/Solyc02g080330.4/Solyc02g082070.4/Solyc02g084740.4/Solyc02g092710.3/Solyc02g092860.3/Solyc03g111300.1/Solyc03g122360.3/Solyc04g081930.3/Solyc05g044630.3/Solyc06g076170.4/Solyc07g006890.1/Solyc07g049690.3/Solyc07g…	--;Solyc01g008110.4;Solyc01g088400.4;Solyc01g088430.4;Solyc01g091320.3;Solyc01g096670.4;Solyc02g063240.4;Solyc02g065190.3;Solyc02g065230.3;Solyc02g070580.1;Solyc02g080330.4;Solyc02g082070.4;Solyc02g084740.4;Solyc02g092710.3;Solyc02g092860.3;Solyc03g111300.1;Solyc03g122360.3;Solyc04g081930.3;Solyc05g044630.3;Solyc06g076170.4;Solyc07g006890.1;Solyc07g049690.3;Solyc07g055460.3;Solyc07g055470.3;Solyc…
GO:0016705	oxidoreductase activity, acting on paired donors, with incorporation or reduction of molecular oxygen	31	31/1315	367/18268	1.17	0.199938	0.527834	Solanum_lycopersicum_newGene_1627/Solyc01g008110.4/Solyc01g096670.4/Solyc02g065190.3/Solyc02g065230.3/Solyc02g070580.1/Solyc02g080330.4/Solyc02g082070.4/Solyc02g084740.4/Solyc02g092710.3/Solyc02g092860.3/Solyc03g111300.1/Solyc03g122360.3/Solyc04g081930.3/Solyc06g074240.3/Solyc06g076170.4/Solyc07g006890.1/Solyc07g049690.3/Solyc07g055460.3/Solyc07g055470.3/Solyc07g062520.3/Solyc08g005610.3/Solyc09g…	--;Solyc01g008110.4;Solyc01g096670.4;Solyc02g065190.3;Solyc02g065230.3;Solyc02g070580.1;Solyc02g080330.4;Solyc02g082070.4;Solyc02g084740.4;Solyc02g092710.3;Solyc02g092860.3;Solyc03g111300.1;Solyc03g122360.3;Solyc04g081930.3;Solyc06g074240.3;Solyc06g076170.4;Solyc07g006890.1;Solyc07g049690.3;Solyc07g055460.3;Solyc07g055470.3;Solyc07g062520.3;Solyc08g005610.3;Solyc09g092580.4;Solyc09g092670.3;Solyc…
GO:0000234	phosphoethanolamine N-methyltransferase activity	1	1/1315	3/18268	4.63	0.20079	0.527834	Solyc12g040790.2	Solyc12g040790.2
GO:0000703	oxidized pyrimidine nucleobase lesion DNA N-glycosylase activity	1	1/1315	3/18268	4.63	0.20079	0.527834	Solyc09g083007.1	Solyc09g083007.1
GO:0001882	nucleoside binding	1	1/1315	3/18268	4.63	0.20079	0.527834	Solyc12g035420.3	Solyc12g035420.3
GO:0001883	purine nucleoside binding	1	1/1315	3/18268	4.63	0.20079	0.527834	Solyc12g035420.3	Solyc12g035420.3
GO:0002151	G-quadruplex RNA binding	1	1/1315	3/18268	4.63	0.20079	0.527834	Solyc07g032510.3	Solyc07g032510.3
GO:0003839	gamma-glutamylcyclotransferase activity	1	1/1315	3/18268	4.63	0.20079	0.527834	Solyc08g006150.3	Solyc08g006150.3
GO:0003855	3-dehydroquinate dehydratase activity	1	1/1315	3/18268	4.63	0.20079	0.527834	Solyc10g038080.3	Solyc10g038080.3
GO:0003983	UTP:glucose-1-phosphate uridylyltransferase activity	1	1/1315	3/18268	4.63	0.20079	0.527834	Solyc04g058070.3	Solyc04g058070.3
GO:0004121	cystathionine beta-lyase activity	1	1/1315	3/18268	4.63	0.20079	0.527834	Solyc04g055230.2	Solyc04g055230.2
GO:0004170	dUTP diphosphatase activity	1	1/1315	3/18268	4.63	0.20079	0.527834	Solyc01g097970.4	Solyc01g097970.4
GO:0004348	glucosylceramidase activity	1	1/1315	3/18268	4.63	0.20079	0.527834	Solyc11g042460.2	Solyc11g042460.2
GO:0004419	hydroxymethylglutaryl-CoA lyase activity	1	1/1315	3/18268	4.63	0.20079	0.527834	Solyc06g011530.3	Solyc06g011530.3
GO:0004476	mannose-6-phosphate isomerase activity	1	1/1315	3/18268	4.63	0.20079	0.527834	Solyc02g086090.4	Solyc02g086090.4
GO:0004563	beta-N-acetylhexosaminidase activity	1	1/1315	3/18268	4.63	0.20079	0.527834	Solyc11g008810.2	Solyc11g008810.2
GO:0004594	pantothenate kinase activity	1	1/1315	3/18268	4.63	0.20079	0.527834	Solyc05g005250.3	Solyc05g005250.3
GO:0004619	phosphoglycerate mutase activity	1	1/1315	3/18268	4.63	0.20079	0.527834	Solyc04g072800.4	Solyc04g072800.4
GO:0004649	poly(ADP-ribose) glycohydrolase activity	1	1/1315	3/18268	4.63	0.20079	0.527834	Solyc12g096610.2	Solyc12g096610.2
GO:0004665	prephenate dehydrogenase (NADP+) activity	1	1/1315	3/18268	4.63	0.20079	0.527834	Solyc09g011870.3	Solyc09g011870.3
GO:0004764	shikimate 3-dehydrogenase (NADP+) activity	1	1/1315	3/18268	4.63	0.20079	0.527834	Solyc10g038080.3	Solyc10g038080.3
GO:0004802	transketolase activity	1	1/1315	3/18268	4.63	0.20079	0.527834	Solyc10g018300.3	Solyc10g018300.3
GO:0008106	alcohol dehydrogenase (NADP+) activity	1	1/1315	3/18268	4.63	0.20079	0.527834	Solyc03g098460.3	Solyc03g098460.3
GO:0008107	galactoside 2-alpha-L-fucosyltransferase activity	1	1/1315	3/18268	4.63	0.20079	0.527834	Solyc03g115830.2	Solyc03g115830.2
GO:0008373	sialyltransferase activity	1	1/1315	3/18268	4.63	0.20079	0.527834	Solyc06g074370.3	Solyc06g074370.3
GO:0008883	glutamyl-tRNA reductase activity	1	1/1315	3/18268	4.63	0.20079	0.527834	Solyc01g106390.3	Solyc01g106390.3
GO:0008977	prephenate dehydrogenase (NAD+) activity	1	1/1315	3/18268	4.63	0.20079	0.527834	Solyc09g011870.3	Solyc09g011870.3
GO:0009044	xylan 1,4-beta-xylosidase activity	1	1/1315	3/18268	4.63	0.20079	0.527834	Solyc04g072850.4	Solyc04g072850.4
GO:0010309	acireductone dioxygenase [iron(II)-requiring] activity	1	1/1315	3/18268	4.63	0.20079	0.527834	Solyc09g082650.4	Solyc09g082650.4
GO:0016985	mannan endo-1,4-beta-mannosidase activity	1	1/1315	3/18268	4.63	0.20079	0.527834	Solyc12g013750.2	Solyc12g013750.2
GO:0017176	phosphatidylinositol N-acetylglucosaminyltransferase activity	1	1/1315	3/18268	4.63	0.20079	0.527834	Solyc02g081610.3	Solyc02g081610.3
GO:0019001	guanyl nucleotide binding	1	1/1315	3/18268	4.63	0.20079	0.527834	Solyc12g035420.3	Solyc12g035420.3
GO:0032550	purine ribonucleoside binding	1	1/1315	3/18268	4.63	0.20079	0.527834	Solyc12g035420.3	Solyc12g035420.3
GO:0032561	guanyl ribonucleotide binding	1	1/1315	3/18268	4.63	0.20079	0.527834	Solyc12g035420.3	Solyc12g035420.3
GO:0051060	pullulanase activity	1	1/1315	3/18268	4.63	0.20079	0.527834	Solyc11g008060.1	Solyc11g008060.1
GO:0071617	lysophospholipid acyltransferase activity	1	1/1315	3/18268	4.63	0.20079	0.527834	Solyc07g032170.3	Solyc07g032170.3
GO:0102148	N-acetyl-beta-D-galactosaminidase activity	1	1/1315	3/18268	4.63	0.20079	0.527834	Solyc11g008810.2	Solyc11g008810.2
GO:0003684	damaged DNA binding	3	3/1315	22/18268	1.89	0.208117	0.541369	Solyc01g107510.3/Solyc04g007120.4/Solyc09g031610.4	Solyc01g107510.3;Solyc04g007120.4;Solyc09g031610.4
GO:0004866	endopeptidase inhibitor activity	3	3/1315	22/18268	1.89	0.208117	0.541369	Solyc03g020010.1/Solyc03g098720.3/Solyc03g098740.1	Solyc03g020010.1;Solyc03g098720.3;Solyc03g098740.1
GO:0030170	pyridoxal phosphate binding	12	12/1315	128/18268	1.3	0.210637	0.543434	Solyc02g091900.4/Solyc04g055230.2/Solyc07g043310.3/Solyc07g066480.3/Solyc08g006740.3/Solyc08g006750.4/Solyc08g068600.3/Solyc08g068610.3/Solyc08g068680.4/Solyc08g080370.3/Solyc11g013170.2/Solyc11g019960.2	Solyc02g091900.4;Solyc04g055230.2;Solyc07g043310.3;Solyc07g066480.3;Solyc08g006740.3;Solyc08g006750.4;Solyc08g068600.3;Solyc08g068610.3;Solyc08g068680.4;Solyc08g080370.3;Solyc11g013170.2;Solyc11g019960.2
GO:0005385	zinc ion transmembrane transporter activity	2	2/1315	12/18268	2.32	0.212192	0.543434	Solyc02g032100.4/Solyc07g043230.3	Solyc02g032100.4;Solyc07g043230.3
GO:0019208	phosphatase regulator activity	2	2/1315	12/18268	2.32	0.212192	0.543434	Solyc03g095780.3/Solyc10g076410.1	Solyc03g095780.3;Solyc10g076410.1
GO:0050661	NADP binding	7	7/1315	68/18268	1.43	0.21622	0.549749	Solyc01g081510.4/Solyc01g106390.3/Solyc01g112100.3/Solyc02g020940.3/Solyc03g097910.4/Solyc05g010260.4/Solyc12g056120.1	Solyc01g081510.4;Solyc01g106390.3;Solyc01g112100.3;Solyc02g020940.3;Solyc03g097910.4;Solyc05g010260.4;Solyc12g056120.1
GO:0015297	antiporter activity	8	8/1315	80/18268	1.39	0.216871	0.549749	Solyc03g025200.3/Solyc03g025220.3/Solyc04g009790.4/Solyc04g074860.4/Solyc05g008510.3/Solyc07g008410.4/Solyc08g079730.2/Solyc10g007100.3	Solyc03g025200.3;Solyc03g025220.3;Solyc04g009790.4;Solyc04g074860.4;Solyc05g008510.3;Solyc07g008410.4;Solyc08g079730.2;Solyc10g007100.3
GO:0004842	ubiquitin-protein transferase activity	21	21/1315	245/18268	1.19	0.232696	0.583404	Solyc01g086960.3/Solyc03g034020.4/Solyc03g093450.3/Solyc03g116480.1/Solyc04g007640.3/Solyc04g057940.4/Solyc04g071030.1/Solyc05g005670.1/Solyc05g007895.1/Solyc05g008640.1/Solyc06g073890.3/Solyc07g020870.3/Solyc07g045190.3/Solyc08g042100.3/Solyc08g077100.3/Solyc09g018230.1/Solyc09g065870.4/Solyc10g007000.3/Solyc10g083470.2/Solyc11g005700.1/Solyc12g008990.2	Solyc01g086960.3;Solyc03g034020.4;Solyc03g093450.3;Solyc03g116480.1;Solyc04g007640.3;Solyc04g057940.4;Solyc04g071030.1;Solyc05g005670.1;Solyc05g007895.1;Solyc05g008640.1;Solyc06g073890.3;Solyc07g020870.3;Solyc07g045190.3;Solyc08g042100.3;Solyc08g077100.3;Solyc09g018230.1;Solyc09g065870.4;Solyc10g007000.3;Solyc10g083470.2;Solyc11g005700.1;Solyc12g008990.2
GO:0016787	hydrolase activity	55	55/1315	691/18268	1.11	0.23457	0.583404	Solanum_lycopersicum_newGene_2940/Solyc01g005400.3/Solyc01g007267.1/Solyc01g088490.3/Solyc01g095670.4/Solyc01g098140.4/Solyc01g106330.3/Solyc01g108530.3/Solyc01g108540.3/Solyc01g108580.3/Solyc01g108775.1/Solyc01g108780.4/Solyc02g069500.1/Solyc02g072010.3/Solyc02g085650.4/Solyc03g034320.3/Solyc03g113750.3/Solyc03g116540.1/Solyc03g119980.3/Solyc03g121270.3/Solyc04g010050.4/Solyc04g010060.2/Solyc04g…	--;Solyc01g005400.3;Solyc01g007267.1;Solyc01g088490.3;Solyc01g095670.4;Solyc01g098140.4;Solyc01g106330.3;Solyc01g108530.3;Solyc01g108540.3;Solyc01g108580.3;Solyc01g108775.1;Solyc01g108780.4;Solyc02g069500.1;Solyc02g072010.3;Solyc02g085650.4;Solyc03g034320.3;Solyc03g113750.3;Solyc03g116540.1;Solyc03g119980.3;Solyc03g121270.3;Solyc04g010050.4;Solyc04g010060.2;Solyc04g014500.3;Solyc04g016490.4;Solyc…
GO:0004864	protein phosphatase inhibitor activity	3	3/1315	24/18268	1.74	0.247127	0.583404	Solyc03g095780.3/Solyc06g050500.2/Solyc10g076410.1	Solyc03g095780.3;Solyc06g050500.2;Solyc10g076410.1
GO:0060089	molecular transducer activity	3	3/1315	24/18268	1.74	0.247127	0.583404	Solyc01g107250.3/Solyc03g095780.3/Solyc10g076410.1	Solyc01g107250.3;Solyc03g095780.3;Solyc10g076410.1
GO:0061659	ubiquitin-like protein ligase activity	5	5/1315	47/18268	1.48	0.248093	0.583404	Solyc05g007895.1/Solyc05g008640.1/Solyc06g073890.3/Solyc07g045190.3/Solyc10g007000.3	Solyc05g007895.1;Solyc05g008640.1;Solyc06g073890.3;Solyc07g045190.3;Solyc10g007000.3
GO:0000149	SNARE binding	1	1/1315	4/18268	3.47	0.258329	0.583404	Solyc02g082690.3	Solyc02g082690.3
GO:0003995	acyl-CoA dehydrogenase activity	1	1/1315	4/18268	3.47	0.258329	0.583404	Solyc10g085200.2	Solyc10g085200.2
GO:0003997	acyl-CoA oxidase activity	1	1/1315	4/18268	3.47	0.258329	0.583404	Solyc08g078390.4	Solyc08g078390.4
GO:0004042	acetyl-CoA:L-glutamate N-acetyltransferase activity	1	1/1315	4/18268	3.47	0.258329	0.583404	Solyc02g092260.3	Solyc02g092260.3
GO:0004333	fumarate hydratase activity	1	1/1315	4/18268	3.47	0.258329	0.583404	Solyc09g075450.3	Solyc09g075450.3
GO:0004420	hydroxymethylglutaryl-CoA reductase (NADPH) activity	1	1/1315	4/18268	3.47	0.258329	0.583404	Solyc02g082260.3	Solyc02g082260.3
GO:0004421	hydroxymethylglutaryl-CoA synthase activity	1	1/1315	4/18268	3.47	0.258329	0.583404	Solyc08g080160.4	Solyc08g080160.4
GO:0004654	polyribonucleotide nucleotidyltransferase activity	1	1/1315	4/18268	3.47	0.258329	0.583404	Solyc02g086590.3	Solyc02g086590.3
GO:0004751	ribose-5-phosphate isomerase activity	1	1/1315	4/18268	3.47	0.258329	0.583404	Solyc01g097460.3	Solyc01g097460.3
GO:0008934	inositol monophosphate 1-phosphatase activity	1	1/1315	4/18268	3.47	0.258329	0.583404	Solyc11g012410.2	Solyc11g012410.2
GO:0010279	indole-3-acetic acid amido synthetase activity	1	1/1315	4/18268	3.47	0.258329	0.583404	Solyc07g063850.3	Solyc07g063850.3
GO:0016149	translation release factor activity, codon specific	1	1/1315	4/18268	3.47	0.258329	0.583404	Solyc09g074650.3	Solyc09g074650.3
GO:0019825	oxygen binding	1	1/1315	4/18268	3.47	0.258329	0.583404	Solyc08g068070.3	Solyc08g068070.3
GO:0019905	syntaxin binding	1	1/1315	4/18268	3.47	0.258329	0.583404	Solyc02g082690.3	Solyc02g082690.3
GO:0047334	diphosphate-fructose-6-phosphate 1-phosphotransferase activity	1	1/1315	4/18268	3.47	0.258329	0.583404	Solyc12g095760.2	Solyc12g095760.2
GO:0047746	chlorophyllase activity	1	1/1315	4/18268	3.47	0.258329	0.583404	Solyc12g005300.2	Solyc12g005300.2
GO:0052832	inositol monophosphate 3-phosphatase activity	1	1/1315	4/18268	3.47	0.258329	0.583404	Solyc11g012410.2	Solyc11g012410.2
GO:0052833	inositol monophosphate 4-phosphatase activity	1	1/1315	4/18268	3.47	0.258329	0.583404	Solyc11g012410.2	Solyc11g012410.2
GO:0070569	uridylyltransferase activity	1	1/1315	4/18268	3.47	0.258329	0.583404	Solyc06g051080.4	Solyc06g051080.4
GO:0003872	6-phosphofructokinase activity	2	2/1315	14/18268	1.98	0.26703	0.594942	Solyc12g095760.2/Solyc12g095880.2	Solyc12g095760.2;Solyc12g095880.2
GO:0003950	NAD+ ADP-ribosyltransferase activity	2	2/1315	14/18268	1.98	0.26703	0.594942	Solanum_lycopersicum_newGene_314/Solyc05g005280.4	--;Solyc05g005280.4
GO:0016614	oxidoreductase activity, acting on CH-OH group of donors	2	2/1315	14/18268	1.98	0.26703	0.594942	Solyc03g098460.3/Solyc03g121600.4	Solyc03g098460.3;Solyc03g121600.4
GO:0038023	signaling receptor activity	4	4/1315	37/18268	1.5	0.274835	0.609595	Solyc01g107250.3/Solyc03g095780.3/Solyc06g050500.2/Solyc10g076410.1	Solyc01g107250.3;Solyc03g095780.3;Solyc06g050500.2;Solyc10g076410.1
GO:0016757	transferase activity, transferring glycosyl groups	16	16/1315	188/18268	1.18	0.279216	0.614475	Solyc01g086640.2/Solyc01g088790.2/Solyc01g095290.4/Solyc02g065530.4/Solyc02g069240.1/Solyc02g092840.1/Solyc04g080080.3/Solyc05g006510.2/Solyc05g009820.4/Solyc05g055420.4/Solyc06g063240.3/Solyc08g078380.3/Solyc09g075560.1/Solyc11g013270.2/Solyc11g044570.3/Solyc12g008340.2	Solyc01g086640.2;Solyc01g088790.2;Solyc01g095290.4;Solyc02g065530.4;Solyc02g069240.1;Solyc02g092840.1;Solyc04g080080.3;Solyc05g006510.2;Solyc05g009820.4;Solyc05g055420.4;Solyc06g063240.3;Solyc08g078380.3;Solyc09g075560.1;Solyc11g013270.2;Solyc11g044570.3;Solyc12g008340.2
GO:0004674	protein serine/threonine kinase activity	38	38/1315	477/18268	1.11	0.279508	0.614475	Solyc01g008500.4/Solyc01g107250.3/Solyc02g072440.4/Solyc02g079550.3/Solyc02g079570.4/Solyc03g006030.4/Solyc03g007790.3/Solyc03g026040.4/Solyc03g082450.3/Solyc03g083590.3/Solyc03g095510.3/Solyc03g097920.1/Solyc03g112050.4/Solyc04g011520.3/Solyc04g014883.1/Solyc04g015460.4/Solyc04g039730.3/Solyc04g077340.3/Solyc04g077360.3/Solyc04g077370.2/Solyc05g013300.1/Solyc05g013320.1/Solyc06g007440.4/Solyc06g…	Solyc01g008500.4;Solyc01g107250.3;Solyc02g072440.4;Solyc02g079550.3;Solyc02g079570.4;Solyc03g006030.4;Solyc03g007790.3;Solyc03g026040.4;Solyc03g082450.3;Solyc03g083590.3;Solyc03g095510.3;Solyc03g097920.1;Solyc03g112050.4;Solyc04g011520.3;Solyc04g014883.1;Solyc04g015460.4;Solyc04g039730.3;Solyc04g077340.3;Solyc04g077360.3;Solyc04g077370.2;Solyc05g013300.1;Solyc05g013320.1;Solyc06g007440.4;Solyc06g…
GO:0098772	molecular function regulator	7	7/1315	74/18268	1.31	0.282723	0.618804	Solyc02g082690.3/Solyc03g095780.3/Solyc07g049580.3/Solyc07g065090.2/Solyc09g011030.3/Solyc09g014480.3/Solyc10g076410.1	Solyc02g082690.3;Solyc03g095780.3;Solyc07g049580.3;Solyc07g065090.2;Solyc09g011030.3;Solyc09g014480.3;Solyc10g076410.1
GO:0017076	purine nucleotide binding	3	3/1315	26/18268	1.6	0.287121	0.622943	Solyc01g100370.3/Solyc02g093300.3/Solyc12g035420.3	Solyc01g100370.3;Solyc02g093300.3;Solyc12g035420.3
GO:0019901	protein kinase binding	3	3/1315	26/18268	1.6	0.287121	0.622943	Solyc01g089850.4/Solyc01g098930.3/Solyc03g093790.3	Solyc01g089850.4;Solyc01g098930.3;Solyc03g093790.3
GO:0050660	flavin adenine dinucleotide binding	8	8/1315	87/18268	1.28	0.288528	0.623273	Solyc01g112100.3/Solyc03g121600.4/Solyc05g053300.3/Solyc08g005630.3/Solyc08g075240.3/Solyc08g078390.4/Solyc09g072610.3/Solyc10g085200.2	Solyc01g112100.3;Solyc03g121600.4;Solyc05g053300.3;Solyc08g005630.3;Solyc08g075240.3;Solyc08g078390.4;Solyc09g072610.3;Solyc10g085200.2
GO:0031418	L-ascorbic acid binding	2	2/1315	15/18268	1.85	0.294509	0.624517	Solyc02g092710.3/Solyc04g081930.3	Solyc02g092710.3;Solyc04g081930.3
GO:0070290	N-acylphosphatidylethanolamine-specific phospholipase D activity	2	2/1315	15/18268	1.85	0.294509	0.624517	Solyc01g100020.4/Solyc08g066790.4	Solyc01g100020.4;Solyc08g066790.4
GO:0030234	enzyme regulator activity	7	7/1315	76/18268	1.28	0.305939	0.624517	Solyc02g082690.3/Solyc03g095780.3/Solyc07g049580.3/Solyc07g065090.2/Solyc09g011030.3/Solyc09g014480.3/Solyc10g076410.1	Solyc02g082690.3;Solyc03g095780.3;Solyc07g049580.3;Solyc07g065090.2;Solyc09g011030.3;Solyc09g014480.3;Solyc10g076410.1
GO:0042562	hormone binding	3	3/1315	27/18268	1.54	0.307314	0.624517	Solyc03g095780.3/Solyc08g082180.3/Solyc10g076410.1	Solyc03g095780.3;Solyc08g082180.3;Solyc10g076410.1
GO:0004014	adenosylmethionine decarboxylase activity	1	1/1315	5/18268	2.78	0.311729	0.624517	Solyc05g010420.2	Solyc05g010420.2
GO:0004396	hexokinase activity	1	1/1315	5/18268	2.78	0.311729	0.624517	Solyc06g066440.3	Solyc06g066440.3
GO:0004462	lactoylglutathione lyase activity	1	1/1315	5/18268	2.78	0.311729	0.624517	Solyc02g084410.3	Solyc02g084410.3
GO:0004623	phospholipase A2 activity	1	1/1315	5/18268	2.78	0.311729	0.624517	Solyc07g032170.3	Solyc07g032170.3
GO:0004693	cyclin-dependent protein serine/threonine kinase activity	1	1/1315	5/18268	2.78	0.311729	0.624517	Solyc04g082840.4	Solyc04g082840.4
GO:0005471	ATP:ADP antiporter activity	1	1/1315	5/18268	2.78	0.311729	0.624517	Solyc12g042950.2	Solyc12g042950.2
GO:0008113	peptide-methionine (S)-S-oxide reductase activity	1	1/1315	5/18268	2.78	0.311729	0.624517	Solyc02g063250.3	Solyc02g063250.3
GO:0015165	pyrimidine nucleotide-sugar transmembrane transporter activity	1	1/1315	5/18268	2.78	0.311729	0.624517	Solyc09g098520.4	Solyc09g098520.4
GO:0017057	6-phosphogluconolactonase activity	1	1/1315	5/18268	2.78	0.311729	0.624517	Solyc05g012110.4	Solyc05g012110.4
GO:0017108	5'-flap endonuclease activity	1	1/1315	5/18268	2.78	0.311729	0.624517	Solyc01g088380.3	Solyc01g088380.3
GO:0019199	transmembrane receptor protein kinase activity	1	1/1315	5/18268	2.78	0.311729	0.624517	Solyc01g107250.3	Solyc01g107250.3
GO:0080043	quercetin 3-O-glucosyltransferase activity	1	1/1315	5/18268	2.78	0.311729	0.624517	Solyc12g096820.1	Solyc12g096820.1
GO:0080044	quercetin 7-O-glucosyltransferase activity	1	1/1315	5/18268	2.78	0.311729	0.624517	Solyc12g096820.1	Solyc12g096820.1
GO:0098599	palmitoyl hydrolase activity	1	1/1315	5/18268	2.78	0.311729	0.624517	Solyc01g090410.3	Solyc01g090410.3
GO:0005524	ATP binding	189	189/1315	2539/18268	1.03	0.315263	0.629059	Solyc01g005540.4/Solyc01g008500.4/Solyc01g009010.3/Solyc01g009300.3/Solyc01g056850.3/Solyc01g066820.4/Solyc01g067510.3/Solyc01g079500.4/Solyc01g088380.3/Solyc01g089970.3/Solyc01g090650.1/Solyc01g096930.3/Solyc01g098410.4/Solyc01g098840.3/Solyc01g101040.3/Solyc01g101060.4/Solyc01g103450.3/Solyc01g105160.4/Solyc01g106055.1/Solyc01g106500.4/Solyc01g108000.3/Solyc01g110130.3/Solyc01g111880.4/Solyc02g…	Solyc01g005540.4;Solyc01g008500.4;Solyc01g009010.3;Solyc01g009300.3;Solyc01g056850.3;Solyc01g066820.4;Solyc01g067510.3;Solyc01g079500.4;Solyc01g088380.3;Solyc01g089970.3;Solyc01g090650.1;Solyc01g096930.3;Solyc01g098410.4;Solyc01g098840.3;Solyc01g101040.3;Solyc01g101060.4;Solyc01g103450.3;Solyc01g105160.4;Solyc01g106055.1;Solyc01g106500.4;Solyc01g108000.3;Solyc01g110130.3;Solyc01g111880.4;Solyc02g…
GO:0042910	xenobiotic transporter activity	7	7/1315	77/18268	1.26	0.317688	0.631363	Solyc03g025200.3/Solyc03g025220.3/Solyc04g074860.4/Solyc05g008510.3/Solyc07g008410.4/Solyc08g079730.2/Solyc10g007100.3	Solyc03g025200.3;Solyc03g025220.3;Solyc04g074860.4;Solyc05g008510.3;Solyc07g008410.4;Solyc08g079730.2;Solyc10g007100.3
GO:0016301	kinase activity	8	8/1315	90/18268	1.23	0.320915	0.634522	Solyc01g095990.3/Solyc01g107250.3/Solyc03g117290.1/Solyc04g007390.4/Solyc04g008740.3/Solyc08g078370.4/Solyc09g008840.4/Solyc09g074970.3	Solyc01g095990.3;Solyc01g107250.3;Solyc03g117290.1;Solyc04g007390.4;Solyc04g008740.3;Solyc08g078370.4;Solyc09g008840.4;Solyc09g074970.3
GO:0004630	phospholipase D activity	2	2/1315	16/18268	1.74	0.321832	0.634522	Solyc01g100020.4/Solyc08g066790.4	Solyc01g100020.4;Solyc08g066790.4
GO:0097367	carbohydrate derivative binding	4	4/1315	40/18268	1.39	0.324576	0.637404	Solyc01g087870.4/Solyc01g095670.4/Solyc01g100370.3/Solyc12g035420.3	Solyc01g087870.4;Solyc01g095670.4;Solyc01g100370.3;Solyc12g035420.3
GO:0016874	ligase activity	3	3/1315	28/18268	1.49	0.327554	0.64072	Solyc01g108030.4/Solyc03g096930.4/Solyc07g063850.3	Solyc01g108030.4;Solyc03g096930.4;Solyc07g063850.3
GO:0004497	monooxygenase activity	19	19/1315	235/18268	1.12	0.332964	0.645693	Solyc01g008110.4/Solyc01g096670.4/Solyc02g065190.3/Solyc02g065230.3/Solyc02g070580.1/Solyc02g080330.4/Solyc02g082070.4/Solyc02g084740.4/Solyc02g092860.3/Solyc03g111300.1/Solyc07g049690.3/Solyc08g005610.3/Solyc09g092580.4/Solyc09g092670.3/Solyc10g080840.1/Solyc10g083690.3/Solyc10g084590.2/Solyc11g040223.1/Solyc12g006860.2	Solyc01g008110.4;Solyc01g096670.4;Solyc02g065190.3;Solyc02g065230.3;Solyc02g070580.1;Solyc02g080330.4;Solyc02g082070.4;Solyc02g084740.4;Solyc02g092860.3;Solyc03g111300.1;Solyc07g049690.3;Solyc08g005610.3;Solyc09g092580.4;Solyc09g092670.3;Solyc10g080840.1;Solyc10g083690.3;Solyc10g084590.2;Solyc11g040223.1;Solyc12g006860.2
GO:0020037	heme binding	43	43/1315	558/18268	1.07	0.342035	0.645693	Solanum_lycopersicum_newGene_1627/Solyc01g007950.4/Solyc01g008110.4/Solyc01g096270.3/Solyc01g096670.4/Solyc01g104860.3/Solyc02g065190.3/Solyc02g065230.3/Solyc02g070580.1/Solyc02g080330.4/Solyc02g082070.4/Solyc02g084740.4/Solyc02g090450.3/Solyc02g092580.3/Solyc02g092860.3/Solyc03g082600.4/Solyc03g111300.1/Solyc03g122360.3/Solyc04g054980.3/Solyc04g071890.3/Solyc06g076170.4/Solyc07g006890.1/Solyc07g…	--;Solyc01g007950.4;Solyc01g008110.4;Solyc01g096270.3;Solyc01g096670.4;Solyc01g104860.3;Solyc02g065190.3;Solyc02g065230.3;Solyc02g070580.1;Solyc02g080330.4;Solyc02g082070.4;Solyc02g084740.4;Solyc02g090450.3;Solyc02g092580.3;Solyc02g092860.3;Solyc03g082600.4;Solyc03g111300.1;Solyc03g122360.3;Solyc04g054980.3;Solyc04g071890.3;Solyc06g076170.4;Solyc07g006890.1;Solyc07g049690.3;Solyc07g055460.3;Solyc…
GO:0016779	nucleotidyltransferase activity	3	3/1315	29/18268	1.44	0.347784	0.645693	Solanum_lycopersicum_newGene_3021/Solyc01g009670.4/Solyc01g107510.3	--;Solyc01g009670.4;Solyc01g107510.3
GO:0051536	iron-sulfur cluster binding	3	3/1315	29/18268	1.44	0.347784	0.645693	Solyc03g097910.4/Solyc05g044630.3/Solyc10g050890.2	Solyc03g097910.4;Solyc05g044630.3;Solyc10g050890.2
GO:0005544	calcium-dependent phospholipid binding	2	2/1315	17/18268	1.63	0.34888	0.645693	Solyc01g097510.4/Solyc03g118200.4	Solyc01g097510.4;Solyc03g118200.4
GO:0008081	phosphoric diester hydrolase activity	2	2/1315	17/18268	1.63	0.34888	0.645693	Solyc02g094400.4/Solyc10g055240.2	Solyc02g094400.4;Solyc10g055240.2
GO:0016702	oxidoreductase activity, acting on single donors with incorporation of molecular oxygen, incorporation of two atoms of oxygen	4	4/1315	42/18268	1.32	0.358075	0.645693	Solanum_lycopersicum_newGene_2882/Solyc01g099150.5.1/Solyc01g099160.4/Solyc08g014000.3	--;Solyc01g099150.5.1;Solyc01g099160.4;Solyc08g014000.3
GO:0044389	ubiquitin-like protein ligase binding	4	4/1315	42/18268	1.32	0.358075	0.645693	Solyc02g093910.3/Solyc03g120320.1/Solyc09g011030.3/Solyc10g007000.3	Solyc02g093910.3;Solyc03g120320.1;Solyc09g011030.3;Solyc10g007000.3
GO:0000175	3'-5'-exoribonuclease activity	1	1/1315	6/18268	2.32	0.361287	0.645693	Solyc06g082810.3	Solyc06g082810.3
GO:0004034	aldose 1-epimerase activity	1	1/1315	6/18268	2.32	0.361287	0.645693	Solyc02g087780.3	Solyc02g087780.3
GO:0004176	ATP-dependent peptidase activity	1	1/1315	6/18268	2.32	0.361287	0.645693	Solyc08g077440.3	Solyc08g077440.3
GO:0004634	phosphopyruvate hydratase activity	1	1/1315	6/18268	2.32	0.361287	0.645693	Solyc02g150124.1	Solyc02g150124.1
GO:0005534	galactose binding	1	1/1315	6/18268	2.32	0.361287	0.645693	Solyc07g016170.4	Solyc07g016170.4
GO:0005536	glucose binding	1	1/1315	6/18268	2.32	0.361287	0.645693	Solyc06g066440.3	Solyc06g066440.3
GO:0015369	calcium:proton antiporter activity	1	1/1315	6/18268	2.32	0.361287	0.645693	Solyc06g006110.3	Solyc06g006110.3
GO:0016208	AMP binding	1	1/1315	6/18268	2.32	0.361287	0.645693	Solyc01g100370.3	Solyc01g100370.3
GO:0016639	oxidoreductase activity, acting on the CH-NH2 group of donors, NAD or NADP as acceptor	1	1/1315	6/18268	2.32	0.361287	0.645693	Solyc05g052100.3	Solyc05g052100.3
GO:0030151	molybdenum ion binding	1	1/1315	6/18268	2.32	0.361287	0.645693	Solyc07g066480.3	Solyc07g066480.3
GO:0045296	cadherin binding	1	1/1315	6/18268	2.32	0.361287	0.645693	Solyc07g049580.3	Solyc07g049580.3
GO:0046556	alpha-L-arabinofuranosidase activity	1	1/1315	6/18268	2.32	0.361287	0.645693	Solyc04g072850.4	Solyc04g072850.4
GO:0048487	beta-tubulin binding	1	1/1315	6/18268	2.32	0.361287	0.645693	Solyc01g091080.3	Solyc01g091080.3
GO:0050839	cell adhesion molecule binding	1	1/1315	6/18268	2.32	0.361287	0.645693	Solyc07g049580.3	Solyc07g049580.3
GO:0070696	transmembrane receptor protein serine/threonine kinase binding	1	1/1315	6/18268	2.32	0.361287	0.645693	Solyc08g042100.3	Solyc08g042100.3
GO:0140078	class I DNA-(apurinic or apyrimidinic site) lyase activity	1	1/1315	6/18268	2.32	0.361287	0.645693	Solyc09g083007.1	Solyc09g083007.1
GO:0003682	chromatin binding	5	5/1315	55/18268	1.26	0.362744	0.645974	Solyc01g086690.2/Solyc01g110020.4/Solyc02g093300.3/Solyc11g030600.3/Solyc11g070160.2	Solyc01g086690.2;Solyc01g110020.4;Solyc02g093300.3;Solyc11g030600.3;Solyc11g070160.2
GO:0016829	lyase activity	3	3/1315	30/18268	1.39	0.367948	0.652901	Solyc04g076660.3/Solyc07g049690.3/Solyc07g066480.3	Solyc04g076660.3;Solyc07g049690.3;Solyc07g066480.3
GO:0004519	endonuclease activity	24	24/1315	308/18268	1.08	0.373221	0.659327	Solyc01g007267.1/Solyc01g088490.3/Solyc02g069500.1/Solyc02g072010.3/Solyc02g085650.4/Solyc03g113750.3/Solyc03g116540.1/Solyc04g010050.4/Solyc04g010060.2/Solyc04g064660.1/Solyc04g079150.1/Solyc05g006460.3/Solyc05g008330.3/Solyc05g012140.3/Solyc06g009800.3/Solyc06g069700.4/Solyc07g045370.3/Solyc08g023490.4/Solyc08g078570.3/Solyc08g079640.3/Solyc09g005710.3/Solyc09g083007.1/Solyc10g007520.3/Solyc11g…	Solyc01g007267.1;Solyc01g088490.3;Solyc02g069500.1;Solyc02g072010.3;Solyc02g085650.4;Solyc03g113750.3;Solyc03g116540.1;Solyc04g010050.4;Solyc04g010060.2;Solyc04g064660.1;Solyc04g079150.1;Solyc05g006460.3;Solyc05g008330.3;Solyc05g012140.3;Solyc06g009800.3;Solyc06g069700.4;Solyc07g045370.3;Solyc08g023490.4;Solyc08g078570.3;Solyc08g079640.3;Solyc09g005710.3;Solyc09g083007.1;Solyc10g007520.3;Solyc11g…
GO:0005102	receptor binding	4	4/1315	43/18268	1.29	0.374826	0.659327	Solyc01g107250.3/Solyc02g080610.4/Solyc03g043770.4/Solyc08g042100.3	Solyc01g107250.3;Solyc02g080610.4;Solyc03g043770.4;Solyc08g042100.3
GO:0016538	cyclin-dependent protein serine/threonine kinase regulator activity	2	2/1315	18/18268	1.54	0.375551	0.659327	Solyc02g082820.3/Solyc07g032480.3	Solyc02g082820.3;Solyc07g032480.3
GO:0022857	transmembrane transporter activity	25	25/1315	323/18268	1.08	0.3825	0.669162	Solyc01g010290.4/Solyc01g060070.3/Solyc01g096740.4/Solyc01g111800.4/Solyc03g005480.4/Solyc05g005910.4/Solyc05g005920.4/Solyc05g005970.3/Solyc05g005990.3/Solyc05g008770.3/Solyc05g045670.4/Solyc06g034290.3/Solyc06g075460.4/Solyc07g049310.3/Solyc07g063930.4/Solyc09g008370.1/Solyc09g008550.4/Solyc09g089860.4/Solyc10g084940.3/Solyc10g084950.3/Solyc11g008200.2/Solyc11g010690.3/Solyc12g010440.3/Solyc12g…	Solyc01g010290.4;Solyc01g060070.3;Solyc01g096740.4;Solyc01g111800.4;Solyc03g005480.4;Solyc05g005910.4;Solyc05g005920.4;Solyc05g005970.3;Solyc05g005990.3;Solyc05g008770.3;Solyc05g045670.4;Solyc06g034290.3;Solyc06g075460.4;Solyc07g049310.3;Solyc07g063930.4;Solyc09g008370.1;Solyc09g008550.4;Solyc09g089860.4;Solyc10g084940.3;Solyc10g084950.3;Solyc11g008200.2;Solyc11g010690.3;Solyc12g010440.3;Solyc12g…
GO:0003746	translation elongation factor activity	3	3/1315	31/18268	1.34	0.387999	0.670045	Solyc06g009960.3/Solyc06g009970.3/Solyc11g069700.2	Solyc06g009960.3;Solyc06g009970.3;Solyc11g069700.2
GO:0042802	identical protein binding	7	7/1315	83/18268	1.17	0.389359	0.670045	Solyc01g060070.3/Solyc01g107250.3/Solyc03g083210.3/Solyc03g095780.3/Solyc03g118540.4/Solyc08g081840.3/Solyc10g076410.1	Solyc01g060070.3;Solyc01g107250.3;Solyc03g083210.3;Solyc03g095780.3;Solyc03g118540.4;Solyc08g081840.3;Solyc10g076410.1
GO:0016798	hydrolase activity, acting on glycosyl bonds	2	2/1315	19/18268	1.46	0.401759	0.670045	Solyc01g095670.4/Solyc12g013750.2	Solyc01g095670.4;Solyc12g013750.2
GO:0003777	microtubule motor activity	6	6/1315	71/18268	1.17	0.404155	0.670045	Solyc01g066820.4/Solyc02g062330.3/Solyc02g084390.3/Solyc03g005620.4/Solyc03g119220.3/Solyc07g065210.4	Solyc01g066820.4;Solyc02g062330.3;Solyc02g084390.3;Solyc03g005620.4;Solyc03g119220.3;Solyc07g065210.4
GO:0000250	lanosterol synthase activity	1	1/1315	7/18268	1.98	0.407279	0.670045	Solyc04g070980.4	Solyc04g070980.4
GO:0003857	3-hydroxyacyl-CoA dehydrogenase activity	1	1/1315	7/18268	1.98	0.407279	0.670045	Solyc12g007170.3	Solyc12g007170.3
GO:0004373	glycogen (starch) synthase activity	1	1/1315	7/18268	1.98	0.407279	0.670045	Solyc02g088000.3	Solyc02g088000.3
GO:0004471	malate dehydrogenase (decarboxylating) (NAD+) activity	1	1/1315	7/18268	1.98	0.407279	0.670045	Solyc05g050120.3	Solyc05g050120.3
GO:0004602	glutathione peroxidase activity	1	1/1315	7/18268	1.98	0.407279	0.670045	Solyc08g080940.3	Solyc08g080940.3
GO:0004824	lysine-tRNA ligase activity	1	1/1315	7/18268	1.98	0.407279	0.670045	Solyc01g005540.4	Solyc01g005540.4
GO:0005267	potassium channel activity	1	1/1315	7/18268	1.98	0.407279	0.670045	Solyc07g065450.3	Solyc07g065450.3
GO:0015292	uniporter activity	1	1/1315	7/18268	1.98	0.407279	0.670045	Solyc02g065550.4	Solyc02g065550.4
GO:0016841	ammonia-lyase activity	1	1/1315	7/18268	1.98	0.407279	0.670045	Solyc09g007910.4	Solyc09g007910.4
GO:0042132	fructose 1,6-bisphosphate 1-phosphatase activity	1	1/1315	7/18268	1.98	0.407279	0.670045	Solyc10g086730.2	Solyc10g086730.2
GO:0042300	beta-amyrin synthase activity	1	1/1315	7/18268	1.98	0.407279	0.670045	Solyc04g070980.4	Solyc04g070980.4
GO:0045544	gibberellin 20-oxidase activity	1	1/1315	7/18268	1.98	0.407279	0.670045	Solyc03g006880.3	Solyc03g006880.3
GO:0047617	acyl-CoA hydrolase activity	1	1/1315	7/18268	1.98	0.407279	0.670045	Solyc01g094530.4	Solyc01g094530.4
GO:0070008	serine-type exopeptidase activity	1	1/1315	7/18268	1.98	0.407279	0.670045	Solyc04g082120.3	Solyc04g082120.3
GO:0008289	lipid binding	15	15/1315	192/18268	1.09	0.409668	0.671751	Solyc02g062670.3/Solyc03g095780.3/Solyc03g118200.4/Solyc06g072110.4/Solyc06g075130.4/Solyc06g084190.3/Solyc08g067530.1/Solyc08g082180.3/Solyc09g007860.4/Solyc10g075090.3/Solyc10g075103.1/Solyc10g075110.2/Solyc10g076410.1/Solyc12g011420.2/Solyc12g035420.3	Solyc02g062670.3;Solyc03g095780.3;Solyc03g118200.4;Solyc06g072110.4;Solyc06g075130.4;Solyc06g084190.3;Solyc08g067530.1;Solyc08g082180.3;Solyc09g007860.4;Solyc10g075090.3;Solyc10g075103.1;Solyc10g075110.2;Solyc10g076410.1;Solyc12g011420.2;Solyc12g035420.3
GO:0003824	catalytic activity	80	80/1315	1082/18268	1.03	0.416716	0.68106	Solyc01g005400.3/Solyc01g007267.1/Solyc01g088490.3/Solyc01g091330.4/Solyc01g095670.4/Solyc01g099100.4/Solyc01g102730.3/Solyc01g107250.3/Solyc01g108775.1/Solyc01g150144.1/Solyc02g021100.3/Solyc02g069500.1/Solyc02g072010.3/Solyc02g081360.4/Solyc02g085650.4/Solyc03g031420.1/Solyc03g044720.2/Solyc03g058970.4/Solyc03g098300.1/Solyc03g098460.3/Solyc03g113750.3/Solyc03g113880.4/Solyc03g116480.1/Solyc03g…	Solyc01g005400.3;Solyc01g007267.1;Solyc01g088490.3;Solyc01g091330.4;Solyc01g095670.4;Solyc01g099100.4;Solyc01g102730.3;Solyc01g107250.3;Solyc01g108775.1;Solyc01g150144.1;Solyc02g021100.3;Solyc02g069500.1;Solyc02g072010.3;Solyc02g081360.4;Solyc02g085650.4;Solyc03g031420.1;Solyc03g044720.2;Solyc03g058970.4;Solyc03g098300.1;Solyc03g098460.3;Solyc03g113750.3;Solyc03g113880.4;Solyc03g116480.1;Solyc03g…
GO:0046983	protein dimerization activity	37	37/1315	493/18268	1.04	0.420034	0.684231	Solanum_lycopersicum_newGene_3115/Solyc01g060070.3/Solyc01g066730.4/Solyc01g096370.4/Solyc01g102300.3/Solyc02g062690.3/Solyc02g071730.4/Solyc03g006910.3/Solyc03g034000.3/Solyc03g083210.3/Solyc03g095780.3/Solyc03g095980.3/Solyc03g120520.2/Solyc04g005660.4/Solyc04g076845.1/Solyc04g078790.3/Solyc04g081350.3/Solyc06g050840.3/Solyc06g062460.3/Solyc06g074010.3/Solyc07g052700.3/Solyc07g052720.4/Solyc07g…	--;Solyc01g060070.3;Solyc01g066730.4;Solyc01g096370.4;Solyc01g102300.3;Solyc02g062690.3;Solyc02g071730.4;Solyc03g006910.3;Solyc03g034000.3;Solyc03g083210.3;Solyc03g095780.3;Solyc03g095980.3;Solyc03g120520.2;Solyc04g005660.4;Solyc04g076845.1;Solyc04g078790.3;Solyc04g081350.3;Solyc06g050840.3;Solyc06g062460.3;Solyc06g074010.3;Solyc07g052700.3;Solyc07g052720.4;Solyc07g055670.1;Solyc08g081840.3;Solyc…
GO:0003860	3-hydroxyisobutyryl-CoA hydrolase activity	2	2/1315	20/18268	1.39	0.427433	0.689742	Solyc01g090697.1/Solyc10g085630.3	Solyc01g090697.1;Solyc10g085630.3
GO:0008970	phosphatidylcholine 1-acylhydrolase activity	2	2/1315	20/18268	1.39	0.427433	0.689742	Solyc02g077430.4/Solyc12g010910.2	Solyc02g077430.4;Solyc12g010910.2
GO:0003993	acid phosphatase activity	3	3/1315	33/18268	1.26	0.427582	0.689742	Solyc04g005450.3/Solyc06g062390.3/Solyc07g008545.1	Solyc04g005450.3;Solyc06g062390.3;Solyc07g008545.1
GO:0003854	3-beta-hydroxy-delta5-steroid dehydrogenase activity	1	1/1315	8/18268	1.74	0.449962	0.692136	Solyc01g094070.3	Solyc01g094070.3
GO:0004017	adenylate kinase activity	1	1/1315	8/18268	1.74	0.449962	0.692136	Solyc06g075310.4	Solyc06g075310.4
GO:0004124	cysteine synthase activity	1	1/1315	8/18268	1.74	0.449962	0.692136	Solyc01g094790.3	Solyc01g094790.3
GO:0004143	diacylglycerol kinase activity	1	1/1315	8/18268	1.74	0.449962	0.692136	Solyc10g008640.3	Solyc10g008640.3
GO:0004435	phosphatidylinositol phospholipase C activity	1	1/1315	8/18268	1.74	0.449962	0.692136	Solyc06g007120.3	Solyc06g007120.3
GO:0004535	poly(A)-specific ribonuclease activity	1	1/1315	8/18268	1.74	0.449962	0.692136	Solyc01g007840.3	Solyc01g007840.3
GO:0004550	nucleoside diphosphate kinase activity	1	1/1315	8/18268	1.74	0.449962	0.692136	Solyc01g089970.3	Solyc01g089970.3
GO:0004749	ribose phosphate diphosphokinase activity	1	1/1315	8/18268	1.74	0.449962	0.692136	Solyc10g007760.4	Solyc10g007760.4
GO:0008131	primary amine oxidase activity	1	1/1315	8/18268	1.74	0.449962	0.692136	Solyc05g013440.3	Solyc05g013440.3
GO:0008725	DNA-3-methyladenine glycosylase activity	1	1/1315	8/18268	1.74	0.449962	0.692136	Solyc10g005210.4	Solyc10g005210.4
GO:0016161	beta-amylase activity	1	1/1315	8/18268	1.74	0.449962	0.692136	Solyc08g077530.3	Solyc08g077530.3
GO:0016799	hydrolase activity, hydrolyzing N-glycosyl compounds	1	1/1315	8/18268	1.74	0.449962	0.692136	Solyc10g082020.2	Solyc10g082020.2
GO:0031386	protein tag	1	1/1315	8/18268	1.74	0.449962	0.692136	Solyc08g083120.3	Solyc08g083120.3
GO:0070006	metalloaminopeptidase activity	1	1/1315	8/18268	1.74	0.449962	0.692136	Solyc02g085640.4	Solyc02g085640.4
GO:0102229	amylopectin maltohydrolase activity	1	1/1315	8/18268	1.74	0.449962	0.692136	Solyc08g077530.3	Solyc08g077530.3
GO:0008017	microtubule binding	9	9/1315	117/18268	1.07	0.468478	0.71731	Solyc01g044556.1/Solyc01g066820.4/Solyc02g062330.3/Solyc02g084390.3/Solyc03g005620.4/Solyc03g116370.3/Solyc03g119220.3/Solyc07g065210.4/Solyc12g014130.2	Solyc01g044556.1;Solyc01g066820.4;Solyc02g062330.3;Solyc02g084390.3;Solyc03g005620.4;Solyc03g116370.3;Solyc03g119220.3;Solyc07g065210.4;Solyc12g014130.2
GO:0061630	ubiquitin protein ligase activity	6	6/1315	76/18268	1.1	0.469215	0.71731	Solyc05g007895.1/Solyc05g008640.1/Solyc06g073890.3/Solyc07g045190.3/Solyc10g007000.3/Solyc12g005950.2	Solyc05g007895.1;Solyc05g008640.1;Solyc06g073890.3;Solyc07g045190.3;Solyc10g007000.3;Solyc12g005950.2
GO:0008483	transaminase activity	2	2/1315	22/18268	1.26	0.476953	0.726903	Solyc07g043310.3/Solyc08g080370.3	Solyc07g043310.3;Solyc08g080370.3
GO:0005509	calcium ion binding	19	19/1315	256/18268	1.03	0.47945	0.728474	Solyc01g097510.4/Solyc01g105650.4/Solyc02g088090.1/Solyc03g006710.1/Solyc03g115930.3/Solyc04g006930.3/Solyc06g018050.4/Solyc06g083000.1/Solyc07g053050.1/Solyc07g063690.1/Solyc08g066790.4/Solyc10g006660.3/Solyc10g006700.1/Solyc10g008630.3/Solyc10g074980.2/Solyc11g006370.2/Solyc12g009630.3/Solyc12g014110.2/Solyc12g094720.3	Solyc01g097510.4;Solyc01g105650.4;Solyc02g088090.1;Solyc03g006710.1;Solyc03g115930.3;Solyc04g006930.3;Solyc06g018050.4;Solyc06g083000.1;Solyc07g053050.1;Solyc07g063690.1;Solyc08g066790.4;Solyc10g006660.3;Solyc10g006700.1;Solyc10g008630.3;Solyc10g074980.2;Solyc11g006370.2;Solyc12g009630.3;Solyc12g014110.2;Solyc12g094720.3
GO:0005543	phospholipid binding	3	3/1315	36/18268	1.16	0.485098	0.730452	Solyc02g062670.3/Solyc03g118200.4/Solyc12g035420.3	Solyc02g062670.3;Solyc03g118200.4;Solyc12g035420.3
GO:0008061	chitin binding	3	3/1315	36/18268	1.16	0.485098	0.730452	Solyc01g095670.4/Solyc06g053380.3/Solyc07g005090.4	Solyc01g095670.4;Solyc06g053380.3;Solyc07g005090.4
GO:0005337	nucleoside transmembrane transporter activity	1	1/1315	9/18268	1.54	0.489573	0.730452	Solyc01g008020.4	Solyc01g008020.4
GO:0005375	copper ion transmembrane transporter activity	1	1/1315	9/18268	1.54	0.489573	0.730452	Solyc02g082080.1	Solyc02g082080.1
GO:0015250	water channel activity	1	1/1315	9/18268	1.54	0.489573	0.730452	Solyc06g011350.3	Solyc06g011350.3
GO:0019829	cation-transporting ATPase activity	1	1/1315	9/18268	1.54	0.489573	0.730452	Solyc01g105160.4	Solyc01g105160.4
GO:0019787	ubiquitin-like protein transferase activity	9	9/1315	120/18268	1.04	0.499305	0.742742	Solyc03g116480.1/Solyc05g007895.1/Solyc05g008640.1/Solyc06g073890.3/Solyc07g045190.3/Solyc08g042100.3/Solyc08g077100.3/Solyc09g065870.4/Solyc10g007000.3	Solyc03g116480.1;Solyc05g007895.1;Solyc05g008640.1;Solyc06g073890.3;Solyc07g045190.3;Solyc08g042100.3;Solyc08g077100.3;Solyc09g065870.4;Solyc10g007000.3
GO:0005347	ATP transmembrane transporter activity	3	3/1315	37/18268	1.13	0.50365	0.746969	Solyc03g123990.3/Solyc06g069410.3/Solyc12g096030.1	Solyc03g123990.3;Solyc06g069410.3;Solyc12g096030.1
GO:0003779	actin binding	5	5/1315	65/18268	1.07	0.506407	0.748823	Solyc02g094320.3/Solyc06g008090.3/Solyc08g077680.3/Solyc09g090550.3/Solyc12g098430.2	Solyc02g094320.3;Solyc06g008090.3;Solyc08g077680.3;Solyc09g090550.3;Solyc12g098430.2
GO:0017137	Rab GTPase binding	2	2/1315	24/18268	1.16	0.523767	0.75145	Solyc02g082690.3/Solyc07g049580.3	Solyc02g082690.3;Solyc07g049580.3
GO:0003727	single-stranded RNA binding	1	1/1315	10/18268	1.39	0.526334	0.75145	Solyc09g048970.3	Solyc09g048970.3
GO:0004096	catalase activity	1	1/1315	10/18268	1.39	0.526334	0.75145	Solyc04g054980.3	Solyc04g054980.3
GO:0004888	transmembrane signaling receptor activity	1	1/1315	10/18268	1.39	0.526334	0.75145	Solyc01g107250.3	Solyc01g107250.3
GO:0015075	ion transmembrane transporter activity	1	1/1315	10/18268	1.39	0.526334	0.75145	Solyc01g060070.3	Solyc01g060070.3
GO:0015318	inorganic solute uptake transmembrane transporter activity	1	1/1315	10/18268	1.39	0.526334	0.75145	Solyc01g060070.3	Solyc01g060070.3
GO:0016879	ligase activity, forming carbon-nitrogen bonds	1	1/1315	10/18268	1.39	0.526334	0.75145	Solyc07g063850.3	Solyc07g063850.3
GO:0019139	cytokinin dehydrogenase activity	1	1/1315	10/18268	1.39	0.526334	0.75145	Solyc04g080820.2	Solyc04g080820.2
GO:0030060	L-malate dehydrogenase activity	1	1/1315	10/18268	1.39	0.526334	0.75145	Solyc09g090140.4	Solyc09g090140.4
GO:0030515	snoRNA binding	1	1/1315	10/18268	1.39	0.526334	0.75145	Solyc09g066500.4	Solyc09g066500.4
GO:0043023	ribosomal large subunit binding	1	1/1315	10/18268	1.39	0.526334	0.75145	Solyc07g066430.3	Solyc07g066430.3
GO:0050897	cobalt ion binding	1	1/1315	10/18268	1.39	0.526334	0.75145	Solyc01g008930.4	Solyc01g008930.4
GO:0045330	aspartyl esterase activity	6	6/1315	81/18268	1.03	0.532176	0.757615	Solyc01g098930.3/Solyc02g075620.4/Solyc02g080220.3/Solyc06g034360.2/Solyc07g043240.4/Solyc08g078640.3	Solyc01g098930.3;Solyc02g075620.4;Solyc02g080220.3;Solyc06g034360.2;Solyc07g043240.4;Solyc08g078640.3
GO:0030599	pectinesterase activity	6	6/1315	82/18268	1.02	0.544401	0.760805	Solyc01g098930.3/Solyc02g075620.4/Solyc02g080220.3/Solyc06g034360.2/Solyc07g043240.4/Solyc08g078640.3	Solyc01g098930.3;Solyc02g075620.4;Solyc02g080220.3;Solyc06g034360.2;Solyc07g043240.4;Solyc08g078640.3
GO:0015631	tubulin binding	2	2/1315	25/18268	1.11	0.546092	0.760805	Solyc01g044556.1/Solyc12g014130.2	Solyc01g044556.1;Solyc12g014130.2
GO:0032553	ribonucleotide binding	2	2/1315	25/18268	1.11	0.546092	0.760805	Solyc01g100370.3/Solyc12g035420.3	Solyc01g100370.3;Solyc12g035420.3
GO:0032555	purine ribonucleotide binding	2	2/1315	25/18268	1.11	0.546092	0.760805	Solyc01g100370.3/Solyc12g035420.3	Solyc01g100370.3;Solyc12g035420.3
GO:0005516	calmodulin binding	5	5/1315	68/18268	1.02	0.547165	0.760805	Solyc03g113950.4/Solyc04g017750.4/Solyc08g069020.1/Solyc11g069220.2/Solyc12g036390.2	Solyc03g113950.4;Solyc04g017750.4;Solyc08g069020.1;Solyc11g069220.2;Solyc12g036390.2
GO:0031625	ubiquitin protein ligase binding	5	5/1315	68/18268	1.02	0.547165	0.760805	Solyc02g093910.3/Solyc03g120320.1/Solyc08g083120.3/Solyc09g011030.3/Solyc10g007000.3	Solyc02g093910.3;Solyc03g120320.1;Solyc08g083120.3;Solyc09g011030.3;Solyc10g007000.3
GO:0036094	small molecule binding	5	5/1315	68/18268	1.02	0.547165	0.760805	Solyc01g100370.3/Solyc03g095780.3/Solyc08g082180.3/Solyc10g076410.1/Solyc12g035420.3	Solyc01g100370.3;Solyc03g095780.3;Solyc08g082180.3;Solyc10g076410.1;Solyc12g035420.3
GO:0042803	protein homodimerization activity	5	5/1315	68/18268	1.02	0.547165	0.760805	Solyc01g060070.3/Solyc03g083210.3/Solyc03g095780.3/Solyc08g081840.3/Solyc10g076410.1	Solyc01g060070.3;Solyc03g083210.3;Solyc03g095780.3;Solyc08g081840.3;Solyc10g076410.1
GO:0030247	polysaccharide binding	4	4/1315	54/18268	1.03	0.551094	0.760805	Solyc02g081480.4/Solyc03g083480.4/Solyc08g082310.3/Solyc09g008640.1	Solyc02g081480.4;Solyc03g083480.4;Solyc08g082310.3;Solyc09g008640.1
GO:0003843	1,3-beta-D-glucan synthase activity	1	1/1315	11/18268	1.26	0.560449	0.760805	Solyc02g078230.2	Solyc02g078230.2
GO:0016624	oxidoreductase activity, acting on the aldehyde or oxo group of donors, disulfide as acceptor	1	1/1315	11/18268	1.26	0.560449	0.760805	Solyc05g056480.3	Solyc05g056480.3
GO:0016881	acid-amino acid ligase activity	1	1/1315	11/18268	1.26	0.560449	0.760805	Solyc07g063850.3	Solyc07g063850.3
GO:0038199	ethylene receptor activity	1	1/1315	11/18268	1.26	0.560449	0.760805	Solyc06g053710.3	Solyc06g053710.3
GO:0050664	oxidoreductase activity, acting on NAD(P)H, oxygen as acceptor	1	1/1315	11/18268	1.26	0.560449	0.760805	Solyc10g052510.2	Solyc10g052510.2
GO:0080019	fatty-acyl-CoA reductase (alcohol-forming) activity	1	1/1315	11/18268	1.26	0.560449	0.760805	Solyc06g074410.4	Solyc06g074410.4
GO:0080030	methyl indole-3-acetate esterase activity	1	1/1315	11/18268	1.26	0.560449	0.760805	Solyc01g108780.4	Solyc01g108780.4
GO:0080031	methyl salicylate esterase activity	1	1/1315	11/18268	1.26	0.560449	0.760805	Solyc01g108780.4	Solyc01g108780.4
GO:0015079	potassium ion transmembrane transporter activity	2	2/1315	26/18268	1.07	0.567673	0.764346	Solyc04g025990.3/Solyc05g005720.4	Solyc04g025990.3;Solyc05g005720.4
GO:0017016	Ras GTPase binding	2	2/1315	26/18268	1.07	0.567673	0.764346	Solyc02g082690.3/Solyc07g049580.3	Solyc02g082690.3;Solyc07g049580.3
GO:0031267	small GTPase binding	2	2/1315	26/18268	1.07	0.567673	0.764346	Solyc02g082690.3/Solyc07g049580.3	Solyc02g082690.3;Solyc07g049580.3
GO:0019706	protein-cysteine S-palmitoyltransferase activity	2	2/1315	27/18268	1.03	0.588501	0.786589	Solyc05g055630.3/Solyc10g086565.2	Solyc05g055630.3;Solyc10g086565.2
GO:0061631	ubiquitin conjugating enzyme activity	2	2/1315	27/18268	1.03	0.588501	0.786589	Solyc11g065190.3/Solyc12g099310.2	Solyc11g065190.3;Solyc12g099310.2
GO:0004523	RNA-DNA hybrid ribonuclease activity	3	3/1315	42/18268	0.99	0.590782	0.786589	Solanum_lycopersicum_newGene_3021/Solanum_lycopersicum_newGene_677/Solyc04g076610.3	--;--;Solyc04g076610.3
GO:0005262	calcium channel activity	1	1/1315	12/18268	1.16	0.592108	0.786589	Solyc02g065550.4	Solyc02g065550.4
GO:0080032	methyl jasmonate esterase activity	1	1/1315	12/18268	1.16	0.592108	0.786589	Solyc01g108780.4	Solyc01g108780.4
GO:0004364	glutathione transferase activity	4	4/1315	57/18268	0.97	0.594585	0.787773	Solyc07g056490.4/Solyc08g080900.3/Solyc09g011590.4/Solyc09g011650.4	Solyc07g056490.4;Solyc08g080900.3;Solyc09g011590.4;Solyc09g011650.4
GO:0043168	anion binding	7	7/1315	102/18268	0.95	0.607581	0.80203	Solyc01g100370.3/Solyc02g062670.3/Solyc03g095780.3/Solyc03g118200.4/Solyc08g082180.3/Solyc10g076410.1/Solyc12g035420.3	Solyc01g100370.3;Solyc02g062670.3;Solyc03g095780.3;Solyc03g118200.4;Solyc08g082180.3;Solyc10g076410.1;Solyc12g035420.3
GO:0051020	GTPase binding	2	2/1315	28/18268	0.99	0.608574	0.80203	Solyc02g082690.3/Solyc07g049580.3	Solyc02g082690.3;Solyc07g049580.3
GO:0000287	magnesium ion binding	12	12/1315	176/18268	0.95	0.619966	0.806219	Solyc01g096930.3/Solyc01g097970.4/Solyc02g150124.1/Solyc03g006550.4/Solyc04g008740.3/Solyc07g063040.3/Solyc08g005130.1/Solyc08g015630.3/Solyc09g008840.4/Solyc09g010380.3/Solyc10g007760.4/Solyc12g006570.2	Solyc01g096930.3;Solyc01g097970.4;Solyc02g150124.1;Solyc03g006550.4;Solyc04g008740.3;Solyc07g063040.3;Solyc08g005130.1;Solyc08g015630.3;Solyc09g008840.4;Solyc09g010380.3;Solyc10g007760.4;Solyc12g006570.2
GO:0004518	nuclease activity	22	22/1315	320/18268	0.96	0.620859	0.806219	Solyc01g007267.1/Solyc01g088490.3/Solyc02g069500.1/Solyc02g072010.3/Solyc02g085650.4/Solyc03g113750.3/Solyc03g116540.1/Solyc04g010050.4/Solyc04g010060.2/Solyc04g064660.1/Solyc04g079150.1/Solyc05g006460.3/Solyc05g008330.3/Solyc05g012140.3/Solyc06g009800.3/Solyc06g069700.4/Solyc08g023490.4/Solyc08g078570.3/Solyc08g079640.3/Solyc09g005710.3/Solyc10g007520.3/Solyc11g012570.3	Solyc01g007267.1;Solyc01g088490.3;Solyc02g069500.1;Solyc02g072010.3;Solyc02g085650.4;Solyc03g113750.3;Solyc03g116540.1;Solyc04g010050.4;Solyc04g010060.2;Solyc04g064660.1;Solyc04g079150.1;Solyc05g006460.3;Solyc05g008330.3;Solyc05g012140.3;Solyc06g009800.3;Solyc06g069700.4;Solyc08g023490.4;Solyc08g078570.3;Solyc08g079640.3;Solyc09g005710.3;Solyc10g007520.3;Solyc11g012570.3
GO:0004089	carbonate dehydratase activity	1	1/1315	13/18268	1.07	0.621489	0.806219	Solyc11g069650.2	Solyc11g069650.2
GO:0005351	sugar:proton symporter activity	1	1/1315	13/18268	1.07	0.621489	0.806219	Solyc07g006970.4	Solyc07g006970.4
GO:0015171	amino acid transmembrane transporter activity	1	1/1315	13/18268	1.07	0.621489	0.806219	Solyc01g060070.3	Solyc01g060070.3
GO:0016157	sucrose synthase activity	1	1/1315	13/18268	1.07	0.621489	0.806219	Solyc07g042550.3	Solyc07g042550.3
GO:0016746	transferase activity, transferring acyl groups	3	3/1315	45/18268	0.93	0.638068	0.82557	Solyc03g119980.3/Solyc04g079880.4/Solyc07g032170.3	Solyc03g119980.3;Solyc04g079880.4;Solyc07g032170.3
GO:0019888	protein phosphatase regulator activity	2	2/1315	30/18268	0.93	0.646459	0.828609	Solyc03g095780.3/Solyc10g076410.1	Solyc03g095780.3;Solyc10g076410.1
GO:0005089	Rho guanyl-nucleotide exchange factor activity	1	1/1315	14/18268	0.99	0.648755	0.828609	Solyc12g044270.2	Solyc12g044270.2
GO:0016307	phosphatidylinositol phosphate kinase activity	1	1/1315	14/18268	0.99	0.648755	0.828609	Solyc07g017510.3	Solyc07g017510.3
GO:0016671	oxidoreductase activity, acting on a sulfur group of donors, disulfide as acceptor	1	1/1315	14/18268	0.99	0.648755	0.828609	Solyc12g019740.2	Solyc12g019740.2
GO:0016844	strictosidine synthase activity	1	1/1315	14/18268	0.99	0.648755	0.828609	Solyc03g114560.2	Solyc03g114560.2
GO:0003697	single-stranded DNA binding	2	2/1315	31/18268	0.9	0.664284	0.846267	Solyc02g093300.3/Solyc09g048970.3	Solyc02g093300.3;Solyc09g048970.3
GO:0043531	ADP binding	19	19/1315	285/18268	0.93	0.670015	0.851385	Solanum_lycopersicum_newGene_2721/Solyc01g008800.3/Solyc01g102880.3/Solyc02g070380.1/Solyc02g090380.4/Solyc04g005540.3/Solyc04g009130.4/Solyc04g009250.1/Solyc04g009260.3/Solyc04g009660.2/Solyc05g009630.4/Solyc07g049700.1/Solyc08g076000.4/Solyc11g010160.1/Solyc11g069670.2/Solyc11g069990.2/Solyc12g005970.1/Solyc12g006040.3/Solyc12g097020.2	--;Solyc01g008800.3;Solyc01g102880.3;Solyc02g070380.1;Solyc02g090380.4;Solyc04g005540.3;Solyc04g009130.4;Solyc04g009250.1;Solyc04g009260.3;Solyc04g009660.2;Solyc05g009630.4;Solyc07g049700.1;Solyc08g076000.4;Solyc11g010160.1;Solyc11g069670.2;Solyc11g069990.2;Solyc12g005970.1;Solyc12g006040.3;Solyc12g097020.2
GO:0000978	RNA polymerase II core promoter proximal region sequence-specific DNA binding	1	1/1315	15/18268	0.93	0.674059	0.852164	Solyc06g074120.3	Solyc06g074120.3
GO:0016627	oxidoreductase activity, acting on the CH-CH group of donors	1	1/1315	15/18268	0.93	0.674059	0.852164	Solyc03g044720.2	Solyc03g044720.2
GO:0030246	carbohydrate binding	9	9/1315	139/18268	0.9	0.677151	0.853901	Solyc02g069060.4/Solyc02g087780.3/Solyc03g094020.3/Solyc04g014410.4/Solyc04g076630.3/Solyc04g076640.3/Solyc04g076660.3/Solyc08g080360.3/Solyc09g092160.2	Solyc02g069060.4;Solyc02g087780.3;Solyc03g094020.3;Solyc04g014410.4;Solyc04g076630.3;Solyc04g076640.3;Solyc04g076660.3;Solyc08g080360.3;Solyc09g092160.2
GO:0030695	GTPase regulator activity	2	2/1315	32/18268	0.87	0.681377	0.857055	Solyc02g082690.3/Solyc07g049580.3	Solyc02g082690.3;Solyc07g049580.3
GO:0016491	oxidoreductase activity	39	39/1315	578/18268	0.94	0.688502	0.86383	Solyc01g067620.3/Solyc01g081510.4/Solyc01g088400.4/Solyc01g088430.4/Solyc01g091320.3/Solyc01g105650.4/Solyc01g105660.4/Solyc02g030480.4/Solyc02g063240.4/Solyc02g070580.1/Solyc02g081390.3/Solyc03g044720.2/Solyc03g096660.2/Solyc03g098460.3/Solyc03g116280.3/Solyc04g007980.3/Solyc04g009850.4/Solyc06g034120.4/Solyc06g072160.3/Solyc07g049530.3/Solyc07g052230.3/Solyc07g054930.3/Solyc07g063450.3/Solyc08g…	Solyc01g067620.3;Solyc01g081510.4;Solyc01g088400.4;Solyc01g088430.4;Solyc01g091320.3;Solyc01g105650.4;Solyc01g105660.4;Solyc02g030480.4;Solyc02g063240.4;Solyc02g070580.1;Solyc02g081390.3;Solyc03g044720.2;Solyc03g096660.2;Solyc03g098460.3;Solyc03g116280.3;Solyc04g007980.3;Solyc04g009850.4;Solyc06g034120.4;Solyc06g072160.3;Solyc07g049530.3;Solyc07g052230.3;Solyc07g054930.3;Solyc07g063450.3;Solyc08g…
GO:0004185	serine-type carboxypeptidase activity	4	4/1315	65/18268	0.85	0.697406	0.86859	Solyc01g010710.4/Solyc04g077670.3/Solyc04g079330.2/Solyc06g074850.3	Solyc01g010710.4;Solyc04g077670.3;Solyc04g079330.2;Solyc06g074850.3
GO:0004402	histone acetyltransferase activity	1	1/1315	16/18268	0.87	0.69754	0.86859	Solyc03g111710.3	Solyc03g111710.3
GO:0008271	secondary active sulfate transmembrane transporter activity	1	1/1315	16/18268	0.87	0.69754	0.86859	Solyc04g072760.3	Solyc04g072760.3
GO:0071949	FAD binding	5	5/1315	81/18268	0.86	0.70189	0.871821	Solyc02g063180.4/Solyc04g080820.2/Solyc08g078390.4/Solyc09g072660.4/Solyc12g089385.1	Solyc02g063180.4;Solyc04g080820.2;Solyc08g078390.4;Solyc09g072660.4;Solyc12g089385.1
GO:0060589	nucleoside-triphosphatase regulator activity	2	2/1315	34/18268	0.82	0.713421	0.883934	Solyc02g082690.3/Solyc07g049580.3	Solyc02g082690.3;Solyc07g049580.3
GO:0004803	transposase activity	1	1/1315	17/18268	0.82	0.719332	0.884639	Solyc07g026705.1	Solyc07g026705.1
GO:0016667	oxidoreductase activity, acting on a sulfur group of donors	1	1/1315	17/18268	0.82	0.719332	0.884639	Solyc12g019740.2	Solyc12g019740.2
GO:0031593	polyubiquitin modification-dependent protein binding	1	1/1315	17/18268	0.82	0.719332	0.884639	Solyc04g007120.4	Solyc04g007120.4
GO:0008144	drug binding	2	2/1315	35/18268	0.79	0.728403	0.893583	Solyc01g095670.4/Solyc01g100370.3	Solyc01g095670.4;Solyc01g100370.3
GO:1901363	heterocyclic compound binding	34	34/1315	518/18268	0.91	0.738836	0.900384	Solyc01g007267.1/Solyc01g088490.3/Solyc01g100370.3/Solyc02g069500.1/Solyc02g072010.3/Solyc02g085650.4/Solyc02g092570.1/Solyc03g113750.3/Solyc03g116540.1/Solyc03g123400.1/Solyc04g010050.4/Solyc04g010060.2/Solyc04g016380.3/Solyc04g064660.1/Solyc04g079150.1/Solyc05g006460.3/Solyc05g008330.3/Solyc05g009170.3/Solyc05g012140.3/Solyc06g009800.3/Solyc06g069700.4/Solyc07g043330.3/Solyc07g047950.1/Solyc08g…	Solyc01g007267.1;Solyc01g088490.3;Solyc01g100370.3;Solyc02g069500.1;Solyc02g072010.3;Solyc02g085650.4;Solyc02g092570.1;Solyc03g113750.3;Solyc03g116540.1;Solyc03g123400.1;Solyc04g010050.4;Solyc04g010060.2;Solyc04g016380.3;Solyc04g064660.1;Solyc04g079150.1;Solyc05g006460.3;Solyc05g008330.3;Solyc05g009170.3;Solyc05g012140.3;Solyc06g009800.3;Solyc06g069700.4;Solyc07g043330.3;Solyc07g047950.1;Solyc08g…
GO:0032549	ribonucleoside binding	1	1/1315	18/18268	0.77	0.739554	0.900384	Solyc12g035420.3	Solyc12g035420.3
GO:0043167	ion binding	8	8/1315	132/18268	0.84	0.74216	0.900384	Solyc01g100370.3/Solyc02g062670.3/Solyc03g095780.3/Solyc03g118200.4/Solyc08g082180.3/Solyc10g076410.1/Solyc12g009630.3/Solyc12g035420.3	Solyc01g100370.3;Solyc02g062670.3;Solyc03g095780.3;Solyc03g118200.4;Solyc08g082180.3;Solyc10g076410.1;Solyc12g009630.3;Solyc12g035420.3
GO:0097159	organic cyclic compound binding	34	34/1315	519/18268	0.91	0.742781	0.900384	Solyc01g007267.1/Solyc01g088490.3/Solyc01g100370.3/Solyc02g069500.1/Solyc02g072010.3/Solyc02g085650.4/Solyc02g092570.1/Solyc03g113750.3/Solyc03g116540.1/Solyc03g123400.1/Solyc04g010050.4/Solyc04g010060.2/Solyc04g016380.3/Solyc04g064660.1/Solyc04g079150.1/Solyc05g006460.3/Solyc05g008330.3/Solyc05g009170.3/Solyc05g012140.3/Solyc06g009800.3/Solyc06g069700.4/Solyc07g043330.3/Solyc07g047950.1/Solyc08g…	Solyc01g007267.1;Solyc01g088490.3;Solyc01g100370.3;Solyc02g069500.1;Solyc02g072010.3;Solyc02g085650.4;Solyc02g092570.1;Solyc03g113750.3;Solyc03g116540.1;Solyc03g123400.1;Solyc04g010050.4;Solyc04g010060.2;Solyc04g016380.3;Solyc04g064660.1;Solyc04g079150.1;Solyc05g006460.3;Solyc05g008330.3;Solyc05g009170.3;Solyc05g012140.3;Solyc06g009800.3;Solyc06g069700.4;Solyc07g043330.3;Solyc07g047950.1;Solyc08g…
GO:0051539	4 iron, 4 sulfur cluster binding	3	3/1315	53/18268	0.79	0.744782	0.900384	Solyc01g088380.3/Solyc02g093300.3/Solyc09g083007.1	Solyc01g088380.3;Solyc02g093300.3;Solyc09g083007.1
GO:0005488	binding	61	61/1315	911/18268	0.93	0.74482	0.900384	Solyc01g007267.1/Solyc01g044556.1/Solyc01g060070.3/Solyc01g088490.3/Solyc01g095670.4/Solyc01g100370.3/Solyc01g107250.3/Solyc02g062670.3/Solyc02g069060.4/Solyc02g069500.1/Solyc02g072010.3/Solyc02g080610.4/Solyc02g082690.3/Solyc02g085650.4/Solyc02g092570.1/Solyc02g093910.3/Solyc03g043770.4/Solyc03g083210.3/Solyc03g095780.3/Solyc03g113750.3/Solyc03g116480.1/Solyc03g116540.1/Solyc03g118200.4/Solyc03g…	Solyc01g007267.1;Solyc01g044556.1;Solyc01g060070.3;Solyc01g088490.3;Solyc01g095670.4;Solyc01g100370.3;Solyc01g107250.3;Solyc02g062670.3;Solyc02g069060.4;Solyc02g069500.1;Solyc02g072010.3;Solyc02g080610.4;Solyc02g082690.3;Solyc02g085650.4;Solyc02g092570.1;Solyc02g093910.3;Solyc03g043770.4;Solyc03g083210.3;Solyc03g095780.3;Solyc03g113750.3;Solyc03g116480.1;Solyc03g116540.1;Solyc03g118200.4;Solyc03g…
GO:0016758	transferase activity, transferring hexosyl groups	1	1/1315	19/18268	0.73	0.75832	0.90929	Solyc09g061860.4	Solyc09g061860.4
GO:0051740	ethylene binding	1	1/1315	19/18268	0.73	0.75832	0.90929	Solyc06g053710.3	Solyc06g053710.3
GO:1990837	sequence-specific double-stranded DNA binding	1	1/1315	19/18268	0.73	0.75832	0.90929	Solyc02g093940.3	Solyc02g093940.3
GO:0051287	NAD binding	5	5/1315	87/18268	0.8	0.759507	0.90929	Solyc01g081510.4/Solyc02g020940.3/Solyc02g088690.4/Solyc05g050120.3/Solyc06g069550.1	Solyc01g081510.4;Solyc02g020940.3;Solyc02g088690.4;Solyc05g050120.3;Solyc06g069550.1
GO:0016760	cellulose synthase (UDP-forming) activity	2	2/1315	38/18268	0.73	0.769405	0.915464	Solyc07g065660.4/Solyc12g015770.3	Solyc07g065660.4;Solyc12g015770.3
GO:0030145	manganese ion binding	2	2/1315	38/18268	0.73	0.769405	0.915464	Solyc07g041720.1/Solyc11g006730.1	Solyc07g041720.1;Solyc11g006730.1
GO:0005249	voltage-gated potassium channel activity	1	1/1315	20/18268	0.69	0.775735	0.915464	Solyc09g007840.3	Solyc09g007840.3
GO:0009982	pseudouridine synthase activity	1	1/1315	20/18268	0.69	0.775735	0.915464	Solyc02g081810.4	Solyc02g081810.4
GO:0043130	ubiquitin binding	1	1/1315	20/18268	0.69	0.775735	0.915464	Solyc04g007120.4	Solyc04g007120.4
GO:0046873	metal ion transmembrane transporter activity	1	1/1315	20/18268	0.69	0.775735	0.915464	Solyc03g116900.3	Solyc03g116900.3
GO:0003924	GTPase activity	12	12/1315	199/18268	0.84	0.777562	0.915464	Solanum_lycopersicum_newGene_1576/Solyc01g096220.3/Solyc01g103140.3/Solyc01g111560.3/Solyc03g058190.3/Solyc03g118820.4/Solyc06g009960.3/Solyc06g009970.3/Solyc10g007700.3/Solyc11g069700.2/Solyc12g035420.3/Solyc12g089310.2	--;Solyc01g096220.3;Solyc01g103140.3;Solyc01g111560.3;Solyc03g058190.3;Solyc03g118820.4;Solyc06g009960.3;Solyc06g009970.3;Solyc10g007700.3;Solyc11g069700.2;Solyc12g035420.3;Solyc12g089310.2
GO:0016462	pyrophosphatase activity	2	2/1315	39/18268	0.71	0.781822	0.918303	Solyc08g081150.4/Solyc12g035420.3	Solyc08g081150.4;Solyc12g035420.3
GO:0004713	protein tyrosine kinase activity	1	1/1315	21/18268	0.66	0.791897	0.922636	Solyc04g079690.3	Solyc04g079690.3
GO:0016791	phosphatase activity	1	1/1315	21/18268	0.66	0.791897	0.922636	Solyc06g062540.3	Solyc06g062540.3
GO:0035639	purine ribonucleoside triphosphate binding	1	1/1315	21/18268	0.66	0.791897	0.922636	Solyc12g035420.3	Solyc12g035420.3
GO:0046872	metal ion binding	84	84/1315	1261/18268	0.93	0.792939	0.922636	Solanum_lycopersicum_newGene_2882/Solyc01g067620.3/Solyc01g088380.3/Solyc01g096270.3/Solyc01g099150.5.1/Solyc01g099160.4/Solyc01g099600.4/Solyc01g101060.4/Solyc01g104860.3/Solyc01g105160.4/Solyc01g105660.4/Solyc01g107410.3/Solyc01g110020.4/Solyc02g078320.3/Solyc02g084410.3/Solyc02g085640.4/Solyc02g087670.3/Solyc02g090450.3/Solyc02g092580.3/Solyc02g093300.3/Solyc03g006880.3/Solyc03g058890.4/Solyc0…	--;Solyc01g067620.3;Solyc01g088380.3;Solyc01g096270.3;Solyc01g099150.5.1;Solyc01g099160.4;Solyc01g099600.4;Solyc01g101060.4;Solyc01g104860.3;Solyc01g105160.4;Solyc01g105660.4;Solyc01g107410.3;Solyc01g110020.4;Solyc02g078320.3;Solyc02g084410.3;Solyc02g085640.4;Solyc02g087670.3;Solyc02g090450.3;Solyc02g092580.3;Solyc02g093300.3;Solyc03g006880.3;Solyc03g058890.4;Solyc03g058910.3;Solyc03g063720.4;Sol…
GO:0045735	nutrient reservoir activity	3	3/1315	58/18268	0.72	0.797687	0.923956	Solyc01g104110.4/Solyc07g041720.1/Solyc11g006730.1	Solyc01g104110.4;Solyc07g041720.1;Solyc11g006730.1
GO:0004540	ribonuclease activity	1	1/1315	22/18268	0.63	0.806894	0.923956	Solyc02g083140.3	Solyc02g083140.3
GO:0004565	beta-galactosidase activity	1	1/1315	22/18268	0.63	0.806894	0.923956	Solyc09g092160.2	Solyc09g092160.2
GO:0004843	thiol-dependent ubiquitin-specific protease activity	1	1/1315	22/18268	0.63	0.806894	0.923956	Solyc04g076210.3	Solyc04g076210.3
GO:0030554	adenyl nucleotide binding	1	1/1315	22/18268	0.63	0.806894	0.923956	Solyc01g100370.3	Solyc01g100370.3
GO:0032559	adenyl ribonucleotide binding	1	1/1315	22/18268	0.63	0.806894	0.923956	Solyc01g100370.3	Solyc01g100370.3
GO:0005096	GTPase activator activity	3	3/1315	59/18268	0.71	0.807092	0.923956	Solyc01g091080.3/Solyc02g082690.3/Solyc07g049580.3	Solyc01g091080.3;Solyc02g082690.3;Solyc07g049580.3
GO:1901265	nucleoside phosphate binding	2	2/1315	42/18268	0.66	0.81561	0.931562	Solyc01g100370.3/Solyc12g035420.3	Solyc01g100370.3;Solyc12g035420.3
GO:0000155	phosphorelay sensor kinase activity	1	1/1315	23/18268	0.6	0.820811	0.934592	Solyc06g053710.3	Solyc06g053710.3
GO:0008047	enzyme activator activity	2	2/1315	43/18268	0.65	0.825788	0.934592	Solyc02g082690.3/Solyc07g049580.3	Solyc02g082690.3;Solyc07g049580.3
GO:0008146	sulfotransferase activity	2	2/1315	43/18268	0.65	0.825788	0.934592	Solyc03g114800.1/Solyc05g013010.3	Solyc03g114800.1;Solyc05g013010.3
GO:0015267	channel activity	2	2/1315	43/18268	0.65	0.825788	0.934592	Solyc10g078490.2/Solyc12g019690.2	Solyc10g078490.2;Solyc12g019690.2
GO:0003887	DNA-directed DNA polymerase activity	1	1/1315	24/18268	0.58	0.833726	0.934887	Solyc02g093300.3	Solyc02g093300.3
GO:0004675	transmembrane receptor protein serine/threonine kinase activity	1	1/1315	24/18268	0.58	0.833726	0.934887	Solyc01g107250.3	Solyc01g107250.3
GO:0016616	oxidoreductase activity, acting on the CH-OH group of donors, NAD or NADP as acceptor	1	1/1315	24/18268	0.58	0.833726	0.934887	Solyc03g098460.3	Solyc03g098460.3
GO:0043022	ribosome binding	1	1/1315	24/18268	0.58	0.833726	0.934887	Solyc07g066430.3	Solyc07g066430.3
GO:0016773	phosphotransferase activity, alcohol group as acceptor	2	2/1315	44/18268	0.63	0.835456	0.934887	Solyc01g107250.3/Solyc08g078370.4	Solyc01g107250.3;Solyc08g078370.4
GO:0004722	protein serine/threonine phosphatase activity	5	5/1315	98/18268	0.71	0.842683	0.940011	Solyc04g082600.3/Solyc05g052980.4/Solyc07g054300.3/Solyc09g007080.3/Solyc12g010450.3	Solyc04g082600.3;Solyc05g052980.4;Solyc07g054300.3;Solyc09g007080.3;Solyc12g010450.3
GO:0004499	N,N-dimethylaniline monooxygenase activity	1	1/1315	25/18268	0.56	0.845711	0.940011	Solyc01g112100.3	Solyc01g112100.3
GO:0051015	actin filament binding	1	1/1315	25/18268	0.56	0.845711	0.940011	Solyc09g056170.3	Solyc09g056170.3
GO:0005198	structural molecule activity	3	3/1315	64/18268	0.65	0.848736	0.940017	Solyc01g007150.3/Solyc10g078660.2/Solyc10g083740.3	Solyc01g007150.3;Solyc10g078660.2;Solyc10g083740.3
GO:0004190	aspartic-type endopeptidase activity	6	6/1315	116/18268	0.72	0.8495	0.940017	Solyc01g080020.2/Solyc03g005280.4/Solyc04g008850.1/Solyc05g016310.1/Solyc07g045100.1/Solyc09g082760.3	Solyc01g080020.2;Solyc03g005280.4;Solyc04g008850.1;Solyc05g016310.1;Solyc07g045100.1;Solyc09g082760.3
GO:0003714	transcription corepressor activity	2	2/1315	46/18268	0.6	0.85335	0.942179	Solyc03g118540.4/Solyc12g049400.2	Solyc03g118540.4;Solyc12g049400.2
GO:0043621	protein self-association	1	1/1315	26/18268	0.53	0.856832	0.943926	Solyc03g043770.4	Solyc03g043770.4
GO:0008092	cytoskeletal protein binding	2	2/1315	47/18268	0.59	0.861615	0.947094	Solyc01g044556.1/Solyc12g014130.2	Solyc01g044556.1;Solyc12g014130.2
GO:0004601	peroxidase activity	8	8/1315	152/18268	0.73	0.863644	0.947228	Solyc01g007950.4/Solyc01g104860.3/Solyc02g090450.3/Solyc02g092580.3/Solyc04g071890.3/Solyc08g069040.3/Solyc11g018772.1/Solyc11g018805.1	Solyc01g007950.4;Solyc01g104860.3;Solyc02g090450.3;Solyc02g092580.3;Solyc04g071890.3;Solyc08g069040.3;Solyc11g018772.1;Solyc11g018805.1
GO:0008324	cation transmembrane transporter activity	1	1/1315	27/18268	0.51	0.867153	0.948983	Solyc06g076440.3	Solyc06g076440.3
GO:0000981	RNA polymerase II transcription factor activity, sequence-specific DNA binding	1	1/1315	29/18268	0.48	0.885617	0.965326	Solyc06g074120.3	Solyc06g074120.3
GO:0005525	GTP binding	16	16/1315	288/18268	0.77	0.88877	0.965326	Solanum_lycopersicum_newGene_1576/Solyc01g096220.3/Solyc01g103140.3/Solyc01g111560.3/Solyc02g064640.4/Solyc02g064650.3/Solyc03g058190.3/Solyc03g118820.4/Solyc06g009960.3/Solyc06g009970.3/Solyc07g066430.3/Solyc10g007700.3/Solyc11g011040.2/Solyc11g069700.2/Solyc12g035420.3/Solyc12g089310.2	--;Solyc01g096220.3;Solyc01g103140.3;Solyc01g111560.3;Solyc02g064640.4;Solyc02g064650.3;Solyc03g058190.3;Solyc03g118820.4;Solyc06g009960.3;Solyc06g009970.3;Solyc07g066430.3;Solyc10g007700.3;Solyc11g011040.2;Solyc11g069700.2;Solyc12g035420.3;Solyc12g089310.2
GO:0043169	cation binding	2	2/1315	51/18268	0.54	0.890572	0.965326	Solyc01g100370.3/Solyc12g009630.3	Solyc01g100370.3;Solyc12g009630.3
GO:0004725	protein tyrosine phosphatase activity	1	1/1315	30/18268	0.46	0.893864	0.965326	Solyc11g007670.3	Solyc11g007670.3
GO:0005215	transporter activity	1	1/1315	30/18268	0.46	0.893864	0.965326	Solyc01g060070.3	Solyc01g060070.3
GO:0035091	phosphatidylinositol binding	1	1/1315	30/18268	0.46	0.893864	0.965326	Solyc02g062670.3	Solyc02g062670.3
GO:0004525	ribonuclease III activity	2	2/1315	52/18268	0.53	0.896876	0.965326	Solyc10g006200.4/Solyc11g008530.3	Solyc10g006200.4;Solyc11g008530.3
GO:0004197	cysteine-type endopeptidase activity	1	1/1315	31/18268	0.45	0.901516	0.965326	Solyc04g076210.3	Solyc04g076210.3
GO:0005200	structural constituent of cytoskeleton	1	1/1315	31/18268	0.45	0.901516	0.965326	Solyc12g089310.2	Solyc12g089310.2
GO:0018024	histone-lysine N-methyltransferase activity	1	1/1315	31/18268	0.45	0.901516	0.965326	Solyc12g100290.3	Solyc12g100290.3
GO:0005484	SNAP receptor activity	1	1/1315	32/18268	0.43	0.908618	0.967146	Solyc01g006950.3	Solyc01g006950.3
GO:0042626	ATPase activity, coupled to transmembrane movement of substances	3	3/1315	74/18268	0.56	0.909104	0.967146	Solyc02g071350.3/Solyc03g005860.4/Solyc12g044820.3	Solyc02g071350.3;Solyc03g005860.4;Solyc12g044820.3
GO:0003674	molecular_function	88	88/1315	1389/18268	0.88	0.913103	0.967146	Solyc01g005400.3/Solyc01g007267.1/Solyc01g044556.1/Solyc01g060070.3/Solyc01g087050.3/Solyc01g088490.3/Solyc01g095670.4/Solyc01g100370.3/Solyc01g107250.3/Solyc01g108775.1/Solyc02g062670.3/Solyc02g069060.4/Solyc02g069500.1/Solyc02g072010.3/Solyc02g080610.4/Solyc02g082690.3/Solyc02g085650.4/Solyc02g092570.1/Solyc02g093910.3/Solyc03g043770.4/Solyc03g044720.2/Solyc03g083210.3/Solyc03g095780.3/Solyc03g…	Solyc01g005400.3;Solyc01g007267.1;Solyc01g044556.1;Solyc01g060070.3;Solyc01g087050.3;Solyc01g088490.3;Solyc01g095670.4;Solyc01g100370.3;Solyc01g107250.3;Solyc01g108775.1;Solyc02g062670.3;Solyc02g069060.4;Solyc02g069500.1;Solyc02g072010.3;Solyc02g080610.4;Solyc02g082690.3;Solyc02g085650.4;Solyc02g092570.1;Solyc02g093910.3;Solyc03g043770.4;Solyc03g044720.2;Solyc03g083210.3;Solyc03g095780.3;Solyc03g…
GO:0051213	dioxygenase activity	1	1/1315	33/18268	0.42	0.915207	0.967146	Solyc03g006880.3	Solyc03g006880.3
GO:0008270	zinc ion binding	51	51/1315	840/18268	0.84	0.916077	0.967146	Solanum_lycopersicum_newGene_2721/Solanum_lycopersicum_newGene_2979/Solanum_lycopersicum_newGene_860/Solyc01g014180.3/Solyc01g079530.4/Solyc01g079810.4/Solyc01g080850.4/Solyc01g081560.2/Solyc01g086960.3/Solyc01g095160.3/Solyc01g100220.3/Solyc01g108430.3/Solyc02g030480.4/Solyc02g079550.3/Solyc02g081900.4/Solyc02g082290.4/Solyc02g086090.4/Solyc03g033660.4/Solyc03g098420.3/Solyc03g111710.3/Solyc03g1…	--;--;--;Solyc01g014180.3;Solyc01g079530.4;Solyc01g079810.4;Solyc01g080850.4;Solyc01g081560.2;Solyc01g086960.3;Solyc01g095160.3;Solyc01g100220.3;Solyc01g108430.3;Solyc02g030480.4;Solyc02g079550.3;Solyc02g081900.4;Solyc02g082290.4;Solyc02g086090.4;Solyc03g033660.4;Solyc03g098420.3;Solyc03g111710.3;Solyc03g115120.1;Solyc04g015360.3;Solyc04g076610.3;Solyc04g082870.1;Solyc05g051800.3;Solyc05g053200.3…
GO:0016765	transferase activity, transferring alkyl or aryl (other than methyl) groups	5	5/1315	113/18268	0.61	0.916506	0.967146	Solyc07g056490.4/Solyc08g080900.3/Solyc09g011590.4/Solyc09g011650.4/Solyc10g005820.3	Solyc07g056490.4;Solyc08g080900.3;Solyc09g011590.4;Solyc09g011650.4;Solyc10g005820.3
GO:0019899	enzyme binding	6	6/1315	131/18268	0.64	0.916842	0.967146	Solyc02g082690.3/Solyc02g093910.3/Solyc03g120320.1/Solyc07g049580.3/Solyc09g011030.3/Solyc10g007000.3	Solyc02g082690.3;Solyc02g093910.3;Solyc03g120320.1;Solyc07g049580.3;Solyc09g011030.3;Solyc10g007000.3
GO:0000977	RNA polymerase II regulatory region sequence-specific DNA binding	3	3/1315	77/18268	0.54	0.922389	0.970936	Solyc02g071730.4/Solyc11g010570.2/Solyc12g056460.3	Solyc02g071730.4;Solyc11g010570.2;Solyc12g056460.3
GO:0010333	terpene synthase activity	2	2/1315	58/18268	0.48	0.928115	0.974897	Solyc03g006550.4/Solyc12g006570.2	Solyc03g006550.4;Solyc12g006570.2
GO:0000166	nucleotide binding	3	3/1315	80/18268	0.52	0.933875	0.976231	Solyc01g100370.3/Solyc05g052100.3/Solyc12g035420.3	Solyc01g100370.3;Solyc05g052100.3;Solyc12g035420.3
GO:0000976	transcription regulatory region sequence-specific DNA binding	2	2/1315	60/18268	0.46	0.936369	0.976231	Solyc06g053610.3/Solyc10g081490.2	Solyc06g053610.3;Solyc10g081490.2
GO:0017111	nucleoside-triphosphatase activity	1	1/1315	37/18268	0.38	0.937147	0.976231	Solyc12g035420.3	Solyc12g035420.3
GO:0001067	regulatory region nucleic acid binding	1	1/1315	38/18268	0.37	0.941681	0.976231	Solyc05g009170.3	Solyc05g009170.3
GO:0016651	oxidoreductase activity, acting on NAD(P)H	1	1/1315	38/18268	0.37	0.941681	0.976231	Solyc10g052510.2	Solyc10g052510.2
GO:0044212	transcription regulatory region DNA binding	1	1/1315	38/18268	0.37	0.941681	0.976231	Solyc05g009170.3	Solyc05g009170.3
GO:0008134	transcription factor binding	1	1/1315	40/18268	0.35	0.949791	0.976231	Solyc03g116480.1	Solyc03g116480.1
GO:0008233	peptidase activity	1	1/1315	40/18268	0.35	0.949791	0.976231	Solyc04g072032.1	Solyc04g072032.1
GO:0003712	transcription cofactor activity	3	3/1315	86/18268	0.48	0.952282	0.976231	Solyc03g111710.3/Solyc03g118540.4/Solyc12g049400.2	Solyc03g111710.3;Solyc03g118540.4;Solyc12g049400.2
GO:0003755	peptidyl-prolyl cis-trans isomerase activity	2	2/1315	67/18268	0.41	0.95872	0.976231	Solyc01g110530.3/Solyc06g083190.4	Solyc01g110530.3;Solyc06g083190.4
GO:0016740	transferase activity	20	20/1315	389/18268	0.71	0.959568	0.976231	Solyc00g500047.1/Solyc01g086680.4/Solyc01g107250.3/Solyc02g093110.3/Solyc03g116480.1/Solyc03g119980.3/Solyc03g122120.4/Solyc05g007895.1/Solyc05g008640.1/Solyc06g073890.3/Solyc07g032170.3/Solyc07g045190.3/Solyc07g056490.4/Solyc08g042100.3/Solyc08g077100.3/Solyc08g080900.3/Solyc09g011590.4/Solyc09g011650.4/Solyc09g065870.4/Solyc10g007000.3	Solyc00g500047.1;Solyc01g086680.4;Solyc01g107250.3;Solyc02g093110.3;Solyc03g116480.1;Solyc03g119980.3;Solyc03g122120.4;Solyc05g007895.1;Solyc05g008640.1;Solyc06g073890.3;Solyc07g032170.3;Solyc07g045190.3;Solyc07g056490.4;Solyc08g042100.3;Solyc08g077100.3;Solyc08g080900.3;Solyc09g011590.4;Solyc09g011650.4;Solyc09g065870.4;Solyc10g007000.3
GO:0004721	phosphoprotein phosphatase activity	1	1/1315	43/18268	0.32	0.959893	0.976231	Solyc06g053630.3	Solyc06g053630.3
GO:0046933	proton-transporting ATP synthase activity, rotational mechanism	1	1/1315	43/18268	0.32	0.959893	0.976231	Solyc12g005060.1	Solyc12g005060.1
GO:0016887	ATPase activity	10	10/1315	222/18268	0.63	0.962499	0.976231	Solyc02g071350.3/Solyc03g005860.4/Solyc05g055330.3/Solyc06g075310.4/Solyc07g066430.3/Solyc08g075360.3/Solyc09g091670.3/Solyc11g009100.2/Solyc12g044820.3/Solyc12g100180.2	Solyc02g071350.3;Solyc03g005860.4;Solyc05g055330.3;Solyc06g075310.4;Solyc07g066430.3;Solyc08g075360.3;Solyc09g091670.3;Solyc11g009100.2;Solyc12g044820.3;Solyc12g100180.2
GO:0003680	AT DNA binding	1	1/1315	44/18268	0.32	0.962787	0.976231	Solyc04g076220.3	Solyc04g076220.3
GO:0016772	transferase activity, transferring phosphorus-containing groups	1	1/1315	44/18268	0.32	0.962787	0.976231	Solyc01g107250.3	Solyc01g107250.3
GO:0016817	hydrolase activity, acting on acid anhydrides	1	1/1315	44/18268	0.32	0.962787	0.976231	Solyc12g035420.3	Solyc12g035420.3
GO:0051537	2 iron, 2 sulfur cluster binding	1	1/1315	45/18268	0.31	0.965472	0.97696	Solyc11g006910.3	Solyc11g006910.3
GO:0016818	hydrolase activity, acting on acid anhydrides, in phosphorus-containing anhydrides	1	1/1315	47/18268	0.3	0.970276	0.979825	Solyc12g035420.3	Solyc12g035420.3
GO:0005515	protein binding	60	60/1315	1044/18268	0.8	0.976018	0.979919	Solanum_lycopersicum_newGene_726/Solyc01g005970.3/Solyc01g044556.1/Solyc01g060070.3/Solyc01g088250.4/Solyc01g107250.3/Solyc01g107670.2/Solyc02g062670.3/Solyc02g080610.4/Solyc02g081200.1/Solyc02g082690.3/Solyc02g089360.4/Solyc02g092480.4/Solyc02g093910.3/Solyc03g043770.4/Solyc03g044090.4/Solyc03g082870.4/Solyc03g083100.3/Solyc03g083210.3/Solyc03g095780.3/Solyc03g112750.4/Solyc03g114960.4/Solyc03g1…	--;Solyc01g005970.3;Solyc01g044556.1;Solyc01g060070.3;Solyc01g088250.4;Solyc01g107250.3;Solyc01g107670.2;Solyc02g062670.3;Solyc02g080610.4;Solyc02g081200.1;Solyc02g082690.3;Solyc02g089360.4;Solyc02g092480.4;Solyc02g093910.3;Solyc03g043770.4;Solyc03g044090.4;Solyc03g082870.4;Solyc03g083100.3;Solyc03g083210.3;Solyc03g095780.3;Solyc03g112750.4;Solyc03g114960.4;Solyc03g115410.3;Solyc03g116480.1;Solyc…
GO:0009824	AMP dimethylallyltransferase activity	1	1/1315	53/18268	0.26	0.981037	0.979919	Solyc09g064910.1	Solyc09g064910.1
GO:0048038	quinone binding	1	1/1315	55/18268	0.25	0.983677	0.979919	Solyc05g013440.3	Solyc05g013440.3
GO:0019843	rRNA binding	2	2/1315	82/18268	0.34	0.984074	0.979919	Solyc00g500047.1/Solyc06g066660.4	Solyc00g500047.1;Solyc06g066660.4
GO:0003729	mRNA binding	2	2/1315	85/18268	0.33	0.98688	0.979919	Solyc02g085650.4/Solyc10g083740.3	Solyc02g085650.4;Solyc10g083740.3
GO:0016168	chlorophyll binding	1	1/1315	59/18268	0.24	0.987905	0.979919	Solyc12g009200.2	Solyc12g009200.2
GO:0005507	copper ion binding	2	2/1315	95/18268	0.29	0.993172	0.979919	Solyc05g013440.3/Solyc07g052230.3	Solyc05g013440.3;Solyc07g052230.3
GO:0004386	helicase activity	1	1/1315	67/18268	0.21	0.993361	0.979919	Solyc12g089010.3	Solyc12g089010.3
GO:0003743	translation initiation factor activity	1	1/1315	71/18268	0.2	0.995081	0.979919	Solyc03g095840.3	Solyc03g095840.3
GO:0003676	nucleic acid binding	50	50/1315	968/18268	0.72	0.996384	0.979919	Solanum_lycopersicum_newGene_1487/Solanum_lycopersicum_newGene_2721/Solanum_lycopersicum_newGene_2979/Solanum_lycopersicum_newGene_677/Solanum_lycopersicum_newGene_860/Solyc01g005540.4/Solyc01g007267.1/Solyc01g007840.3/Solyc01g087050.3/Solyc01g088490.3/Solyc01g096570.3/Solyc01g108430.3/Solyc02g069500.1/Solyc02g072010.3/Solyc02g085650.4/Solyc02g092570.1/Solyc03g113750.3/Solyc03g115120.1/Solyc03g11…	--;--;--;--;--;Solyc01g005540.4;Solyc01g007267.1;Solyc01g007840.3;Solyc01g087050.3;Solyc01g088490.3;Solyc01g096570.3;Solyc01g108430.3;Solyc02g069500.1;Solyc02g072010.3;Solyc02g085650.4;Solyc02g092570.1;Solyc03g113750.3;Solyc03g115120.1;Solyc03g116540.1;Solyc03g123400.1;Solyc03g150117.1;Solyc04g010050.4;Solyc04g010060.2;Solyc04g016380.3;Solyc04g064660.1;Solyc04g076610.3;Solyc04g079150.1;Solyc05g00…
GO:0003899	DNA-directed 5'-3' RNA polymerase activity	1	1/1315	76/18268	0.18	0.99662	0.979919	Solyc11g072730.2	Solyc11g072730.2
GO:0051082	unfolded protein binding	1	1/1315	81/18268	0.17	0.997677	0.979919	Solyc01g103450.3	Solyc01g103450.3
GO:0008234	cysteine-type peptidase activity	2	2/1315	112/18268	0.25	0.997795	0.979919	Solyc03g150157.1/Solyc04g080873.1	Solyc03g150157.1;Solyc04g080873.1
GO:0003723	RNA binding	49	49/1315	1027/18268	0.66	0.999564	0.979919	Solyc01g007267.1/Solyc01g009670.4/Solyc01g088490.3/Solyc01g104590.3/Solyc01g106020.3/Solyc02g069500.1/Solyc02g072010.3/Solyc02g081810.4/Solyc02g083140.3/Solyc02g085650.4/Solyc02g086590.3/Solyc03g082390.3/Solyc03g113750.3/Solyc03g116540.1/Solyc03g120480.3/Solyc03g121450.3/Solyc04g010050.4/Solyc04g010060.2/Solyc04g014820.4/Solyc04g016380.3/Solyc04g064660.1/Solyc04g079150.1/Solyc05g006460.3/Solyc05g…	Solyc01g007267.1;Solyc01g009670.4;Solyc01g088490.3;Solyc01g104590.3;Solyc01g106020.3;Solyc02g069500.1;Solyc02g072010.3;Solyc02g081810.4;Solyc02g083140.3;Solyc02g085650.4;Solyc02g086590.3;Solyc03g082390.3;Solyc03g113750.3;Solyc03g116540.1;Solyc03g120480.3;Solyc03g121450.3;Solyc04g010050.4;Solyc04g010060.2;Solyc04g014820.4;Solyc04g016380.3;Solyc04g064660.1;Solyc04g079150.1;Solyc05g006460.3;Solyc05g…
GO:0003735	structural constituent of ribosome	16	16/1315	493/18268	0.45	0.999954	0.979919	Solyc00g500047.1/Solyc01g066840.3/Solyc01g104590.3/Solyc03g025520.4/Solyc05g007560.3/Solyc05g026217.1/Solyc05g051000.3/Solyc06g005110.3/Solyc06g066660.4/Solyc07g025457.1/Solyc08g006900.3/Solyc08g075700.3/Solyc08g083120.3/Solyc09g056130.4/Solyc10g078660.2/Solyc10g083740.3	Solyc00g500047.1;Solyc01g066840.3;Solyc01g104590.3;Solyc03g025520.4;Solyc05g007560.3;Solyc05g026217.1;Solyc05g051000.3;Solyc06g005110.3;Solyc06g066660.4;Solyc07g025457.1;Solyc08g006900.3;Solyc08g075700.3;Solyc08g083120.3;Solyc09g056130.4;Solyc10g078660.2;Solyc10g083740.3

## Sheet: Table S5
Supplementary Table S5. Enriched functional groups in cellular component ontology (CC) in genes with different expression patterns between resistant and susceptible lines
ID	Description	Count	GeneRatio	BgRatio	enrich_factor	pvalue	qvalue	geneID	gene_name
GO:0042555	MCM complex	6	6/926	9/13588	9.78	6.93e-06	0.00160731	Solyc01g079500.4/Solyc01g110130.3/Solyc02g070780.4/Solyc02g082180.3/Solyc07g005020.3/Solyc11g040120.3	Solyc01g079500.4;Solyc01g110130.3;Solyc02g070780.4;Solyc02g082180.3;Solyc07g005020.3;Solyc11g040120.3
GO:0000786	nucleosome	19	19/926	100/13588	2.79	3.86e-05	0.00448001	Solyc01g080600.4/Solyc01g099410.3/Solyc01g106940.4/Solyc02g038690.1/Solyc03g071620.2/Solyc04g011390.1/Solyc04g074580.1/Solyc06g005390.1/Solyc06g005420.1/Solyc06g005430.1/Solyc06g074750.1/Solyc06g075800.1/Solyc06g075850.1/Solyc06g075930.1/Solyc06g075960.1/Solyc06g084090.4/Solyc06g084430.4/Solyc10g008910.1/Solyc11g072860.2	Solyc01g080600.4;Solyc01g099410.3;Solyc01g106940.4;Solyc02g038690.1;Solyc03g071620.2;Solyc04g011390.1;Solyc04g074580.1;Solyc06g005390.1;Solyc06g005420.1;Solyc06g005430.1;Solyc06g074750.1;Solyc06g075800.1;Solyc06g075850.1;Solyc06g075930.1;Solyc06g075960.1;Solyc06g084090.4;Solyc06g084430.4;Solyc10g008910.1;Solyc11g072860.2
GO:0042025	host cell nucleus	26	26/926	202/13588	1.89	0.00128608	0.0808275	Solyc01g106940.4/Solyc02g082820.3/Solyc02g090820.3/Solyc03g026020.3/Solyc03g111710.3/Solyc03g114850.4/Solyc04g007120.4/Solyc04g011390.1/Solyc05g006050.3/Solyc06g005420.1/Solyc06g005430.1/Solyc06g075850.1/Solyc06g075930.1/Solyc06g075960.1/Solyc07g032480.3/Solyc07g055710.3/Solyc08g080540.3/Solyc09g009100.4/Solyc09g065660.4/Solyc09g082670.3/Solyc10g009420.3/Solyc10g078700.3/Solyc11g010460.3/Solyc11g…	Solyc01g106940.4;Solyc02g082820.3;Solyc02g090820.3;Solyc03g026020.3;Solyc03g111710.3;Solyc03g114850.4;Solyc04g007120.4;Solyc04g011390.1;Solyc05g006050.3;Solyc06g005420.1;Solyc06g005430.1;Solyc06g075850.1;Solyc06g075930.1;Solyc06g075960.1;Solyc07g032480.3;Solyc07g055710.3;Solyc08g080540.3;Solyc09g009100.4;Solyc09g065660.4;Solyc09g082670.3;Solyc10g009420.3;Solyc10g078700.3;Solyc11g010460.3;Solyc11g…
GO:0016021	integral component of membrane	486	486/926	6480/13588	1.1	0.00139358	0.0808275	Solanum_lycopersicum_newGene_1010/Solanum_lycopersicum_newGene_2315/Solanum_lycopersicum_newGene_315/Solanum_lycopersicum_newGene_3264/Solyc01g005040.3/Solyc01g005340.3/Solyc01g005620.3/Solyc01g005980.4/Solyc01g006000.3/Solyc01g006550.3/Solyc01g006950.3/Solyc01g007170.4/Solyc01g008020.4/Solyc01g008500.4/Solyc01g009030.4/Solyc01g009310.3/Solyc01g010290.4/Solyc01g010990.2/Solyc01g014270.3/Solyc01g0…	--;--;--;--;Solyc01g005040.3;Solyc01g005340.3;Solyc01g005620.3;Solyc01g005980.4;Solyc01g006000.3;Solyc01g006550.3;Solyc01g006950.3;Solyc01g007170.4;Solyc01g008020.4;Solyc01g008500.4;Solyc01g009030.4;Solyc01g009310.3;Solyc01g010290.4;Solyc01g010990.2;Solyc01g014270.3;Solyc01g017600.3;Solyc01g060070.3;Solyc01g066430.3;Solyc01g066820.4;Solyc01g067510.3;Solyc01g067570.3;Solyc01g079400.3;Solyc01g07953…
GO:0005634	nucleus	226	226/926	2838/13588	1.17	0.00405315	0.188066	Solanum_lycopersicum_newGene_1538/Solyc01g006650.2/Solyc01g044558.1/Solyc01g066730.4/Solyc01g073910.4/Solyc01g079500.4/Solyc01g080600.4/Solyc01g087050.3/Solyc01g088380.3/Solyc01g090340.3/Solyc01g090460.3/Solyc01g091420.2/Solyc01g093965.2/Solyc01g096840.3/Solyc01g099410.3/Solyc01g100200.3/Solyc01g107410.3/Solyc01g107510.3/Solyc01g108430.3/Solyc01g108610.3/Solyc01g110130.3/Solyc01g111500.3/Solyc01g…	--;Solyc01g006650.2;Solyc01g044558.1;Solyc01g066730.4;Solyc01g073910.4;Solyc01g079500.4;Solyc01g080600.4;Solyc01g087050.3;Solyc01g088380.3;Solyc01g090340.3;Solyc01g090460.3;Solyc01g091420.2;Solyc01g093965.2;Solyc01g096840.3;Solyc01g099410.3;Solyc01g100200.3;Solyc01g107410.3;Solyc01g107510.3;Solyc01g108430.3;Solyc01g108610.3;Solyc01g110130.3;Solyc01g111500.3;Solyc01g111590.4;Solyc02g021060.4;Solyc…
GO:0030286	dynein complex	4	4/926	13/13588	4.52	0.00932054	0.360394	Solyc06g071180.3/Solyc07g063610.4/Solyc12g006630.2/Solyc12g044240.3	Solyc06g071180.3;Solyc07g063610.4;Solyc12g006630.2;Solyc12g044240.3
GO:0042170	plastid membrane	5	5/926	26/13588	2.82	0.0288586	0.930025	Solyc01g060070.3/Solyc01g088490.3/Solyc08g080090.3/Solyc08g082870.3/Solyc12g019740.2	Solyc01g060070.3;Solyc01g088490.3;Solyc08g080090.3;Solyc08g082870.3;Solyc12g019740.2
GO:0005885	Arp2/3 protein complex	3	3/926	12/13588	3.67	0.0436604	0.930025	Solyc02g094320.3/Solyc09g090550.3/Solyc12g098430.2	Solyc02g094320.3;Solyc09g090550.3;Solyc12g098430.2
GO:0005874	microtubule	12	12/926	103/13588	1.71	0.0472533	0.930025	Solyc01g066820.4/Solyc01g096840.3/Solyc02g062330.3/Solyc02g067100.3/Solyc03g116370.3/Solyc03g119220.3/Solyc07g053790.2/Solyc07g063610.4/Solyc10g008210.3/Solyc12g014130.2/Solyc12g044240.3/Solyc12g089310.2	Solyc01g066820.4;Solyc01g096840.3;Solyc02g062330.3;Solyc02g067100.3;Solyc03g116370.3;Solyc03g119220.3;Solyc07g053790.2;Solyc07g063610.4;Solyc10g008210.3;Solyc12g014130.2;Solyc12g044240.3;Solyc12g089310.2
GO:0031969	chloroplast membrane	5	5/926	32/13588	2.29	0.0633261	0.930025	Solyc01g060070.3/Solyc08g080090.3/Solyc08g082870.3/Solyc12g019740.2/Solyc12g042950.2	Solyc01g060070.3;Solyc08g080090.3;Solyc08g082870.3;Solyc12g019740.2;Solyc12g042950.2
GO:0044391	ribosomal subunit	3	3/926	14/13588	3.14	0.0653096	0.930025	Solyc08g006470.4/Solyc10g078660.2/Solyc10g083740.3	Solyc08g006470.4;Solyc10g078660.2;Solyc10g083740.3
GO:0005658	alpha DNA polymerase:primase complex	1	1/926	1/13588	14.67	0.0681484	0.930025	Solyc02g093300.3	Solyc02g093300.3
GO:0005797	Golgi medial cisterna	1	1/926	1/13588	14.67	0.0681484	0.930025	Solyc07g018230.2	Solyc07g018230.2
GO:0031985	Golgi cisterna	1	1/926	1/13588	14.67	0.0681484	0.930025	Solyc07g018230.2	Solyc07g018230.2
GO:0033185	dolichol-phosphate-mannose synthase complex	1	1/926	1/13588	14.67	0.0681484	0.930025	Solyc04g082390.3	Solyc04g082390.3
GO:0070176	DRM complex	1	1/926	1/13588	14.67	0.0681484	0.930025	Solyc04g082450.3	Solyc04g082450.3
GO:0090730	Las1 complex	1	1/926	1/13588	14.67	0.0681484	0.930025	Solyc07g045370.3	Solyc07g045370.3
GO:0022626	cytosolic ribosome	4	4/926	24/13588	2.45	0.0766548	0.987996	Solyc05g009170.3/Solyc08g006470.4/Solyc10g078660.2/Solyc10g083740.3	Solyc05g009170.3;Solyc08g006470.4;Solyc10g078660.2;Solyc10g083740.3
GO:0005789	endoplasmic reticulum membrane	14	14/926	140/13588	1.47	0.0956243	0.999977	Solyc01g006000.3/Solyc01g080850.4/Solyc01g088650.4/Solyc01g095200.3/Solyc01g107250.3/Solyc02g032930.3/Solyc02g082260.3/Solyc02g083260.3/Solyc02g085850.1/Solyc03g098460.3/Solyc04g082670.4/Solyc06g053710.3/Solyc07g053700.4/Solyc10g054880.3	Solyc01g006000.3;Solyc01g080850.4;Solyc01g088650.4;Solyc01g095200.3;Solyc01g107250.3;Solyc02g032930.3;Solyc02g082260.3;Solyc02g083260.3;Solyc02g085850.1;Solyc03g098460.3;Solyc04g082670.4;Solyc06g053710.3;Solyc07g053700.4;Solyc10g054880.3
GO:0044445	cytosolic part	4	4/926	26/13588	2.26	0.0970518	0.999977	Solyc05g009170.3/Solyc08g006470.4/Solyc10g078660.2/Solyc10g083740.3	Solyc05g009170.3;Solyc08g006470.4;Solyc10g078660.2;Solyc10g083740.3
GO:0030117	membrane coat	2	2/926	8/13588	3.67	0.0987559	0.999977	Solyc02g085240.4/Solyc03g120260.4	Solyc02g085240.4;Solyc03g120260.4
GO:0005618	cell wall	17	17/926	178/13588	1.4	0.0993419	0.999977	Solyc01g081060.4/Solyc02g080220.3/Solyc03g031800.3/Solyc03g098430.4/Solyc03g115890.3/Solyc04g008210.2/Solyc04g081870.4/Solyc06g034360.2/Solyc07g041720.1/Solyc07g065090.2/Solyc08g005800.4/Solyc09g010860.4/Solyc09g014480.3/Solyc09g097780.2/Solyc11g006730.1/Solyc12g017240.2/Solyc12g098603.1	Solyc01g081060.4;Solyc02g080220.3;Solyc03g031800.3;Solyc03g098430.4;Solyc03g115890.3;Solyc04g008210.2;Solyc04g081870.4;Solyc06g034360.2;Solyc07g041720.1;Solyc07g065090.2;Solyc08g005800.4;Solyc09g010860.4;Solyc09g014480.3;Solyc09g097780.2;Solyc11g006730.1;Solyc12g017240.2;Solyc12g098603.1
GO:0000138	Golgi trans cisterna	1	1/926	2/13588	7.34	0.131657	0.999977	Solyc07g018230.2	Solyc07g018230.2
GO:0005782	peroxisomal matrix	1	1/926	2/13588	7.34	0.131657	0.999977	Solyc08g077440.3	Solyc08g077440.3
GO:0005880	nuclear microtubule	1	1/926	2/13588	7.34	0.131657	0.999977	Solyc01g096840.3	Solyc01g096840.3
GO:0031390	Ctf18 RFC-like complex	1	1/926	2/13588	7.34	0.131657	0.999977	Solyc06g051300.3	Solyc06g051300.3
GO:0098807	chloroplast thylakoid membrane protein complex	1	1/926	2/13588	7.34	0.131657	0.999977	Solyc01g095670.4	Solyc01g095670.4
GO:0005802	trans-Golgi network	4	4/926	29/13588	2.02	0.131793	0.999977	Solyc02g093910.3/Solyc04g080360.4/Solyc07g018230.2/Solyc08g068150.4	Solyc02g093910.3;Solyc04g080360.4;Solyc07g018230.2;Solyc08g068150.4
GO:0031977	thylakoid lumen	2	2/926	10/13588	2.93	0.145188	0.999977	Solyc02g071190.4/Solyc03g019660.4	Solyc02g071190.4;Solyc03g019660.4
GO:0044431	Golgi apparatus part	3	3/926	21/13588	2.1	0.168812	0.999977	Solyc02g093910.3/Solyc03g120260.4/Solyc07g018230.2	Solyc02g093910.3;Solyc03g120260.4;Solyc07g018230.2
GO:0000419	DNA-directed RNA polymerase V complex	2	2/926	11/13588	2.67	0.169796	0.999977	Solyc03g083210.3/Solyc09g048970.3	Solyc03g083210.3;Solyc09g048970.3
GO:0005819	spindle	3	3/926	22/13588	2	0.186201	0.999977	Solyc02g067100.3/Solyc07g053790.2/Solyc10g008210.3	Solyc02g067100.3;Solyc07g053790.2;Solyc10g008210.3
GO:0009526	plastid envelope	7	7/926	69/13588	1.49	0.188827	0.999977	Solyc01g060070.3/Solyc01g088490.3/Solyc01g095670.4/Solyc08g080090.3/Solyc08g082870.3/Solyc09g098090.4/Solyc12g019740.2	Solyc01g060070.3;Solyc01g088490.3;Solyc01g095670.4;Solyc08g080090.3;Solyc08g082870.3;Solyc09g098090.4;Solyc12g019740.2
GO:0000418	DNA-directed RNA polymerase IV complex	1	1/926	3/13588	4.89	0.190842	0.999977	Solyc09g048970.3	Solyc09g048970.3
GO:0005795	Golgi stack	1	1/926	3/13588	4.89	0.190842	0.999977	Solyc07g018230.2	Solyc07g018230.2
GO:0030120	vesicle coat	1	1/926	3/13588	4.89	0.190842	0.999977	Solyc03g120260.4	Solyc03g120260.4
GO:0030137	COPI-coated vesicle	1	1/926	3/13588	4.89	0.190842	0.999977	Solyc03g120260.4	Solyc03g120260.4
GO:0045252	oxoglutarate dehydrogenase complex	1	1/926	3/13588	4.89	0.190842	0.999977	Solyc05g053300.3	Solyc05g053300.3
GO:0048475	coated membrane	1	1/926	3/13588	4.89	0.190842	0.999977	Solyc03g120260.4	Solyc03g120260.4
GO:0090406	pollen tube	2	2/926	12/13588	2.45	0.195023	0.999977	Solyc04g058070.3/Solyc07g056650.4	Solyc04g058070.3;Solyc07g056650.4
GO:0031410	cytoplasmic vesicle	6	6/926	59/13588	1.49	0.212165	0.999977	Solyc02g082690.3/Solyc02g093910.3/Solyc03g120260.4/Solyc04g026360.3/Solyc07g049580.3/Solyc12g035420.3	Solyc02g082690.3;Solyc02g093910.3;Solyc03g120260.4;Solyc04g026360.3;Solyc07g049580.3;Solyc12g035420.3
GO:0009505	plant-type cell wall	4	4/926	35/13588	1.68	0.213299	0.999977	Solyc01g112000.4/Solyc04g072850.4/Solyc07g065090.2/Solyc09g014480.3	Solyc01g112000.4;Solyc04g072850.4;Solyc07g065090.2;Solyc09g014480.3
GO:0000796	condensin complex	1	1/926	4/13588	3.67	0.245997	0.999977	Solyc11g011370.2	Solyc11g011370.2
GO:0000798	nuclear cohesin complex	1	1/926	4/13588	3.67	0.245997	0.999977	Solyc01g086690.2	Solyc01g086690.2
GO:0000808	origin recognition complex	1	1/926	4/13588	3.67	0.245997	0.999977	Solyc06g073500.3	Solyc06g073500.3
GO:0005798	Golgi-associated vesicle	1	1/926	4/13588	3.67	0.245997	0.999977	Solyc03g120260.4	Solyc03g120260.4
GO:0005901	caveola	1	1/926	4/13588	3.67	0.245997	0.999977	Solyc03g117250.4	Solyc03g117250.4
GO:0016602	CCAAT-binding factor complex	1	1/926	4/13588	3.67	0.245997	0.999977	Solyc01g087240.3	Solyc01g087240.3
GO:0030660	Golgi-associated vesicle membrane	1	1/926	4/13588	3.67	0.245997	0.999977	Solyc03g120260.4	Solyc03g120260.4
GO:0030662	coated vesicle membrane	1	1/926	4/13588	3.67	0.245997	0.999977	Solyc03g120260.4	Solyc03g120260.4
GO:0042765	GPI-anchor transamidase complex	1	1/926	4/13588	3.67	0.245997	0.999977	Solyc09g059960.3	Solyc09g059960.3
GO:0071339	MLL1 complex	1	1/926	4/13588	3.67	0.245997	0.999977	Solyc07g032510.3	Solyc07g032510.3
GO:0090404	pollen tube tip	1	1/926	4/13588	3.67	0.245997	0.999977	Solyc07g056650.4	Solyc07g056650.4
GO:0000139	Golgi membrane	8	8/926	89/13588	1.32	0.259844	0.999977	Solyc01g007150.3/Solyc01g088790.2/Solyc01g095290.4/Solyc03g026290.3/Solyc03g026300.4/Solyc04g080080.3/Solyc08g007340.3/Solyc09g098520.4	Solyc01g007150.3;Solyc01g088790.2;Solyc01g095290.4;Solyc03g026290.3;Solyc03g026300.4;Solyc04g080080.3;Solyc08g007340.3;Solyc09g098520.4
GO:0031463	Cul3-RING ubiquitin ligase complex	2	2/926	15/13588	1.96	0.272551	0.999977	Solyc01g005970.3/Solyc08g081840.3	Solyc01g005970.3;Solyc08g081840.3
GO:0005787	signal peptidase complex	1	1/926	5/13588	2.93	0.297396	0.999977	Solyc04g072032.1	Solyc04g072032.1
GO:0030135	coated vesicle	1	1/926	5/13588	2.93	0.297396	0.999977	Solyc03g120260.4	Solyc03g120260.4
GO:0030141	secretory granule	1	1/926	5/13588	2.93	0.297396	0.999977	Solyc02g082690.3	Solyc02g082690.3
GO:0030663	COPI-coated vesicle membrane	1	1/926	5/13588	2.93	0.297396	0.999977	Solyc03g120260.4	Solyc03g120260.4
GO:0031350	intrinsic component of plastid membrane	1	1/926	5/13588	2.93	0.297396	0.999977	Solyc01g060070.3	Solyc01g060070.3
GO:0031351	integral component of plastid membrane	1	1/926	5/13588	2.93	0.297396	0.999977	Solyc01g060070.3	Solyc01g060070.3
GO:0031354	intrinsic component of plastid outer membrane	1	1/926	5/13588	2.93	0.297396	0.999977	Solyc01g060070.3	Solyc01g060070.3
GO:0031355	integral component of plastid outer membrane	1	1/926	5/13588	2.93	0.297396	0.999977	Solyc01g060070.3	Solyc01g060070.3
GO:0031358	intrinsic component of chloroplast outer membrane	1	1/926	5/13588	2.93	0.297396	0.999977	Solyc01g060070.3	Solyc01g060070.3
GO:0031359	integral component of chloroplast outer membrane	1	1/926	5/13588	2.93	0.297396	0.999977	Solyc01g060070.3	Solyc01g060070.3
GO:0045239	tricarboxylic acid cycle enzyme complex	1	1/926	5/13588	2.93	0.297396	0.999977	Solyc09g075450.3	Solyc09g075450.3
GO:0046658	anchored component of plasma membrane	3	3/926	28/13588	1.57	0.297426	0.999977	Solyc02g065765.1/Solyc07g045440.1/Solyc10g005100.3	Solyc02g065765.1;Solyc07g045440.1;Solyc10g005100.3
GO:0071944	cell periphery	25	25/926	326/13588	1.13	0.297875	0.999977	Solyc01g100370.3/Solyc01g107250.3/Solyc02g062670.3/Solyc02g070210.3/Solyc02g071830.3/Solyc02g082690.3/Solyc02g090070.3/Solyc02g092480.4/Solyc03g006050.4/Solyc03g043770.4/Solyc03g044090.4/Solyc03g118200.4/Solyc03g119980.3/Solyc06g073890.3/Solyc07g045440.1/Solyc07g056650.4/Solyc07g063350.3/Solyc07g065090.2/Solyc07g065680.3/Solyc08g082870.3/Solyc09g014480.3/Solyc09g097780.2/Solyc09g098090.4/Solyc10g…	Solyc01g100370.3;Solyc01g107250.3;Solyc02g062670.3;Solyc02g070210.3;Solyc02g071830.3;Solyc02g082690.3;Solyc02g090070.3;Solyc02g092480.4;Solyc03g006050.4;Solyc03g043770.4;Solyc03g044090.4;Solyc03g118200.4;Solyc03g119980.3;Solyc06g073890.3;Solyc07g045440.1;Solyc07g056650.4;Solyc07g063350.3;Solyc07g065090.2;Solyc07g065680.3;Solyc08g082870.3;Solyc09g014480.3;Solyc09g097780.2;Solyc09g098090.4;Solyc10g…
GO:0098791	Golgi subcompartment	2	2/926	16/13588	1.83	0.298499	0.999977	Solyc02g093910.3/Solyc07g018230.2	Solyc02g093910.3;Solyc07g018230.2
GO:0098827	endoplasmic reticulum subcompartment	2	2/926	17/13588	1.73	0.324293	0.999977	Solyc01g107250.3/Solyc03g098460.3	Solyc01g107250.3;Solyc03g098460.3
GO:0097708	intracellular vesicle	5	5/926	56/13588	1.31	0.333854	0.999977	Solyc02g082690.3/Solyc02g093910.3/Solyc03g120260.4/Solyc07g049580.3/Solyc12g035420.3	Solyc02g082690.3;Solyc02g093910.3;Solyc03g120260.4;Solyc07g049580.3;Solyc12g035420.3
GO:0000015	phosphopyruvate hydratase complex	1	1/926	6/13588	2.45	0.345295	0.999977	Solyc02g150124.1	Solyc02g150124.1
GO:0005801	cis-Golgi network	1	1/926	6/13588	2.45	0.345295	0.999977	Solyc07g017520.4	Solyc07g017520.4
GO:0031304	intrinsic component of mitochondrial inner membrane	1	1/926	6/13588	2.45	0.345295	0.999977	Solyc01g060070.3	Solyc01g060070.3
GO:0035838	growing cell tip	1	1/926	6/13588	2.45	0.345295	0.999977	Solyc07g056650.4	Solyc07g056650.4
GO:0098573	intrinsic component of mitochondrial membrane	1	1/926	6/13588	2.45	0.345295	0.999977	Solyc01g060070.3	Solyc01g060070.3
GO:0099503	secretory vesicle	1	1/926	6/13588	2.45	0.345295	0.999977	Solyc02g082690.3	Solyc02g082690.3
GO:0030126	COPI vesicle coat	2	2/926	18/13588	1.63	0.349832	0.999977	Solyc01g007150.3/Solyc03g120260.4	Solyc01g007150.3;Solyc03g120260.4
GO:0022625	cytosolic large ribosomal subunit	4	4/926	44/13588	1.33	0.352307	0.999977	Solyc01g104590.3/Solyc08g006470.4/Solyc10g078660.2/Solyc10g083740.3	Solyc01g104590.3;Solyc08g006470.4;Solyc10g078660.2;Solyc10g083740.3
GO:0030014	CCR4-NOT complex	2	2/926	19/13588	1.54	0.375033	0.999977	Solyc01g007840.3/Solyc10g006190.4	Solyc01g007840.3;Solyc10g006190.4
GO:0042175	nuclear outer membrane-endoplasmic reticulum membrane network	2	2/926	19/13588	1.54	0.375033	0.999977	Solyc01g107250.3/Solyc03g098460.3	Solyc01g107250.3;Solyc03g098460.3
GO:0055029	nuclear DNA-directed RNA polymerase complex	2	2/926	19/13588	1.54	0.375033	0.999977	Solyc03g083210.3/Solyc09g048970.3	Solyc03g083210.3;Solyc09g048970.3
GO:0012506	vesicle membrane	1	1/926	7/13588	2.1	0.389932	0.999977	Solyc03g120260.4	Solyc03g120260.4
GO:0032580	Golgi cisterna membrane	1	1/926	7/13588	2.1	0.389932	0.999977	Solyc03g115830.2	Solyc03g115830.2
GO:0032592	integral component of mitochondrial membrane	1	1/926	7/13588	2.1	0.389932	0.999977	Solyc01g060070.3	Solyc01g060070.3
GO:0051286	cell tip	1	1/926	7/13588	2.1	0.389932	0.999977	Solyc07g056650.4	Solyc07g056650.4
GO:0016459	myosin complex	2	2/926	20/13588	1.47	0.399822	0.999977	Solyc03g007480.3/Solyc06g008090.3	Solyc03g007480.3;Solyc06g008090.3
GO:0031982	vesicle	5	5/926	62/13588	1.18	0.416635	0.999977	Solyc02g082690.3/Solyc02g093910.3/Solyc03g120260.4/Solyc07g049580.3/Solyc12g035420.3	Solyc02g082690.3;Solyc02g093910.3;Solyc03g120260.4;Solyc07g049580.3;Solyc12g035420.3
GO:0098796	membrane protein complex	3	3/926	35/13588	1.26	0.430055	0.999977	Solyc01g060070.3/Solyc01g095670.4/Solyc03g120260.4	Solyc01g060070.3;Solyc01g095670.4;Solyc03g120260.4
GO:0000124	SAGA complex	1	1/926	8/13588	1.83	0.431529	0.999977	Solyc02g093490.3	Solyc02g093490.3
GO:0005778	peroxisomal membrane	1	1/926	8/13588	1.83	0.431529	0.999977	Solyc03g114330.3	Solyc03g114330.3
GO:0005813	centrosome	1	1/926	8/13588	1.83	0.431529	0.999977	Solyc09g075470.2	Solyc09g075470.2
GO:0030427	site of polarized growth	1	1/926	8/13588	1.83	0.431529	0.999977	Solyc07g056650.4	Solyc07g056650.4
GO:0030658	transport vesicle membrane	1	1/926	8/13588	1.83	0.431529	0.999977	Solyc10g009170.2	Solyc10g009170.2
GO:0030659	cytoplasmic vesicle membrane	1	1/926	8/13588	1.83	0.431529	0.999977	Solyc03g120260.4	Solyc03g120260.4
GO:0005667	transcription factor complex	2	2/926	22/13588	1.33	0.447933	0.999977	Solyc04g081350.3/Solyc06g074010.3	Solyc04g081350.3;Solyc06g074010.3
GO:0005758	mitochondrial intermembrane space	1	1/926	9/13588	1.63	0.470292	0.999977	Solyc07g063160.2	Solyc07g063160.2
GO:0009528	plastid inner membrane	1	1/926	9/13588	1.63	0.470292	0.999977	Solyc08g082870.3	Solyc08g082870.3
GO:0030687	preribosome, large subunit precursor	1	1/926	9/13588	1.63	0.470292	0.999977	Solyc08g006470.4	Solyc08g006470.4
GO:0030915	Smc5-Smc6 complex	1	1/926	9/13588	1.63	0.470292	0.999977	Solyc10g078730.2	Solyc10g078730.2
GO:0031305	integral component of mitochondrial inner membrane	1	1/926	9/13588	1.63	0.470292	0.999977	Solyc01g060070.3	Solyc01g060070.3
GO:0044432	endoplasmic reticulum part	2	2/926	23/13588	1.28	0.471162	0.999977	Solyc01g107250.3/Solyc03g098460.3	Solyc01g107250.3;Solyc03g098460.3
GO:0009941	chloroplast envelope	6	6/926	82/13588	1.07	0.489928	0.999977	Solyc01g060070.3/Solyc01g095670.4/Solyc08g080090.3/Solyc08g082870.3/Solyc09g098090.4/Solyc12g019740.2	Solyc01g060070.3;Solyc01g095670.4;Solyc08g080090.3;Solyc08g082870.3;Solyc09g098090.4;Solyc12g019740.2
GO:0043231	intracellular membrane-bounded organelle	97	97/926	1415/13588	1.01	0.491812	0.999977	Solyc01g007267.1/Solyc01g044558.1/Solyc01g060070.3/Solyc01g087050.3/Solyc01g088490.3/Solyc01g091420.2/Solyc01g095620.3/Solyc01g095670.4/Solyc01g096840.3/Solyc01g107250.3/Solyc02g062670.3/Solyc02g069500.1/Solyc02g070210.3/Solyc02g072010.3/Solyc02g078410.1/Solyc02g080610.4/Solyc02g083835.1/Solyc02g085650.4/Solyc02g092570.1/Solyc02g093910.3/Solyc03g019660.4/Solyc03g063140.4/Solyc03g083210.3/Solyc03g…	Solyc01g007267.1;Solyc01g044558.1;Solyc01g060070.3;Solyc01g087050.3;Solyc01g088490.3;Solyc01g091420.2;Solyc01g095620.3;Solyc01g095670.4;Solyc01g096840.3;Solyc01g107250.3;Solyc02g062670.3;Solyc02g069500.1;Solyc02g070210.3;Solyc02g072010.3;Solyc02g078410.1;Solyc02g080610.4;Solyc02g083835.1;Solyc02g085650.4;Solyc02g092570.1;Solyc02g093910.3;Solyc03g019660.4;Solyc03g063140.4;Solyc03g083210.3;Solyc03g…
GO:0009506	plasmodesma	9	9/926	127/13588	1.04	0.501614	0.999977	Solyc01g010150.3/Solyc01g112000.4/Solyc02g071830.3/Solyc03g118200.4/Solyc03g119980.3/Solyc05g013300.1/Solyc05g013320.1/Solyc07g065090.2/Solyc09g014480.3	Solyc01g010150.3;Solyc01g112000.4;Solyc02g071830.3;Solyc03g118200.4;Solyc03g119980.3;Solyc05g013300.1;Solyc05g013320.1;Solyc07g065090.2;Solyc09g014480.3
GO:0012511	monolayer-surrounded lipid storage body	1	1/926	10/13588	1.47	0.506414	0.999977	Solyc03g119820.1	Solyc03g119820.1
GO:0030127	COPII vesicle coat	1	1/926	10/13588	1.47	0.506414	0.999977	Solyc01g080850.4	Solyc01g080850.4
GO:0031300	intrinsic component of organelle membrane	1	1/926	10/13588	1.47	0.506414	0.999977	Solyc01g060070.3	Solyc01g060070.3
GO:0031301	integral component of organelle membrane	1	1/926	10/13588	1.47	0.506414	0.999977	Solyc01g060070.3	Solyc01g060070.3
GO:0015934	large ribosomal subunit	4	4/926	56/13588	1.05	0.536059	0.999977	Solyc00g500047.1/Solyc08g006470.4/Solyc10g078660.2/Solyc10g083740.3	Solyc00g500047.1;Solyc08g006470.4;Solyc10g078660.2;Solyc10g083740.3
GO:0042579	microbody	2	2/926	26/13588	1.13	0.53716	0.999977	Solyc02g078410.1/Solyc08g080900.3	Solyc02g078410.1;Solyc08g080900.3
GO:0000148	1,3-beta-D-glucan synthase complex	1	1/926	11/13588	1.33	0.540076	0.999977	Solyc02g078230.2	Solyc02g078230.2
GO:0000307	cyclin-dependent protein kinase holoenzyme complex	1	1/926	11/13588	1.33	0.540076	0.999977	Solyc02g082820.3	Solyc02g082820.3
GO:0030131	clathrin adaptor complex	1	1/926	11/13588	1.33	0.540076	0.999977	Solyc04g026360.3	Solyc04g026360.3
GO:0005623	cell	122	122/926	1800/13588	0.99	0.542478	0.999977	Solyc01g005970.3/Solyc01g007267.1/Solyc01g044558.1/Solyc01g060070.3/Solyc01g087050.3/Solyc01g088490.3/Solyc01g091420.2/Solyc01g095670.4/Solyc01g096840.3/Solyc01g100370.3/Solyc01g107250.3/Solyc02g062670.3/Solyc02g069500.1/Solyc02g070210.3/Solyc02g071830.3/Solyc02g072010.3/Solyc02g078410.1/Solyc02g080230.3/Solyc02g080610.4/Solyc02g082690.3/Solyc02g083835.1/Solyc02g085650.4/Solyc02g090070.3/Solyc02g…	Solyc01g005970.3;Solyc01g007267.1;Solyc01g044558.1;Solyc01g060070.3;Solyc01g087050.3;Solyc01g088490.3;Solyc01g091420.2;Solyc01g095670.4;Solyc01g096840.3;Solyc01g100370.3;Solyc01g107250.3;Solyc02g062670.3;Solyc02g069500.1;Solyc02g070210.3;Solyc02g071830.3;Solyc02g072010.3;Solyc02g078410.1;Solyc02g080230.3;Solyc02g080610.4;Solyc02g082690.3;Solyc02g083835.1;Solyc02g085650.4;Solyc02g090070.3;Solyc02g…
GO:0044464	cell part	122	122/926	1800/13588	0.99	0.542478	0.999977	Solyc01g005970.3/Solyc01g007267.1/Solyc01g044558.1/Solyc01g060070.3/Solyc01g087050.3/Solyc01g088490.3/Solyc01g091420.2/Solyc01g095670.4/Solyc01g096840.3/Solyc01g100370.3/Solyc01g107250.3/Solyc02g062670.3/Solyc02g069500.1/Solyc02g070210.3/Solyc02g071830.3/Solyc02g072010.3/Solyc02g078410.1/Solyc02g080230.3/Solyc02g080610.4/Solyc02g082690.3/Solyc02g083835.1/Solyc02g085650.4/Solyc02g090070.3/Solyc02g…	Solyc01g005970.3;Solyc01g007267.1;Solyc01g044558.1;Solyc01g060070.3;Solyc01g087050.3;Solyc01g088490.3;Solyc01g091420.2;Solyc01g095670.4;Solyc01g096840.3;Solyc01g100370.3;Solyc01g107250.3;Solyc02g062670.3;Solyc02g069500.1;Solyc02g070210.3;Solyc02g071830.3;Solyc02g072010.3;Solyc02g078410.1;Solyc02g080230.3;Solyc02g080610.4;Solyc02g082690.3;Solyc02g083835.1;Solyc02g085650.4;Solyc02g090070.3;Solyc02g…
GO:0099513	polymeric cytoskeletal fiber	2	2/926	27/13588	1.09	0.557862	0.999977	Solyc01g096840.3/Solyc12g014130.2	Solyc01g096840.3;Solyc12g014130.2
GO:0016020	membrane	44	44/926	655/13588	0.99	0.563783	0.999977	Solyc01g060070.3/Solyc01g088490.3/Solyc01g095670.4/Solyc01g100370.3/Solyc01g107250.3/Solyc02g062670.3/Solyc02g070210.3/Solyc02g070870.4/Solyc02g071830.3/Solyc02g081890.4/Solyc02g082690.3/Solyc02g085650.4/Solyc02g090070.3/Solyc03g006050.4/Solyc03g043770.4/Solyc03g098460.3/Solyc03g115890.3/Solyc03g118200.4/Solyc03g119980.3/Solyc03g120260.4/Solyc04g009790.4/Solyc04g081870.4/Solyc05g008340.3/Solyc05g…	Solyc01g060070.3;Solyc01g088490.3;Solyc01g095670.4;Solyc01g100370.3;Solyc01g107250.3;Solyc02g062670.3;Solyc02g070210.3;Solyc02g070870.4;Solyc02g071830.3;Solyc02g081890.4;Solyc02g082690.3;Solyc02g085650.4;Solyc02g090070.3;Solyc03g006050.4;Solyc03g043770.4;Solyc03g098460.3;Solyc03g115890.3;Solyc03g118200.4;Solyc03g119980.3;Solyc03g120260.4;Solyc04g009790.4;Solyc04g081870.4;Solyc05g008340.3;Solyc05g…
GO:0009527	plastid outer membrane	1	1/926	12/13588	1.22	0.571445	0.999977	Solyc01g060070.3	Solyc01g060070.3
GO:0044435	plastid part	9	9/926	135/13588	0.98	0.576625	0.999977	Solyc01g060070.3/Solyc01g088490.3/Solyc01g095670.4/Solyc03g117590.3/Solyc06g068500.3/Solyc08g080090.3/Solyc08g082870.3/Solyc09g098090.4/Solyc12g019740.2	Solyc01g060070.3;Solyc01g088490.3;Solyc01g095670.4;Solyc03g117590.3;Solyc06g068500.3;Solyc08g080090.3;Solyc08g082870.3;Solyc09g098090.4;Solyc12g019740.2
GO:0005783	endoplasmic reticulum	9	9/926	136/13588	0.97	0.585654	0.999977	Solyc01g107250.3/Solyc02g080610.4/Solyc03g098460.3/Solyc03g119980.3/Solyc04g082390.3/Solyc08g007340.3/Solyc08g065320.3/Solyc11g020330.1/Solyc12g099310.2	Solyc01g107250.3;Solyc02g080610.4;Solyc03g098460.3;Solyc03g119980.3;Solyc04g082390.3;Solyc08g007340.3;Solyc08g065320.3;Solyc11g020330.1;Solyc12g099310.2
GO:0005576	extracellular region	22	22/926	332/13588	0.97	0.586805	0.999977	Solanum_lycopersicum_newGene_1690/Solyc01g095670.4/Solyc01g104860.3/Solyc01g106830.4/Solyc01g112000.4/Solyc02g080220.3/Solyc02g090450.3/Solyc02g092580.3/Solyc03g115890.3/Solyc03g116590.3/Solyc03g117750.3/Solyc04g071890.3/Solyc04g081870.4/Solyc05g005170.4/Solyc06g034360.2/Solyc08g005800.4/Solyc08g060970.4/Solyc08g069040.3/Solyc09g010860.4/Solyc10g008440.3/Solyc11g018772.1/Solyc11g018805.1	--;Solyc01g095670.4;Solyc01g104860.3;Solyc01g106830.4;Solyc01g112000.4;Solyc02g080220.3;Solyc02g090450.3;Solyc02g092580.3;Solyc03g115890.3;Solyc03g116590.3;Solyc03g117750.3;Solyc04g071890.3;Solyc04g081870.4;Solyc05g005170.4;Solyc06g034360.2;Solyc08g005800.4;Solyc08g060970.4;Solyc08g069040.3;Solyc09g010860.4;Solyc10g008440.3;Solyc11g018772.1;Solyc11g018805.1
GO:0000428	DNA-directed RNA polymerase complex	2	2/926	29/13588	1.01	0.597255	0.999977	Solyc03g083210.3/Solyc09g048970.3	Solyc03g083210.3;Solyc09g048970.3
GO:0061695	transferase complex, transferring phosphorus-containing groups	2	2/926	29/13588	1.01	0.597255	0.999977	Solyc03g083210.3/Solyc09g048970.3	Solyc03g083210.3;Solyc09g048970.3
GO:0005777	peroxisome	3	3/926	45/13588	0.98	0.600217	0.999977	Solyc02g078410.1/Solyc08g078390.4/Solyc08g080900.3	Solyc02g078410.1;Solyc08g078390.4;Solyc08g080900.3
GO:0043227	membrane-bounded organelle	94	94/926	1407/13588	0.98	0.600456	0.999977	Solyc01g007267.1/Solyc01g044558.1/Solyc01g060070.3/Solyc01g087050.3/Solyc01g088490.3/Solyc01g091420.2/Solyc01g095670.4/Solyc01g096840.3/Solyc01g107250.3/Solyc02g062670.3/Solyc02g069500.1/Solyc02g070210.3/Solyc02g072010.3/Solyc02g078410.1/Solyc02g080610.4/Solyc02g082690.3/Solyc02g083835.1/Solyc02g085650.4/Solyc02g092570.1/Solyc02g093910.3/Solyc03g019660.4/Solyc03g063140.4/Solyc03g083210.3/Solyc03g…	Solyc01g007267.1;Solyc01g044558.1;Solyc01g060070.3;Solyc01g087050.3;Solyc01g088490.3;Solyc01g091420.2;Solyc01g095670.4;Solyc01g096840.3;Solyc01g107250.3;Solyc02g062670.3;Solyc02g069500.1;Solyc02g070210.3;Solyc02g072010.3;Solyc02g078410.1;Solyc02g080610.4;Solyc02g082690.3;Solyc02g083835.1;Solyc02g085650.4;Solyc02g092570.1;Solyc02g093910.3;Solyc03g019660.4;Solyc03g063140.4;Solyc03g083210.3;Solyc03g…
GO:0005811	lipid droplet	1	1/926	13/13588	1.13	0.600676	0.999977	Solyc04g070980.4	Solyc04g070980.4
GO:0048046	apoplast	10	10/926	153/13588	0.96	0.601167	0.999977	Solyc01g081060.4/Solyc03g031800.3/Solyc03g098430.4/Solyc04g008210.2/Solyc07g041720.1/Solyc08g081790.3/Solyc10g055200.1/Solyc11g006730.1/Solyc12g017240.2/Solyc12g098603.1	Solyc01g081060.4;Solyc03g031800.3;Solyc03g098430.4;Solyc04g008210.2;Solyc07g041720.1;Solyc08g081790.3;Solyc10g055200.1;Solyc11g006730.1;Solyc12g017240.2;Solyc12g098603.1
GO:0044424	intracellular part	112	112/926	1676/13588	0.98	0.606741	0.999977	Solyc01g005970.3/Solyc01g007267.1/Solyc01g044558.1/Solyc01g060070.3/Solyc01g087050.3/Solyc01g088490.3/Solyc01g091420.2/Solyc01g095670.4/Solyc01g096840.3/Solyc01g107250.3/Solyc02g062670.3/Solyc02g069500.1/Solyc02g070210.3/Solyc02g071830.3/Solyc02g072010.3/Solyc02g078410.1/Solyc02g080230.3/Solyc02g080610.4/Solyc02g082690.3/Solyc02g083835.1/Solyc02g085650.4/Solyc02g092570.1/Solyc02g093910.3/Solyc03g…	Solyc01g005970.3;Solyc01g007267.1;Solyc01g044558.1;Solyc01g060070.3;Solyc01g087050.3;Solyc01g088490.3;Solyc01g091420.2;Solyc01g095670.4;Solyc01g096840.3;Solyc01g107250.3;Solyc02g062670.3;Solyc02g069500.1;Solyc02g070210.3;Solyc02g071830.3;Solyc02g072010.3;Solyc02g078410.1;Solyc02g080230.3;Solyc02g080610.4;Solyc02g082690.3;Solyc02g083835.1;Solyc02g085650.4;Solyc02g092570.1;Solyc02g093910.3;Solyc03g…
GO:0030054	cell junction	7	7/926	108/13588	0.95	0.609969	0.999977	Solyc01g010150.3/Solyc02g071830.3/Solyc03g118200.4/Solyc03g119980.3/Solyc07g049580.3/Solyc07g065090.2/Solyc09g014480.3	Solyc01g010150.3;Solyc02g071830.3;Solyc03g118200.4;Solyc03g119980.3;Solyc07g049580.3;Solyc07g065090.2;Solyc09g014480.3
GO:0005575	cellular_component	123	123/926	1842/13588	0.98	0.614741	0.999977	Solyc01g005970.3/Solyc01g007267.1/Solyc01g010150.3/Solyc01g044558.1/Solyc01g060070.3/Solyc01g087050.3/Solyc01g088490.3/Solyc01g091420.2/Solyc01g095670.4/Solyc01g096840.3/Solyc01g100370.3/Solyc01g107250.3/Solyc02g062670.3/Solyc02g069500.1/Solyc02g070210.3/Solyc02g071830.3/Solyc02g072010.3/Solyc02g078410.1/Solyc02g080230.3/Solyc02g080610.4/Solyc02g082690.3/Solyc02g083835.1/Solyc02g085650.4/Solyc02g…	Solyc01g005970.3;Solyc01g007267.1;Solyc01g010150.3;Solyc01g044558.1;Solyc01g060070.3;Solyc01g087050.3;Solyc01g088490.3;Solyc01g091420.2;Solyc01g095670.4;Solyc01g096840.3;Solyc01g100370.3;Solyc01g107250.3;Solyc02g062670.3;Solyc02g069500.1;Solyc02g070210.3;Solyc02g071830.3;Solyc02g072010.3;Solyc02g078410.1;Solyc02g080230.3;Solyc02g080610.4;Solyc02g082690.3;Solyc02g083835.1;Solyc02g085650.4;Solyc02g…
GO:0005768	endosome	3	3/926	46/13588	0.96	0.615304	0.999977	Solyc02g093910.3/Solyc04g080360.4/Solyc08g068150.4	Solyc02g093910.3;Solyc04g080360.4;Solyc08g068150.4
GO:0030880	RNA polymerase complex	2	2/926	30/13588	0.98	0.61594	0.999977	Solyc03g083210.3/Solyc09g048970.3	Solyc03g083210.3;Solyc09g048970.3
GO:0005886	plasma membrane	38	38/926	578/13588	0.96	0.617361	0.999977	Solyc01g005040.3/Solyc01g099870.3/Solyc01g100370.3/Solyc01g107250.3/Solyc02g062670.3/Solyc02g070210.3/Solyc02g071520.3/Solyc02g071830.3/Solyc02g082690.3/Solyc02g090070.3/Solyc02g091840.3/Solyc03g006050.4/Solyc03g043770.4/Solyc03g118200.4/Solyc03g119980.3/Solyc04g082040.3/Solyc05g013300.1/Solyc05g013320.1/Solyc05g054850.1/Solyc06g011350.3/Solyc06g072350.3/Solyc06g072620.4/Solyc06g073890.3/Solyc07g…	Solyc01g005040.3;Solyc01g099870.3;Solyc01g100370.3;Solyc01g107250.3;Solyc02g062670.3;Solyc02g070210.3;Solyc02g071520.3;Solyc02g071830.3;Solyc02g082690.3;Solyc02g090070.3;Solyc02g091840.3;Solyc03g006050.4;Solyc03g043770.4;Solyc03g118200.4;Solyc03g119980.3;Solyc04g082040.3;Solyc05g013300.1;Solyc05g013320.1;Solyc05g054850.1;Solyc06g011350.3;Solyc06g072350.3;Solyc06g072620.4;Solyc06g073890.3;Solyc07g…
GO:0005622	intracellular	112	112/926	1681/13588	0.98	0.620181	0.999977	Solyc01g005970.3/Solyc01g007267.1/Solyc01g044558.1/Solyc01g060070.3/Solyc01g087050.3/Solyc01g088490.3/Solyc01g091420.2/Solyc01g095670.4/Solyc01g096840.3/Solyc01g107250.3/Solyc02g062670.3/Solyc02g069500.1/Solyc02g070210.3/Solyc02g071830.3/Solyc02g072010.3/Solyc02g078410.1/Solyc02g080230.3/Solyc02g080610.4/Solyc02g082690.3/Solyc02g083835.1/Solyc02g085650.4/Solyc02g092570.1/Solyc02g093910.3/Solyc03g…	Solyc01g005970.3;Solyc01g007267.1;Solyc01g044558.1;Solyc01g060070.3;Solyc01g087050.3;Solyc01g088490.3;Solyc01g091420.2;Solyc01g095670.4;Solyc01g096840.3;Solyc01g107250.3;Solyc02g062670.3;Solyc02g069500.1;Solyc02g070210.3;Solyc02g071830.3;Solyc02g072010.3;Solyc02g078410.1;Solyc02g080230.3;Solyc02g080610.4;Solyc02g082690.3;Solyc02g083835.1;Solyc02g085650.4;Solyc02g092570.1;Solyc02g093910.3;Solyc03g…
GO:0043229	intracellular organelle	96	96/926	1446/13588	0.97	0.627292	0.999977	Solyc01g007267.1/Solyc01g044558.1/Solyc01g060070.3/Solyc01g087050.3/Solyc01g088490.3/Solyc01g091420.2/Solyc01g095670.4/Solyc01g096840.3/Solyc01g107250.3/Solyc02g062670.3/Solyc02g069500.1/Solyc02g070210.3/Solyc02g072010.3/Solyc02g078410.1/Solyc02g080610.4/Solyc02g082690.3/Solyc02g083835.1/Solyc02g085650.4/Solyc02g092570.1/Solyc02g093910.3/Solyc03g019660.4/Solyc03g063140.4/Solyc03g083210.3/Solyc03g…	Solyc01g007267.1;Solyc01g044558.1;Solyc01g060070.3;Solyc01g087050.3;Solyc01g088490.3;Solyc01g091420.2;Solyc01g095670.4;Solyc01g096840.3;Solyc01g107250.3;Solyc02g062670.3;Solyc02g069500.1;Solyc02g070210.3;Solyc02g072010.3;Solyc02g078410.1;Solyc02g080610.4;Solyc02g082690.3;Solyc02g083835.1;Solyc02g085650.4;Solyc02g092570.1;Solyc02g093910.3;Solyc03g019660.4;Solyc03g063140.4;Solyc03g083210.3;Solyc03g…
GO:0005744	mitochondrial inner membrane presequence translocase complex	1	1/926	14/13588	1.05	0.627915	0.999977	Solyc01g060070.3	Solyc01g060070.3
GO:0009705	plant-type vacuole membrane	1	1/926	14/13588	1.05	0.627915	0.999977	Solyc03g096820.4	Solyc03g096820.4
GO:0009707	chloroplast outer membrane	1	1/926	14/13588	1.05	0.627915	0.999977	Solyc01g060070.3	Solyc01g060070.3
GO:0048471	perinuclear region of cytoplasm	1	1/926	14/13588	1.05	0.627915	0.999977	Solyc02g080610.4	Solyc02g080610.4
GO:0031984	organelle subcompartment	5	5/926	79/13588	0.93	0.63259	0.999977	Solyc01g095670.4/Solyc01g107250.3/Solyc02g093910.3/Solyc03g098460.3/Solyc07g018230.2	Solyc01g095670.4;Solyc01g107250.3;Solyc02g093910.3;Solyc03g098460.3;Solyc07g018230.2
GO:0012505	endomembrane system	12	12/926	188/13588	0.94	0.6355	0.999977	Solyc01g107250.3/Solyc02g080610.4/Solyc02g082690.3/Solyc02g093910.3/Solyc03g098460.3/Solyc03g119980.3/Solyc03g120260.4/Solyc07g018230.2/Solyc07g049580.3/Solyc07g065090.2/Solyc09g014480.3/Solyc11g020330.1	Solyc01g107250.3;Solyc02g080610.4;Solyc02g082690.3;Solyc02g093910.3;Solyc03g098460.3;Solyc03g119980.3;Solyc03g120260.4;Solyc07g018230.2;Solyc07g049580.3;Solyc07g065090.2;Solyc09g014480.3;Solyc11g020330.1
GO:0043226	organelle	96	96/926	1452/13588	0.97	0.644145	0.999977	Solyc01g007267.1/Solyc01g044558.1/Solyc01g060070.3/Solyc01g087050.3/Solyc01g088490.3/Solyc01g091420.2/Solyc01g095670.4/Solyc01g096840.3/Solyc01g107250.3/Solyc02g062670.3/Solyc02g069500.1/Solyc02g070210.3/Solyc02g072010.3/Solyc02g078410.1/Solyc02g080610.4/Solyc02g082690.3/Solyc02g083835.1/Solyc02g085650.4/Solyc02g092570.1/Solyc02g093910.3/Solyc03g019660.4/Solyc03g063140.4/Solyc03g083210.3/Solyc03g…	Solyc01g007267.1;Solyc01g044558.1;Solyc01g060070.3;Solyc01g087050.3;Solyc01g088490.3;Solyc01g091420.2;Solyc01g095670.4;Solyc01g096840.3;Solyc01g107250.3;Solyc02g062670.3;Solyc02g069500.1;Solyc02g070210.3;Solyc02g072010.3;Solyc02g078410.1;Solyc02g080610.4;Solyc02g082690.3;Solyc02g083835.1;Solyc02g085650.4;Solyc02g092570.1;Solyc02g093910.3;Solyc03g019660.4;Solyc03g063140.4;Solyc03g083210.3;Solyc03g…
GO:0005815	microtubule organizing center	1	1/926	15/13588	0.98	0.653298	0.999977	Solyc09g075470.2	Solyc09g075470.2
GO:0055044	symplast	6	6/926	97/13588	0.91	0.655685	0.999977	Solyc01g010150.3/Solyc02g071830.3/Solyc03g118200.4/Solyc03g119980.3/Solyc07g065090.2/Solyc09g014480.3	Solyc01g010150.3;Solyc02g071830.3;Solyc03g118200.4;Solyc03g119980.3;Solyc07g065090.2;Solyc09g014480.3
GO:0031967	organelle envelope	7	7/926	113/13588	0.91	0.657552	0.999977	Solyc01g060070.3/Solyc01g088490.3/Solyc01g095670.4/Solyc08g080090.3/Solyc08g082870.3/Solyc09g098090.4/Solyc12g019740.2	Solyc01g060070.3;Solyc01g088490.3;Solyc01g095670.4;Solyc08g080090.3;Solyc08g082870.3;Solyc09g098090.4;Solyc12g019740.2
GO:0031975	envelope	7	7/926	113/13588	0.91	0.657552	0.999977	Solyc01g060070.3/Solyc01g088490.3/Solyc01g095670.4/Solyc08g080090.3/Solyc08g082870.3/Solyc09g098090.4/Solyc12g019740.2	Solyc01g060070.3;Solyc01g088490.3;Solyc01g095670.4;Solyc08g080090.3;Solyc08g082870.3;Solyc09g098090.4;Solyc12g019740.2
GO:0005794	Golgi apparatus	8	8/926	129/13588	0.91	0.659895	0.999977	Solyc02g093910.3/Solyc03g119980.3/Solyc03g120260.4/Solyc06g074370.3/Solyc07g018230.2/Solyc07g065090.2/Solyc08g065320.3/Solyc09g014480.3	Solyc02g093910.3;Solyc03g119980.3;Solyc03g120260.4;Solyc06g074370.3;Solyc07g018230.2;Solyc07g065090.2;Solyc08g065320.3;Solyc09g014480.3
GO:0031090	organelle membrane	7	7/926	114/13588	0.9	0.666637	0.999977	Solyc01g060070.3/Solyc01g088490.3/Solyc03g120260.4/Solyc07g045440.1/Solyc08g080090.3/Solyc08g082870.3/Solyc12g019740.2	Solyc01g060070.3;Solyc01g088490.3;Solyc03g120260.4;Solyc07g045440.1;Solyc08g080090.3;Solyc08g082870.3;Solyc12g019740.2
GO:0019005	SCF ubiquitin ligase complex	3	3/926	50/13588	0.88	0.671729	0.999977	Solyc02g093910.3/Solyc03g120320.1/Solyc07g008250.3	Solyc02g093910.3;Solyc03g120320.1;Solyc07g008250.3
GO:0044434	chloroplast part	8	8/926	131/13588	0.9	0.676767	0.999977	Solyc01g060070.3/Solyc01g095670.4/Solyc03g117590.3/Solyc06g068500.3/Solyc08g080090.3/Solyc08g082870.3/Solyc09g098090.4/Solyc12g019740.2	Solyc01g060070.3;Solyc01g095670.4;Solyc03g117590.3;Solyc06g068500.3;Solyc08g080090.3;Solyc08g082870.3;Solyc09g098090.4;Solyc12g019740.2
GO:0030684	preribosome	1	1/926	16/13588	0.92	0.676952	0.999977	Solyc08g006470.4	Solyc08g006470.4
GO:0031011	Ino80 complex	1	1/926	16/13588	0.92	0.676952	0.999977	Solyc07g032510.3	Solyc07g032510.3
GO:0030312	external encapsulating structure	3	3/926	51/13588	0.86	0.684845	0.999977	Solyc07g065090.2/Solyc09g014480.3/Solyc09g097780.2	Solyc07g065090.2;Solyc09g014480.3;Solyc09g097780.2
GO:0031968	organelle outer membrane	1	1/926	17/13588	0.86	0.698993	0.999977	Solyc01g060070.3	Solyc01g060070.3
GO:0019866	organelle inner membrane	2	2/926	35/13588	0.84	0.6994	0.999977	Solyc01g060070.3/Solyc08g082870.3	Solyc01g060070.3;Solyc08g082870.3
GO:0099080	supramolecular complex	2	2/926	35/13588	0.84	0.6994	0.999977	Solyc01g096840.3/Solyc12g014130.2	Solyc01g096840.3;Solyc12g014130.2
GO:0099081	supramolecular polymer	2	2/926	35/13588	0.84	0.6994	0.999977	Solyc01g096840.3/Solyc12g014130.2	Solyc01g096840.3;Solyc12g014130.2
GO:0099512	supramolecular fiber	2	2/926	35/13588	0.84	0.6994	0.999977	Solyc01g096840.3/Solyc12g014130.2	Solyc01g096840.3;Solyc12g014130.2
GO:0005911	cell-cell junction	6	6/926	102/13588	0.86	0.702883	0.999977	Solyc01g010150.3/Solyc02g071830.3/Solyc03g118200.4/Solyc03g119980.3/Solyc07g065090.2/Solyc09g014480.3	Solyc01g010150.3;Solyc02g071830.3;Solyc03g118200.4;Solyc03g119980.3;Solyc07g065090.2;Solyc09g014480.3
GO:0044455	mitochondrial membrane part	1	1/926	19/13588	0.77	0.73867	0.999977	Solyc01g060070.3	Solyc01g060070.3
GO:0098800	inner mitochondrial membrane protein complex	1	1/926	19/13588	0.77	0.73867	0.999977	Solyc01g060070.3	Solyc01g060070.3
GO:0015630	microtubule cytoskeleton	3	3/926	56/13588	0.79	0.74455	0.999977	Solyc01g096840.3/Solyc09g075470.2/Solyc12g014130.2	Solyc01g096840.3;Solyc09g075470.2;Solyc12g014130.2
GO:0044433	cytoplasmic vesicle part	1	1/926	20/13588	0.73	0.756505	0.999977	Solyc03g120260.4	Solyc03g120260.4
GO:0009532	plastid stroma	4	4/926	76/13588	0.77	0.770015	0.999977	Solyc03g117590.3/Solyc06g068500.3/Solyc08g080090.3/Solyc12g019740.2	Solyc03g117590.3;Solyc06g068500.3;Solyc08g080090.3;Solyc12g019740.2
GO:0098798	mitochondrial protein complex	1	1/926	22/13588	0.67	0.788608	0.999977	Solyc01g060070.3	Solyc01g060070.3
GO:0031966	mitochondrial membrane	2	2/926	43/13588	0.68	0.801215	0.999977	Solyc01g060070.3/Solyc05g051400.4	Solyc01g060070.3;Solyc05g051400.4
GO:0009654	photosystem II oxygen evolving complex	1	1/926	23/13588	0.64	0.803037	0.999977	Solyc12g094720.3	Solyc12g094720.3
GO:0080008	Cul4-RING E3 ubiquitin ligase complex	1	1/926	23/13588	0.64	0.803037	0.999977	Solyc09g031610.4	Solyc09g031610.4
GO:0019867	outer membrane	1	1/926	24/13588	0.61	0.816483	0.999977	Solyc01g060070.3	Solyc01g060070.3
GO:0044463	cell projection part	1	1/926	24/13588	0.61	0.816483	0.999977	Solyc07g056650.4	Solyc07g056650.4
GO:0120038	plasma membrane bounded cell projection part	1	1/926	24/13588	0.61	0.816483	0.999977	Solyc07g056650.4	Solyc07g056650.4
GO:0031226	intrinsic component of plasma membrane	1	1/926	25/13588	0.59	0.829011	0.999977	Solyc07g045440.1	Solyc07g045440.1
GO:0044436	thylakoid part	2	2/926	46/13588	0.64	0.830718	0.999977	Solyc01g095670.4/Solyc03g019660.4	Solyc01g095670.4;Solyc03g019660.4
GO:0098588	bounding membrane of organelle	3	3/926	66/13588	0.67	0.836646	0.999977	Solyc01g060070.3/Solyc03g120260.4/Solyc07g045440.1	Solyc01g060070.3;Solyc03g120260.4;Solyc07g045440.1
GO:0005643	nuclear pore	1	1/926	26/13588	0.56	0.840685	0.999977	Solyc01g150159.1	Solyc01g150159.1
GO:0044430	cytoskeletal part	3	3/926	67/13588	0.66	0.844061	0.999977	Solyc01g096840.3/Solyc09g075470.2/Solyc12g014130.2	Solyc01g096840.3;Solyc09g075470.2;Solyc12g014130.2
GO:0005730	nucleolus	5	5/926	105/13588	0.7	0.851136	0.999977	Solyc01g086690.2/Solyc04g016380.3/Solyc08g008160.4/Solyc10g078660.2/Solyc10g083740.3	Solyc01g086690.2;Solyc04g016380.3;Solyc08g008160.4;Solyc10g078660.2;Solyc10g083740.3
GO:0019898	extrinsic component of membrane	1	1/926	27/13588	0.54	0.851563	0.999977	Solyc12g094720.3	Solyc12g094720.3
GO:0044425	membrane part	6	6/926	124/13588	0.71	0.857057	0.999977	Solyc01g060070.3/Solyc01g095670.4/Solyc01g107250.3/Solyc03g098460.3/Solyc03g120260.4/Solyc07g045440.1	Solyc01g060070.3;Solyc01g095670.4;Solyc01g107250.3;Solyc03g098460.3;Solyc03g120260.4;Solyc07g045440.1
GO:0098805	whole membrane	3	3/926	69/13588	0.64	0.858018	0.999977	Solyc01g060070.3/Solyc03g120260.4/Solyc07g045440.1	Solyc01g060070.3;Solyc03g120260.4;Solyc07g045440.1
GO:0005829	cytosol	24	24/926	429/13588	0.82	0.869691	0.999977	Solyc02g062670.3/Solyc02g070210.3/Solyc03g116390.4/Solyc03g120320.1/Solyc04g007120.4/Solyc04g016380.3/Solyc04g058070.3/Solyc04g076210.3/Solyc05g005200.3/Solyc05g005250.3/Solyc05g007895.1/Solyc05g009170.3/Solyc05g010420.2/Solyc07g006500.3/Solyc07g049580.3/Solyc07g065680.3/Solyc08g006470.4/Solyc08g042100.3/Solyc08g082180.3/Solyc09g098090.4/Solyc10g078660.2/Solyc10g082020.2/Solyc10g083740.3/Solyc11g…	Solyc02g062670.3;Solyc02g070210.3;Solyc03g116390.4;Solyc03g120320.1;Solyc04g007120.4;Solyc04g016380.3;Solyc04g058070.3;Solyc04g076210.3;Solyc05g005200.3;Solyc05g005250.3;Solyc05g007895.1;Solyc05g009170.3;Solyc05g010420.2;Solyc07g006500.3;Solyc07g049580.3;Solyc07g065680.3;Solyc08g006470.4;Solyc08g042100.3;Solyc08g082180.3;Solyc09g098090.4;Solyc10g078660.2;Solyc10g082020.2;Solyc10g083740.3;Solyc11g…
GO:0031461	cullin-RING ubiquitin ligase complex	4	4/926	90/13588	0.65	0.870229	0.999977	Solyc01g005970.3/Solyc02g093910.3/Solyc03g120320.1/Solyc08g081840.3	Solyc01g005970.3;Solyc02g093910.3;Solyc03g120320.1;Solyc08g081840.3
GO:0009706	chloroplast inner membrane	1	1/926	29/13588	0.51	0.871144	0.999977	Solyc08g082870.3	Solyc08g082870.3
GO:0045261	proton-transporting ATP synthase complex, catalytic core F(1)	1	1/926	29/13588	0.51	0.871144	0.999977	Solyc12g005060.1	Solyc12g005060.1
GO:1990904	ribonucleoprotein complex	4	4/926	92/13588	0.64	0.880938	0.999977	Solyc05g009170.3/Solyc08g006470.4/Solyc10g078660.2/Solyc10g083740.3	Solyc05g009170.3;Solyc08g006470.4;Solyc10g078660.2;Solyc10g083740.3
GO:1990234	transferase complex	6	6/926	130/13588	0.68	0.885309	0.999977	Solyc01g005970.3/Solyc02g093910.3/Solyc03g083210.3/Solyc03g120320.1/Solyc08g081840.3/Solyc09g048970.3	Solyc01g005970.3;Solyc02g093910.3;Solyc03g083210.3;Solyc03g120320.1;Solyc08g081840.3;Solyc09g048970.3
GO:0005737	cytoplasm	97	97/926	1582/13588	0.9	0.886127	0.999977	Solyc01g005540.4/Solyc01g044558.1/Solyc01g060070.3/Solyc01g086640.2/Solyc01g088490.3/Solyc01g091330.4/Solyc01g095670.4/Solyc01g096840.3/Solyc01g098840.3/Solyc01g107250.3/Solyc02g062670.3/Solyc02g070210.3/Solyc02g071830.3/Solyc02g078410.1/Solyc02g080230.3/Solyc02g080610.4/Solyc02g082690.3/Solyc02g082820.3/Solyc02g083835.1/Solyc02g085640.4/Solyc02g085650.4/Solyc02g092260.3/Solyc02g093910.3/Solyc02g…	Solyc01g005540.4;Solyc01g044558.1;Solyc01g060070.3;Solyc01g086640.2;Solyc01g088490.3;Solyc01g091330.4;Solyc01g095670.4;Solyc01g096840.3;Solyc01g098840.3;Solyc01g107250.3;Solyc02g062670.3;Solyc02g070210.3;Solyc02g071830.3;Solyc02g078410.1;Solyc02g080230.3;Solyc02g080610.4;Solyc02g082690.3;Solyc02g082820.3;Solyc02g083835.1;Solyc02g085640.4;Solyc02g085650.4;Solyc02g092260.3;Solyc02g093910.3;Solyc02g…
GO:0005740	mitochondrial envelope	1	1/926	31/13588	0.47	0.888143	0.999977	Solyc01g060070.3	Solyc01g060070.3
GO:0005774	vacuolar membrane	2	2/926	54/13588	0.54	0.891018	0.999977	Solyc06g006110.3/Solyc07g045440.1	Solyc06g006110.3;Solyc07g045440.1
GO:0031224	intrinsic component of membrane	2	2/926	56/13588	0.52	0.902611	0.999977	Solyc01g060070.3/Solyc07g045440.1	Solyc01g060070.3;Solyc07g045440.1
GO:0042995	cell projection	1	1/926	33/13588	0.44	0.902903	0.999977	Solyc07g056650.4	Solyc07g056650.4
GO:0120025	plasma membrane bounded cell projection	1	1/926	33/13588	0.44	0.902903	0.999977	Solyc07g056650.4	Solyc07g056650.4
GO:0000151	ubiquitin ligase complex	4	4/926	98/13588	0.6	0.908579	0.999977	Solyc01g005970.3/Solyc02g093910.3/Solyc03g120320.1/Solyc08g081840.3	Solyc01g005970.3;Solyc02g093910.3;Solyc03g120320.1;Solyc08g081840.3
GO:0005887	integral component of plasma membrane	1	1/926	35/13588	0.42	0.915716	0.999977	Solyc07g006970.4	Solyc07g006970.4
GO:0044437	vacuolar part	1	1/926	35/13588	0.42	0.915716	0.999977	Solyc07g045440.1	Solyc07g045440.1
GO:0044429	mitochondrial part	1	1/926	38/13588	0.39	0.93184	0.999977	Solyc01g060070.3	Solyc01g060070.3
GO:0070469	respiratory chain	1	1/926	39/13588	0.38	0.936498	0.999977	Solyc11g042420.2	Solyc11g042420.2
GO:0055035	plastid thylakoid membrane	1	1/926	41/13588	0.36	0.944882	0.999977	Solyc01g095670.4	Solyc01g095670.4
GO:0031225	anchored component of membrane	1	1/926	42/13588	0.35	0.948649	0.999977	Solyc07g045440.1	Solyc07g045440.1
GO:0005743	mitochondrial inner membrane	3	3/926	90/13588	0.49	0.949987	0.999977	Solyc01g060070.3/Solyc02g065550.4/Solyc06g069410.3	Solyc01g060070.3;Solyc02g065550.4;Solyc06g069410.3
GO:0034357	photosynthetic membrane	1	1/926	44/13588	0.33	0.95543	0.999977	Solyc01g095670.4	Solyc01g095670.4
GO:0009536	plastid	18	18/926	376/13588	0.7	0.959851	0.999977	Solyc01g060070.3/Solyc01g088490.3/Solyc01g095670.4/Solyc02g062670.3/Solyc02g083835.1/Solyc03g019660.4/Solyc03g117590.3/Solyc04g010060.2/Solyc04g081530.1/Solyc06g068500.3/Solyc07g063850.3/Solyc08g023490.4/Solyc08g080090.3/Solyc08g082870.3/Solyc09g064910.1/Solyc09g098090.4/Solyc10g083740.3/Solyc12g019740.2	Solyc01g060070.3;Solyc01g088490.3;Solyc01g095670.4;Solyc02g062670.3;Solyc02g083835.1;Solyc03g019660.4;Solyc03g117590.3;Solyc04g010060.2;Solyc04g081530.1;Solyc06g068500.3;Solyc07g063850.3;Solyc08g023490.4;Solyc08g080090.3;Solyc08g082870.3;Solyc09g064910.1;Solyc09g098090.4;Solyc10g083740.3;Solyc12g019740.2
GO:0031976	plastid thylakoid	1	1/926	46/13588	0.32	0.961316	0.999977	Solyc01g095670.4	Solyc01g095670.4
GO:0044444	cytoplasmic part	48	48/926	884/13588	0.8	0.964054	0.999977	Solyc01g060070.3/Solyc01g088490.3/Solyc01g095670.4/Solyc01g107250.3/Solyc02g062670.3/Solyc02g070210.3/Solyc02g078410.1/Solyc02g080610.4/Solyc02g082690.3/Solyc02g083835.1/Solyc02g085650.4/Solyc02g093910.3/Solyc03g019660.4/Solyc03g098460.3/Solyc03g116390.4/Solyc03g117590.3/Solyc03g119980.3/Solyc03g120260.4/Solyc03g120320.1/Solyc04g010060.2/Solyc04g016380.3/Solyc04g056630.3/Solyc04g081530.1/Solyc05g…	Solyc01g060070.3;Solyc01g088490.3;Solyc01g095670.4;Solyc01g107250.3;Solyc02g062670.3;Solyc02g070210.3;Solyc02g078410.1;Solyc02g080610.4;Solyc02g082690.3;Solyc02g083835.1;Solyc02g085650.4;Solyc02g093910.3;Solyc03g019660.4;Solyc03g098460.3;Solyc03g116390.4;Solyc03g117590.3;Solyc03g119980.3;Solyc03g120260.4;Solyc03g120320.1;Solyc04g010060.2;Solyc04g016380.3;Solyc04g056630.3;Solyc04g081530.1;Solyc05g…
GO:0005773	vacuole	3	3/926	97/13588	0.45	0.965368	0.999977	Solyc04g056630.3/Solyc07g045440.1/Solyc12g005300.2	Solyc04g056630.3;Solyc07g045440.1;Solyc12g005300.2
GO:0005856	cytoskeleton	3	3/926	97/13588	0.45	0.965368	0.999977	Solyc01g096840.3/Solyc09g075470.2/Solyc12g014130.2	Solyc01g096840.3;Solyc09g075470.2;Solyc12g014130.2
GO:0044459	plasma membrane part	1	1/926	48/13588	0.31	0.966426	0.999977	Solyc07g045440.1	Solyc07g045440.1
GO:1902494	catalytic complex	6	6/926	163/13588	0.54	0.969897	0.999977	Solyc01g005970.3/Solyc02g093910.3/Solyc03g083210.3/Solyc03g120320.1/Solyc08g081840.3/Solyc09g048970.3	Solyc01g005970.3;Solyc02g093910.3;Solyc03g083210.3;Solyc03g120320.1;Solyc08g081840.3;Solyc09g048970.3
GO:0009522	photosystem I	1	1/926	53/13588	0.28	0.976441	0.999977	Solyc12g009200.2	Solyc12g009200.2
GO:0009523	photosystem II	1	1/926	54/13588	0.27	0.978053	0.999977	Solyc12g009200.2	Solyc12g009200.2
GO:0009534	chloroplast thylakoid	1	1/926	54/13588	0.27	0.978053	0.999977	Solyc01g095670.4	Solyc01g095670.4
GO:0009570	chloroplast stroma	4	4/926	130/13588	0.45	0.980201	0.999977	Solyc03g117590.3/Solyc06g068500.3/Solyc08g080090.3/Solyc12g019740.2	Solyc03g117590.3;Solyc06g068500.3;Solyc08g080090.3;Solyc12g019740.2
[truncated: 19 more rows]

## Sheet: Table S6
Supplementary Table S6. Enriched KEGG pathways in genes with different expression patterns between resistant and sus-ceptible lines
[truncated: 124 more rows]
