# Supplementary material
Source: MDPI journal article supplement (https://www.mdpi.com/2311-7524/9/2/242)
Supplement: s1 [file s1 › Supplementary Table S7.pdf]

**Table S7. Reported 28 susceptibility genes in different plant species**

| Susceptibility genes                 | Reference |
|--------------------------------------|-----------|
| BIK1                                 | [58]      |
| LOB                                  | [59-61]   |
| ADH1                                 | [74]      |
| BIR1                                 | [75]      |
| CAMTA3                               | [76]      |
| DMR6                                 | [77]      |
| DND1                                 | [78]      |
| EDR1                                 | [79]      |
| EIN3                                 | [80]      |
| EIL1                                 | [80]      |
| MKP1                                 | [81]      |
| PLP2                                 | [82]      |
| PMR5                                 | [83]      |
| PMR4                                 | [84]      |
| WRKY48                               | [51]      |
| KMD3                                 | [85]      |
| TaNCED_5BS, TaNCED_5DS               | [86]      |
| SAM-MT1, SAM-MT2                     | [87]      |
| HIPM                                 | [88]      |
| MeSWEET10a                           | [89]      |
| OsPIP;3                              | [90]      |
| OsImp $\alpha$ 1a, OsImp $\alpha$ 1b | [91]      |
| Osaba1                               | [92]      |
| LTP3                                 | [93]      |
| WAT1                                 | [94]      |
| Upa20                                | [95]      |
| CaMLO6                               | [96]      |
| GAD                                  | [97]      |
