# Supplementary material
Source: MDPI journal article supplement (https://www.mdpi.com/2311-7524/9/2/242)
Supplement: s1 [file s1 › Supplementary Table S8.xls]

## Sheet: fpkm
Supplementary Table S8. The fragments per kilobase per million (FPKM) values for each unigene
#ID	OH0-1	OH0-2	OH0-3	OH12-1	OH12-2	OH12-3	OH24-1	OH24-2	OH24-3	IBL0-1	IBL0-2	IBL0-3	IBL12-1	IBL12-2	IBL12-3	IBL24-1	IBL24-2	IBL24-3
Solyc03g091030.1	0	0	0	0	0	0	0	0.0332	0	0	0	0	0	0	0	0	0	0
Solyc02g014490.4	0	0	0	0.0143	0	0	0	0	0	0	0	0.0521	0	0	0.0177	0.0305	0	0
Solyc04g082040.3	17.1218	11.963	9.0757	10.8585	9.6942	11.361	5.7402	7.9518	8.3775	14.1468	21.4631	16.5684	6.5908	7.204	6.5641	4.1936	4.3353	3.0921
Solyc04g015340.3	6.063	8.01	8.1889	42.4269	35.7427	35.1265	15.4237	15.3867	16.6201	7.8963	9.8087	8.7624	49.1258	46.854	54.3238	21.9795	23.646	23.6776
Solyc09g018370.4	9.3012	10.8555	9.443	11.2714	11.9094	13.6549	9.0414	8.0261	9.9927	9.2286	8.652	8.4964	8.676	9.0842	8.188	8.3505	7.8775	7.0554
Solyc00g500312.1	0.025	0.049	0	0.0707	0.0405	0.0576	0.0739	0.3883	0.149	0.0349	0.0144	0	0	0.2962	0.0178	0.0231	0.0114	0.0402
Solyc01g109770.3	40.9076	47.3061	45.1238	42.8696	46.3637	43.4398	44.7497	47.4376	46.5098	34.5768	41.2125	39.8515	31.4562	33.4396	30.2075	35.3264	37.3255	38.9339
Solyc08g082750.3	21.7373	26.1591	23.2199	25.5985	24.1719	25.6288	29.2254	25.5862	25.1994	14.4252	14.9029	14.6629	15.9942	16.6328	16.6871	16.0371	17.532	15.6678
Solyc02g091193.1	0	0	0	0	0	0	0	0	0	0	0	0	0	0	0	0	0	0
Solyc03g025190.4	0	0.024	0.0635	0.116	0	0.0321	0.1509	0.1623	0.0185	6.6085	3.816	9.1557	3.2374	6.0592	8.1687	9.1522	7.8715	11.4742
Solyc00g047200.1	0.0837	0.1643	0	0.152	0.2285	0.2043	0.4843	0.4566	0.336	0.0646	0.2142	0	0	1.5416	0	0.1172	0.1813	0.1014
Solyc06g005290.3	2.9462	2.374	2.7572	6.8967	8.3089	8.2021	2.1408	2.4683	2.4551	2.2028	2.3407	2.6834	6.2825	4.6676	4.4658	2.5586	2.0448	1.9555
Solyc07g066120.3	28.7492	24.5896	24.7191	31.8918	32.9289	32.6263	34.3701	33.9958	32.4894	21.5075	17.4549	17.4886	31.2001	25.4031	31.1906	31.4704	28.464	29.7692
Solyc11g070020.3	2.2264	2.2535	2.4309	6.525	7.2652	7.3335	2.4119	3.507	3.1133	3.8021	4.1167	4.959	7.9733	5.9856	7.5647	4.4884	4.2443	4.9704
Solyc02g069850.3	32.5835	33.0285	30.9997	21.0282	22.3814	22.298	29.1132	26.2528	27.3095	36.9354	35.2908	44.2263	20.3579	20.5611	17.8794	24.97	27.1363	26.7637
Solyc03g119910.4	7.1681	2.9369	4.4227	1.9318	1.9592	1.9029	2.6005	3.1144	4.1759	2.3887	4.7782	3.221	0.763	2.135	1.5925	1.3344	1.2733	2.3213
Solyc10g007250.1	0	0	0	0	0	0	0	0	0	0	0	0	0	0	0	0	0	0
Solyc00g500004.1	0	0	0	0	0	0	0	0	0	0	0	0	0	0	0	0	0	0
Solyc09g089780.3	0	0.6985	0.633	0.2177	0.189	0.7103	0	0.0321	0.1185	0.0449	0.063	0.0319	0.0498	0.182	0	0.0523	0.0597	0
Solyc11g068550.1	8.9188	9.9596	7.5233	19.1457	22.5143	18.5058	9.1227	10.855	8.4104	6.3752	6.0613	8.2785	22.3619	23.6258	23.0396	9.9347	12.0614	9.2816
Solyc10g008230.3	0.867	1.6515	1.469	2.1298	2.6731	3.2678	0.7315	0.4974	0.793	1.5766	1.3758	1.5586	2.0462	2.04	2.2012	1.1353	0.7203	1.228
Solyc03g078810.4	0.0257	0.1787	0	0	0	0	0.0826	0	0.1263	0	0.0402	0.0788	0.0996	0	0.1776	0.145	0	0.348
Solyc11g009080.2	449.758	399.558	389.775	513.734	375.908	398.957	635.61	607.099	694.269	402.21	434.768	358.457	312.04	299.475	279.737	509.691	536.452	523.335
Solyc01g104800.2	0.0264	0	0.2415	0	0.0693	0	0	0.016	0	0.0151	0.2007	0.0945	0	0	0.0615	0.0656	0.0687	0.0931
Solyc01g111880.4	26.2315	42.3954	21.2089	31.7541	51.0715	48.6789	56.1891	57.6378	31.7748	6.7179	9.501	8.3058	4.9913	5.7691	3.213	4.2126	6.619	8.9013
Solyc07g005830.3	86.7099	87.2759	88.7723	121.611	98.5357	88.8025	101.278	91.3691	98.7163	115.194	98.9528	110.14	108.797	87.7476	86.3698	98.2672	74.6968	85.3122
Solyc09g061794.1	0.2982	0.3831	0.1604	0.2331	0.2436	0.4288	0.2274	0.1955	0.0776	0.4588	0.4754	0.5492	0.6483	0.5053	0.5003	0.6329	0.5457	0.6852
Solyc07g056613.1	0	0.1684	0	0	0	0	0	0	0	0	0	0	0	0	0	0	0	0
Solyc05g041770.3	0	0	0	0	0	0	0	0	0	0.0485	0	0.0257	0	0	0	0	0	0
Solyc11g030850.1	0	0	0	0	0	0	0	0	0	0	0	0	0	0	0	0	0	0
Solyc11g008180.1	0	0	0	0	0	0	0	0	0	0	0	0	0	0	0	0	0	0
Solyc12g088370.2	12.0523	10.9979	15.3697	7.4367	8.3199	10.5625	15.6496	13.1182	13.476	24.1995	16.049	19.6981	7.8325	7.0836	8.6818	13.7181	11.7441	10.5782
Solyc06g063430.2	0	0	0	0	0	0	0	0	0	0	0	0	0	0	0	0	0	0
Solyc11g027890.3	0	0	0	0	0	0	0	0	0	0	0	0	0	0	0	0	0	0
Solyc05g051200.1	14.7056	47.6803	54.4271	17.3149	56.2437	43.2802	18.7082	29.677	21.6182	27.4134	28.091	18.9933	10.138	8.5006	10.0715	16.9502	13.2337	11.7449
Solyc06g063420.4	7.2107	7.9181	6.0982	6.5428	10.2963	8.595	4.807	5.1658	5.3522	4.2524	4.1335	3.8094	4.9283	5.1239	4.5439	3.5593	3.0466	2.7925
Solyc02g032580.3	0	0	0	0	0	0	0	0	0	0	0	0	0	0	0	0	0	0
Solyc08g150106.1	0	0	0	0	0	0	0	0	0	0	0	0	0	0	0	0	0	0
Solyc01g088230.3	0.0943	0.2615	0.6138	0.0534	0.4519	0.5351	0.2323	0.1346	0.396	0	0	0.275	0	0	0	0.2922	0.2439	0.1031
Solyc02g014480.1	0	0	0	0	0	0	0	0	0	0	0	0	0	0	0	0	0	0.1408
Solyc10g038110.1	10.0976	6.8994	7.9683	13.84	17.1985	13.5692	6.7372	5.7637	8.4099	8.532	8.7173	9.6194	16.0481	16.1951	17.787	11.3222	13.1447	8.1969
Solyc09g014750.1	0	0	0	0	0	0	0	0	0	0	0	0	0	0	0	0	0	0.1224
Solyc06g053800.3	21.1633	24.7449	23.9263	14.0533	17.8895	15.7818	18.9502	22.4944	20.2287	22.4972	19.7317	21.556	9.8995	10.4961	11.9458	13.9313	12.5284	13.0239
Solyc07g026605.1	0	0	0	0	0	0	0	0	0	0	0	0	0	0	0	0	0	0
Solyc08g005980.3	16.2039	22.242	20.2314	32.8735	26.1629	26.369	19.266	19.3612	16.26	17.0453	16.0275	16.7362	15.6192	12.3066	13.387	10.7918	11.3897	11.1478
Solyc08g150138.1	14.0925	17.1754	15.9695	19.7322	25.176	21.0531	12.6861	13.9807	17.7796	16.8123	14.9106	17.8263	18.2568	16.4618	14.9439	14.9191	13.9781	15.3381
Solyc04g054529.1	0	0	0	0	0	0	0	0	0	0	0	0	0	0	0	0	0	0
Solyc09g055320.1	0.9958	2.393	1.4635	2.7266	1.8953	3.4894	2.1804	1.8741	2.8342	1.7188	0.4022	0	4.3532	1.8064	1.7067	3.5258	2.0627	1.7626
Solyc10g083070.1	0	0	0	0	0	0	0	0	0	0	0	0	0	0	0	0	0	0
Solyc05g011850.1	0.6983	0.5618	0.8753	0.2981	0.0322	0.4074	0.5476	0.0607	0.2048	0.3761	0.3631	1.0476	0.1176	0.2749	0.1462	0.2676	0.3038	0.1679
Solyc10g037910.3	0	0	0	0	0	0	0	0	0	0	0	0	0	0	0	0	0	0
Solyc08g062340.3	25.662	9.6768	20.4935	0.1678	0.4039	0.1214	3.2927	1.0329	3.7403	72.8221	70.4913	121.382	0.6926	0.4641	0.8368	32.6067	26.9552	48.8708
Solyc09g018210.1	0	0	0	0	0	0	0	0	0	0	0	0	0	0	0	0	0	0
Solyc01g065570.2	0	0.0814	0	0.0288	0	0	0	0	0	0.0719	0	0	0	0.0481	0	0	0	0
Solyc11g008460.1	19.1075	24.5552	21.1046	48.0778	60.1839	56.5117	14.2224	16.7016	17.4407	12.4299	15.7629	12.6362	34.3338	32.5792	23.1323	13.7518	15.0411	13.8289
Solyc03g095310.3	0.9856	1.6553	1.9734	3.1811	1.4936	2.21	0.2015	0.5981	0.5101	0.9924	1.5102	1.8258	0.8963	1.0456	1.0362	0.585	0.5256	1.0024
Solyc10g084730.2	0.0397	0.3314	0	0.3597	0.1208	0.0774	0.1304	0.1776	0.1306	0.1836	0	0.5828	0	0.4884	0.2892	0.3298	0.3197	0.6158
Solyc05g025920.3	0	0	0	0	0	0	0	0	0	0	0	0	0	0	0	0	0	0
Solyc10g007620.3	0	0	0	0	0	0	0	0	0	0	0	0	0	0	0	0	0	0
Solyc01g080350.3	2.8023	2.6042	3.3835	6.3511	6.7165	7.2905	3.8492	3.7226	3.7744	3.3581	2.5729	3.1615	5.7998	7.6953	7.2585	4.0648	3.5249	4.3145
Solyc06g062910.2	4.4459	6.4611	4.7369	8.858	7.4659	6.6073	4.0346	5.2639	6.3306	3.7006	4.2621	5.1097	5.6754	3.2087	4.2735	4.248	3.5183	3.7435
Solyc11g008470.2	10.8994	12.4449	11.4115	25.5436	32.7424	30.2469	11.2098	10.2907	13.0935	8.2069	7.233	7.6152	17.9654	17.0874	14.1302	7.5154	9.0373	5.0676
Solyc07g015987.1	0	0	0	0	0	0	0	0	0	0	0	0	0	0	0	0	0	0
Solyc04g076900.2	10.4189	11.8201	9.8185	9.2667	11.2208	12.0882	6.8557	6.488	7.1851	7.4875	6.8188	4.6827	7.5058	6.6456	8.0696	6.1834	6.2335	7.146
Solyc08g080950.1	0	0	0	0	0	0.0296	0	0	0	0	0.0476	0	0	0	0	0	0	0
Solyc12g013490.1	0	0	0	0	0	0	0	0	0	0	0	0	0	0	0	0	0	0
Solyc04g051765.1	0	0	0	0	0.0695	0	0	0	0	0	0	0	0	0	0	0	0	0
Solyc07g042830.4	4.8254	5.147	6.7221	6.7112	8.5527	8.6115	4.3796	3.9191	5.2116	15.8255	8.45	13.3247	11.4951	9.1313	13.0543	10.8001	7.2965	8.3758
Solyc09g083040.1	0	0	0	0	0	0	0	0	0	0	0.1141	0	0	0	0	0	0	0
Solyc01g101015.1	7.2537	11.7768	7.0862	10.4609	13.2801	14.8491	5.2583	5.0834	4.3789	4.7699	6.0267	4.9224	11.1043	6.9717	7.4357	5.6702	8.0115	5.9909
Solyc11g017370.3	2.3641	3.0637	1.9329	8.3464	7.1521	6.5371	3.5501	2.8588	2.9654	2.8176	2.3677	3.2356	6.1825	6.0603	5.156	2.9526	2.6882	2.5659
Solyc04g028445.1	0.0182	0	0	0	0.0535	0.1744	0	0	0	0.0527	0	0	0.068	0	0	0.0355	0	0.1083
Solyc08g062290.4	1.2384	0.5978	1.8591	1.2679	0.7578	1.9832	0.8306	0.7847	0.9637	4.6152	6.0452	6.6474	3.7557	3.9238	3.4982	5.8304	4.8205	5.2089
Solyc04g076910.3	8.0182	11.9127	11.8678	12.8747	11.7445	12.0555	12.2383	11.1065	11.6279	8.7178	7.5892	7.2172	7.5072	8.0889	7.8549	6.863	7.5055	6.7338
Solyc02g043940.1	27.0951	24.1885	24.6393	14.6831	11.1321	13.6112	27.9015	23.045	22.3691	24.3378	20.7854	19.534	4.5282	9.8032	10.1775	16.1037	16.8041	16.5948
Solyc01g112140.4	0.9144	1.7709	1.6227	2.2802	1.9105	2.1975	1.0807	1.6966	1.706	1.6801	2.1757	1.7554	2.2831	1.7331	2.4496	1.3102	0.9938	0.9501
Solyc03g113110.1	0	0	0	0.0835	0.2308	0.1419	0	0	0	0	0	0	0.2511	0.3892	0.2998	0	0.0755	0
Solyc01g091330.4	2.3278	2.7207	3.441	7.2268	5.8766	6.7799	10.0883	11.4958	13.6065	5.4046	3.8709	3.7872	16.1385	14.3624	13.9691	21.1785	19.605	17.5859
Solyc05g052330.3	0	0	0	0	0	0	0	0	0	0	0	0	0	0	0	0	0	0
Solyc05g050020.3	6.6624	8.329	7.4014	7.894	10.0634	9.3649	5.5049	7.7615	6.6964	5.9898	6.1198	6.2706	4.9543	4.567	4.5848	3.9333	3.4413	3.486
Solyc03g032075.1	0	0	0	0	0	0	0	0	0	0	0	0	0	0	0	0	0	0
Solyc07g066600.3	154.223	159.971	196.707	144.706	139.146	157.608	167.834	175.264	192.842	278.431	251.363	287.689	227.592	214.039	241.08	268.47	253.631	263.771
Solyc12g010530.3	0	0	0	0	0	0	0	0	0	0	0	0	0	0	0	0	0	0
Solyc04g012110.2	0	0	0	0	0	0	0	0	0	0	0	0	0	0	0	0	0	0
Solyc03g112690.1	0	0.0406	0.0536	0	0	0.0561	0	0	0.0238	0	0.0182	0.1542	0	0	0	0	0	0
Solyc05g051990.3	10.5929	11.8155	11.8704	15.3391	15.0705	15.654	11.6648	9.4861	9.9863	12.1292	11.593	13.4376	16.5691	16.7032	17.6307	12.6576	13.1526	13.2545
Solyc02g080050.1	9.5745	11.314	12.5525	3.9703	5.7191	7.7158	0.3692	1.4191	0.9878	7.7109	5.4234	6.4294	0.6231	0.3827	0.5201	0.6521	0.7447	0.3308
Solyc02g014650.1	0	0.9255	0	0	0.5008	0	0.5974	0.1004	0.1889	0.1358	0.6252	0.2413	0	0	0	0.076	0.1913	0
Solyc09g061920.1	0	0	0	0	0	0	0	0	0	0	0	0	0	0	0	0	0	0
Solyc02g083030.1	0.1458	0.0158	0.205	0.253	0.1161	0.0592	0.2553	0.0878	0.0859	0.1393	0.1401	0.2952	0.1887	0.1437	0.154	0.0988	0.1558	0.2312
Solyc07g017570.2	0	0	0	0	0	0	0.0868	0.055	0	0	0.1726	0	0	0	0	0	0	0
Solyc06g030660.3	0	0	0	0	0	0	0	0	0	0	0	0	0	0	0	0	0	0
Solyc10g079370.3	12.4508	17.3327	17.2519	81.4928	112.483	99.7599	15.6612	19.2438	14.2586	10.4566	10.4292	10.8174	46.4779	34.3581	29.8118	11.5392	11.0076	14.6473
Solyc01g111480.1	0	0	0	0	0	0	0	0	0	0	0	0	0	0	0	0	0	0
Solyc05g041370.1	0	0	0	0	0	0	0	0	0	0	0	0	0	0	0	0	0	0
Solyc01g017535.1	0	0	0	0	0	0	0	0	0	0	0	0	0	0	0	0	0	0
Solyc02g085630.3	0	0	0	0	0	0.0295	0.2937	0.0418	0	0	0	0	0	0	0	0.0375	0	0.0455
Solyc11g009000.2	6.8555	7.5053	6.8376	8.0299	8.942	8.8949	8.2429	8.245	9.6372	5.771	5.9207	7.1984	11.4231	9.0385	9.7684	10.3107	8.8175	8.2985
Solyc06g071120.3	11.7342	13.7552	12.0117	14.819	16.5199	16.3691	12.5798	12.0577	14.0417	9.9841	10.0696	9.484	13.5754	11.8126	13.0199	12.4346	13.1717	10.9293
Solyc07g043560.4	8.1846	7.1757	8.2777	30.1029	33.0323	22.4563	20.7701	37.5583	40.567	13.5049	18.4836	28.3738	91.9526	97.6826	126.38	32.0282	46.1361	33.5349
Solyc03g079980.2	0.3842	0	0.9944	0	0.4212	0.6411	0.1373	0.2157	0.2798	0.2311	0.1789	0.0421	0.1852	0.1056	0.1681	0	0.0963	0.1387
Solyc12g027890.1	0	0	0	0	0	0	0	0	0	0	0	0	0	0	0	0	0	0
Solyc04g074560.1	23.2999	27.335	22.1427	22.7091	29.3641	24.2619	24.1182	21.1163	20.8684	22.2959	15.8763	26.108	13.9655	13.7824	12.5485	16.3339	18.5443	14.6594
Solyc04g009780.1	0	0.1224	0	0.0453	0.1105	0.2038	0	0	0	0	0	0	0	0	0	0.0452	0	0
Solyc11g150129.1	0	0	0	0.1121	0	0	0	0	0	0	0	0	0	0.1283	0	0	0	0
Solyc08g075390.4	8.6877	11.4321	11.3685	21.8464	21.303	21.7998	11.888	11.8091	12.2401	10.992	10.1609	10.2765	19.1747	17.7692	17.9262	11.2116	11.1268	10.4295
Solyc04g077460.3	2.3129	1.9723	1.4458	4.4603	4.9399	3.7372	4.5313	4.6167	4.4339	2.0606	2.6546	2.7102	6.3148	7.3936	7.8656	4.0959	5.5933	4.0103
Solyc09g011680.1	0	0	0	0	0	0	0	0	0	0	0	0	0	0	0	0	0	0
Solyc01g096090.4	16.6399	17.2602	19.9643	29.5229	27.2783	27.2468	18.7886	20.9802	21.2735	31.1114	24.9909	34.4412	32.633	28.7132	38.3361	29.412	24.1543	29.6104
Solyc12g038510.2	0	0	0	0	0	0	0	0	0	0	0	0	0	0	0	0	0	0
Solyc03g078310.1	0.3167	0.4127	0	0	0.0479	0.3648	0.2305	0	0	0	0.4978	0.2444	0.3042	0.4892	0.9028	0.183	0.4592	0.064
Solyc09g059500.3	12.4771	14.8448	13.1089	18.9903	20.7774	20.1919	14.6274	15.2733	16.1091	10.5421	9.9167	13.753	16.1848	17.2817	16.5865	10.9134	12.4004	10.4716
Solyc05g024170.1	0	0	0	0	0	0	0	0	0	0	0	0	0	0	0	0	0	0
Solyc04g014613.1	0	0	0	0.0983	0	0	0.0817	0.0732	0	0	0	0	0	0.0556	0	0.0937	0	0
Solyc01g102380.5.1	0	0	0.032	0.0264	0	0	0.0172	0	0	0.066	0	0	0	0	0	0	0	0
Solyc05g005350.3	0	0	0	0	0	0	0.0472	0	0.2002	0	0	0	0	0	0	0	0	0
Solyc04g056535.1	0	0	0	0	0	0	0	0	0	0	0	0	0	0	0	0	0	0
Solyc02g093430.3	18.7116	20.4412	23.8439	26.096	20.6049	21.6624	15.3063	21.0642	19.6525	20.0901	13.1588	15.1551	19.8384	17.3608	22.807	19.806	15.9525	13.5635
Solyc03g093740.1	0	0	0	0	0.0222	0	0.1423	0	0	0	0	0	0	0	0	0	0	0
Solyc02g069600.3	0.4793	0.4952	0.5254	0.3993	0.5572	0.7354	0.8121	0.6154	0.4879	0.1558	0.4102	0.5742	0.405	0.6266	0.2942	0.3592	0.7495	0.6925
Solyc08g079760.4	2.0482	1.7159	2.7898	3.2996	5.5005	4.8027	2.9285	4.271	4.532	1.3694	1.9079	1.3009	2.5674	1.7988	1.7949	2.1887	1.6695	1.7767
Solyc01g087620.3	133.296	189.263	142.453	93.1867	124.987	130.568	62.1348	83.7709	77.3566	145.806	129.155	131.687	95.1102	85.6587	95.108	78.6849	59.0381	64.9185
Solyc09g072750.2	88.0265	48.5313	58.5087	159.357	99.099	37.6014	149.319	130.78	108.695	53.4442	103.543	68.9341	68.8057	110.128	133.107	64.1518	105.068	96.0042
Solyc11g006190.3	21.7756	23.2374	18.6476	48.187	47.9469	51.2745	22.6277	24.8585	24.4025	19.2938	15.6732	17.7064	37.7247	33.1456	35.4784	17.5794	18.7551	15.5109
Solyc07g047710.3	12.4722	11.0675	10.3055	12.1609	11.6259	10.0383	22.8342	15.8973	17.266	27.9378	24.7195	30.8321	16.4577	13.8867	13.8647	18.8832	17.6005	18.9881
Solyc03g013140.1	0	0	0	0	0	0	0	0	0	0	0	0	0	0	0	0	0	0
Solyc02g092040.1	6.8712	4.8937	6.7579	4.4585	2.0159	4.5795	7.6	6.812	4.2902	7.6241	7.6845	6.0126	10.2833	11.1305	10.5601	7.8957	8.5791	7.4916
Solyc07g054580.3	4.9998	2.1027	1.6264	5.8855	4.4165	3.5026	8.8955	4.7964	2.8609	3.0082	4.5603	4.1119	4.8225	3.4636	7.4442	3.6856	8.0207	13.3721
Solyc01g038232.1	0	0	0	0	0	0	0	0	0	0	0	0	0	0	0	0	0	0
Solyc09g009570.3	0	0	0	0	0	0	0	0.045	0	0.036	0	0	0	0	0	0	0	0
Solanum_lycopersicum_newGene_2472	1.262	0.6894	1.9177	0.184	0.167	0.1557	0.8213	0.6978	0.5878	0.7738	1.0729	0.2229	0.0811	0.1058	0.1102	0.9014	0.6609	0.3606
Solyc07g056390.4	1.8222	1.8017	2.0881	9.5854	10.826	9.1883	7.4668	12.99	11.5579	4.3367	6.1455	8.4659	25.3083	25.2755	29.9381	12.4785	13.6385	10.5396
Solanum_lycopersicum_newGene_2470	0.0348	0.0931	0.2807	0.1378	0.275	0.3111	0.2529	0.3449	0.3056	0.0991	0.3537	0.3009	0.2703	0.2897	0.4146	0.192	0.3654	0.2035
Solyc02g080420.4	13.3394	17.3226	15.3718	34.6861	37.0314	32.1865	10.429	11.0863	12.5886	13.0265	12.3984	13.3676	30.1756	30.5763	27.6041	11.0766	10.7266	9.1061
Solyc03g120510.1	23.1608	23.0908	19.1123	30.7307	31.8433	30.0787	17.4538	17.2407	17.5561	18.8344	13.059	17.4074	29.8071	18.8602	21.9844	16.2227	16.6272	13.3566
Solanum_lycopersicum_newGene_2475	0.1083	0.178	0.0299	0.0686	0.1535	0.0793	0.0222	0	0	0.6316	0.4671	0.2016	0.633	0.8771	0.7105	0.8097	0.6049	0.5408
Solyc10g055240.2	12.458	15.2712	18.4811	11.8685	12.0772	12.5566	8.2934	11.648	11.3236	13.5015	15.5496	12.6565	5.7067	7.1205	4.8009	4.8212	5.2596	5.1357
Solanum_lycopersicum_newGene_2478	2.0476	3.0717	3.4177	1.9021	2.5585	2.8818	1.6463	1.9792	2.365	3.6319	2.8305	2.5972	2.125	1.815	2.1871	4.3075	2.6023	2.8625
Solyc03g118950.3	0	0	0	0	0	0	0	0	0	0	0	0	0	0	0	0	0	0
Solyc10g044830.1	0	0	0	0	0	0	0	0	0	0	0	0	0	0	0	0	0	0
Solyc11g150133.1	0	0	0	0	0	0	0	0	0	0	0	0	0	0	0	0	0	0
Solyc05g017900.3	2.5468	2.5303	2.5435	6.805	7.8837	8.9016	3.1756	3.0715	3.2982	2.0293	2.8466	2.2966	8.7332	8.3157	7.3289	3.196	3.1769	2.9961
Solyc11g022465.1	0	0	0	0	0	0	0	0	0	0	0	0	0	0	0	0	0	0
Solyc11g071640.3	8.6287	5.6735	7.8347	44.975	33.694	29.4176	10.3749	7.0968	6.7583	14.059	14.443	18.5814	57.233	85.2637	78.4888	21.8688	22.1296	25.8118
Solanum_lycopersicum_newGene_1436	0	0	0	0.2099	0	0	0	0	0	0	0	0	0	0	0	0	0	0
Solyc02g071300.1	0.4967	0.4094	0.2928	0.8858	0.9125	0.8089	0.272	0.5041	0.3678	0.2226	0.1602	0.0856	0.5028	0.2005	0.408	0.1756	0.1007	0.0216
Solyc05g005190.3	53.5124	54.0659	62.432	113.686	89.6555	91.6344	78.1007	80.9666	80.3111	70.8114	74.0776	86.5094	130.486	119.448	143.733	75.6413	91.3986	86.0588
Solyc00g500116.1	0.0348	0	0	0.0067	0.0178	0	0	0.038	0.016	0.006	0.0229	0.0074	0	0.0158	0	0	0.0167	0
Solyc12g150119.1	0	0	0	0	0	0	0	0	0	0	0	0	0	0	0	0	0	0
Solyc07g040880.4	0.1515	0.4994	0	0.1456	0	0.0783	0	0.0428	0.032	0.1363	0	0	0	0	0	0	0.056	0
Solyc08g022080.4	33.3985	35.872	37.0267	50.3272	63.0834	62.5215	45.0639	47.3156	41.8583	28.1337	25.4178	22.9002	32.1255	31.8881	35.6948	27.783	25.2914	23.9729
Solyc09g018235.1	0	0	0	0	0	0	0	0	0	0	0	0	0	0	0	0	0	0
Solyc10g085100.2	25.8055	24.7846	27.8422	44.0596	30.9975	31.4	41.0746	36.0967	37.8334	33.1086	26.1646	31.7128	43.4302	42.311	50.4083	29.9257	29.5667	28.5665
Solyc08g077970.2	3.3202	4.6164	2.7089	2.2192	4.1427	3.3686	4.0523	4.4243	3.2541	3.2721	3.2574	2.8927	2.3528	1.7767	1.4161	2.0404	2.0004	2.7143
Solyc11g006390.2	13.9847	16.4745	15.6548	15.8655	18.2679	18.2283	14.5191	13.0206	13.3547	10.4886	11.1702	9.5829	9.4024	8.4997	8.6636	7.947	8.341	7.0971
Solyc02g072400.1	0.4594	0.4223	0.439	0.5629	0.9456	0.5069	0.0305	0.0822	0	0.0834	0.1562	0.1472	0.1179	0.2154	0.1523	0.0752	0.0597	0.0708
Solyc10g005510.3	3.047	2.8282	3.6566	9.3042	5.2512	7.4884	5.3549	4.3914	6.2354	6.2704	9.9422	11.633	12.8963	22.7357	26.6592	10.1676	14.6186	13.548
Solyc03g083275.1	0	0	0	0	0	0	0	0	0	0	0	0	0	0	0.0776	0	0	0
Solyc00g022100.1	0.3257	0.7693	0.8416	1.8773	1.5039	1.5624	1.4048	1.4128	1.1873	0.2244	0.3163	0.2073	0.5432	4.0529	0.6887	0.576	1.1479	2.2102
Solyc07g017903.1	0	0	0	0	0	0	0	0	0	0	0	0	0	0	0	0	0	0
Solyc12g008860.3	9.6976	10.2128	11.2603	19.3654	19.3712	22.4192	13.3484	11.9201	13.6037	13.0749	13.9751	16.253	25.9861	20.4824	25.5693	15.1377	14.7763	17.308
Solyc05g026480.2	1.1019	1.1947	0.7186	2.8433	1.945	1.024	1.9869	1.8377	1.7256	1.7609	1.6407	2.2069	1.3969	2.0816	3.4374	1.7377	2.302	2.3391
Solyc04g005270.1	30.4625	30.7515	32.1867	51.8237	61.1491	52.4289	41.7285	43.9005	41.1015	19.6796	21.8617	20.8251	35.3709	29.8007	26.0689	23.278	26.7094	21.9766
Solyc06g068340.3	0.0222	0	0	0.0382	0.053	0.1082	0.0297	0.1083	0.2252	0	0.0898	0.1581	0	0.0873	0.024	0.0909	0.0237	0
Solyc05g053870.3	17.2494	17.0677	20.0349	15.3613	16.365	14.8275	15.5371	18.0091	16.0211	11.1033	13.0306	10.7669	10.7445	10.1259	11.4903	11.0038	11.664	10.8377
Solyc06g008150.3	3.3901	3.2764	3.3563	5.1433	5.8722	5.5554	4.223	3.5928	4.4257	3.9458	3.6566	3.195	5.231	4.831	4.9799	3.2097	3.6659	3.0324
Solyc04g054360.1	0.032	0	0	0.1108	0	0.0473	0.1636	0.2009	0	0.1711	0.0656	0	0	0.0547	0.1287	0.0819	0.0924	0
Solyc12g005600.1	0	0	0	0	0	0	0	0	0	0	0	0	0	0	0	0	0	0
Solyc10g054980.3	0	0	0	0	0	0	0	0	0	0	0	0	0	0	0	0	0	0
Solyc04g050445.1	0	0	0	0	0	0	0	0	0	0	0	0	0	0	0	0	0	0
Solyc12g040520.2	0	0	0	0	0	0	0	0	0	0	0	0	0	0	0	0	0	0
Solyc01g057117.1	0	0	0	0	0	0	0	0	0	0	0	0	0	0	0	0	0	0
Solyc12g038090.1	4.3645	8.451	5.1811	7.2275	9.1806	7.5593	5.2713	8.2473	4.3205	6.2394	5.9657	6.354	6.2636	7.1606	9.8095	8.8834	5.8946	7.7581
Solyc01g005720.3	1.1331	3.1542	6.6927	0.9468	0.809	1.2302	1.2001	0.4385	0.8298	2.444	0.93	1.4858	1.678	2.4377	1.4212	1.4995	2.6149	1.8418
Solyc03g006790.3	0	0	0	0	0	0	0	0.4475	0	0	0	0	0	0	0	0	0	0
Solyc07g051810.2	0	0	0	0.0464	0	0	0	0	0	0	0	0	0	0	0	0	0	0
Solyc10g084070.1	1.5644	1.6392	2.9692	1.8175	5.5453	7.7826	6.0487	1.7421	2.6714	1.6554	4.6658	4.0263	5.9105	9.0987	5.8416	5.6016	5.5052	6.1492
Solyc11g072700.2	0	0	0.0676	0	0	0	0.1288	0	0	0.0997	0	0	0	0	0	0.0171	0	0
Solyc03g111410.3	3.5146	3.9071	3.9845	4.9509	6.4281	7.3708	3.8141	3.5361	4.1223	2.9859	2.5458	3.0863	4.5404	4.1896	4.1239	3.4035	3.4172	3.5708
Solyc01g097010.3	39.3189	46.816	45.9766	45.8506	45.8108	42.149	43.1814	42.4302	42.2805	43.0233	41.3862	42.8265	32.5929	32.7769	34.0166	31.457	33.0912	28.3965
Solyc04g078810.4	7.586	5.4793	4.3582	11.8055	5.9825	5.6456	14.8114	8.8963	9.4797	4.9267	10.1184	7.2996	9.7619	12.3149	11.4699	6.8473	11.0417	11.3599
Solyc01g056240.1	0	0	0.1067	0	0	0	0.1593	0	0	0	0	0	0.0585	0.0506	0.0054	0	0	0.1643
Solyc01g079615.1	0	0	0	0	0	0	0	0	0	0	0	0	0	0	0	0.017	0	0
Solyc09g061530.2	0	0	0	0	0	0	0	0	0	0	0	0	0	0	0	0	0	0
Solyc04g025580.3	0	0	0	0	0	0	0	0	0	0	0	0	0	0	0	0	0	0
Solyc01g101160.2	18.0098	20.0727	18.978	20.2133	17.8722	19.1089	27.2141	20.7833	21.5188	14.9618	17.6504	14.7942	15.962	17.5625	16.1625	14.1888	17.4677	15.3376
Solyc03g026412.1	0	0	0	0	0	0	0	0	0	0	0	0	0	0	0	0	0	0
Solyc05g021390.4	0.0432	0	0	0.0823	0	0.4238	0.0596	0	0	0.0354	0.064	0	0.03	0.0303	0.0965	0.1593	0.0205	0.1103
Solyc07g042180.4	31.0872	30.959	35.1271	60.1397	65.7386	65.9162	41.1265	42.6891	43.8232	33.0185	30.9868	33.4083	51.2807	49.3274	47.0077	34.5047	36.1352	33.02
Solyc01g096490.3	10.2598	10.8738	9.4386	14.9694	15.3152	16.5944	11.9146	8.9018	11.6491	9.3598	8.6052	8.4365	11.2303	11.1965	10.7661	9.1016	10.1259	9.1369
Solyc01g097000.3	0.7841	0.6213	0.6677	19.9379	11.3845	12.0337	2.4297	1.6775	1.8994	1.6826	2.1398	2.5662	18.4727	18.4415	17.5973	3.2624	5.1538	4.002
Solyc03g013620.1	0	0	0	0	0	0	0	0	0	0	0	0	0	0	0	0	0	0
Solyc09g090960.4	115.982	102.404	97.5505	87.3804	69.7374	72.8147	131.423	123.1	109.563	139.251	150.785	165.164	104.932	94.458	117.473	138.28	147.309	180.844
Solyc09g008130.3	4.6181	4.5728	5.0925	8.5638	9.541	9.3404	6.8787	6.5885	5.7212	4.6755	3.92	4.3937	5.8891	5.4879	6.6279	4.7328	3.5025	2.8005
Solyc08g076120.3	8.1939	9.5592	6.6267	6.6934	8.0564	9.5307	8.1712	7.1046	7.3634	7.0147	6.7005	7.0303	8.7557	8.0795	9.4755	6.9413	6.7283	9.5656
Solyc02g071420.4	0	0	0	0	0	0	0	0	0	0	0	0.0623	0	0	0	0.0757	0	0.0229
Solyc01g057580.1	0	0	0	0	0	0	0	0	0	0	0	0	0	0	0	0	0	0
Solyc09g019990.1	0.211	0.1621	0	0	0	0	0	0	0	0.1072	0.0976	0.0765	0	0	0	0	0	0
Solyc08g081450.4	0.4592	0.4224	0.735	1.4658	0.5364	0.7589	2.4625	2.7284	2.7732	1.9718	5.3427	3.2716	4.0627	4.7695	3.6352	2.4534	3.2061	3.9862
Solyc01g007940.4	0	0	0	0	0	0	0	0	0	0	0	0	0	0	0	0	0	0
Solyc11g012923.1	0	0	0	0	0	0	0	0	0	0	0	0	0	0	0	0	0	0
Solyc10g074475.1	0	0	0	0	0	0	0	0	0	0	0	0	0	0	0	0	0	0
Solyc04g074865.1	0	0	0	0	0	0	0	0	0	0	0	0	0	0	0	0	0	0
Solyc05g013750.3	13.9355	27.5194	28.8947	17.3904	27.5811	29.2198	3.5352	7.8944	7.4606	15.9085	11.8843	10.8326	5.9049	5.1351	5.2422	3.2675	2.3609	2.4974
Solyc09g014950.2	0	0	0	0	0	0	0.0922	0	0	0	0	0	0	0	0	0	0	0
Solyc03g120960.1	0.197	0	0	0.378	0.1547	0.0282	0.3375	0.4262	0.0973	0.1817	0.0847	0.2455	0.2133	0.4101	0.4667	0.3945	0.3807	0.593
Solyc01g091650.3	17.863	21.4753	22.1038	24.8676	25.5056	22.8771	22.2372	21.0188	21.5823	24.3349	22.8919	23.2997	24.6456	25.0715	25.9659	22.7621	23.9494	21.9362
Solyc02g071380.2	142.734	167.723	143.734	3.0323	4.4775	3.4269	73.029	92.6003	83.778	58.8891	46.7225	29.5135	1.3192	1.0947	1.2636	23.0683	9.656	8.1156
Solyc03g005240.2	0	0	0	0	0	0	0	0	0	0	0	0	0	0	0	0	0	0
Solyc02g061720.3	0	0	0	0	0	0	0	0	0	0	0	0	0	0	0	0	0	0
Solyc05g056400.3	0.315	0.1255	0.5198	0.2808	0.769	1.443	0.2233	1.5397	0.6381	1.0921	3.5171	5.3073	3.7465	4.4328	12.0881	1.0725	1.2499	2.9058
Solyc01g104010.2	2.3881	2.7026	2.034	2.207	3.0583	2.4412	1.5381	2.4161	2.0205	1.3459	1.5096	1.4956	0.9874	1.5979	1.2701	1.2509	1.1282	1.6292
Solyc03g112860.3	6.6301	9.1984	8.1775	8.2931	8.1952	8.3046	7.9858	7.3209	6.0641	5.5658	8.0846	6.3141	6.9281	6.6252	7.82	4.9951	4.59	5.1186
Solyc07g007230.4	10.6521	12.723	11.7777	21.2919	26.6383	24.2738	13.5336	13.2886	12.7704	7.7146	9.3994	10.0475	17.1087	14.9447	14.8139	10.2035	9.7722	8.5893
Solyc07g017610.3	18.4063	26.6745	22.2939	15.5185	40.129	36.3703	18.3355	25.7096	19.842	12.9867	13.4038	7.2872	11.9549	14.0435	11.483	14.4018	10.3637	5.9488
Solyc02g093775.1	0	0	0	0	0	0	0	0	0	0	0	0	0	0	0	0	0	0
Solyc01g150142.1	0	0	0.1081	0	0.0901	0.0829	0.025	0.0776	0.0217	0.0959	0.0548	0.062	0	0	0	0	0	0
Solyc12g098540.2	0	0	0	0	0	0	0	0	0	0	0	0	0	0.0313	0.1004	0.0641	0.4277	0.2059
Solyc02g087970.1	0	0	0	0	0	0	0	0	0	0	0	0	0	0	0	0	0	0
Solyc09g066270.3	0	0	0	0	0	0	0	0	0	0	0	0	0	0	0	0	0	0
Solyc00g500079.1	4.3997	3.9636	3.5463	3.7542	3.0968	4.1031	4.1338	4.3717	3.6252	1.623	1.1985	0.9389	2.3919	2.9106	0.9262	2.0618	1.4501	1.4769
Solyc05g049890.1	0	0	0	0	0	0	0	0	0	0	0	0	0	0	0	0	0	0
Solyc01g094790.3	83.0234	106.258	102.992	87.8942	109.917	107.844	69.9048	58.7969	42.751	73.1105	82.3439	82.8091	59.2812	49.1886	45.8871	30.6385	24.6785	36.5678
Solyc09g083430.3	0	0	0	0	0	0	0	0	0	0	0	0	0	0	0	0	0	0
Solyc08g081690.3	10.0484	10.247	11.3209	4.218	4.1206	5.3226	8.4179	9.5154	9.4497	12.9695	12.1134	9.7693	5.1663	4.8041	5.024	9.4548	8.6165	6.1211
Solyc08g082470.1	3.0221	1.7634	2.5795	8.3998	6.8113	6.8713	4.0196	3.3861	4.0823	2.6755	1.7127	3.3232	6.9311	11.4646	6.2484	3.2589	2.9679	2.551
Solyc03g097130.3	16.582	14.1255	16.4484	20.6304	17.3415	17.6661	18.6681	15.2917	16.8893	22.3319	17.5185	20.6254	16.3526	15.2968	16.5412	15.7963	13.9335	15.7561
Solyc03g117920.1	0.0272	0.0446	0.0663	0.1367	0.1452	0.1939	0	0.1024	0.0349	0	0.0857	0.0806	0	0.0812	0.1716	0.0707	0.0747	0.3079
Solyc05g013090.3	0	0	0	0	0	0	0	0	0	0	0	0	0	0	0	0	0	0
Solyc04g008760.3	4.0079	5.5603	4.9764	6.9421	8.7776	9.4727	4.5587	4.7006	5.5415	7.4966	6.774	9.1469	19.2971	12.6474	15.691	10.4509	10.2199	8.5134
Solyc01g108680.4	0	0	0	0	0.026	0.029	0	0	0	0	0	0	0	0	0	0	0	0
Solyc03g113520.3	10.4148	8.2877	9.2189	2.961	3.26	5.235	3.8778	4.6194	3.9623	6.6248	7.1785	7.9809	2.059	1.5501	1.5962	4.4956	3.8049	4.1811
Solyc03g115550.3	5.9953	6.1255	6.8077	8.7587	9.2977	12.4159	6.0363	4.9155	5.7413	3.3389	4.3422	2.8415	8.3704	5.9948	6.3449	5.6053	4.7304	4.2325
Solyc03g044410.1	0	0	0	0	0	0	0	0	0	0	0	0	0	0	0.0346	0	0	0
Solyc03g120740.1	5.1281	11.4873	7.6611	9.3148	7.5521	7.5867	3.1083	3.659	4.3182	4.2969	6.2178	5.5485	7.0568	10.893	9.6386	2.4427	3.0799	2.4419
Solyc05g013080.1	0	0	0	0	0	0	0	0	0	0	0	0	0	0	0	0	0	0
Solyc02g150139.1	0.969	0.4425	0.9028	2.2628	3.2797	2.2276	1.4895	2.3916	1.132	0.829	0.5673	0.9291	0.9291	1.6618	1.0382	0.7654	0.9589	1.1328
Solyc03g119020.2	0	0	0	0	0	0	0	0	0	0	0	0	0	0	0	0	0	0
Solyc01g087050.3	0.5132	0.1979	0.0981	1.2842	0.7089	0.8539	1.7638	0.4634	0.0397	0.4307	0.3879	0.4833	0.8388	2.2035	0.6426	1.3776	1.7019	1.2282
Solyc07g006390.3	0	0	0	0	0	0	0	0	0	0	0	0	0	0	0	0	0	0
Solyc05g010550.1	0	0	0	0.0364	0	0	0	0	0	0	0	0.3904	0.0592	0	0	0	0	0
Solyc03g097670.4	6.0308	5.3562	6.195	10.1531	9.8253	9.7305	5.3182	4.9857	5.6011	9.8795	8.8564	9.5624	10.2339	10.8487	10.129	6.487	5.8722	6.6954
Solyc10g049850.3	19.0701	19.1073	22.4027	34.0175	37.4434	36.3129	18.8104	22.0827	23.067	20.8895	20.9621	22.174	34.6905	35.6628	36.8592	21.3977	20.3584	21.6733
Solanum_lycopersicum_newGene_3244	2.5649	0.8101	2.0904	0.4138	1.1078	0.7111	0.0582	2.9199	0.9388	4.704	3.9777	2.6853	4.5455	0	0	3.6342	0	0
Solyc01g056330.2	0	0	0	0	0	0	0	0	0	0	0	0	0	0	0	0	0	0
Solyc08g014175.1	0	0	0.1285	0	0	0	0	0.0357	0	0	0	0.1218	0.066	0	0.0636	0	0.085	0
Solyc03g005090.4	32.7618	36.3675	32.9916	34.8284	41.3807	38.4886	33.7896	38.1219	32.5145	23.1487	24.9989	20.8159	18.1583	17.1031	16.0915	18.9263	20.4764	17.3743
Solyc02g020920.1	0	0	0	0	0	0	0	0	0	0.0354	0	0	0	0	0	0	0	0
Solyc12g099025.1	104.091	120.509	103.641	91.5243	103.57	108.026	106.904	86.3273	87.2292	117.288	110.263	152.698	90.4361	92.6764	84.4505	102.001	96.1416	96.2707
Solyc12g039110.1	0	0	0	0	0	0	0	0	0	0	0	0	0	0	0	0	0	0
Solyc08g006070.4	12.3728	10.5211	12.1801	12.9854	8.0074	8.9293	14.276	14.5332	13.8508	18.5542	15.4494	18.702	11.1183	11.2087	12.8643	14.0315	14.3221	16.3966
Solyc12g006805.1	99.1655	95.1827	95.6688	13.8965	9.5368	10.3774	102.035	90.2971	89.7366	107.566	103.955	99.2779	24.2013	24.3815	29.5423	89.3941	83.8397	83.228
Solyc01g101010.4	6.9621	8.2662	8.1023	10.9323	17.3311	14.3961	6.0299	7.9624	7.8403	5.9886	4.6662	4.8702	7.9715	6.9983	6.7636	5.1465	4.6069	4.6981
Solyc03g006390.2	5.3681	4.8519	4.9556	5.229	5.1716	5.4226	2.984	3.5518	4.1586	3.5167	2.46	2.8664	2.9507	3.5691	3.1479	2.6366	2.9388	2.7596
Solyc01g079720.3	13.9379	14.6	16.2225	15.7094	18.9971	21.8305	12.4848	14.8951	14.427	11.59	10.4587	9.2583	11.2838	9.9983	10.2451	9.9244	7.5422	7.5289
Solyc02g067890.3	15.5231	14.1814	17.7632	37.1608	40.2	37.3398	16.6032	15.7586	17.633	15.534	14.1832	18.2066	34.6823	33.0573	32.8155	17.0993	17.5961	17.5425
Solyc10g055630.2	249.963	240.312	211.667	136.586	78.8233	72.61	305.814	230.807	196.293	172.009	235.589	200.339	68.3267	75.1673	58.3486	120.383	147.523	159.077
Solyc08g068660.1	0.0879	0.0965	0.148	0.1466	0.3721	0.3225	0.082	0.1009	0	0.1527	0.2887	0.0595	0	0.1823	0	0	0	0
Solyc04g051820.4	133.468	147.117	83.3211	18.1155	21.6903	18.7321	31.5839	44.8104	51.5839	81.4077	88.7716	85.9308	21.1425	17.404	17.6074	26.6676	23.6625	24.5376
Solyc02g090070.3	7.5755	6.9522	8.181	17.1684	11.2598	12.4698	11.8505	9.7188	7.6405	8.0621	10.0315	7.4716	23.7692	24.6812	23.0066	16.2926	18.0237	17.152
Solyc04g045565.1	0	0	0	0	0	0	0	0	0	0	0	0	0	0	0	0	0	0
Solyc12g038750.2	0	0	0	0	0	0	0	0	0	0	0	0	0	0	0	0	0	0
Solyc05g054530.1	1.9778	0.9548	1.4796	12.3097	10.9384	10.7999	5.159	2.3112	1.9727	2.6404	3.5886	2.5451	12.7868	14.5492	13.0259	4.6607	6.5222	5.9029
Solyc12g019690.2	4.7036	6.8845	5.0565	11.3509	13.3376	14.5074	5.5414	7.1633	8.8793	5.6541	4.3213	5.123	14.6178	13.5032	14.6559	9.0667	6.2658	7.1983
Solyc01g068380.3	2.7354	2.6666	2.7245	6.2102	8.5369	8.8946	1.4567	2.0753	2.2857	2.8687	3.0111	3.4557	4.5034	4.1003	4.2958	1.586	1.7204	1.4225
Solyc10g076770.1	0	0	0	0	0	0	0	0	0	0	0	0	0	0	0	0	0	0
Solyc03g116170.3	2.8954	3.8775	4.078	9.4627	7.7483	8.5857	5.3663	3.7202	5.3358	5.1655	7.0758	8.1794	8.3635	10.1501	7.9186	5.1678	6.372	3.6276
Solyc02g080580.1	1.4325	1.4756	0.7486	1.5102	1.1152	1.2979	1.4231	0.5701	0.521	1.335	1.5091	0.5032	1.201	0.9929	0.2883	0.8951	0.3751	0.6227
Solyc06g082990.4	9.2231	6.7513	7.8122	18.1342	19.756	18.136	14.831	20.1361	20.7408	6.3344	6.0985	7.2761	16.2189	15.7613	13.5247	16.3527	21.5982	19.1571
Solyc04g009220.2	0.1924	0.3584	0.3818	1.913	1.6349	1.6609	0.1146	0.2491	0.2394	0.2082	0.1955	0.0902	1.5047	1.5337	1.5083	0.3424	0.2166	0.56
Solyc06g073320.3	3214.21	3336.85	3410.09	377.81	337.565	335.209	2722.5	2614.03	3004.07	2274.82	2199.73	1557.62	217.335	188.316	183.326	1513.84	1618.37	1182.77
Solyc02g050240.4	18.095	20.4347	21.3639	24.7397	28.2053	28.5738	15.2093	17.8159	17.7286	17.8631	18.7738	15.5931	26.1359	24.161	24.1243	18.1502	16.4909	17.6978
Solyc02g084770.3	0.8268	0.9367	0.8308	2.2774	1.6816	1.7502	1.6724	1.0041	1.0946	1.2965	0.8506	0.9339	2.6933	2.1675	2.7326	1.4613	1.7228	1.7002
Solyc09g057950.3	0.1127	0.1164	0.2588	0.3401	0.2975	0.2428	0.4274	0.8544	0.4172	0.923	1.268	0.9594	1.0175	1.3064	0.9531	0.8944	0.9085	0.9175
Solyc01g106020.3	11.3631	12.401	11.2843	10.1401	8.2668	8.3113	9.6163	7.9416	10.375	13.0003	10.1295	12.4993	6.0327	7.3423	6.0598	7.2006	6.8361	6.1799
Solyc05g006240.4	10.7306	13.3724	11.0846	33.2811	40.6316	37.2767	12.1986	14.3062	12.2251	6.6309	8.5389	9.7025	22.1677	20.4752	19.3447	9.9847	7.3787	9.1375
Solyc04g054820.3	2.1074	4.4391	3.3472	3.5913	6.5346	5.6575	1.974	2.0335	1.7416	1.2704	1.59	1.1773	2.4773	3.1194	1.9921	1.3331	0.9731	1.118
Solyc10g080780.2	10.4853	10.085	8.2511	15.0623	13.4458	12.9976	13.0462	11.5446	12.3777	9.5204	9.0434	10.3659	13.2249	15.1251	13.1177	10.2883	10.9881	9.7226
Solyc04g075012.1	0	0	0	0	0	0	0	0	0	0	0	0	0	0	0	0	0	0
Solyc01g087420.4	12.444	11.5614	9.4156	14.9897	17.0824	16.3045	14.8406	12.3727	12.2953	6.8673	6.3859	6.7926	8.9618	8.7149	10.6663	6.6515	6.332	5.9439
Solyc04g051230.3	0	0	0	0	0	0	0	0	0	0	0	0	0	0	0	0	0	0
Solyc10g006700.1	34.2605	7.408	14.39	13.0236	15.8958	17.5294	6.8841	11.6055	15.7759	7.156	9.8257	8.8879	4.7582	4.0976	3.8617	4.0968	4.1468	4.7144
Solyc08g016770.4	0	0	0.014	0	0.0319	0	0.0598	0	0	0	0	0.053	0	0	0	0.1036	0	0.0722
Solyc08g005630.3	4.324	5.3572	4.3845	5.6158	4.1283	4.194	9.6339	8.4734	10.839	2.8039	5.1226	2.8409	7.5721	9.0248	7.8231	11.227	14.9948	11.2986
Solyc01g108830.3	0.5675	0.4384	0	0	0	0.0583	0.2795	0.0688	0	0	0.0295	0.0909	0.2317	0	0	0	0.0957	0
Solyc04g078360.1	0	0	0	0	0	0	0	0	0	0	0	0	0	0	0	0	0	0
Solyc08g075870.3	1.5289	5.9963	2.3752	11.7622	8.8232	6.8841	4.0814	2.9069	2.3967	2.8547	5.8104	5.4805	5.8932	9.0038	9.9433	4.5075	5.421	4.9892
Solyc11g008060.1	0.8073	2.004	1.2112	3.8804	4.0556	3.3292	2.2678	1.2056	2.4108	1.4373	1.7058	2.0061	5.266	4.8476	4.2495	2.3847	2.5357	3.0758
Solyc06g035580.3	0.9221	0.6626	0.6376	2.2372	0.4691	0.2292	2.2817	2.5483	2.0457	1.0567	2.0316	1.9383	1.4781	2.1942	1.6414	1.1388	3.4187	3.2925
Solyc06g036430.3	0.7859	1.0162	0.9991	5.1549	4.6617	3.6956	0.9185	1.1774	1.1332	1.9962	2.2502	2.048	3.9615	5.0735	5.1271	1.4232	2.7019	3.0534
Solyc09g091980.3	14.0103	14.4673	12.3014	19.3327	21.5304	24.0177	13.144	14.6144	15.1321	12.5259	12.5919	13.3177	11.7333	13.0854	10.7276	10.8282	12.3987	13.5493
Solyc08g006940.4	10.828	12.8774	12.6616	16.552	15.8919	14.8154	14.1768	12.4973	13.854	11.6116	11.3386	9.9231	12.9096	11.571	11.4245	10.284	11.6512	8.3225
Solyc01g020113.1	0	0	0	0	0	0	0	0	0	0	0	0	0	0	0	0	0	0
Solyc12g063010.3	0	0	0	0	0	0	0	0	0	0	0	0	0	0	0.0623	0	0	0
Solyc03g080140.3	18.3301	20.9056	18.9502	24.3615	28.2306	28.2755	15.7384	17.2297	17.7977	10.9168	11.8745	9.5622	15.9937	14.5156	14.2987	12.4409	10.0506	10.2597
Solyc10g055620.2	1.9494	1.9613	1.7681	4.6869	5.1328	4.9965	2.9764	3.9361	4.5933	2.5888	2.3769	2.915	3.946	3.2972	4.5659	3.6825	4.0914	4.0487
Solyc06g069010.3	58.0049	74.507	80.815	83.6924	95.8157	101.334	81.5079	69.2433	68.9254	109.937	106.781	143.743	83.1034	83.7203	79.8325	100.472	89.133	85.7451
Solyc02g061980.3	9.2848	9.988	8.9026	12.6221	14.1438	14.1561	11.7584	11.3413	11.3324	9.7588	9.2087	9.9607	15.2595	16.3666	14.9789	11.8126	11.9496	11.7394
Solyc07g062150.3	3.0767	2.216	2.6158	6.7416	6.8185	6.3308	2.0119	2.9405	3.2223	2.7606	2.6321	2.4853	4.3711	4.7906	4.3876	2.5613	2.6172	2.4506
Solyc09g017990.3	0	0	0	0	0	0	0	0	0	0	0	0	0	0	0	0	0	0
Solyc04g072043.1	0.0281	0	0.0752	0.2269	0.0804	0.1091	0.0414	0	0.0619	0.1832	0	0.2147	0.2935	0.1268	0.3077	0.0795	0.027	0.0436
Solyc03g118300.1	52.1831	59.4502	52.1888	61.4422	65.5729	58.624	64.7676	63.0983	66.0751	37.0935	45.0886	37.8228	32.7683	30.7645	20.6174	25.7151	25.0144	22.7794
Solyc08g015990.4	19.8069	19.2566	21.2024	30.8264	33.6131	31.4756	19.8197	23.8971	25.6732	20.3459	18.8486	20.6368	26.4458	23.7972	25.74	22.3132	18.32	21.1062
Solyc04g050250.1	0	0	0	0	0	0	0	0	0	0	0	0	0	0	0	0	0	0
Solyc08g066210.3	2.8476	3.0623	3.4032	4.0715	5.6248	6.7703	2.6744	3.1621	2.9246	1.9859	2.0939	1.6046	2.7656	3.391	2.3637	2.0939	1.4717	1.5461
Solyc02g068700.3	20.6048	20.0702	21.1756	22.7126	21.5614	21.6392	29.9375	28.6488	27.8744	41.7493	40.2909	44.8998	38.6106	40.2382	47.6943	41.6521	33.6749	42.7332
Solyc06g065750.1	0	0	0	0	0	0	0	0	0	0	0	0	0	0	0	0	0	0
Solyc12g056300.3	2.3747	1.5969	1.9435	5.3051	3.0321	3.6561	5.8633	4.9785	6.3689	2.4699	3.5257	3.2144	4.9875	6.306	6.1581	5.1781	5.7074	6.2794
Solyc12g015840.3	0.7359	0.4069	0.6582	0.6609	0.7712	0.7172	2.1999	1.1779	1.7939	0.3451	0.4375	0.2116	0.8465	0.4386	1.2364	0.7584	1	1.4015
Solyc02g070580.1	5.2513	5.5618	4.5577	10.8301	12.2051	12.7837	18.9853	10.7553	7.989	4.1605	5.1632	4.8566	24.8772	24.7373	24.1429	27.1041	29.5768	30.3362
Solyc07g005110.4	0	0.0442	0.0669	0.0699	0.0263	0.1522	0	0	0	0.2116	0.0335	0.1055	0	0	0.0561	0.0323	0	0.0572
Solyc06g083660.4	30.8648	24.4384	25.5153	22.0659	15.8135	14.3622	28.5885	30.8045	35.1638	26.3148	34.8818	31.9358	18.5718	20.5404	18.7404	31.4199	31.8374	31.5616
Solyc03g005010.4	18.0353	20.5368	18.9641	34.7342	27.8707	27.0723	20.3332	20.4784	16.618	18.3619	17.2503	20.2013	24.9274	22.0446	23.5646	16.1043	13.4603	16.4727
Solyc00g500124.1	0.0168	0.0734	0	0.3305	0.5635	0	0.0301	0.6691	0.4501	0.1039	0.0201	0.0327	0.1768	0.9173	0.0686	0.0379	0	0.2468
Solyc09g075620.3	0	0	0	0	0	0	0	0	0	0	0	0	0	0	0	0	0	0
Solyc09g007140.4	0.3503	0.4811	1.7214	1.7651	0.4216	1.073	2.2637	3.4077	1.7146	4.0576	7.6826	6.2488	3.6769	5.6006	3.641	3.9947	4.5001	3.5598
Solyc02g088920.4	3.9117	4.2527	4.2898	10.7689	15.3823	12.9323	4.6871	6.0954	3.9679	5.4247	5.7208	3.4841	12.0222	9.0145	10.7663	6.7798	6.4106	5.7627
Solyc01g066840.3	75.1852	84.8702	88.3463	76.6491	77.8323	83.171	83.2846	71.9528	81.3644	124.34	99.0255	137.929	73.6422	72.1317	66.7362	82.312	85.5133	86.6085
Solyc08g078900.1	49.9388	106.703	166.774	290.485	233.782	303.71	98.4384	80.397	86.6035	298.025	239.331	204.347	233.425	196.065	165.558	152.397	84.8821	105.592
Solyc04g008440.1	0	0	0	0	0	0	0	0	0	0	0	0	0	0	0	0	0	0
Solyc02g079720.1	0	0	0	0	0.1162	0	0	0	0	0.1331	0	0.1021	0	0	0	0	0	0
Solyc07g005100.4	6.0508	6.211	10.3656	5.8701	21.9777	24.25	5.1141	9.424	16.6801	13.5527	9.6901	4.8232	6.3603	16.7629	9.2658	25.1066	14.9314	8.3003
Solyc07g006790.3	25.482	25.9505	31.5215	32.07	34.387	38.1867	28.3498	26.6253	30.8561	37.3657	34.2527	41.6827	41.4258	43.5961	46.5773	41.8211	36.7054	38.5642
Solyc04g014995.1	0	0	0	0	0	0	0	0	0	0	0	0	0	0	0	0	0	0
Solyc02g082100.4	17.0101	14.8011	12.0456	6.9206	4.7657	5.5195	11.5081	11.4522	12.3427	10.4443	12.6414	9.6648	5.3238	5.4404	6.1254	9.2635	9.816	9.675
Solyc12g038875.1	0	0	0	0	0	0	0	0	0	0	0	0	0	0	0	0	0	0
Solyc12g013950.2	5.0618	6.2556	6.726	11.0027	12.3216	12.2594	5.6815	5.7441	5.491	4.808	4.6304	4.5906	7.5438	7.9761	7.7824	4.8509	4.3979	4.3516
Solyc11g069870.1	0	0	0.0478	0	0	0	0	0	0	0	0	0	0	0	0	0	0	0.0428
Solyc00g244280.1	0.0775	0.0125	0.1931	0	0	0	0.0056	0.2011	0	0.0169	0.0845	0.0191	0	0.1539	0.0034	0.0065	0	0.0549
Solyc05g010760.3	0	0	0	0	0	0	0	0	0	0	0	0	0	0	0	0	0	0
Solyc06g073800.3	57.2352	55.1866	62.1055	63.0068	70.3219	70.9131	69.9167	60.6144	60.7668	125.812	113.928	164.757	92.5456	89.12	96.378	94.5262	98.3924	114.532
Solyc10g039270.2	6.3148	4.8926	5.5715	31.1957	23.8454	22.9854	7.9993	7.947	7.5844	11.9126	10.5439	15.0006	35.3282	25.6671	32.2691	15.0509	10.0046	12.0947
Solyc02g094210.1	0.3137	0.8817	2.7107	0.9207	0.7418	1.6095	0.5595	4.0247	1.5105	4.5232	0.7563	1.1453	1.2098	1.7004	3.7304	0.4523	1.9529	1.045
Solyc01g090960.2	0	0	0	0	0	0	0	0	0	0	0	0	0	0	0	0	0	0
Solyc09g007055.1	0.7686	1.181	0	1.2695	2.3503	1.5444	0	0.4426	0.3776	0.2811	0.3756	0.3972	0	1.5001	1.6134	0.1405	0.0743	0
Solyc12g038425.1	0	0	0	0	0	0	0	0	0	0	0	0	0	0	0	0	0	0
Solyc09g098560.2	2.3945	2.7825	3.2643	2.8835	3.3183	2.8778	2.4238	3.3225	3.426	2.5008	2.0126	2.9302	1.9447	2.434	2.1909	2.0545	1.9114	2.7474
Solyc12g042625.1	0	0	0	0	0	0	0	0	0	0	0	0	0	0	0	0	0	0
Solyc06g073730.2	21.0557	35.6335	31.496	63.2396	72.3191	81.6721	18.1166	20.748	24.4337	22.9681	25.1193	24.2206	68.2647	74.5505	68.0825	23.3936	21.7519	18.7354
Solyc11g032090.3	0	0.0852	0	0.4202	0.2836	0.0922	0.2473	0.2342	0.0398	0	0	0.0198	0.1628	0.2365	0.1909	0.0797	0.0688	0.0205
Solyc07g064080.4	5.2751	5.3534	5.0211	8.9098	9.5355	9.662	7.0696	5.8831	7.9924	4.0593	5.3902	4.8786	9.9473	9.7834	9.12	6.4754	6.6439	6.4902
Solyc02g032830.3	0	0	0	0	0	0	0	0	0	0	0	0	0	0	0	0	0	0
Solyc07g062680.3	13.6251	10.2834	10.0101	20.5804	12.0299	13.8678	22.8638	13.7599	12.0835	9.2932	13.5473	12.6821	18.1744	16.3312	18.7509	13.513	17.1744	15.7652
Solyc09g011890.1	0	0	0	0	0	0	0	0	0	0	0	0	0	0	0	0	0	0
Solyc11g020730.1	1.5326	1.7383	1.765	5.548	5.6069	6.2301	4.2935	4.4779	2.8833	2.5909	2.28	2.5483	6.6	7.4522	6.9693	4.0699	2.9922	2.189
Solyc10g080930.2	12.8294	19.0159	20.9023	28.9342	30.5511	28.7129	17.3519	23.838	22.3946	11.881	17.1892	13.7538	16.8991	18.569	13.7693	14.5621	13.8567	13.2386
Solyc05g023842.1	0	0	0	0	0	0	0	0	0	0	0	0	0	0	0	0	0	0
Solyc07g053440.4	14.0135	15.4995	12.5159	16.9315	18.508	19.1514	12.5449	11.9725	12.4903	10.069	10.5327	10.108	16.4205	13.2999	12.0996	10.9074	10.9017	10.0611
Solyc03g123580.4	0.1897	0	0	0.4884	1.4659	0.2131	0	0.1867	0	0	0	0	0.0639	0	0	0	0	0
Solyc02g005560.1	0	0	0	0	0	0	0	0	0	0	0	0	0	0	0	0	0	0
Solyc02g070340.3	22.2042	23.762	24.6912	29.3342	33.8738	31.2668	26.1543	25.0481	24.6166	36.0621	31.644	43.1839	32.8293	31.2945	35.5947	32.7782	33.8884	34.2605
Solyc07g006850.3	1.4253	0.3121	0.4812	0	0	0	0.1369	0.1783	0.5205	0.2575	0.7654	0.6214	0.1071	0.151	0.2046	0.2562	0.2972	0.4769
Solyc01g095230.4	6.4691	4.5055	6.121	9.1022	7.9263	8.5004	6.256	6.6879	7.067	3.7041	3.935	4.2325	4.9459	4.1884	3.3671	4.0413	3.0802	4.6875
Solyc08g076810.4	2.5859	1.5852	2.8628	3.7226	3.5914	4.2957	2.5102	2.9366	2.9891	1.9231	1.8725	1.6878	3.2545	3.2166	2.8604	2.7538	2.7143	2.7276
Solyc06g082390.4	29.0727	33.3436	33.8355	58.7708	70.3652	59.6534	34.4644	46.3937	39.992	23.4148	21.4398	25.1015	35.3166	31.9217	27.7787	25.4928	23.2456	21.3549
Solyc06g060195.1	0	0	0	0	0	0	0	0	0	0	0	0	0	0	0	0	0	0
Solyc05g008800.4	4.4626	4.2895	6.4055	15.8029	14.5102	16.4497	5.5256	5.6223	6.3976	5.3617	4.1247	4.4928	16.6015	11.6631	16.7448	6.1156	4.8752	5.4317
Solyc03g083180.1	0.3764	0.1128	0.1865	0.5363	0.2281	0.6975	1.9395	0.2977	0.5544	0.3493	0.4443	1.0101	0.8378	1.0011	0.1938	0.0309	0.7892	0.0973
Solyc10g084530.1	20.43	21.081	24.6343	27.7155	22.246	28.7615	17.0703	14.9357	16.1608	13.6372	20.6838	16.1423	36.0807	34.9055	28.2178	23.1975	23.9336	30.4703
Solyc07g006840.1	0	0	0	0	0	0	0	0	0	0	0	0	0	0	0	0	0	0
Solyc02g086970.4	11.6041	14.4181	11.4043	16.1993	20.5295	19.231	12.5989	18.7089	11.5995	7.1908	4.1673	3.0691	9.7491	2.701	3.3305	6.8658	3.2656	3.2603
Solyc03g119290.3	10.0115	9.7206	8.2711	10.0407	10.3506	11.6279	9.2994	7.7494	9.5548	6.8301	7.1787	5.6511	10.342	11.5458	10.0849	8.2799	6.6102	7.7606
Solanum_lycopersicum_newGene_3568	0.1697	0.0882	0.4792	0.6629	0.8653	1.057	0.0817	0.1525	0.1434	0.1309	0	0.2152	0.4921	0.5334	0.3969	0.0971	0	0.08
Solyc03g112270.3	31.0272	31.0736	28.7321	57.5024	80.9939	77.5624	26.1255	33.6864	23.7822	17.6262	18.7527	18.1842	35.3132	24.9553	19.0883	15.7464	15.8674	13.7624
Solyc09g091330.1	0	0	0	0	0	0	0	0	0	0	0	0	0	0	0	0	0	0
Solyc05g051340.3	5.0981	4.6281	6.2671	7.6681	8.6666	8.1815	7.3011	7.1972	6.1928	4.3562	4.1204	4.4447	6.4056	5.4239	4.9416	5.2173	3.7407	4.1034
Solyc11g019940.1	0	0	0	0	0.0735	0	0	0	0	0	0	0	0	0	0	0	0	0
Solyc01g016700.3	0	0	0	0	0	0	0	0	0	0	0	0	0	0	0	0	0	0
Solyc05g007760.2	0.2552	0.0624	0.0325	0.2487	0.1727	0.2126	0.1414	0.0696	0.1313	0.1967	0.2365	0.2977	0.9884	0.6421	0.8477	0.4187	0.3288	0.3701
Solyc02g078440.3	6.2314	6.9269	7.5912	11.935	12.7757	13.5164	8.9778	9.2835	9.8942	6.747	6.8149	7.2105	9.9718	9.364	9.9515	8.0776	8.5796	8.8675
Solyc02g011970.1	0	0	0	0	0	0	0	0	0	0	0	0	0	0	0	0	0	0
Solyc07g044780.3	2.9219	3.4775	3.2542	5.5236	7.1278	6.4148	3.3807	3.5884	4.1961	2.238	2.1474	2.1481	5.5095	5.1296	5.6109	3.211	3.2059	3.2937
Solyc12g096000.2	57.9269	69.9383	71.4873	83.5234	94.9199	91.883	70.6306	69.1258	66.8197	53.5564	60.9156	59.9765	70.7271	76.8768	70.8196	58.985	60.1216	59.4152
Solyc05g021415.1	0	0	0	0	0	0	0	0	0	0	0	0	0	0	0	0	0	0
Solyc01g080970.3	0.0225	0	0	0	0	0	0	0	0	0	0	0	0	0	0	0	0	0
Solanum_lycopersicum_newGene_177	0	0	0	0	0	0	0	0	0	0	0	0	0	0	0	0	0	0
Solyc10g083350.2	29.9534	31.7934	33.1245	30.3429	23.3824	34.9203	21.9117	23.691	27.716	48.8404	38.9884	37.848	34.4087	22.9274	32.5686	31.5008	29.7249	29.0331
Solyc04g077000.3	0.7428	1.5909	1.1697	2.5977	3.9245	2.486	1.5825	1.1111	1.88	1.0472	0.9271	1.0488	1.9975	1.4923	1.0061	0.9286	0.5821	0.6184
Solyc11g008210.3	15.3473	16.5539	13.9128	15.3083	16.2764	18.0722	14.9338	14.4794	13.0023	10.6236	9.7906	10.3426	12.802	11.5217	10.0501	10.3342	10.8192	7.9733
Solyc07g054635.1	0	0	0	0	0	0	0	0	0	0	0	0	0	0	0	0	0	0
Solyc09g055427.1	0	0	0	0	0	0	0	0	0	0	0	0	0	0	0	0	0	0
Solyc02g093940.3	18.7039	17.2781	20.4701	19.9773	18.3294	17.6475	18.8626	22.81	19.7801	24.1165	17.2564	18.7594	11.7754	11.391	9.8787	12.9913	12.5383	11.0975
Solyc03g033340.3	7.0288	8.4	7.4221	13.6273	18.9753	18.6246	9.535	8.9958	9.421	5.8729	7.5127	5.7158	15.6956	15.511	16.1293	8.7948	10.1939	8.9609
Solyc10g007360.4	0.4507	0.2075	0.4497	1.2558	1.8238	2.2889	0.333	0.1909	0.3686	0.2922	0.0889	0.1807	1.2543	1.4018	1.5286	0.4128	0.1243	0.3575
Solyc01g087630.2	2.1222	2.1685	2.1687	0.1809	0.477	0.3915	0.2633	1.4017	1.5256	4.0402	2.1096	2.7895	1.2364	0.2821	0.1652	0.5006	0.3404	0.1631
Solyc02g005300.1	0	0	0	0	0	0	0	0	0	0	0	0	0	0	0	0	0	0
Solyc03g115655.1	0	0	0	0	0	0	0	0	0	0.1193	0	0	0	0	0	0	0	0
Solyc07g054110.2	0.6512	0.2798	0.874	1.6577	1.0952	1.7844	1.3685	1.6956	2.1753	0.1585	0.53	0.1907	1.8674	2.1119	0.9068	1.1354	0.6702	1.1028
Solyc03g115120.1	0.8127	0.7699	1.0108	3.2592	1.3345	1.7049	2.7038	1.178	2.0195	0.5214	1.0247	0.4278	2.4567	2.7041	2.7057	1.5259	2.7052	1.3505
Solyc01g111930.4	8.9093	7.0819	8.0317	21.8342	16.5047	17.2096	17.8022	15.0269	17.2472	8.9238	10.0243	11.7583	14.9844	16.2545	14.9921	12.3745	12.839	12.706
Solyc01g011070.1	0	0	0	0	0	0	0	0	0	0	0	0	0	0	0	0	0	0
Solyc08g005420.3	1.6642	2.3467	3.0231	2.7345	4.8377	6.107	2.3268	3.062	4.2883	1.4602	1.3517	1.1301	3.2971	3.6624	4.8211	2.0758	1.6837	1.8215
Solyc08g048430.4	14.5403	20.4364	19.3834	26.6539	29.9214	24.5132	18.5656	17.2979	18.5421	16.2743	15.3731	14.3956	22.5523	17.6778	16.305	13.7402	13.7133	12.8397
Solyc10g083740.3	12.0351	16.9134	23.1003	17.9576	15.1294	17.3547	27.4282	15.5661	17.0659	52.4823	45.2486	66.4407	28.3599	28.5875	30.5594	42.2354	48.9603	49.6085
Solyc08g066910.1	0	0	0	0	0	0	0	0	0	0.3091	0	0.4191	2.2797	3.968	4.8564	1.8147	2.0721	4.0335
Solyc06g074170.3	0.2705	0.1089	0.3867	0.0712	0.132	0.3151	0.2665	0.2551	0.1545	0.3034	0.6199	0.506	0.3796	0.3709	0.3913	0.309	0.5157	0.736
Solyc01g106970.3	0	0.1981	0.1802	0.2084	0.1267	0.1115	0.1744	0.0945	0.1599	0.0153	0	0	0.053	0.2409	0.1454	0.1162	0.0995	0.0701
Solyc03g082990.3	7.0818	6.7249	6.7266	9.8153	10.0814	11.1926	6.5021	6.8131	7.6564	7.6251	6.4584	7.9432	5.8454	6.6027	5.9351	6.7795	4.1616	4.0015
Solyc07g041100.1	0	0	0	0	0	0	0	0	0	0	0	0	0	0	0	0	0	0
Solyc04g026110.4	1.5221	1.3765	1.467	6.0083	4.5539	3.378	3.7262	2.0914	2.0839	0.7486	1.446	1.2941	3.3916	3.7924	2.8133	1.2518	1.011	1.8367
Solyc12g019860.2	15.6591	17.1039	18.2594	20.8593	21.0351	21.7023	15.7273	14.2178	15.3079	14.4644	14.0461	13.546	19.8316	19.8386	17.568	13.9898	14.0944	13.1137
Solyc06g075030.1	3.484	4.7993	4.3641	6.9147	7.2335	7.1551	5.5964	4.3569	4.5754	1.856	3.7992	3.4806	4.9381	5.5469	4.3965	3.9776	3.5031	3.3257
Solyc08g045640.3	5.291	3.7751	4.1389	11.0652	10.659	11.7755	6.6231	6.293	6.7834	4.6056	5.1038	4.9525	8.9802	7.2907	6.966	4.1375	3.9462	4.5359
Solyc11g010530.2	0	0	0	0	0	0	0	0	0	0	0	0	0	0	0	0	0	0
Solyc10g150141.1	0	0	0	0	0	0	0	0	0	0	0	0	0	0	0	0	0	0
Solyc03g083890.2	0	0	0	0.031	0	0	0	0	0	0.0289	0.1325	0	0.1008	0	0	0	0	0
Solyc01g091550.3	11.9114	9.3606	11.3935	18.0895	17.0874	18.0925	13.5678	11.4121	13.9797	11.6594	9.6461	11.2562	13.7021	12.3416	12.4137	10.2716	8.9647	7.9072
Solyc10g078310.2	18.4887	18.8202	20.015	30.2899	33.6812	31.7272	19.7988	21.1546	21.957	9.6512	12.5203	12.3662	18.362	15.0935	17.6575	9.9231	10.1944	11.8476
Solyc09g074970.3	5.958	5.7121	7.6979	7.2778	6.5981	7.5307	5.5386	4.7498	5.1763	5.6587	5.3858	4.3103	12.7798	17.307	17.5868	8.3966	8.6624	7.9092
Solyc11g006240.2	0	0	0	0.1577	0	0	0	0	0	0	0	0	0	0	0	0	0	0
Solyc10g007790.3	0.1394	0.0679	0	0.0683	0	0	0	0	0	0.066	0	0	0.1022	0	0.1326	0	0.3049	0.0931
Solyc04g050480.4	4.4018	3.193	3.8275	8.8974	7.1963	7.3027	6.3579	4.8654	5.88	5.3549	4.4795	4.5356	11.0858	8.1103	8.0465	5.7366	5.926	6.0273
Solyc11g033288.1	31.3369	31.067	27.7724	34.9249	38.6774	32.3904	32.3792	29.4543	31.2914	27.2199	28.25	27.4642	30.4536	30.6577	25.7318	26.5268	25.4689	24.0523
Solyc01g056640.1	0	0	0	0	0	0	0	0	0	0	0	0	0	0	0	0	0	0
Solyc09g074960.1	0	0	0	0	0	0	0	0	0	0	0	0	0	0	0	0	0	0
Solyc11g021363.1	0	0	0	0	0	0	0	0	0	0	0	0.0645	0	0	0	0.0371	0	0
Solyc08g079830.4	37.3225	30.3189	31.1593	41.3258	33.8311	40.435	37.7131	39.4867	40.1136	56.0193	34.4156	34.4371	47.4255	34.2789	25.0042	47.4709	34.2305	27.3459
Solyc10g006430.3	0.1729	0.2614	0	0.2599	0.2012	0.5036	0	0.2053	0	0	0	0	0	0	0	0.186	0	0.1955
Solyc03g121700.4	17.6002	21.8182	17.7179	19.28	22.336	20.8766	13.2511	15.2254	15.9396	14.5981	12.2706	13.5764	18.2129	18.1583	14.4121	11.0706	13.1197	11.5556
Solyc08g065145.1	0	0	0	0	0	0	0	0	0	0	0	0	0	0	0	0	0	0
Solyc01g005530.3	6.0913	6.0586	6.7641	18.043	16.0208	19.4295	12.3784	10.1797	9.2637	3.5639	7.3819	7.9676	15.1124	16.5241	14.2292	10.0988	10.7468	11.7208
Solyc05g006320.4	14.6173	14.4249	12.6482	22.1708	26.0654	23.6711	15.382	14.5838	14.2304	13.1125	12.5429	12.2982	15.9056	13.8278	11.3575	8.8271	10.9122	9.8802
Solyc03g096730.3	50.1656	38.6421	43.6339	80.6268	61.4389	61.5073	81.1721	63.83	69.3196	52.239	65.2054	61.1945	86.4416	89.1861	81.4236	80.79	92.7811	86.6953
Solyc03g051920.4	4.0346	4.4477	3.9802	14.8622	18.6327	15.9279	5.0585	6.491	5.9371	3.7502	3.3417	4.4014	9.7607	9.3147	7.4625	4.2037	4.8907	4.7586
Solyc08g074520.2	11.8861	13.8955	11.2058	9.1218	10.797	11.4512	7.3931	5.3735	8.0302	12.2586	11.1044	10.2698	7.7528	6.9369	7.8104	6.5166	8.3529	6.9821
Solyc01g109280.3	16.1865	15.2335	15.2712	12.7213	13.4117	11.9756	10.9737	12.757	10.8186	13.3129	11.3778	10.9946	7.9477	8.8935	8.3807	9.5493	8.4826	7.09
Solyc04g076870.4	269.841	280.799	276.687	101.098	89.5841	89.9584	259.318	260.828	219.181	321.629	402.153	344.48	75.4637	62.5493	75.1321	244.148	273.168	319.852
Solyc03g025200.3	2.2725	1.8669	2.7646	5.7124	6.3859	8.0628	2.4184	2.8243	3.2676	3.8731	2.8773	3.1394	8.9507	9.3778	10.5621	6.4545	6.4188	6.2114
Solyc01g091290.4	0	0	0.3349	0	0.3688	0.439	0	0	0	0	0.106	0	0.1449	0	0.4177	0.1555	0.4153	0
Solyc10g084930.2	4.4277	5.4686	5.9331	6.4015	9.9704	10.0152	4.0883	4.7394	6.2563	3.2258	3.0525	2.8723	5.252	5.5178	5.2449	3.9865	2.8842	3.3247
Solyc06g068590.4	0.4362	0.3848	0.1699	0.4545	0.3444	0.3123	0.2875	0.1767	0.2138	0.2258	0.2736	0.4265	0.314	0.2424	0.2908	0.1986	0.2742	0.3257
Solyc01g150141.1	0	0	0	0	0	0	0	0	0	0	0	0	0	0	0	0	0	0
Solyc01g091280.3	9.2032	8.1805	9.797	15.632	18.1721	18.4845	10.8397	13.6957	15.6199	7.645	9.5261	9.511	15.9487	16.6093	17.0667	13.5813	14.3914	13.6269
Solyc09g066000.1	2.5993	3.2286	2.9422	2.7979	2.8445	2.6604	3.753	4.3871	4.7034	2.6461	2.494	1.9961	2.3867	2.8453	3.9412	2.0196	3.522	3.1921
Solyc11g069280.2	0.0692	0.0159	0.0387	0.1057	0.1617	0.4938	0.2553	0.2607	0.1868	0.221	0.0935	0.2742	0.4265	0.6622	0.2314	0.68	0.4155	0.5419
Solyc09g089810.1	0	0	0	0	0	0	0	0	0	0	0	0	0	0	0	0	0	0
Solyc01g096750.1	0	0	0	0	0	0	0	0	0	0	0	0	0	0	0	0	0	0
Solyc12g035750.1	0	0	0	0	0	0	0	0	0	0	0	0	0	0	0	0	0	0
Solyc02g080160.4	2.3121	0.8912	0.6694	2.3538	0.4705	0.4134	4.2031	3.0597	2.521	4.9102	8.628	8.9022	4.2853	4.8415	6.6156	8.3255	10.2517	10.4702
Solyc04g078710.3	0.1762	0.1782	0.1029	0.4009	0.0837	0.174	0.6563	0.4621	0.2615	0.2609	0.1672	0.4429	0.5141	0.6999	1.1752	0.7226	0.699	0.9577
Solyc00g164580.1	0	0	0	0	0	0	0	0	0	0	0	0	0	0	0	0	0	0
Solyc07g041180.4	2.4357	1.9466	2.4337	3.5862	2.8842	3.334	2.8896	2.6159	2.6339	2.3864	2.2587	1.7947	2.9203	2.7126	2.6457	1.8204	1.9016	1.7959
Solyc06g051730.4	7.8006	7.1081	8.687	15.1925	17.3297	15.3524	9.3729	10.9301	9.0867	6.8041	7.1662	6.6431	6.9222	8.9613	6.7315	6.1599	4.7788	6.3574
Solyc07g055800.2	0	0	0	0	0	0	0	0	0	0	0	0	0	0	0	0	0	0
Solyc02g078360.4	10.2941	12.9925	13.3091	15.301	19.5615	17.4839	9.703	11.3896	11.7216	11.2791	11.2531	10.0124	14.1233	13.2101	14.3251	11.0904	10.3869	9.9302
Solyc12g042530.2	0.9894	1.252	2.4044	1.4059	0.6478	3.6708	1.648	1.4755	2.045	4.8734	4.5797	5.2006	4.0159	2.353	3.3969	4.1987	3.916	2.8413
Solyc09g042430.2	0	0	0	0	0	0	0	0	0	0	0	0	0	0	0	0	0	0
Solyc02g089920.1	2.0197	0.0694	1.9964	0.0525	0	0.0674	0	2.6362	0	4.0922	3.2935	1.8467	0	0	0	0	1.9861	0
Solyc10g076915.1	0	0.9041	0	1.458	0.6765	1.8534	0.4431	0.2367	0	0.4803	0	0	0	1.1118	0.5126	0.7424	0.6136	0
Solyc11g073040.1	2.4346	1.3679	1.3662	0.2813	0.1878	0.0609	1.8408	0.7779	1.9175	0.4917	1.0183	0.8238	0	0	0.0063	0.4797	0.2756	0.2425
Solyc11g073050.2	22.9441	21.3024	18.8567	35.7841	30.3576	32.078	31.536	23.8939	26.7773	18.663	21.2417	21.4636	31.1392	35.5439	36.6523	22.7997	23.065	25.4121
Solyc11g040065.1	1.3858	1.2173	1.6395	3.8394	3.1212	3.2713	2.6669	2.9377	2.3459	1.8958	1.5288	1.8581	1.8165	1.8574	1.9148	1.1365	2.1358	1.6098
Solyc03g082910.4	9.011	8.8465	9.2196	11.8847	14.3943	15.8195	9.7096	9.53	8.1488	7.6804	7.3773	6.3883	12.9897	10.2751	8.54	8.5569	7.9169	7.2747
Solyc06g005340.3	0.7601	0.4761	0.7242	3.232	2.0685	1.4291	0.6025	0.7795	1.9862	0.3976	0.9411	0.664	1.1524	0.8656	0.6842	0.4549	0.5188	0.4649
Solyc03g007850.1	0.1993	0.0644	0.3244	0.2344	0.226	0.4528	0.0681	0.1392	0.0716	0.0323	0.1591	0.043	0.1505	0.0735	0.1283	0.0684	0.0455	0
Solyc02g055395.1	0	0	0	0	0	0	0	0	0	0	0	0	0	0	0	0	0	0
Solyc12g096250.2	0.3321	0.2709	0.0989	0.3145	0.1409	0.5053	0.3412	0.1658	0.1237	0.2762	0.1672	0.0764	0.5798	0.4784	0.4048	0.1901	0.0673	0.1404
Solyc02g069580.3	19.0151	20.9435	21.4787	35.5988	40.7819	48.517	10.6397	12.9694	14.4857	21.871	20.7159	18.5337	25.693	28.5142	26.3297	10.6931	11.983	9.7417
Solyc02g080590.3	10.1917	9.532	9.9632	14.6208	13.1841	15.9469	12.5597	10.4186	11.8479	11.3923	10.3481	9.851	12.7649	14.7003	14.2591	10.5276	11.6104	10.0709
Solyc01g015000.3	0	0	0	0	0	0	0	0.1062	0	0	0	0	0	0	0	0	0	0
Solyc10g083580.2	0	0	0	0.2044	0.1772	0.3081	0.0586	0	0.3751	0	0	0	0	0.1225	0.5142	0	0	0
Solyc10g055550.3	0	0	0	0	0	0	0	0	0	0	0	0	0	0.1834	0	0	0.0394	0
Solyc03g111705.1	0	0	0	0	0	0	0	0	0	0	0	0	0	0	0	0	0	0
Solyc01g012670.3	0	0	0	0	0	0	0	0	0	0	0	0	0	0	0	0	0	0
Solyc05g055190.1	0	0	0	0	0.0102	0	0	0	0	0	0.011	0	0	0	0	0	0	0
Solyc01g067300.3	1.6277	0.4141	0.5715	0.3452	0.7909	0.5228	0.3397	0.0785	0.1719	0.1806	0.4085	0.1935	0.1744	0.4635	0.5472	0.2553	0.4286	0.2179
Solyc10g079690.2	0	0	0	0	0.0564	0	0	0.0442	0.3557	0.0555	0	0.291	0.4205	0	0	0	0.2958	0
Solyc01g005100.4	5.5847	5.2794	5.997	13.6942	10.4107	12.861	9.0402	10.4651	9.0374	5.7758	5.9067	7.26	10.3229	10.4572	9.1199	8.9135	8.43	8.5491
Solyc01g096150.4	2.2619	1.1767	1.4123	6.9093	5.0377	7.6231	2.7871	1.6464	2.1179	2.2618	3.1829	2.7172	12.6395	10.4509	12.0765	5.1326	4.8893	6.9319
Solyc03g062900.3	1.3423	1.5062	1.3502	2.6603	3.3543	2.0407	3.0996	2.3296	2.1912	1.5354	1.0291	1.6671	1.1502	1.3606	0.9768	0.9904	1.4277	1.3638
Solyc02g081230.4	2.5924	1.9213	1.8112	2.0773	1.6331	1.8855	2.2172	3.2427	2.9123	1.5126	2.077	1.2683	2.2072	1.8477	1.052	2.6014	2.2419	2.119
Solyc07g054340.1	1.5319	2.0636	1.6251	3.0524	4.0455	4.79	2.1577	1.7642	2.0341	1.09	1.1996	0.5093	1.8932	2.0024	1.9523	2.1691	1.7671	0.8074
Solyc01g057830.3	171.941	164.388	160.719	282.135	218.315	241.932	203.36	180.958	163.276	293.953	272.25	316.746	300.985	261.903	298.158	244.995	221.162	265.748
Solyc06g062680.3	0.4257	0.3995	0.2955	0.4085	0.2328	0.3943	0.5016	0.5605	0.6241	0.2574	0.5778	0.3039	0.4856	0.8377	0.5459	0.6245	0.5451	0.4288
Solyc05g006040.4	1.0771	1.1595	1.3933	2.7471	2.205	3.5781	1.1697	0.9081	0.6833	1.2133	1.6781	1.183	1.9543	2.4667	2.398	1.0399	1.2264	1.2719
Solyc12g010140.2	0.5932	0.2753	0.676	0.176	0.7249	0.5515	0.1799	0.479	0.6799	0.4165	0.4057	0.1416	0.1933	0.7385	0	0.2216	0	0.2664
Solyc09g082390.3	4.4878	5.7172	3.5944	6.5286	5.8465	5.3537	4.9637	5.3533	5.0531	4.7515	5.2777	5.5483	5.7406	7.3991	6.2546	4.9167	5.3393	5.5674
Solyc08g022025.1	0	0	0	0	0	0	0	0	0	0	0	0	0	0	0	0	0	0
Solyc01g097620.2	0	0	0	0	0	0	0	0	0	0	0	0	0	0	0	0	0	0
Solyc11g063590.2	0	0	0	0	0	0	0	0	0	0	0	0	0	0	0	0	0	0
Solyc03g077880.1	0	0	0	0	0	0	0	0	0	0	0	0	0	0	0	0	0	0
Solyc07g055390.1	0	0	0	0	0	0	0	0	0	0	0	0	0	0	0	0	0	0
Solyc10g081040.1	113.374	74.2184	108.051	45.9473	65.5244	62.9362	37.742	83.3754	78.6422	79.7159	86.0231	76.1444	11.175	9.5313	7.9998	8.5837	8.1946	8.7146
Solyc04g005810.3	2.8634	0.5973	0.7698	0.5317	0	0.2343	0.602	0.3172	0.5042	0.17	0.9088	0.4563	0	0.5034	0.222	0.1266	0	0.1191
Solyc08g079970.2	0	0	0	0	0	0	0	0	0	0	0	0	0	0	0	0	0	0
Solyc11g071880.3	0	0	0	0	0	0	0	0	0	0	0	0	0	0	0	0	0	0
Solyc11g020930.1	0.4984	0.8634	0.2651	0.3344	0.2112	0.1938	0.7054	0.7105	0.1707	0	0	0.1255	0	0.2471	0	0.3679	0.0789	0
Solyc10g044950.1	0	0	0	0	0	0	0	0	0	0	0	0	0	0	0	0	0	0
Solyc09g065350.1	0.1932	0	0.0962	2.432	1.2708	1.1786	1.1287	0.299	0.6578	0.0878	0.4522	0.2215	1.9784	2.0844	2.8586	0.7033	0.7102	0.3992
Solyc02g067620.3	4.1824	6.7275	4.5779	6.6965	9.0254	9.1253	3.5283	3.8971	4.5604	3.2993	2.6509	2.3557	5.8682	4.8912	5.946	4.9975	3.6402	3.9615
Solyc06g008240.3	0	0	0	0	0	0	0	0	0	0	0	0	0	0	0	0.0266	0	0
Solyc09g090860.4	4.9083	4.6996	5.8487	8.3136	8.5556	9.3326	5.4506	5.3792	5.2379	2.8366	3.3769	3.4835	7.654	7.2419	6.8998	4.2689	4.1851	4.4565
Solyc01g005230.4	1.1532	2.511	3.4981	3.8307	4.5768	4.7636	1.2406	1.778	1.2979	1.0235	0.5789	0.34	0.8217	0.5646	0.2667	0.2763	0.233	0.0498
Solyc03g096140.2	0	0	0	0.0517	0	0	0	0	0	0	0	0	0	0	0	0	0	0
Solyc04g054250.4	0	0	0	0.0196	0.0262	0	0	0	0	0.013	0	0	0	0	0	0	0	0
Solyc06g075770.1	0	0	0	0	0	0	0	0	0	0	0	0	0	0	0	0	0	0
Solyc03g006050.4	3.7679	4.4694	3.0417	8.557	5.0697	8.0156	7.9748	4.2468	3.7896	3.5352	6.5424	5.8532	12.8839	13.6899	14.3908	8.8684	9.9625	11.5321
Solyc07g064910.3	3.4669	2.6684	3.4523	11.6723	11.7854	12.2435	5.933	4.7193	5.5364	3.8658	4.4207	5.3654	11.5067	12.32	12.2505	6.6504	6.114	7.9001
Solyc06g050260.1	0	0	0	0	0	0	0	0	0	0	0	0	0	0	0	0	0	0
Solyc05g023940.1	0	0	0	0	0	0	0	0	0	0	0	0	0	0	0	0	0	0
Solyc08g082520.1	0	0	0	0	0	0	0	0	0	0	0	0	0	0	0	0	0	0
Solyc11g005520.3	0.0481	0	0	0	0.1887	0	0	0	0	0	0	0	0	0	0	0	0	0
Solanum_lycopersicum_newGene_3000	0.1947	0.2111	0.0987	0.5596	0.7192	0.8453	0.3229	0.2046	0.1883	0.1094	0.0493	0.0813	0.7298	0.6747	0.716	0.3138	0.1567	0.291
Solanum_lycopersicum_newGene_3001	0.0625	0.2782	0.3547	0.0583	0.4872	0.0495	0.2016	0.1139	0	0	0	0	0	0	0.1371	0	0	0
Solanum_lycopersicum_newGene_3002	0	0	0.6221	0.1767	0.2613	0.3129	0	0	0	0	0	0	0.0673	0.0462	0	0	0.1503	0
Solanum_lycopersicum_newGene_3003	0	0	0.0554	0.8803	1.0221	1.2352	0.0883	0.1089	0	0.2039	0	0	0.5334	0.4704	0.0588	0.0731	0	0
Solanum_lycopersicum_newGene_3005	0.0453	0.217	0.1453	0.3818	0.5846	0.1115	0.155	0.2039	0.1909	0.0823	0	0	0.4434	0.2802	0	0.2617	0.3658	0.1499
Solanum_lycopersicum_newGene_3006	0	0.0914	0	0.1446	0.1208	0.1262	0.0968	0	0.0408	0	0.1349	0	0.066	0.2447	0.2568	0.0539	0.0407	0
Solyc07g053320.4	13.5383	10.0443	9.9864	19.6855	23.1706	24.731	10.8442	10.178	9.0385	7.7857	6.1653	7.04	11.9901	9.8858	11.7569	7.0749	4.2771	4.8707
Solyc01g101050.3	0.1926	0	0	0.1413	0	0.0603	0	0	0	0.0922	0	0	0	0	0	0	0	0
Solyc05g006530.4	8.88	9.5197	11.272	10.6541	14.375	15.163	6.2226	6.0603	6.9393	10.6134	8.266	8.8908	7.0245	6.4235	6.5245	5.7354	5.5985	4.746
Solyc11g006870.1	2.3793	2.054	2.5554	6.8738	7.0969	8.8487	3.3054	2.9336	5.0981	2.2413	3.2812	2.114	9.0437	11.1153	8.3207	3.8546	5.6453	5.0318
Solyc11g065360.2	0	0	0	0.0157	0	0	0.1712	0.0223	0	0	0	0	0	0	0	0	0	0.0223
Solyc02g079430.4	13.852	18.9842	18.2341	4.8565	7.1859	8.5242	7.9995	11.908	8.6273	20.1781	16.4493	19.6951	4.6888	4.5094	4.3662	3.2447	2.6212	2.9377
Solanum_lycopersicum_newGene_562	0	0	0	0	0	0.218	0	0	0	0.1091	0	0	0	0	0	0.0395	0	0
Solyc12g098100.3	0.0798	0.0658	0.0097	0.1905	0.0478	0.033	0.0501	0	0	0.0878	0.2171	0.1834	0.1015	0.2167	0.1945	0.1734	0.11	0.2326
Solyc02g071240.3	1.6492	2.5198	3.3676	3.0103	1.8034	2.3927	2.2164	2.6582	2.728	2.9795	3.6035	2.3112	2.3878	2.7468	2.4583	2.2396	2.5686	2.8475
Solyc11g007900.3	3.6053	2.9513	4.3805	28.9672	21.1109	24.9794	4.9718	3.54	4.9252	9.1384	8.909	10.6447	42.3724	38.9824	41.5525	16.2791	15.4294	13.1188
Solyc07g054850.3	7.0359	3.2829	6.3868	18.8983	16.0771	18.7255	8.1345	4.7605	5.579	4.6417	5.6528	7.4317	22.8232	25.8604	19.8377	9.2708	8.8772	9.4172
Solyc09g008720.3	0	0	0	0	0	0	0	0	0.0572	0	0	0	0	0	0	0	0	0
Solyc01g067380.4	8.2209	6.3189	6.1416	15.97	19.5765	18.7851	10.202	11.1964	10.0976	4.9198	5.3712	5.8304	9.6105	8.2592	7.3276	6.2723	5.377	4.7871
Solyc04g080560.2	0.0491	0	0	0	0	0	0.0595	0.0799	0	0	0	0	0	0	0	0	0	0
Solyc11g072140.3	0.2694	0.2114	0.1314	1.9049	1.3507	1.7398	0	0.3138	0.2737	0.0778	0.0455	0.1986	0.0591	0	0.0435	0.0197	0	0
Solyc06g075280.3	0	0.0303	0	0	0	0.0565	0.0301	0.0228	0	0.3007	0.1776	0.1315	0.0669	0.2349	0.5702	0.4625	0.3222	0.5508
Solyc07g007450.3	0	0.1449	0.3659	0.1747	0.3057	0.1383	0.2337	0.2002	0.2396	0	0.1665	0.2772	0.1108	0.1276	0.2692	0.0686	0.3338	0.1753
Solyc02g080770.2	0.36	0.7914	0.3296	1.836	1.8782	1.4724	1.5284	1.0621	1.7998	0.3611	0.968	1.0066	4.0382	5.4842	4.6263	1.9929	2.9832	2.821
Solyc03g116960.4	0.0199	0	0	0.117	0.1043	0.5552	0	0.2862	0.358	0.3607	0.3322	0.0938	0.2241	0.3648	0.4047	0.162	0	0.34
Solyc10g008810.3	0	0	0	0	0.0833	0	0.126	0	0	0	0	0	0	0	0	0	0	0
Solyc06g053620.4	7.0509	1.8029	8.3211	2.3148	0.9863	1.5301	5.5364	4.9774	9.8247	10.1706	15.56	10.9473	1.2501	1.5425	1.6513	3.6993	4.2015	2.9493
Solyc02g150112.1	0	0	0	0	0	0	0	0	0	0	0	0	0	0	0	0	0	0
Solyc12g057040.2	122.481	112.602	121.11	111.816	131.397	117.728	90.864	111.121	85.741	64.1283	67.0881	62.1257	46.9609	38.8723	40.8475	42.191	41.2064	37.9371
Solyc03g123730.4	12.4871	15.2539	16.2023	14.1724	13.6513	15.936	14.514	15.4567	19.4694	24.7307	20.1978	26.303	25.3149	23.3258	23.417	26.364	25.0588	22.4358
Solyc09g059130.1	0	0	0	0	0	0	0	0	0	0	0	0	0	0.2042	0	0	0	0
Solyc00g500066.1	0.1645	0.5177	0.4555	2.3808	1.8486	1.1994	3.2668	4.0902	2.7759	0.2565	0.5997	0.6076	0.455	8.7512	0.6571	0.697	0.7444	3.0059
Solyc02g150128.1	4.9993	15.3882	14.539	0.3673	0.2546	0.7142	1.2739	3.6377	1.1972	16.4842	13.8505	17.0076	0.1982	0.1022	0.1383	0.8378	0.8193	0.6395
Solyc03g097290.4	77.8917	90.6985	91.0389	83.8481	111.989	104.359	63.4945	77.4439	71.5405	76.2432	65.1268	69.4349	64.9614	54.9213	51.647	53.7615	49.5489	49.9827
Solyc06g066690.4	0.1363	0.099	0.3005	0	0	0	0.546	0.3135	0.2987	0.4655	0.2045	0.3242	0	0	0.1149	0.6677	0.3839	0.4099
Solyc12g042170.3	3.6414	4.6368	5.1154	3.9044	4.0888	3.9875	7.4379	5.9955	7.097	5.3218	4.7861	5.0265	5.0049	4.3318	5.8659	5.3338	6.7785	6.1716
Solyc03g120680.3	2.3159	2.554	2.2737	5.157	4.3158	4.5439	3.374	2.3778	3.1125	3.2612	3.5374	3.9423	7.3672	5.1567	7.2805	4.8195	4.5204	3.5822
Solyc01g008610.4	0	0	0	0	0	0	0	0	0	0	0	0	0	0	0	0	0	0
Solyc03g078505.1	0	0.1647	0.5001	1.7346	0.7971	1.7498	0	0	0.9625	0	0.4661	0.9587	0	1.2739	1.4275	0.8811	1.0198	0
Solyc10g007800.3	0	0	0	0	0.0201	0	0	0.0457	0	0	0	0	0	0.0672	0	0	0	0
Solanum_lycopersicum_newGene_1138	1.2069	1.1582	2.441	0.7259	0.9274	0.5589	1.2598	1.5974	0.6855	0.8947	1.0013	0.328	0.6549	0.462	0.5925	0.5126	0.5542	0.5917
Solyc08g006610.3	2.0654	2.4617	2.2043	4.6931	4.8138	4.4152	3.0454	3.2921	2.2649	1.3808	1.3137	1.5438	3.3156	3.2663	2.9215	2.6578	2.3162	2.5524
Solyc08g068410.3	0	0	0	0	0	0	0	0	0	0.0327	0	0	0	0	0	0	0	0
Solanum_lycopersicum_newGene_1139	0	0	0	0	0	0	0	0	0	0.0553	0	0	0	0	0	0	0	0
Solyc04g079850.2	0.435	0.3807	0.553	1.3231	1.7807	1.8086	0.2426	0.3438	0.3992	0.339	0.2875	0.2264	1.1265	0.9281	0.9868	0.1852	0.4019	0.2011
Solyc01g010650.3	9.0841	9.515	7.3378	32.1174	35.0515	36.1415	16.8177	21.3052	23.8132	9.0681	10.404	12.0642	36.8013	39.1374	41.665	13.1702	18.2787	15.5489
Solyc09g059670.4	0.2489	0.315	0.3472	1.2986	1.5648	1.6141	0.6407	0.4453	0.6406	0.3688	0.3479	0.4026	0.8651	1.2841	0.8879	0.3994	0.6473	0.5863
Solyc07g150121.1	0	0	0	0	0	0	0	0	0	0	0	0	0	0	0	0	0	0
Solyc02g071090.3	1.7501	0.4479	0.9731	0.3636	0.0792	0.7968	0.4356	0.4727	0.7635	0.7064	0.5324	0.4181	2.7104	1.4922	1.1587	0.8189	0.3991	0.5045
Solyc05g005200.3	8.1547	17.947	13.453	13.7514	20.5387	18.1301	5.7552	8.5662	9.2853	10.0809	12.206	13.1357	8.0425	6.7077	5.637	4.284	3.4646	3.3779
Solyc02g005600.1	0	0	0	0	0.0328	0	0	0	0	0	0	0	0	0	0	0	0	0
Solyc08g077640.3	0	0	0	0	0	0	0	0	0	0	0	0.0814	0	0	0.2556	0	0	0
Solyc07g007390.3	36.9442	43.907	40.4203	22.101	23.0345	22.0071	24.3058	25.1039	22.5008	36.7835	33.943	29.9495	15.6547	15.6586	14.5265	16.268	16.6246	16.3046
Solyc05g006250.1	0	0	0	0	0	0	0	0	0	0	0	0	0	0	0	0	0	0
Solyc05g009860.3	0	0	0.1261	1.6592	1.0501	1.1428	0	0.1003	0.2108	0	0.1924	0	3.0443	3.9695	2.6718	0.47	0.1926	0.2241
Solyc01g059930.3	66.8673	67.3509	72.5422	84.4095	114.462	100.385	71.193	83.1092	70.0334	69.2151	66.3307	72.6351	84.0512	74.8122	86.5274	65.2495	58.5046	54.9327
Solyc03g007380.2	0.2399	0.2764	0.5706	1.6088	1.7319	1.1994	0.2229	0.4918	0.2925	0.5048	0.6331	0.1573	0	0.0349	0.1989	0	0	0
Solyc01g066895.1	0	0	0	0	0	0	0	0	0	0	0	0	0	0	0	0	0	0
Solyc00g013110.1	0	0	0	0	0	0	0.0383	0	0	0.0361	0.1606	0	0	0	0	0	0	0
Solyc09g092280.1	0.2329	0.5675	0.5672	0.258	0.4307	0.3216	0.2296	0.1822	0.1565	0.1603	0.285	0.1596	0.1242	0.1796	0.151	0.1633	0.0738	0.1796
Solyc07g007380.4	12.5447	15.1845	14.9079	19.1753	21.4808	21.9133	18.0174	16.1853	18.4548	16.0879	14.9816	18.0656	20.9677	17.0743	21.8675	15.0524	15.3092	18.0169
Solyc04g057990.4	5.5258	6.1766	5.7691	5.0122	5.738	6.8568	4.8577	4.3795	5.3997	5.4818	5.0135	4.4076	4.1713	4.5207	4.9906	5.3844	4.3891	5.32
Solyc03g150115.1	0	0	0	0	0	0	0	0	0	0	0	0	0	0	0	0	0	0
Solyc10g086130.3	0	0	0	0	0	0	0	0	0	0	0	0	0	0	0	0	0	0
Solyc02g087320.2	0	0	2.2266	0	0.2556	0.2081	0.3003	2.7359	0	4.2872	3.2869	0	4.452	0	0	0	0	0
Solyc05g021190.2	0	0	0	0	0	0	0	0	0	0	0	0	0	0.2231	0	0	0	0
Solyc07g006450.1	0	0	0	0	0	0	0	0	0	0	0	0	0	0	0	0	0	0
Solyc01g105630.4	0.2378	0.8016	0.4686	0.6322	0.7568	1.2957	0.3493	0.1316	0.1066	1.699	0.2529	0.6023	0	0.2445	0	0.2744	0	0
Solyc11g066910.3	6.011	5.2605	5.0106	10.2565	11.9493	11.4674	6.3308	8.2254	8.0577	4.0243	4.4603	4.3436	8.802	7.3417	7.849	4.8781	3.9525	3.6568
Solyc03g097050.3	15.734	16.317	7.7607	2.6264	2.3624	3.5782	1.2257	1.747	2.1059	4.1012	12.4355	11.9576	3.1443	4.375	3.7408	2.6053	3.5763	3.022
Solyc07g045040.3	0.0307	0	0	0	0	0	0	0	0	0	0	0	0	0	0	0	0	0
Solyc01g009550.1	0	0	0	0	0	0	0	0	0	0	0	0	0	0	0	0	0	0
Solyc12g099080.3	30.3855	33.2389	32.3751	50.1295	61.4982	61.3982	31.6651	34.5758	33.8104	15.4146	19.6073	16.9276	28.7786	28.7325	23.5812	16.3566	15.246	17.1044
Solyc06g049060.3	7.1581	7.7618	7.6993	6.5782	8.8456	8.4243	5.4624	7.8255	6.8444	5.9837	5.7699	7.4048	4.6448	4.182	4.9624	3.956	4.6702	3.8594
Solyc03g006260.4	2.167	0.7689	1.0292	1.6713	0.8503	1.2674	0.7989	0.6399	0.5194	1.0947	1.2049	1.4559	1.658	2.431	2.1202	1.6383	1.0048	1.3501
Solyc01g066390.4	0	0	0	0	0	0	0	0	0	0	0	0	0	0	0	0	0	0
Solyc04g080070.1	0.0254	0	0.1095	0	0.1922	0.2096	0.2006	0.1979	0.391	0.1599	0.1676	0.3268	0.1208	0	0.1248	0.0987	0.1336	0.1962
Solyc04g009320.3	2.8461	2.4487	2.8267	7.5834	8.8335	6.7195	6.5946	9.5281	10.4588	4.428	5.2634	8.0776	17.7516	19.8241	19.967	7.3591	9.5213	6.9816
Solyc03g059100.3	27.5981	35.8583	37.2416	37.2799	47.7869	43.5487	39.6152	40.839	39.6571	22.7785	19.1422	23.7658	21.5978	20.0383	20.8412	18.0188	15.8826	19.2574
Solyc01g087160.2	0.2381	0.3819	0.3971	0.3463	0.2586	0.5989	0.365	0.5465	0.62	0.4494	0.2573	0.2899	0.1357	0.115	0.4301	0.3821	0.1667	0.1681
Solyc03g121300.2	45.6528	41.4226	39.3971	39.3818	38.8136	45.913	23.3168	33.3918	30.6606	20.0804	26.2515	23.9157	25.8264	32.3147	25.2116	21.3481	17.9375	26.9653
Solyc04g025283.1	0	0	0	0	0	0	0	0	0	0	0	0	0	0	0	0	0	0
Solanum_lycopersicum_newGene_1518	0	0.4324	0	0	0.0875	0	0.1206	0.0443	0.3831	0	0	0	0.1854	0	0	0.1594	0.0269	0
Solanum_lycopersicum_newGene_1519	0	0	0	0	0	0	0	0	0	0	0.2964	0	0	0.5036	0.2828	0.046	0.2531	0
Solyc06g061050.4	36.0261	33.1026	30.5528	31.7541	30.7218	35.3328	23.0093	24.8109	30.413	33.3306	30.6637	34.9346	32.5188	28.9009	24.0391	23.3393	22.5487	26.1041
Solanum_lycopersicum_newGene_1510	1.0569	1.8863	2.6532	1.6387	6.6007	5.1399	1.0686	1.2454	1.9247	0.3338	0.7417	0.3027	0.9061	1.4766	0.2754	0.2007	0.7714	0.417
Solyc12g006650.2	6.7515	6.4302	6.6654	9.796	9.9937	10.3193	9.6201	9.4238	8.3774	6.3284	6.2385	5.7772	7.9343	7.9616	7.6897	6.1023	7.0845	7.2685
Solanum_lycopersicum_newGene_1515	0	0	0	0	0	0	0	0	0	0.176	0	0	0	0	0	0	0	0
Solanum_lycopersicum_newGene_1517	3.0404	4.2028	4.2325	3.9325	3.545	4.199	2.6336	2.3564	2.9777	2.5116	2.2713	2.1617	3.6938	2.8484	3.0094	3.2052	2.9262	2.9526
Solyc06g073790.3	46.4437	42.5197	45.3001	56.9995	54.8827	60.7249	51.8468	43.4335	48.1504	74.502	67.8909	92.6264	62.7165	65.0602	67.0943	66.0559	62.6915	76.2249
Solyc11g007930.1	1.699	1.7682	2.0505	11.1922	5.0555	6.9518	6.5551	2.5101	2.8134	4.297	3.5113	8.7899	16.9554	15.2881	16.0362	5.4849	4.7799	4.9137
Solyc08g074600.4	1.4097	1.7191	1.5697	7.1323	6.2789	6.6174	1.6253	2.1423	2.103	1.5909	1.6054	1.6464	5.341	5.8988	4.9511	1.4667	1.6629	1.8178
Solyc07g042430.1	0	0.1699	0.0242	0.1245	0.1205	0.371	0.084	0.1856	0.0848	0.1476	0.1545	0.0854	0.1735	0.0906	0.0482	0.25	0.1426	0
Solyc03g025600.3	6.139	7.9287	8.0704	30.6073	49.0003	46.4165	8.5607	8.3359	10.3052	5.1259	4.6379	5.2237	21.3593	20.5448	19.4084	6.1191	5.3521	4.998
Solyc09g082650.4	154.339	154.24	147.726	258.484	241.231	240.186	227.857	259.464	266.485	167.813	130.172	135.318	342.599	388.849	357.819	294.179	292.861	246.113
Solyc01g028985.1	0	0	0	0	0	0	0	0	0	0	0	0	0	0	0	0	0	0
Solyc04g051885.1	0	0	0	0	0	0	0	0	0	0	0	0	0	0	0	0	0	0
Solyc02g071990.3	16.1286	16.6712	22.0606	22.7643	31.2102	30.152	6.9336	10.8064	9.8776	26.5331	21.0513	19.7136	11.5648	10.3022	7.7426	5.7818	5.184	5.8337
Solyc05g010160.3	3.5273	3.4208	3.1125	5.3837	5.9186	6.9263	2.6591	2.5252	3.0096	3.2413	3.8757	4.1768	5.5681	6.4088	7.3652	3.2725	3.4415	3.9341
Solyc08g007210.4	5.9514	9.1116	14.6625	2.9473	3.0819	3.9875	8.7409	12.4681	12.3476	10.8759	14.8229	6.4965	2.3669	4.4913	5.7292	8.1623	7.1212	6.4287
Solyc07g063540.3	5.4494	4.1278	6.424	12.3784	11.2109	13.0066	7.1908	6.709	8.5096	15.149	11.9091	16.6849	15.7385	15.9928	15.3433	13.4918	13.0615	18.3664
Solyc08g078930.1	0	0	0	0	0	0	0	0	0	0	0	0	0	0	0	0	0	0
Solyc03g006910.3	0.3193	0.0424	0.1675	0.1391	0.4489	0.6918	2.4375	2.7881	2.5357	0.9245	0.5662	1.5222	2.9607	5.6463	4.1797	7.1394	9.2641	20.2516
Solyc08g008080.1	2.8728	4.993	6.1188	1.8566	1.6947	2.7776	1.3102	1.2482	1.6019	1.5721	1.7996	1.8776	1.2264	2.5605	1.2498	1.095	0.9873	0.9949
Solyc06g033950.1	0	0	0	0	0	0	0	0	0	0	0	0	0	0	0	0	0	0
Solyc07g015983.1	0	0	0	0	0	0	0	0	0	0	0	0	0	0	0.1052	0	0	0
Solyc07g066270.4	8.9316	7.879	9.7422	17.7062	18.4316	19.566	13.0196	17.4651	18.4473	12.4936	11.8096	15.1372	23.9304	21.2466	23.408	19.2287	12.5937	12.4206
Solyc01g087590.3	36.142	19.3629	18.3271	4.1898	2.8529	2.2799	3.6637	8.7187	13.9504	7.1689	11.543	14.5569	2.3325	1.818	1.3884	5.3988	6.6708	5.5473
Solyc07g052700.3	1.3705	0.7902	1.7622	1.6476	2.0603	4.1903	0.6738	0.2644	3.8858	4.9324	6.7004	7.2578	12.9357	20.7367	23.6824	8.4293	9.4885	14.0805
Solyc07g014640.3	3.4241	4.4463	3.8864	11.4969	8.0221	7.4131	5.9872	3.793	4.1967	6.6607	7.0109	8.0462	11.9235	12.0793	14.2507	8.2705	9.5927	9.6233
Solyc07g005720.3	8.7768	8.3258	8.2607	10.0912	11.1268	9.1671	4.8478	7.0501	4.5546	4.881	4.4821	4.3	6.3572	8.1805	6.2298	3.8113	2.5524	3.9774
Solyc05g010735.1	0	0	0	0	0	0	0	0	0	0	0	0	0	0	0	0	0	0
Solyc07g051940.4	0.3045	0.9045	0.1907	0.4406	0.4868	0.0915	0.8104	0.6703	1.4032	0.0163	0.046	0.1464	0	0.4017	0.4834	0.1828	0.1817	0.3188
Solyc02g068640.3	5.677	5.4776	8.2149	26.6638	26.7325	28.6562	7.642	8.7516	10.2306	19.0433	13.1269	17.9324	34.4903	29.3591	32.762	21.0571	16.6837	18.3284
Solyc01g014430.1	0	0	0	0	0	0	0	0	0	0	0	0	0	0	0	0	0	0
Solyc03g082620.4	28.745	20.4674	36.2781	10.0896	14.131	20.9124	10.6121	15.4034	15.5308	46.0863	63.555	55.2277	27.3502	30.633	41.6426	43.8976	45.5384	45.4622
Solyc11g072150.3	8.5192	8.0025	7.4126	9.1012	9.5531	8.2955	12.6197	9.095	8.9289	6.0641	5.5439	4.6048	6.7041	5.721	5.4289	5.3655	6.0389	5.4383
Solyc04g078940.3	1.1332	0.8226	0.6981	1.8294	1.0646	1.1096	1.4815	0.9766	1.228	1.0006	1.6347	1.5614	2.31	2.0059	2.0438	1.1729	1.086	1.6242
Solyc10g061980.1	0	0	0	0	0	0	0	0	0	0	0	0	0	0	0	0	0	0
Solyc09g098608.1	0	0	0	0	0	0	0	0	0	0	0	0	0	0	0	0	0	0
Solyc01g111380.3	30.3697	26.9383	30.4722	36.6831	50.4701	42.0195	32.023	31.8142	25.4679	20.7956	24.4314	16.3573	20.7532	26.6249	21.699	22.9981	17.4438	25.6291
Solyc06g036210.1	0	0	0.1684	0	0	0	0	0	0	0	0	0	0.0834	0	0	0	0	0
Solyc01g008110.4	115.194	126.414	141.594	187.052	158.087	144.336	479.466	430.079	594.52	146.744	119.261	126.043	553.857	433.968	436.563	796.04	776.371	694.675
Solyc06g084020.4	75.9443	45.0235	43.2977	275.754	296.569	330.147	140.229	106.562	106.981	37.3392	47.6414	55.8743	254.165	251.669	244.031	146.855	115.257	121.812
Solyc07g056240.3	107.707	107.745	104.856	6.2172	5.2933	5.933	103.332	125.189	113.58	128.824	119.193	123.276	5.292	6.1806	6.8305	74.0249	75.144	81.0288
Solyc09g007760.4	268.112	252.262	400.068	40.5385	42.9331	46.8509	227.374	188.732	189.604	463.505	528.392	466.036	43.5209	32.7924	37.1135	354.849	281.244	260.557
Solyc01g098710.3	2.3772	3.8849	4.0624	7.3542	6.8923	6.8472	3.3154	3.4002	3.541	2.8066	3.1608	2.9709	4.624	4.0947	4.9179	1.8963	2.243	1.8987
Solyc01g095440.2	0	0	0	0	0	0	0	0	0	0	0	0	0	0	0	0	0	0
Solyc12g096800.1	0	0	0	0.0611	0.0942	0.1286	0	0.1239	0.0298	0.0446	0.1544	0.0944	0.2674	0.7928	0.8668	0.0714	0.143	0.0918
Solyc03g080030.4	0.4253	0.0668	0.1341	0	0.0818	0.3115	0.392	0	0.8487	2.0499	0.3072	0.4047	0	0	0	0.0847	0	0
Solyc01g094400.3	0	0	0	0	0	0	0	0	0	0	0	0	0	0	0	0	0	0
Solyc05g055250.2	9.0554	7.957	9.0378	23.8663	22.7456	28.6369	9.8782	10.7528	12.1815	10.7615	9.3928	11.2933	25.9861	32.384	21.6754	12.6437	14.1179	13.2078
Solyc04g071200.3	0	0	0	0	0	0	0	0	0	0	0	0	0	0	0	0	0	0
Solyc01g108940.2	0.0743	0	0	0.2106	0.0696	0.0816	0	0.0511	0.0964	0.2892	0	0	0.0407	0	0.0562	0.1055	0.16	0
Solyc10g061950.3	6.5281	6.0748	6.3333	6.6767	7.4308	6.7015	7.4405	6.7005	8.0654	8.3819	6.1612	6.9643	2.6045	4.2927	6.0182	5.5234	5.5669	6.4884
Solyc07g041260.3	0	0	0	0	0	0	0	0	0	0	0	0	0	0	0	0	0	0
Solyc04g049897.1	0	0	0	0	0	0	0	0	0	0	0	0	0	0	0	0	0	0
Solyc01g016880.1	0	0	0	0	0	0	0	0	0	0	0	0	0	0	0	0	0	0
Solyc10g039235.1	0	0	0	0	0	0	0	0	0	0	0	0	0	0	0	0	0	0
Solyc09g014765.1	0	0	0	0	0	0	0	0	0	0	0	0	0	0	0	0	0	0
Solyc11g071470.1	0.2471	0.888	1.5534	0.6672	0.5131	0.5142	1.0336	1.5374	1.0609	0.4496	1.7054	3.0918	1.5759	2.0413	2.8933	3.018	3.3175	2.6917
Solyc01g016890.1	0	0	0	0	0	0	0	0	0	0	0	0	0	0	0	0	0	0
Solyc04g081690.2	1.3277	4.0378	2.3067	8.1303	7.0373	8.8682	2.8422	3.4632	4.0857	0.276	0.8445	0.541	1.4718	1.8451	1.2274	0.5793	0.7598	0.6037
Solyc05g008620.4	0.251	0.1286	0.1855	0.6972	0.3912	0.5746	0.6327	0.0656	0	0.8493	1.464	2.1699	1.7613	2.0034	2.6231	0.9716	0.6528	0.6213
Solyc04g072810.4	7.5579	7.8207	9.024	22.1432	21.3032	19.951	13.931	14.7027	13.2291	5.6808	5.841	5.0434	13.9712	14.7558	12.8536	7.9555	6.8073	7.4728
Solyc11g005150.3	6.5361	11.3755	7.5832	8.1265	3.0276	2.581	4.5864	1.2781	2.0575	3.9275	15.7398	14.903	5.7821	11.9859	8.655	4.1878	9.6299	6.9881
Solyc07g006660.1	0.1342	0.0792	0.1467	0	0.0377	0	0.4229	0.224	0.3837	0.447	0.4223	0.6477	0	0.0045	0.0636	0.3059	0.1883	0.3579
Solyc01g105040.3	2.4124	1.8382	2.6294	3.3405	3.176	2.6787	4.789	3.9913	4.0146	2.0233	1.9345	1.787	2.6121	2.159	1.8994	2.7657	3.5604	2.8702
Solyc12g056671.1	0	0	0	0	0	0	0	0	0	0	0	0	0	0	0	0	0	0
Solyc01g017740.2	0	0	0	0	0.0541	0	0	0	0.071	0	0	0	0	0.2392	0	0	0	0.0774
Solyc06g048905.1	0.0277	0	0	0	0	0.0136	0	0	0	0	0	0	0.0589	0	0	0.039	0	0
Solyc11g010840.2	5.0259	4.2835	4.9094	12.7504	15.0856	14.2938	4.1839	5.6881	5.2256	3.6213	3.5133	3.9789	8.8038	8.0787	7.5252	3.9499	3.6942	3.397
Solyc12g035196.1	0.1538	0	0	0.0305	0.0781	0	0	0	0	0	0	0	0.114	0.3221	0.1215	0.1191	0	0.1621
Solyc03g031970.4	25.2675	31.4538	25.5232	62.8887	57.1594	58.0536	26.2169	20.2309	25.9131	19.168	21.2506	19.4324	39.1083	40.3031	32.7998	16.1625	18.0675	19.2692
Solyc06g073220.1	0.0674	0.0889	0.1466	0	0	0.1499	0	0	0	0.105	0.1509	0	0	0	0.0778	0	0	0
Solyc04g081120.1	0	0	0	0	0	0	0	0	0	0	0.0209	0.018	0	0	0.0316	0	0	0.0266
Solyc04g050010.2	6.608	1.1117	0.4325	1.3678	0.4411	0.2657	1.0561	1.7451	2.1811	0.1477	0.4214	0.2056	0	0.3501	0	0.2647	0.5556	0.3093
Solyc04g008220.4	1.6043	3.1816	3.1806	3.6708	3.1487	6.411	3.9035	3.2126	2.1248	1.1163	2.3425	2.9632	3.494	1.7415	1.2938	1.7272	1.873	1.6893
Solyc06g075820.1	0	0.1885	0	0	0	0	0	0	0	0	0.2305	0	0	0	0	0	0	0
Solyc06g060070.3	0.1651	0	0	0	0	0.0138	0	0	0	0.0258	0.0515	0	0	0	0.0317	0	0.0186	0.215
Solyc03g025117.1	0	0	0	0.1394	0	0.1439	0	0	0	0.0605	0.1247	0	0.3468	0.1648	0.2391	0.3	0.3678	0.1501
Solyc04g081130.1	0.1312	0.0708	0.2766	0.2898	0.0179	0.022	0.0291	0.1817	0.125	0.7209	1.599	0.8872	0.2216	0.2145	0.2863	0.616	0.5455	0.6009
Solyc03g119530.3	2.9775	11.2237	1.6979	13.8363	28.0366	17.0784	5.3033	6.7333	5.2155	1.1186	1.2789	1.0721	5.3398	4.343	4.7983	2.7545	2.1551	1.8622
Solyc01g073840.1	0.0284	0.0309	0.2282	0.2678	0.4583	0.2392	0.1091	0.1095	0.0305	0.1457	0.2627	0.2654	0	0	0.0618	0	0	0
Solyc02g085950.4	3688.7	2903.89	3346.52	2244.05	1606.83	1603.91	3531.51	2618.78	3197.88	7283.23	6842.84	8529.32	5469.21	5601.54	6278	6024.92	8013.03	8864.41
Solyc06g070920.3	0	0.0208	0	0	0	0	0	0	0	0	0	0	0	0	0	0	0	0
Solyc01g109135.1	0	0	0	0	0	0	0	0	0	0	0	0	0	0	0	0	0	0
Solyc11g008245.1	0	0	0	0	0	0	0	0	0	0	0	0	0	0	0	0	0	0
Solyc04g025120.2	24.3186	27.6576	26.4501	26.5461	30.2643	24.5935	28.5824	31.7829	28.9531	42.0109	30.9047	40.3765	35.4913	34.5602	35.62	35.3515	33.6754	32.9574
Solyc10g075173.1	0	0	0	0	0	0	0	0	0	0	0	0	0	0	0	0	0	0
Solyc08g078110.1	0	0	0.2982	0	0	0	0.107	0	0.476	0	0	0	0.204	0	0.245	0.0769	0	0
Solyc03g118840.3	73.3404	70.0388	75.3505	28.0377	23.1148	23.8816	77.6612	89.6681	86.7011	63.0432	64.5929	50.032	26.6821	25.5224	27.2575	56.8333	54.4749	47.9022
Solyc02g084850.3	0.3553	0.1906	0	6.3044	2.5669	1.6586	0.7073	0.6667	0.694	0.117	0	0	1.1819	0	0.4459	0.117	1.9577	0.8679
Solyc11g045510.3	8.613	8.9199	6.3861	13.6507	17.4164	15.3172	7.6224	7.8097	8.8523	5.9596	6.5125	6.1486	12.9872	13.1513	11.9652	6.8583	6.5667	5.6548
Solyc00g500227.1	0.0529	0.01	0.0548	0	0.0156	0.0425	0.0772	0	0.0224	0.0268	0.058	0.0069	0.02	0.0428	0.0097	0.0069	0.0235	0
Solyc01g109610.4	0.6138	0	0.4861	2.2898	1.5432	2.1702	0.9937	0.9362	0.8596	0.8375	0.3546	0.575	3.1644	3.1897	4.9373	1.0424	1.4309	1.0187
Solyc02g070180.3	4.2874	1.3887	1.9439	5.6762	5.5	4.0591	1.1638	0.8338	1.146	0.3601	1.3629	0.6387	1.8804	3.3346	1.463	0.6439	0.6409	0.2917
Solyc00g500376.1	0	0	0	0	0	0	0	0	0	0	0	0	0	0	0	0	0	0
Solyc11g072530.2	5.9064	7.3446	7.0591	10.2621	10.6523	11.231	6.846	7.085	7.45	7.0713	7.2777	7.3411	10.3399	11.0581	10.991	7.3006	9.8573	8.7466
Solyc03g061580.1	0	0	0	0	0	0	0	0	0	0	0	0	0	0	0	0	0	0
Solyc01g068630.3	0.4959	0.4014	0.3923	0.165	0.471	0.7721	0.3668	0.226	0.577	0.5058	0.3841	1.6688	0	0.0426	0.4075	0.2641	0	0.4513
Solyc01g011115.1	0	0	0	0	0	0	0	0	0	0	0	0	0	0	0	0	0	0
Solyc03g112760.3	43.3878	37.7361	35.902	58.8268	47.7651	52.7255	47.8225	36.2185	34.7518	29.8179	28.0314	28.3217	37.8819	28.6628	31.7303	36.0277	30.3173	30.5051
Solyc06g066370.4	106.623	66.5155	71.371	62.1575	88.7825	88.2176	21.0762	66.7608	71.3709	35.7922	52.8056	38.5634	13.9458	13.0916	12.4737	10.8759	14.5694	4.9346
Solyc10g084440.3	21.1567	15.3091	21.4844	5.6527	5.677	5.3961	22.009	23.9247	19.742	13.4818	13.0862	12.2149	4.504	4.0045	3.4897	11.2662	9.5105	11.7837
Solyc06g054360.2	0	0.3381	0.2285	0.6036	0.4032	0	0.2496	0.3915	0.3628	0.1731	0	0.3335	0	0.3753	0	0.3888	0.1917	0
Solyc02g093880.3	15.5618	20.8678	21.4219	22.0212	27.6865	23.0759	16.7416	21.2295	18.1769	16.0264	10.1462	10.5303	14.9699	12.7415	14.4885	13.4779	7.9882	9.8045
Solyc06g005740.3	0	0	0.0946	0.2341	0	0	0	0	0	0	0	0	0	0	0	0	0	0
Solyc09g064940.2	62.3849	45.6962	107.187	41.7159	92.5555	114.341	56.1375	87.2561	109.761	110.525	87.5422	62.9414	47.0958	36.9722	29.1019	67.3813	35.6609	33.4707
Solyc10g080840.1	10.7422	9.8117	10.0368	7.9778	7.5152	7.8357	15.101	17.953	19.8213	6.2493	7.6335	4.5299	9.6281	10.3305	12.0792	17.3707	11.8021	11.5949
Solyc00g500304.1	0.007	0	0	0	0	0.0491	0	0	0	0	0	0	0	0	0	0	0	0.0158
Solyc12g038220.3	0	0	0	0	0	0	0	0	0	0	0	0	0	0	0	0	0	0
Solyc08g074240.3	78.8632	86.9425	93.5767	123.137	137.102	137.33	104.345	103.173	97.3865	113.364	109.854	151.232	91.4772	97.0971	88.5946	93.3526	90.2849	107.16
Solyc09g015840.4	73.1196	83.9656	65.5455	43.991	45.6507	60.9115	31.5076	27.5481	29.0144	43.7441	66.4963	53.6578	52.6983	56.7671	48.221	44.7356	48.9187	49.02
Solyc06g053420.4	0.5729	0.2942	0.2473	0.9401	0.4388	0.4979	1.1863	0.6733	1.2253	0.3409	0.2841	0.4789	0.5303	0.6063	0.6476	0.5038	0.6531	0.4686
Solyc09g082800.3	8.8745	9.401	9.9249	9.7499	9.6832	8.9599	9.2435	8.3047	9.1803	7.9238	7.9146	7.6985	6.7481	7.3554	6.789	7.4322	8.169	6.8135
Solyc11g010350.2	0.4921	0.4751	0.4716	3.4011	2.3685	2.0104	1.2081	1.1889	1.0914	0.9348	1.0178	1.3087	2.5152	3.0761	3.1772	1.2677	1.3679	1.0388
Solyc06g061120.4	9.4537	12.2878	10.6735	9.3158	11.7487	11.7805	9.0715	10.695	9.5738	8.7975	7.6717	8.7677	8.6733	6.6756	5.1569	8.0466	7.389	7.0153
Solyc11g007180.3	0.2042	0	0.0311	0	0.0753	0	0	0	0	0.0941	0	0	0	0	0	0	0	0
Solyc08g075260.1	0	0	0	0	0	0	0	0	0	0	0	0	0	0	0	0	0	0
Solyc06g074250.3	29.6132	33.6683	36.7629	44.8095	49.9722	46.8269	36.1471	38.939	42.2857	25.0744	24.1542	24.8726	30.7783	29.0855	27.3147	24.2414	24.0992	24.1592
Solyc10g047180.1	0	0	0	0	0	0	0	0	0	0	0	0	0	0	0	0	0	0
Solyc04g017877.1	0	0	0	0	0	0.0557	0	0	0	0	0	0	0	0	0	0	0	0
Solyc06g061130.4	1.9417	2.6651	1.9088	7.8842	6.711	6.7807	2.6127	4.0558	3.0025	5.4329	5.0668	7.7116	10.1314	10.1151	8.2161	5.8415	4.9127	4.9076
Solyc11g042990.2	13.664	16.5836	15.946	19.2125	25.3063	20.8498	14.4095	12.5786	12.2795	12.2767	12.148	11.3055	15.0386	13.8034	12.1288	10.991	11.5819	10.4819
Solyc08g075270.1	0	0	0	0	0	0	0	0	0	0	0	0	0	0	0	0	0	0
Solyc02g082940.3	0	0	0	0	0	0.0433	0.0839	0	0	0	0.1648	0.0272	0	0.3964	0.1463	0	0	0
Solyc03g020010.1	1.756	0	0.4439	0.8326	7.2206	14.3823	0.7358	0.4974	2.9851	0.679	0.9126	0.1054	2.249	1.8051	6.3561	2.4567	0.4586	0.4679
Solyc09g015370.1	1.1318	0.6234	0.955	1.1251	1.4216	1.2539	1.4906	0.6031	0.8688	0.8375	1.1367	1.4175	1.2142	1.0785	2.3457	1.0343	0.792	1.4611
Solyc01g090140.3	0	0	0	0.261	0.3485	0	0.0482	0	0	0	0.082	0.2926	0.1748	0.2855	0.1963	0.0615	0	0
Solyc12g094740.3	0	0	0	0	0	0	0	0	0	0	0	0	0	0	0	0	0	0
Solyc09g064260.1	0	0	0	0	0	0	0	0	0	0	0	0	0	0	0	0	0	0
Solyc03g113640.4	6.5411	8.6639	5.965	10.5867	12.601	10.4463	7.517	7.0993	7.133	4.9376	5.9031	5.3655	6.7087	7.4012	5.9186	5.3472	5.451	4.7161
Solyc02g080850.1	0	0.1475	0.0809	0.6852	0.9013	0.4449	0	0.3141	0.1226	0.0208	0	0.0333	0	0	0	0	0	0
Solyc01g110590.4	23.2899	12.8811	17.7912	4.9174	5.0533	3.8889	34.5275	19.2671	13.131	15.3578	18.5053	12.89	1.1842	0.9166	0.4339	2.0369	4.0263	3.822
Solyc11g021360.3	0	0.0493	0	20.2473	9.6795	10.4255	0.8381	0.8432	0.2269	0.2278	0.1684	0.7595	15.6742	22.0671	14.3376	1.0631	1.3103	0.9597
Solyc03g082670.3	2.5336	0.9861	1.0195	11.0067	12.9187	8.8546	2.6818	2.0982	2.1347	1.8292	1.3588	1.7753	5.6695	5.9193	5.9899	1.5075	1.6897	2.0408
Solyc01g080320.3	0	0.1273	0	0.2265	0.1804	0.1707	0.1906	0.5798	0.0615	0.4822	0	0.5501	0	0.1778	0	0.5804	0.1649	0.188
Solyc03g095880.1	0	0	0	0	0	0	0	0	0	0	0	0	0	0	0	0	0	0
Solyc12g056585.1	0	0	0	0	0	0	0	0	0	0	0	0	0	0	0	0	0	0
Solyc02g082460.3	17.6381	23.0799	20.1593	24.3174	27.2789	27.4671	16.3887	17.4054	19.4057	10.5216	9.8826	10.2445	13.6188	14.0613	11.0104	10.024	9.6727	9.7949
Solyc03g034000.3	18.5349	13.8487	13.5536	29.1713	24.811	23.8107	8.2128	8.8299	7.0319	5.9396	11.1413	7.075	5.6765	5.7368	2.8298	3.3427	3.0173	2.8006
Solyc02g068890.3	1.0957	1.2224	0.8404	3.0673	2.8154	3.2146	1.8109	1.6742	2.2436	1.3961	1.3651	1.4932	2.8623	3.2514	3.473	1.8856	2.0089	1.7131
Solyc12g056490.1	1.1302	1.6228	1.0563	3.8817	2.827	2.9609	2.5887	2.445	2.4076	1.0403	1.1488	1.775	1.8437	2.7999	2.124	1.3882	1.8674	2.324
Solyc05g052020.3	4.893	5.4609	4.8481	10.8756	15.8746	15.9169	5.155	6.175	5.6005	2.9972	2.9635	2.2993	7.6866	7.4569	6.3852	3.5464	3.4858	3.4485
Solyc09g089650.1	16.4944	15.0687	14.9378	17.014	18.7811	20.6829	25.4669	43.922	42.8836	18.3217	24.1583	13.9518	14.0994	9.9418	9.4961	25.5886	21.9545	24.2417
Solyc07g020870.3	0.0281	0.2139	0.2646	0.2314	0.2143	0.2987	0.0356	0.0603	0.1672	0.1425	0.0492	0.0749	0.3382	0.1268	0.4677	0.4005	0.3005	0.3631
Solyc10g049560.3	0.6461	0.3911	0.879	1.1817	1.5486	2.0001	0	0.3368	0.528	0.3522	0	0	0.8313	0.9955	0	0	0.2895	0.3003
Solyc01g079090.4	37.9427	38.137	34.3075	91.4818	80.9476	81.2316	47.0067	45.761	45.5278	56.9326	62.4629	72.0163	87.4145	82.6526	84.212	62.7721	59.6829	71.0321
Solyc08g065443.1	0	0	0	0	0	0	0	0	0	0	0	0	0	0	0	0	0	0
Solyc05g005670.1	1.1724	1.3379	1.9452	2.3617	2.6343	1.4768	2.2131	1.7999	2.7826	3.8181	5.2394	3.255	0.7746	0.9267	0.8259	0.7991	1.0447	0.6758
Solyc10g083110.3	6.0602	7.6889	5.5193	12.1033	15.3136	13.9536	7.582	7.7427	6.9886	6.759	6.879	10.1225	11.8723	11.9556	11.2858	8.1447	7.7758	6.3686
Solyc06g065100.3	9.9524	10.5231	11.3058	55.0144	34.7118	25.1303	45.0575	43.1906	44.8879	7.0038	7.0968	6.9893	13.9197	16.5035	10.5479	10.4158	10.0436	8.4592
Solyc08g023600.1	1.9923	1.0798	0.9492	1.7398	2.304	1.8754	1.1809	0.7953	1.3323	0.6767	0.5422	0.9972	1.0417	0.9481	0.5894	0.9338	0.5209	0.4573
Solyc11g040225.1	0	0	0	0	0	0	0	0	0	0	0	0	0	0	0	0	0	0
Solyc06g060400.3	82.6219	82.8259	90.6904	99.2968	120.168	127.542	78.885	71.2303	74.0046	90.6223	86.9837	116.818	77.4895	73.3623	71.6713	74.0583	70.8148	83.1372
Solyc02g087120.4	2.1997	0	1.7535	0	0.2323	0.1035	0.0298	0	0	4.1069	0	0	0	1.3262	0	3.5475	2.0443	1.9058
Solyc04g009800.3	16.016	27.7626	26.528	16.4038	20.6577	20.9133	10.3671	10.234	12.6245	16.0855	18.8706	15.998	17.9805	15.0009	14.6795	11.8249	11.2047	9.9518
Solyc01g057113.1	0	0	0	0	0	0	0	0	0	0	0	0	0	0	0	0	0	0
Solyc10g048040.1	0	0	0	0	0	0	0	0	0	0	0	0	0	0	0	0	0	0
Solyc04g012120.3	85.8075	108.436	123.081	77.5722	97.0177	101.201	95.8928	98.649	108.469	147.2	163.576	165.507	113.438	118.593	134.761	124.918	118.755	129.494
Solyc01g020440.3	3.6325	2.7116	4.219	5.5114	6.3037	6.2187	3.0776	2.8153	3.684	6.4491	4.2663	7.6287	6.497	6.8086	5.4602	3.82	2.5201	4.6361
Solyc03g083960.3	52.5449	68.776	53.0285	17.7538	12.2044	10.7748	53.9088	40.9248	44.7431	34.7855	44.5109	32.971	18.7903	20.8366	19.6263	38.5286	37.7365	36.7936
Solyc03g079870.1	0.0221	0.1223	0.7146	0.3587	0.1094	0.081	0.4977	0.0558	0.1199	0	0.2812	0.13	0.1967	0.2995	0.5872	0.1737	0.1827	0.2326
Solyc01g111740.3	0.7162	0.8343	0.639	2.0949	0.8118	1.3334	1.7241	1.4045	1.05	0.7679	1.0905	1.2001	0.924	1.5168	0.8729	0.9333	0.9465	1.0076
Solyc02g068420.4	57.0152	59.4796	55.1653	62.628	78.578	61.2146	53.8438	57.7079	45.5152	32.9982	36.7106	32.709	30.3304	30.0754	23.1633	24.3756	22.1897	23.8242
Solyc01g150100.1	0	0.0316	0	0	0	0	0	0.0946	0.0897	0.1839	0	0.0633	0	0	0.13	0	0.1364	0
Solyc12g088760.1	3.8151	7.3804	7.9509	10.4152	7.5845	10.955	14.1626	12.3795	11.0492	5.8739	6.9796	6.8828	12.0384	11.1519	12.4089	13.3876	15.312	13.846
Solyc02g090040.2	2.6149	0.8779	2.3981	0.7348	1.4015	1.4479	0.7613	3.0908	0.453	4.3766	3.8683	2.1597	5.1395	2.0241	2.0383	4.2319	2.3963	2.366
Solyc07g064710.3	1.2672	1.6204	1.3546	2.7681	3.2893	3.6499	1.1842	1.4094	1.4884	1.2775	1.3473	1.9981	2.6343	2.6141	2.3094	1.4793	1.4289	1.356
Solyc11g066410.2	97.2467	97.2609	102.758	181.966	134.761	140.529	149.275	126.87	114.117	300.655	263.748	362.908	263.38	223.297	321.766	256.503	173.788	270.135
Solyc07g062910.3	4.4855	4.5539	4.0213	5.8282	6.2245	7.0247	4.2913	4.2592	4.4912	3.4063	2.9047	3.6733	3.8908	3.7138	3.2431	4.3627	3.4098	4.1658
Solyc10g150138.1	0	0	0	0	0	0	0	0	0	0	0	0	0	0	0	0	0	0
Solyc04g009490.1	0	0	0.0539	0	0	0	0	0	0	0.1053	0	0	0	0.0404	0	0.0192	0.0856	0
Solyc04g071675.1	0	0	0	0	0	0	0	0	0	0	0	0	0	0	0	0	0	0
Solyc03g117830.2	0	0.3623	0.0465	0.4071	0.148	0.1398	0.2989	1.0656	0.2743	0.0854	0.3452	0.2896	0.4933	0.2369	0.1497	0	0	0.2304
Solyc06g005460.1	0	0	0	0	0	0	0	0	0	0.284	0	0	0.0681	0	0	0.1571	0	0
Solyc03g114160.1	0.6504	1.8819	1.9364	0.6405	0.8142	0.528	0.4148	0.6836	0.9447	1.4624	1.1474	0.5236	0.1387	0.1011	0.244	0.3332	0.112	0.3182
Solyc03g082945.1	7.6369	5.6219	6.3131	2.1551	0.8455	0.9818	4.6895	3.4588	2.9104	9.7728	20.1117	21.4009	5.5736	6.5089	10.0969	6.3829	12.9656	11.7246
Solyc06g082400.1	0	0	0	0	0	0	0	0	0	0	0	0	0	0	0	0	0	0
Solyc04g010180.4	20.7185	22.5708	24.8459	15.1556	18.1964	14.5792	8.4108	9.3792	11.1479	16.4351	20.1577	15.6817	11.9551	11.2555	11.7536	9.6394	10.5462	13.7368
Solyc02g005305.1	1.7708	3.3002	2.0879	3.4831	2.9318	3.5398	1.7628	2.1472	2.6737	2.2266	2.3427	1.8361	2.519	3.0948	1.9682	1.9433	1.0457	1.3121
Solyc08g062920.3	71.9974	80.9597	87.7794	87.0823	107.146	105.525	78.2929	71.7005	74.285	94.8984	94.3504	108.252	79.9666	80.4522	82.1177	91.1581	85.4168	84.8844
Solyc03g083210.3	4.5125	4.4337	4.8913	13.8823	13.0013	11.7912	6.7881	7.929	8.1353	4.7819	4.6239	5.4276	15.5581	16.848	14.6805	8.7169	9.9701	6.7601
Solyc07g055940.3	2.7181	2.2459	2.564	4.5642	5.6932	4.1696	4.747	4.1518	3.7484	1.594	1.7158	1.9366	3.2046	3.9357	3.6639	3.033	3.2636	1.759
Solyc05g023733.1	0	0	0	0	0	0	0	0	0	0	0	0	0	0	0	0	0	0
Solyc12g005950.2	33.4494	35.0458	34.2259	23.9207	29.9521	29.9698	33.4621	34.6569	32.5187	36.6905	32.8005	31.2136	15.1698	12.3516	11.1421	19.0663	18.7238	18.8204
Solyc01g098360.1	0	0	0	0	0	0	0	0	0	0	0	0	0	0	0	0	0	0
Solyc03g119720.4	21.5639	25.5	21.5922	19.7806	24.2081	21.2415	20.5217	23.0235	18.3453	16.6357	19.4121	14.8957	12.5198	10.6374	10.269	9.8826	10.5891	9.9409
Solyc09g059673.1	0	0	0	0	0	0	0	0	0	0	0	0	0	0	0	0	0	0
Solyc06g072910.2	0	0	0	0	0	0	0	0	0	0	0	0	0	0	0	0	0	0
Solyc08g067140.1	0	0	0	0.0413	0	0.0272	0	0.0956	0	0	0	0	0.0489	0	0	0.0137	0	0
Solyc08g078610.4	10.8474	11.5372	12.4438	19.5082	19.1721	18.0712	16.4626	15.1107	14.2922	8.869	8.7129	9.1442	11.9207	12.4468	11.4112	9.8238	9.7305	9.3702
Solyc00g500041.1	1.0524	1.1412	1.2172	3.3677	3.446	2.5864	5.503	5.5531	2.9495	0.6664	0.7522	0.6736	0.3429	7.4037	0.8435	0.8968	0.9051	2.7078
Solyc09g018410.3	0	0	0	0	0	0	0	0	0	0	0	0	0	0	0	0	0	0
Solyc01g097820.4	3.2905	4.3496	4.021	6.8308	5.9171	8.0118	7.108	5.4999	4.823	5.7675	4.0635	5.1445	7.5429	6.0907	6.732	6.9211	5.6517	5.801
Solyc04g054143.1	0	0	0	0	0	0	0	0	0	0	0	0	0	0	0	0	0	0
Solyc11g068820.3	242.196	214.7	223.409	287.789	230.528	242.227	269.807	244.91	231.505	451.374	391.348	491.616	358.193	323.089	376.587	354.971	328.722	398.946
Solyc01g014373.1	21.1267	20.483	22.7822	8.7271	7.1605	7.2605	35.0609	27.6198	23.4313	15.7836	16.2955	15.6215	5.1645	3.848	4.6391	19.9255	15.6309	13.5466
Solyc09g092283.1	0	0	0	0	0	0	0	0	0	0	0	0	0	0	0	0	0	0
Solyc07g020965.1	0	0	0	0	0	0	0	0	0	0	0	0	0	0	0	0	0	0
Solyc11g032140.1	0	0	0	0	0	0	0	0	0	0	0	0	0	0	0	0	0	0
Solyc06g082020.4	0	0	0	0	0	0	0	0	0	0.2978	0.1097	0.1704	0	0	0.2887	0.078	0	0.1346
Solyc01g109440.2	0.4258	0.238	0.0975	0.5581	0.9376	0.808	0.3277	0.6453	0.1824	0.3811	0.5189	0.2864	0.5226	0.2259	0.556	0.4734	0.6532	0.6193
Solyc11g065935.1	0	0	0	0	0	0	0	0	0	0	0	0	0	0	0	0	0	0
Solyc10g005335.1	11.5448	13.6696	9.8317	9.1884	7.3568	8.2591	10.9546	9.3282	11.8953	5.8394	8.3415	5.6637	4.9621	4.9369	3.9609	9.4957	7.1258	9.0314
Solyc11g070183.1	6.4388	6.7586	4.5904	7.6244	8.5598	8.9669	6.6308	7.3815	5.9183	6.4371	4.298	4.8185	6.412	5.6569	4.944	5.7948	5.2607	4.7181
Solyc09g065565.1	1.8731	0.7463	0	0	0	0	0	0.3404	0	0	0	0	0	0	0	0.5835	1.0897	2.261
Solyc07g055110.3	0	0.1081	0	0.2294	0.0382	0	0	0.1844	0	0.1325	0.041	0.4679	0.1003	0.437	0.1774	0.0304	0.1534	0.0543
Solyc06g059740.4	0.1803	0.3175	0.0279	0.967	2.1926	1.0784	0.1126	0.0736	0	0.244	0	0.2126	0.7033	1.2125	0.4601	0.3419	0.1525	0.1605
Solyc10g005900.3	8.6897	7.7298	8.0969	12.0241	13.751	13.0387	10.3915	9.3077	9.8756	8.1875	7.3636	9.0902	11.0323	11.4179	12.3343	9.4655	9.2975	10.1251
Solyc01g049950.1	0	0	0	0	0	0	0	0	0	0	0	0	0	0	0	0	0	0
Solyc02g063373.1	0	0	0	0	0	0	0	0	0	0	0	0	0	0	0	0	0	0
Solyc02g065510.1	0.2121	0.6874	0.5079	2.3383	2.1162	2.2363	0.625	0.7928	0.4971	0.3557	0.6983	0.3303	1.6656	2.1304	1.7346	0.351	0.5029	0.5905
Solyc04g050950.3	1.4778	0.1215	0.8096	0.7743	1.2134	1.0449	3.4706	2.7721	1.957	0.6967	0.1367	0	1.079	0	0.207	0.6058	0.5846	0.1856
Solyc05g052700.4	21.2476	21.7631	19.3203	12.7582	14.3057	15.8155	24.9614	26.1506	19.7921	26.2738	26.3948	24.1866	13.1994	11.7347	12.281	18.8528	16.247	18.5826
Solyc03g114770.3	0.0832	0.049	0	0.232	0.0228	0.1097	0	0.1375	0.0805	0.0733	0.1652	0.0726	0.2513	0	0.3391	0	0.1619	0
Solyc05g150115.1	0	0	0	0	0	0	0	0	0	0	0	0	0	0	0	0	0	0
Solyc09g073015.1	0	0	0	0	0	0	0	0	0	0	0	0	0	0	0	0	0	0
Solyc03g123670.3	0.2303	0.1551	0.032	0.1814	0.1164	0.1	0.2866	0.1284	0.0614	0.2096	0.3452	0.3498	0.1891	0.5435	0.0763	0.0295	0.1826	0
Solyc10g050700.1	0	0	0	0	0	0	0	0	0	0	0	0	0	0	0	0	0	0
Solyc07g032105.1	0	0	0	0	0	0	0	0	0	0	0	0	0	0	0	0	0	0
Solyc02g067700.1	5.6007	3.9831	5.5772	1.9216	0.3723	1.8115	5.1215	2.8768	3.7956	2.398	5.0321	4.1668	0.7886	0.8796	0.4601	0.7716	2.7293	2.5795
Solanum_lycopersicum_newGene_812	0	0	0.0255	0.042	0	0.0262	0.1102	0.009	0.0339	0.5908	0.9573	0.3868	0.819	1.0672	1.1112	0.7879	1.0322	0.6238
Solanum_lycopersicum_newGene_811	0	0	0	0	0	0	0	0	0	0	0	0	0	0	0	0	0	0
Solanum_lycopersicum_newGene_810	1.4206	0.6174	1.0934	1.3545	0.4908	2.8405	0.7387	0.1574	1.3177	2.054	2.2363	2.292	2.2487	1.3221	1.9041	2.4197	1.4671	1.7847
Solyc09g014642.1	0	0	0	0	0	0	0	0	0	0	0	0	0	0	0	0	0	0
Solanum_lycopersicum_newGene_868	0.5081	0.4257	0.3695	8.691	6.77	9.9086	0.6125	0.6335	0.7757	0.7357	0.4115	0.3975	7.3807	7.1772	7.4112	1.1822	0.7658	0.8468
Solyc02g030100.4	5.792	5.9023	5.6849	7.7493	8.3716	7.5296	5.0334	3.7056	5.1645	3.4898	5.5066	4.9089	8.0082	8.6965	7.7816	3.885	6.106	4.6993
Solyc07g054280.1	0.3071	0.5164	0.2054	0.2373	0.0927	0.0641	0.5254	0.2171	0.3725	0.1377	0.2391	0.2629	0.1948	0.2647	0.941	0.3746	0.3386	0.5936
Solyc10g005260.3	60.7209	65.6771	67.6093	91.2073	85.1101	76.6637	87.516	85.886	68.7139	41.6056	39.3865	43.8062	29.9785	27.2482	24.84	28.9456	30.1293	30.4544
Solyc07g019510.4	0	0	0	0	0	0.0144	0	0	0.0166	0.0053	0	0	0	0	0	0.0211	0	0
Solyc09g014820.3	0.2477	0.161	0.3024	0	0.0669	0	0	0	0	0.2173	0.1214	0.4583	0	0.4887	0	0	0	0
Solyc03g117510.4	1.8311	1.9928	2.087	6.2551	4.0115	5.0604	2.9275	2.3908	2.3447	3.3227	3.2617	5.1699	6.1155	6.4031	6.0333	3.5595	2.9217	3.5896
Solyc06g074480.3	3.792	3.8182	2.7864	5.6177	6.7025	6.2937	4.1103	4.2354	4.7634	2.4074	2.0341	2.2884	4.9311	4.532	4.1836	2.7614	2.0488	2.4811
Solyc08g065850.1	80.4368	49.438	62.7496	61.0258	31.8292	32.6347	131.727	68.98	81.6209	64.9988	86.6692	86.9903	69.982	94.1467	69.7329	87.4533	131.076	121.458
Solyc10g085420.3	234.455	472.46	343.355	43.9572	68.4013	63.4635	25.721	87.1768	101.23	176.629	188.194	153.067	5.2497	3.8989	3.2434	11.0295	9.8533	5.8727
Solyc01g096360.3	10.3499	10.1488	10.0035	51.3216	30.6978	33.1582	29.9703	17.9144	18.594	9.1197	14.3086	19.8799	51.9781	49.6348	44.7374	26.0964	32.1734	30.5134
Solyc10g009610.2	0	0	0.0518	0	0	0.0568	0	0.0194	0	0	0	0	0	0	0	0	0	0
Solyc12g032960.1	0	0	0	0	0	0	0	0	0.0246	0	0	0	0	0	0	0	0	0
Solanum_lycopersicum_newGene_860	3.6846	3.2879	3.3698	5.3639	5.5077	6.6519	5.2209	3.0287	3.9359	2.8735	2.3753	3.1677	6.3431	5.373	6.2336	4.4875	4.9313	4.3891
Solyc09g014830.3	0	0	0	0	0	0	0	0	0	0	0	0	0	0	0	0	0	0
Solyc08g081170.4	1.6287	1.4574	2.1564	11.2299	12.5201	11.3745	1.7267	1.3158	2.1237	4.0803	3.684	5.1984	12.6929	11.0884	10.8477	5.6033	4.6567	2.7195
Solyc03g116020.3	18.3707	19.8467	15.6218	14.333	19.3334	16.3001	13.6301	15.6797	13.6421	15.2673	11.8666	13.3988	9.6931	9.8324	7.2457	10.2573	9.0088	9.7703
Solyc09g005220.3	0.2691	0	0.1613	0.2573	0.1748	0.472	0.3369	0.2589	0.2962	0	0	0	0.1829	0.1682	0.0606	0.2876	0.2452	0.2015
Solyc08g150143.1	0	0	0	0	0	0	0	0	0	0	0	0	0	0	0	0	0	0
Solyc02g079980.3	1.6841	2.3812	1.9652	6.3503	6.0337	6.3185	3.6507	4.0734	1.8478	0.8503	1.3212	0.7008	3.354	2.3035	2.2541	1.3994	0.9599	1.3247
Solyc05g007670.4	16.7106	18.9138	20.3604	21.356	22.7673	21.5246	18.7131	16.6677	18.7812	14.5191	15.8789	14.0677	16.2496	16.1183	16.1443	13.1941	14.7228	13.5348
Solyc06g050800.4	4.0238	1.827	1.3503	5.0815	4.5785	5.517	3.4085	4.5133	3.904	1.1332	1.4744	0.5629	2.8886	1.7128	0.9058	3.1555	2.708	2.4717
Solyc02g089240.3	15.7987	12.8966	18.6343	30.2149	34.8962	36.3636	17.5735	22.9917	18.2153	19.7219	18.462	19.3088	23.487	19.4426	19.0695	18.6487	19.3821	16.8402
Solyc10g006040.1	30.5002	33.9744	32.2224	19.4236	20.8159	23.5399	35.5275	40.0548	33.3224	39.4687	39.8665	40.7972	23.68	18.8801	23.2535	21.7507	19.0873	19.0811
Solyc10g007000.3	1.6934	3.2122	3.6202	2.1868	3.3614	3.3483	1.254	1.7608	1.7676	2.6971	1.6925	1.911	0.9937	1.0512	1.7026	1.2852	0.7076	0.8546
Solyc03g058960.1	0	0	0	0	0	0	0	0	0	0	0	0	0	0	0	0	0	0
Solyc02g072050.2	0.0498	0.0971	0	0.2195	0.0625	0	0.1931	0.1541	0.125	0.0646	0.0274	0.0673	0.0229	0.032	0.17	0.0287	0.0479	0.2014
Solyc08g077310.3	18.1909	18.3229	18.3645	23.1938	23.0765	23.7533	19.845	17.1449	18.707	13.6803	12.7206	13.148	18.6369	16.1946	15.8944	14.5668	14.4901	13.0773
Solyc04g072350.1	0	0	0	0	0	0	0	0	0	0	0	0	0	0	0	0	0	0
Solyc01g097300.4	9.1024	8.3729	10.3147	15.021	12.7134	14.1087	8.3978	8.9137	8.3779	8.929	9.3159	12.1766	14.7949	17.3979	15.3521	10.9556	12.4643	12.0007
Solyc00g500029.1	0.7121	0.9234	0.5925	1.8652	1.596	1.0163	2.5109	2.011	2.715	0.529	0.6714	0.3328	0.6778	2.611	0.5119	0.4852	0.4368	1.2865
Solyc08g080800.1	0	0	0	0	0	0	0	0	0	0	0	0	0	0	0	0	0	0
Solyc12g035270.2	0	0	0	0	0	0	0	0	0	0	0	0	0	0	0	0	0	0
Solyc09g018800.2	0	0	0	0	0	0	0	0	0	0	0	0	0	0	0	0	0	0
Solyc06g050360.3	1.6771	1.6308	1.0969	3.7402	4.1014	4.7035	1.2128	1.2212	1.2448	1.3306	0.8219	1.3991	2.4015	3.81	2.9993	2.3855	1.8367	2.539
Solyc06g008030.3	2.7045	10.1979	7.2746	183.992	193.092	176.562	0.9964	1.5118	1.3985	1.7613	2.9572	3.1157	60.3838	46.2578	34.4126	0.7909	1.0324	0.8986
Solyc04g050865.1	0	0	0	0	0	0	0	0	0	0	0	0	0	0	0	0	0	0
Solyc05g006690.3	0.4535	0.1736	0.3835	0.6973	0.3309	0.135	0.8234	0.8388	0.961	0.4206	0.5516	0.2714	0.8274	0.7672	0.8962	0.5333	0.4933	0.7243
Solyc09g082220.1	4.3818	3.1645	10.4318	3.4464	7.3101	8.7473	0.5363	3.0475	3.5759	5.8391	5.2866	5.0745	3.4524	4.3865	3.293	2.5009	1.7055	1.8324
Solyc09g018490.4	2.6236	1.6738	1.9699	1.1406	1.0014	0.7588	2.8436	2.1549	1.8015	2.0566	2.1523	1.9515	1.0633	1.2493	1.1699	1.1615	0.9787	1.9564
Solyc01g005420.2	13.5069	20.5006	15.9769	23.8903	28.4416	21.6248	4.4686	12.08	9.8702	9.7049	8.365	9.6933	8.3806	9.4782	10.4308	2.886	2.2385	2.4532
Solyc05g051030.3	23.4156	21.5268	24.5436	35.8505	46.8908	42.8812	24.7502	30.789	27.225	16.2743	16.0722	17.3942	18.6478	14.9234	13.2446	12.1743	11.9027	14.5983
Solyc10g018140.2	0.0364	0.1371	0.1045	0.0623	0.173	0.2127	0.3241	0.1307	0.3538	0.4815	0.3656	0.1067	0.1256	0.0966	0.1685	0.1744	0.1483	0.139
Solyc10g150104.1	0.0295	0.1504	0	0.21	0.1881	0.1429	0.0445	0.0932	0.1971	0	0.0638	0.0378	0.1615	0	0	0.0695	0.067	0.0816
Solyc03g063320.3	6.2677	6.1099	5.5591	9.9132	9.9409	8.8483	6.0467	5.9769	6.3056	4.652	5.9291	6.8988	6.1245	6.2448	6.3623	4.8242	5.4953	3.9964
Solyc11g066050.1	8.8199	8.6795	8.9708	8.517	7.573	8.0691	9.1691	10.9933	7.8972	7.4758	8.4788	7.9341	8.112	7.5176	6.2177	5.0652	6.1298	6.1451
Solyc05g015538.1	0	0	0	0	0	0	0	0	0	0	0	0	0	0	0	0	0	0
Solyc06g005800.3	7.9402	9.0907	10.6226	11.3679	11.2521	11.5657	11.0253	9.2743	8.9717	11.2964	12.0031	12.0721	13.5988	13.0757	13.5092	10.8793	10.1426	10.319
Solyc10g055770.2	0.1225	0.345	0.4771	4.664	5.089	3.0153	1.1366	2.1372	1.8325	0.3717	0.299	0.3101	9.1398	11.2367	11.588	3.7164	5.8939	4.1893
Solyc08g068790.3	4.1583	3.3157	3.0014	2.3037	2.0814	1.7543	3.8273	4.633	4.4646	0.346	1.7969	1.091	0.1113	0.1123	0.4979	0.1779	0.1906	0
Solyc06g009410.3	0	0	0	0	0	0	0	0	0	0	0	0	0	0	0	0	0	0
Solyc12g040470.2	0.6374	0.6725	0.6329	0.1564	1.379	0.5313	0.3274	0	0.4344	0	0	0	0	0	0	0	0	0
Solyc10g083850.3	0.0229	0	0.0966	0	0	0.0123	0	0	0	0	0	0	0.0135	0	0	0	0	0
Solyc02g090330.3	4.1072	1.9497	3.3015	4.1569	4.4488	3.6348	2.1091	5.392	3.4277	5.6281	4.3684	2.7629	6.8149	4.9592	4.8504	5.9731	2.9165	3.2884
Solyc09g011750.3	3.9938	2.4766	3.9891	4.4544	2.916	2.1971	5.3015	1.4179	3.1404	3.6535	7.3924	7.7319	4.7524	7.479	5.7544	4.1012	6.8188	7.5678
Solanum_lycopersicum_newGene_2221	1.4084	1.5869	1.4548	2.503	2.6156	2.4997	1.7014	2.1296	1.2055	1.1587	1.1415	1.1166	0.9062	0.6146	0.6969	0.6841	0.5542	0.8348
Solyc01g008475.1	0	0	0	0	0	0	0	0	0	0	0	0	0	0	0	0	0	0
Solanum_lycopersicum_newGene_2225	0	0	0	0	0	0	0	0	0	0	0.4749	0	0.0852	0	0	0.0979	0	0.3382
Solanum_lycopersicum_newGene_2224	0.2343	0.1909	0	0.1896	0.1418	0	0.3745	0.2081	0	0.4845	0.249	0.8198	0.0657	0.0971	0.0563	0.3995	0.3076	0.656
Solyc03g063310.1	0	0	0	0	0	0	0	0	0	0	0	0	0	0	0	0	0	0
Solyc12g013840.3	54.3489	51.8004	53.438	13.484	10.1754	11.7292	61.0653	52.9727	53.6268	54.9787	58.0679	50.5964	8.8454	8.7396	9.7763	45.0202	42.9492	40.2815
Solyc05g055660.3	0.1002	0.2212	0.4602	0.142	0.5255	0.6927	0.0395	0.0641	0	0	0	0	0	0	0.0975	0	0	0
Solyc05g018390.3	6.824	7.2406	7.4532	7.9934	7.9972	6.7102	9.4517	8.7805	8.2191	4.8445	5.7952	6.2348	5.3294	5.386	4.4901	5.6911	6.0814	5.5453
Solyc09g059290.4	7.8337	5.4637	6.3576	9.3572	7.6007	7.4323	8.4568	6.2062	8.4234	5.697	6.6678	6.6006	4.8584	6.2782	5.9952	6.2736	5.609	6.1569
Solyc08g059715.1	3.7347	3.5409	2.3957	5.0661	5.1081	5.7001	2.5155	3.7197	4.4583	2.8469	3.0934	1.8598	5.0382	5.4422	4.6935	3.3572	2.4816	3.3799
Solyc09g066100.3	52.0714	32.5403	32.6667	221.136	170.714	211.246	117.338	66.8468	55.2088	28.0984	40.8039	52.795	150.285	154.912	161.117	73.9716	60.7936	69.2772
Solyc07g055790.3	0	0	0	0	0	0	0	0	0	0	0	0	0	0	0	0	0	0
Solyc01g009145.1	7.413	7.3283	7.3727	10.4845	11.9061	11.4615	11.966	8.9793	9.5714	11.9356	12.2466	11.5965	14.356	13.7631	15.2164	10.7188	12.7864	12.2248
Solyc04g015270.3	47.4749	47.3592	41.8807	63.6629	53.1529	54.3284	62.2892	43.8962	46.1542	43.238	55.037	47.4369	51.094	50.6479	49.9424	49.8964	59.1883	52.1962
Solyc01g087850.2	2.4534	7.7377	4.2864	37.9569	57.2091	53.2804	5.5717	6.0459	7.4696	2.5962	3.1736	5.0719	32.2474	36.5068	39.4451	5.7648	6.1025	7.4911
Solyc10g008390.3	2.3992	4.0751	3.3379	5.1251	5.2077	6.9356	2.8841	3.9528	5.7895	3.006	2.9085	3.6081	8.5263	10.1813	9.5989	5.3307	6.7564	5.8088
Solyc12g019760.1	0	0	0	0	0	0	0	0	0	0	0	0	0	0	0	0	0	0
Solyc12g056672.1	0	0	0	0	0	0	0	0	0	0	0	0	0	0	0	0	0	0
Solyc03g051650.1	0	0	0	0	0	0	0	0	0	0	0	0	0	0	0	0	0	0
Solyc08g078440.3	4.3754	6.1177	4.9739	3.7943	5.4094	5.79	1.177	1.7282	2.1743	4.5119	3.2588	3.5775	2.0147	2.981	2.3421	1.601	1.7317	1.7813
Solyc03g026115.1	0	0	0	0	0	0	0	0	0	0	0	0	0	0	0	0	0	0
Solyc02g082010.3	7.211	7.2145	8.381	12.8224	12.2993	11.7047	12.214	11.7944	12.2845	6.4553	6.7808	6.8949	12.1128	11.6498	11.5357	10.2707	10.2474	11.4845
Solyc12g019770.1	0	0	0	0	0.2708	0.0255	0	0	0	0	0	0	0	0	0	0	0	0
Solyc10g038183.1	0	0	0	0	0	0	0	0	0	0	0	0	0	0	0	0	0	0
Solyc11g006900.1	1.1316	1.1842	1.7534	3.9625	6.3787	9.1341	0.5529	1.2625	0.9176	0.7306	0.7032	0.7512	2.2914	1.7134	3.1662	1.1404	0.8052	1.437
Solanum_lycopersicum_newGene_1759	0	0	0	0	0	0	0	0	0	0	0	0	0	0	0	0	0	0
Solanum_lycopersicum_newGene_1752	0	0	0	0	0	0	0	0	0	0.161	0.1956	0	0.3506	0	0	0	0	0
Solanum_lycopersicum_newGene_1750	1.6178	1.9313	1.8307	0.4514	0.7591	1.1854	0.8259	0.7271	0.7624	1.1083	0.9431	0.9695	0.5914	0.6461	0.7354	1.1497	1.0864	1.2727
Solanum_lycopersicum_newGene_1756	0	0	0	0.0773	0.015	0.0765	0	0	0	0	0.0466	0	0.0912	0	0	0.0215	0.1441	0
Solanum_lycopersicum_newGene_1757	0	0	0.1597	0	0	0	0.0917	0	0.0753	0.3118	0	0	0.2867	0.3686	0.1225	0.2201	0	0
Solanum_lycopersicum_newGene_1754	0	0	0	0	0	0	0	0	0	0	0.3152	0.2018	0	0	0	0	0	0
Solanum_lycopersicum_newGene_1755	0	0	0	0.107	0	0	0	0	0	0	0	0	0	0	0	0.0413	0.0613	0.0579
Solyc11g021160.1	0	0	0	0	0	0	0	0	0	0	0	0	0	0	0	0	0	0
Solyc01g080120.2	0.0127	0.0524	0.0468	0.0428	0.0581	0.0816	0.0693	0.0151	0	0	0	0	0.1794	0.0525	0.1768	0	0	0.0647
Solyc09g008650.3	49.2792	50.1425	49.8318	57.5698	53.1302	53.3909	64.6996	58.9549	63.2463	87.8578	70.9284	87.8429	116.884	115.735	130.212	90.9897	92.7239	108.924
Solyc02g021480.4	7.068	8.2022	8.5844	11.2341	11.0365	12.3065	7.5466	8.0681	7.4184	6.2417	5.4891	5.4342	8.8039	8.249	6.9387	5.483	6.3046	6.1147
Solyc06g035960.3	5.6397	8.1023	15.408	1.7537	3.2664	13.6301	2.1622	4.0265	3.8991	8.4581	7.6872	3.4813	0.7984	1.0649	1.6741	1.907	1.1527	0.8709
Solyc03g120730.3	10.254	16.4058	14.0693	11.5175	12.6121	11.8169	8.3308	9.3203	7.1343	5.7151	6.1187	5.2224	6.6247	6.2078	6.5816	3.9464	3.6539	4.1778
Solyc02g080200.4	0.2396	0.2059	0.0689	3.2779	1.9813	1.0303	1.4854	1.5297	1.5706	4.5069	3.1208	0.7624	27.0261	21.9548	10.8701	14.7248	10.9694	13.7987
Solyc04g079790.3	97.0428	94.8091	96.3472	127.804	103.251	106.228	121.929	103.196	94.7463	197.883	180.649	235.598	176.604	142.35	186.074	163.298	120.066	156.416
Solyc05g005930.3	4.7294	4.6529	5.7622	17.7303	17.2117	17.9428	8.2011	7.7453	11.8536	5.2673	4.7303	3.8861	26.7644	25.2597	26.7707	18.7237	17.5267	14.433
Solyc01g096680.4	0.1954	0	0.1272	0.4038	0.0806	0.2031	0.4827	0.2734	0.0986	0.7805	0.6714	0.9089	1.1761	1.054	1.339	0.535	0.5071	0.6777
Solyc03g083530.3	128.226	175.136	157.31	181.65	210.373	196.121	130.444	132.605	129.193	115.461	133.369	159.772	108.412	123.851	123.273	104.822	106.778	112.476
Solyc06g069380.4	6.1805	9.8014	9.4653	13.7365	8.266	6.7221	8.3197	7.7547	7.0409	8.9103	11.159	8.1489	5.6688	7.9117	7.0663	6.558	8.7669	9.555
Solyc05g049970.3	24.787	25.5501	20.9182	16.5496	15.7197	14.9111	29.6342	31.7238	29.742	17.3802	18.3273	18.3032	12.2962	11.9848	15.3261	15.708	17.7184	17.7189
Solyc07g047640.2	1.4627	0.7422	1.0369	3.7799	3.3617	2.2624	1.6803	1.3758	1.6449	1.5574	1.0915	1.3751	2.2362	1.168	1.1387	0.7943	0.879	0.3521
Solyc10g079100.1	6.6029	6.8964	8.7948	3.6848	3.5853	4.8944	5.7414	3.4266	2.5786	14.8179	11.4983	9.5062	3.7702	4.1233	4.5721	1.928	2.5114	2.6846
Solyc03g070390.3	0.0214	0	0	0	0.0221	0	0	0	0	0.0679	0	0	0	0.0966	0	0	0	0
Solyc08g014612.1	0	0	0	0	0	0	0	0	0	0	0	0	0	0	0	0	0	0
Solyc09g092030.4	5.9835	6.429	6.6324	8.9101	10.4566	8.9758	7.8401	7.505	8.4619	6.5513	6.8752	5.3945	7.1983	7.0348	6.832	6.7538	5.017	5.5644
Solyc02g004005.1	1.5284	1.2595	1.4144	1.611	1.109	1.3586	0.1679	1.0427	0.2171	1.4699	1.269	1.6951	0.3841	0.4101	0.2826	0.7403	0.5492	0.4828
Solyc12g099140.2	0.0756	0.4396	0.1483	0.0874	0.4017	0.3771	0.0848	0	0	0	0.1111	0.0844	0.75	0.3289	0.402	0.1054	0.1382	0
Solyc06g084440.3	13.1211	14.3126	15.0132	15.6349	17.5712	18.7049	12.3287	13.603	15.5616	14.1143	13.3176	13.2595	20.6435	21.5163	23.6586	17.6718	18.3167	14.4843
Solyc03g117340.1	5.3385	7.3427	11.1258	8.1855	4.7818	5.5579	9.1119	7.6069	6.8059	7.5207	6.2433	6.9362	2.9814	3.2213	2.9327	2.7633	5.1448	2.6616
Solyc05g052340.4	0.7214	0.124	0.1591	0.017	0.0581	0.0503	0.2664	0.1367	0.1041	0.3706	0.1094	0.3094	0.2257	0.0639	0.1226	0.2128	0.1422	0.0806
Solyc02g072260.4	35.7992	34.3116	41.0694	8.1963	5.3442	4.5717	55.5342	65.39	60.0909	54.2427	51.0403	45.875	6.0371	10.3717	10.0272	32.728	31.1338	33.3291
Solyc08g006000.3	17.2138	19.5816	24.439	64.0361	70.4152	75.1795	25.6412	27.3619	26.1654	16.3471	16.2282	16.7856	57.4449	49.4661	50.089	23.7792	17.9582	20.1575
Solyc06g053195.1	0	0	0	0	0	0	0	0	0	0	0	0	0	0	0	0	0	0
Solyc04g064840.1	0	0	0	0	0	0	0	0	0	0	0	0	0	0	0	0	0	0
Solanum_lycopersicum_newGene_1280	0	0.5413	0.1699	0	0	0	0	0.0404	0	0.6142	0.4469	0.4379	0	0	0	0.5302	0	0.0718
Solanum_lycopersicum_newGene_1283	0	0.2034	0.0563	0	0	0	0.1094	0.1606	0	0	0.0219	0	0.067	0.096	0.1231	0.3564	0.0779	0
Solyc01g006710.4	3.2775	3.814	4.4494	6.5411	9.0719	9.4729	3.309	4.5067	3.871	4.0349	3.8828	3.8256	7.2983	6.8958	7.0905	4.1368	3.707	3.4612
Solanum_lycopersicum_newGene_1286	0.2957	0.1248	0.3125	0.4019	0.1128	0.0292	0.0604	0.1479	0	0.0573	0.0635	0.1241	0	0.1894	0.1	0.061	0	0
Solanum_lycopersicum_newGene_1287	0	0.1515	0.2145	0.1425	0.2575	0	0.2047	0.2079	0.0627	0.1926	0.1552	0.0713	0.2399	0.2165	0.2958	0.1361	0	0.2837
Solanum_lycopersicum_newGene_1288	0	0	0	0	0	0	0.0938	0.1752	0.1065	0	0.094	0	0.1533	0	0.1544	0.2031	0	0
Solyc07g005920.3	0	0	0	0	0	0	0	0	0	0	0	0	0	0	0	0	0	0
Solyc02g087520.3	3.1801	0	1.8284	0.2891	0.302	0.1843	0	2.7105	0	4.5187	4.2102	2.5124	5.2307	2.3214	3.8261	4.3224	3.243	3.3348
Solyc01g005820.4	47.3223	56.5047	54.7177	60.0264	71.1368	65.8733	64.2263	52.5244	53.6617	50.0134	54.1965	60.0704	63.5489	56.4664	58.3569	53.8201	60.9259	56.4788
Solyc12g020120.2	0.4099	0	0.4888	1.0578	0.838	0.6886	0.4476	0.5898	0.8551	0.4597	0.3327	0.3588	1.0239	0.9839	0.7124	0.3671	0.2309	0.3094
Solyc03g007000.4	7.1013	6.9334	5.4387	9.5194	8.1796	8.3548	10.1729	8.4069	9.8558	5.7042	6.5277	5.1453	11.5914	10.7353	9.5105	9.2495	7.4536	8.5874
Solyc06g069820.4	4.2652	3.5059	2.8958	1.4262	1.7777	1.2119	4.2016	2.2536	2.7189	6.1031	6.2111	7.4697	5.6219	8.1502	7.3807	6.33	5.9114	7.4641
Solyc04g005780.1	0.106	0.063	0.1123	0.4266	0.2318	0.3055	0.0367	0.0727	0.2251	0.0264	0.0914	0.0827	0.4496	0.4456	0.2159	0.0433	0	0.0778
Solyc11g071530.1	2.2002	2.7093	2.963	6.5541	5.8647	5.3755	4.5092	3.4821	4.633	1.802	2.0786	2.4928	2.6727	2.6268	3.2459	2.1724	2.1263	1.9351
Solyc06g082830.3	78.2304	93.6842	76.4629	95.65	139.638	110.717	62.2761	88.15	71.3105	29.8685	33.4707	29.7957	67.9127	63.2698	58.7731	31.6632	33.6661	34.6621
Solyc02g070030.4	4.187	4.5469	4.3294	6.8444	8.2314	7.7167	5.3138	4.9795	4.8698	4.6401	4.5172	4.078	7.1295	6.6082	6.5079	5.5236	5.0056	5.5218
Solyc03g007010.4	5.2353	5.4593	5.5322	6.282	6.0614	6.6217	5.6805	5.4158	4.5144	5.6342	4.6709	4.6951	3.4803	3.2341	2.9669	3.064	3.8955	3.5692
Solyc05g009910.3	24.5404	27.5698	25.1935	27.1849	39.7824	35.5614	22.3773	28.4474	26.6474	23.304	19.9713	23.7941	37.0475	33.1154	33.4899	24.9873	23.5827	24.4411
Solyc05g015536.1	0	0	0	0	0	0	0	0	0	0	0	0	0	0	0	0	0	0
Solyc06g009190.4	0.4647	0	0.0257	155.502	98.1234	104.57	3.1891	1.7546	1.0226	1.1029	1.6527	2.8831	175.924	185.926	185.889	9.7367	13.4682	10.6334
Solyc06g150116.1	0	0	0	0	0	0	0	0	0	0	0	0	0	0	0	0	0	0
Solyc07g025120.1	0	0	0	0	0	0	0	0.0593	0	0	0	0	0	0	0	0	0.0806	0
Solyc12g014590.3	3.0051	1.7726	0.601	0.2433	0.4119	0.235	0.9523	0.9581	0.7862	2.0112	3.5048	2.6197	0.3397	0.5238	0.8765	0.9834	1.4318	2.1584
Solyc02g011740.1	0	0	0	0	0	0	0	0	0	0	0	0	0	0	0	0	0	0
Solyc07g005775.1	20.1905	17.615	13.4802	18.914	23.8855	18.4028	10.432	14.5808	15.2861	16.7699	19.0102	14.1269	18.3587	14.3881	15.739	9.6867	8.8141	13.0673
Solyc04g079550.4	69.8483	84.4889	81.3938	65.6753	77.5218	79.7937	42.4652	52.9186	53.6407	61.9046	75.3467	64.1994	73.7189	71.5271	68.4169	47.4431	55.1663	47.7006
Solyc04g058080.3	0.5325	0.2445	0.1485	1.2148	0.5048	0.5407	0.8423	0.2669	0.8025	1.6577	1.9086	1.772	1.4539	2.0744	3.7213	1.0133	1.5954	1.5132
Solyc08g048560.2	0	0	0	0	0	0	0	0	0	0	0	0	0	0	0	0	0	0
Solyc08g005790.3	0.0682	0	0	0	0.0569	0	0.1379	0	0	0	0	0	0	0	0	0	0	0
Solyc05g012100.3	5.8014	6.1112	6.0551	20.5543	19.3005	18.703	6.778	4.7817	6.7387	9.3069	8.9716	12.8913	19.1992	18.3143	17.7941	8.6726	8.7626	6.8825
Solyc07g048020.3	0	0	0	0	0	0	0	0	0	0	0	0	0	0	0	0	0	0
Solyc12g017263.1	1.4197	1.0378	0.9406	2.5205	2.6234	3.1462	1.3675	2.2153	1.4961	2.396	2.0393	0.6379	1.8631	2.3646	2.4025	1.7093	1.4429	1.9952
Solyc07g063360.1	0	0	0	0	0	0	0	0	0	0	0	0	0	0	0	0	0	0
Solyc01g016850.2	0	0	0	0	0	0	0	0	0	0	0	0	0	0	0	0	0	0
Solyc06g068440.4	28.6441	15.4515	18.2947	16.2024	10.9556	12.3218	28.7311	22.2208	22.8417	36.5145	43.1414	48.3106	33.363	39.8611	35.7231	48.7629	56.5343	59.5054
Solyc02g083190.2	1.7351	1.3967	1.0116	1.6651	2.0878	2.4002	3.0981	1.7467	2.515	0.5119	0.4935	0.5409	1.4534	0.5714	0.7988	1.0317	0.7538	1.0363
Solyc07g041760.3	1.5509	2.0662	1.7783	1.3586	2.2757	3.1024	1.3073	1.0083	1.1557	4.425	3.1	3.3768	1.0391	0.9676	0.8524	2.0429	1.2007	1.1896
Solyc02g032940.4	0.881	0.3709	0.9419	2.0957	1.2226	1.1168	2.5689	3.3442	2.4999	3.1824	4.5779	3.7561	3.0457	4.1799	3.036	1.8424	2.5973	4.0246
Solyc01g102580.3	44.4867	54.1279	42.4442	62.872	50.6552	52.2562	76.5923	54.669	56.4589	33.4237	58.6412	58.3626	61.8585	66.6831	64.7515	73.2339	90.5981	96.3035
Solyc04g051200.2	19.8986	23.2731	24.1488	26.3043	28.8863	33.2534	20.7891	20.1822	22.4001	21.3274	21.4976	18.7147	20.9382	24.0382	24.4745	17.7272	14.8651	18.0184
Solyc08g016740.1	0	0	0	0	0	0	0	0	0	0	0	0	0	0	0	0	0	0
Solyc09g065885.1	0	0	0	0	0	0	0	0	0	0	0	0	0	0	0	0	0	0
Solyc08g021790.1	0	0	0	0	0	0	0	0	0	0	0	0	0	0	0	0	0	0
Solyc07g006060.3	2.1236	2.4361	2.4652	2.879	2.7735	2.6795	2.726	2.9829	2.4529	2.4732	3.7706	4.0094	2.3908	2.3844	2.3634	2.3887	2.5442	3.2512
Solyc01g079380.1	0	0	0	0	0.0172	0	0	0	0.0839	0	0	0.0446	0	0	0	0	0	0
Solyc02g086660.4	9.0427	7.8761	9.6438	10.3864	12.5683	13.3181	4.6295	7.8683	6.2168	9.5848	8.2298	8.0199	11.451	10.0988	9.3959	7.5019	7.8932	5.9557
Solyc10g061840.3	0	0	0	0	0	0	0	0	0	0	0	0	0	0	0	0	0	0
Solyc10g054455.1	0.0175	0.0451	0.0487	0.0144	0	0.0581	0.0524	0.0538	0.0301	0	0.0477	0	0	0	0	0	0	0
Solyc08g062070.1	0	0	0	0	0	0	0	0	0	0	0	0	0	0	0	0	0	0
Solyc09g074670.4	13.2157	14.3818	12.4984	13.0801	14.6663	14.7015	12.0157	10.9041	12.8227	8.6696	10.2383	8.3446	10.5324	10.3625	9.6617	8.7394	9.437	7.7812
Solyc08g007430.2	0.837	0.6774	1.1905	0.4835	0.2313	0.4338	1.8724	1.5637	1.8578	0.8705	1.3293	0.7082	0.2561	0.4447	0.6264	1.1714	0.6538	0.6218
Solyc05g042070.4	2.3807	2.7879	1.8348	3.1398	3.8226	2.8169	1.6877	2.9889	3.6584	1.6933	1.3868	1.9354	1.7764	1.3417	2.2029	1.2543	1.1006	1.8941
Solyc04g007870.3	7.1598	8.3032	8.8334	7.8013	8.4089	8.4218	4.6606	4.3997	4.906	5.6544	5.5914	5.9544	5.5837	5.3796	5.6959	4.0456	3.8627	4.2851
Solyc01g010050.3	44.0308	44.3299	42.6576	85.2205	104.046	91.0439	46.1421	66.0426	47.7905	22.2869	27.9176	21.592	32.2086	29.0417	22.5593	24.0336	24.7978	20.9553
Solyc04g049390.3	76.1424	84.094	86.0456	38.6792	33.6634	34.4398	89.7548	80.4129	85.0036	85.4577	76.131	80.7235	34.6277	31.6557	35.4842	68.7834	63.1909	64.7996
Solyc03g093120.5.1	3.3226	0.6908	0.478	0.3337	0.3442	0.6657	0.193	0.5092	0.6971	0.5228	1.397	1.6453	0.0787	0.0498	0.1854	0.1499	0.1319	0.2086
Solyc07g049655.1	16.4286	20.9329	26.4559	8.2503	6.4544	20.2101	9.027	7.8537	8.3874	21.7743	25.0481	34.3295	7.6731	11.2827	12.1845	10.5314	9.5779	12.8384
Solyc01g104780.3	1.2358	2.2339	2.3978	0.6289	0.4273	0.2588	0.143	0.297	0.0397	2.1854	1.7305	2.0843	2.6361	1.4494	1.2581	1.3066	0.9287	0.5614
Solyc07g040661.1	1.1225	1.0296	0.9706	2.5748	1.738	2.5727	1.3568	1.9232	1.79	1.0786	1.5763	1.2137	2.0782	2.0042	2.3277	1.9552	1.4117	0.8952
Solyc11g042720.1	0	0	0	0	0	0	0	0	0	0	0	0	0	0	0	0	0	0
Solyc05g013530.4	94.363	92.0447	82.581	70.1905	84.209	72.3636	89.5952	108.671	131.705	39.8865	35.8105	35.8898	37.0203	26.6726	26.0426	40.353	31.1157	33.1654
Solyc06g007260.1	2.2097	2.9726	3.3502	5.4859	4.1036	5.9432	4.7122	2.2899	3.2472	1.719	1.5493	1.4057	4.304	5.4444	3.4013	3.3226	1.9156	2.6575
Solyc01g088500.3	0.1228	0	0	0.2525	0.1502	0.2572	0.4135	0.3185	0.1489	0.1583	0.24	0.2781	0.6487	1.6445	1.2758	0.5783	0.8461	0.8775
Solyc04g063440.3	0	0	0	0	0	0	0	0	0	0	0	0	0	0	0	0	0	0
Solyc07g005200.3	33.0038	35.463	42.7212	38.2539	42.3841	47.7439	35.5812	39.2934	37.172	35.5284	34.6161	33.4789	42.778	37.0577	44.6966	40.1397	30.2687	31.6128
Solyc11g044520.1	1.5236	3.0681	3.5595	0.5306	0.4523	0.6344	1.7152	0.8222	1.4093	1.2575	1.4298	0.6065	0.8086	0	1.1911	0.9464	0.8395	1.2759
Solyc02g092783.1	0.0279	0.0239	1.8179	0.2035	0.1353	0.0858	0.2355	2.7244	0.3682	4.0994	0.0591	1.8809	0.2374	0.1636	2.0317	3.7692	0.3423	0.2962
Solyc01g067140.2	0	0	0	0	0	0	0	0	0	0	0	0	0	0	0	0	0	0
Solyc02g086140.2	2.5207	0.079	2.0803	0.7793	0.2202	0.5366	0.4059	3.2109	0.2431	4.4654	3.6985	1.9936	5.0554	2.3864	3.4304	3.8763	2.2505	3.0507
Solyc09g150157.1	0.1425	0.0817	0.2418	0.4011	0.559	0.8118	0.2489	0.4551	0.4803	0.6877	0.2122	0.1749	0.6154	0.9646	1.0394	0.2635	0.1936	0.3539
Solyc02g094570.3	4.0335	3.8278	4.6945	4.7748	3.597	4.1146	5.3026	6.2985	5.4811	3.1305	2.8213	2.8958	2.51	2.2763	1.8988	4.6741	4.6075	3.9097
Solyc04g082380.4	0.6325	1.1052	0.8609	1.9962	1.8053	2.4392	1.1682	1.6832	1.3555	1.3297	0.6119	1.5291	2.6011	2.4245	1.8413	1.2899	0.9243	0.8014
Solyc09g055670.1	0	0	0	0	0	0	0	0	0	0	0	0	0	0	0	0	0	0
Solyc09g074180.3	0.7626	0.5301	0.9432	1.0207	1.3253	0.9947	1.644	0.6734	0.5066	0.9539	0.2551	0.591	1.1786	1.4439	0.7104	0.4716	0.4748	1.3717
Solyc10g080130.3	0	0	0	0.1608	0.097	0.1796	0	0.0768	0.0926	0.1314	0.1204	0	0.3757	0.4332	0.1091	0.1245	0	0.2581
Solanum_lycopersicum_newGene_247	0	0	0	0.1102	0.1877	0.036	0.1607	0.1768	0.0905	0	0	0	0	0	0	0	0	0
Solyc11g033284.1	30.0193	30.359	32.1619	35.204	34.2024	32.1122	40.6219	39.6045	42.5847	45.7348	39.7502	45.7431	42.6351	37.7057	43.6936	42.3208	39.8166	42.134
Solyc04g049680.2	18.9066	26.9622	23.581	76.0979	73.9704	79.7784	25.8516	22.1046	22.6278	14.0966	16.3716	15.5034	82.3972	81.0538	79.7504	22.1262	24.7774	23.212
Solanum_lycopersicum_newGene_245	0.07	0.0888	0.3171	0.1357	0.222	0.42	0.0333	0.0183	0.1262	0	0	0	0	0	0	0	0	0
Solyc11g010980.2	0	0	0	0.0787	0	0.1245	0.0862	0.0989	0.0925	0	0	0	0	0	0.0325	0.0229	0	0
Solyc06g150126.1	0.0172	0	0	0	0	0	0	0	0.0064	0	0	0.01	0	0	0	0	0	0
Solyc11g056540.1	0	0	0	0	0	0	0	0	0	0	0	0	0	0	0	0	0	0
Solyc01g104260.3	0.0325	0.2043	0.087	0.2393	0.1981	0.2685	0.4647	0.4309	0.0658	0.494	1.0229	0.7375	0.8188	1.2945	0.6683	0.6225	0.7736	0.8852
Solyc01g094260.4	0	0.145	0.1238	0.1313	0.1801	0.1449	0	0.1373	0.2342	0.048	0	0	0.1461	0.6442	0.163	0.1792	0.271	0.2008
Solyc06g076440.3	4.6197	5.8973	7.3065	7.3345	8.4942	8.3898	3.6044	4.4852	4.4365	5.935	6.1058	5.84	3.4447	3.3212	2.918	2.5609	2.3834	1.7921
Solyc11g013270.2	3.4694	2.2148	1.9701	5.0883	2.6178	1.8387	6.5586	3.2637	4.4739	2.0792	3.6347	3.4605	3.6895	5.0668	4.8299	4.564	7.5487	6.7066
Solyc05g013860.4	0.3863	0.4059	0.3089	0.8834	0.199	0.499	0.9103	0.8509	0.8419	0.7657	1.0965	1.3148	0.6939	1.0341	1.3342	0.9544	1.0711	1.3419
Solyc01g104270.4	56.9245	62.1207	66.9468	65.579	76.4107	73.3012	46.3402	54.4287	50.4735	68.6009	59.7531	65.6862	60.7071	48.2567	50.1247	50.0604	46.4635	44.1159
Solyc10g085700.1	0	0	0	0	0	0	0	0	0	0.3172	0	1.0146	0	0	0.0352	0	0	0
Solyc03g031480.3	0	0	0	0	0	0	0	0	0	0	0	0	0	0	0	0	0	0
Solyc01g111840.3	3.8503	1.951	3.2528	12.0293	8.0239	8.1437	4.5428	3.7377	3.2434	2.2499	4.6841	4.5507	8.7561	13.9084	11.913	4.4336	4.4334	5.1884
Solyc10g086480.3	2.8172	2.477	2.1552	8.964	7.624	7.0903	6.871	6.2209	6.7025	2.0808	3.7959	3.1843	10.9673	12.7378	13.8325	10.0042	10.7298	12.7475
Solyc06g150118.1	2.4199	3.704	0	1.6634	2.1815	0	1.1901	1.9682	1.4356	2.0142	1.7535	2.3002	1.2474	0.9798	1.0279	1.2141	0	0
Solyc03g044630.2	1.8923	1.5991	1.5382	15.306	13.3392	11.2312	2.5098	3.2017	4.5359	2.3252	2.6056	1.8134	21.9021	19.3765	28.7178	1.5326	1.7639	1.1216
Solyc00g021640.2	0.1899	0.2302	0.3129	0.2952	0.3484	0.3022	0.2267	0.4074	0.2534	0.197	0.1122	0	0	1.3677	0.134	0.0793	0.062	0.4269
Solyc03g113220.3	42.8967	52.5592	55.3408	48.4228	71.3782	70.0899	33.3188	39.8751	43.3018	46.3826	34.7036	42.2617	33.3053	29.3427	25.6997	27.2481	22.4698	24.7714
Solyc12g017610.1	0.0401	0.0402	0.106	0.0579	0.1282	0.1334	0.141	0.0342	0.1022	0	0.0468	0.0446	0.05	0.1082	0.1229	0.0313	0.04	0.0229
Solyc05g050130.4	10.8866	12.378	23.1107	39.772	22.8624	90.303	10.4166	5.1278	8.732	43.6132	27.587	89.382	16.0088	29.9072	26.9157	24.8707	17.8391	26.5128
Solyc09g090140.4	205.783	255.037	269.747	179.355	197.498	208.685	174.189	193.07	201.235	389.901	418.024	403.226	211.803	199.864	254.045	252.128	236.043	234.34
Solyc04g050100.1	0	0	0	0	0	0	0	0	0	0	0	0	0	0	0	0	0	0
Solyc01g095350.2	0	0.1743	0	0	0	0	0	0	0	0.0959	0.0578	0	0	0	0	0	0	0
Solyc04g058000.2	0	0	0.0966	0	0	0	0	0	0	0	0.0826	0.199	0	0	0	0.0497	0	0
Solyc05g009710.4	9.793	8.0045	10.0636	10.6029	14.5049	13.1586	7.6838	9.0246	7.7678	7.5894	5.712	6.2902	5.5581	5.4401	6.4043	5.6151	5.942	5.7615
Solyc02g037555.1	0.5884	1.6195	2.2625	1.0041	1.1475	0.9169	6.049	8.0263	10.1194	1.7792	2.6248	4.0907	6.0946	6.358	8.634	7.5145	10.5088	10.5793
Solyc02g079010.4	6.9148	4.5425	3.8617	2.2655	3.3488	3.8989	1.4048	1.9675	1.5007	3.5991	6.5087	4.1443	1.3241	1.4344	1.9328	0.9809	0.9523	1.1624
Solyc03g058370.2	0	0	0	0	0	0	0	0	0	0.5078	0.943	1.2373	0.9799	1.6496	1.8063	0.6728	0.8708	1.9899
Solyc02g005007.1	0	0	0	0	0.1815	0	0.2091	0	0	0.199	0	0	0	0	0	0.288	0	0
Solyc12g010910.2	58.8463	67.3411	77.9492	54.7515	51.7442	45.1652	57.8626	51.1729	50.7008	65.8238	65.5768	63.6984	41.7333	36.16	37.9084	37.6449	31.5193	29.1511
Solyc12g099310.2	63.6006	83.6146	96.9421	54.9729	71.7734	65.737	53.5817	80.0477	73.596	82.6934	87.1938	76.5547	42.3897	41.3672	38.575	35.5427	45.11	37.5337
Solyc10g084500.1	0	0	0	0	0	0	0	0	0	0	0	0	0	0	0	0	0	0
Solyc05g150116.1	9.5049	7.1917	5.1126	4.4253	5.3104	4.7458	1.6042	2.5316	1.3147	4.9252	2.7582	2.4411	2.9005	1.0148	0.668	1.9399	1.232	1.4712
Solyc01g099870.3	0.1056	0	0.1475	0.8047	0.136	0	1.5058	0.5534	1.772	0.3448	0.2256	0.8898	1.9535	4.3181	3.2286	3.8131	6.0258	9.3482
Solyc12g056050.1	0	0	0	0	0	0	0	0	0	0	0	0	0	0	0	0	0	0
Solyc01g105200.2	0.6549	0.8352	1.6274	0.8575	1.3334	1.3392	0.5829	0.7501	0.572	2.268	1.1792	1.6111	0.5994	0.3707	0.5821	0.8871	0.4954	0.2613
Solyc12g096340.2	7.7301	9.2364	9.2085	22.2666	23.8277	23.5338	9.5769	9.913	10.2234	6.5107	7.4375	7.2838	17.7131	17.5965	18.3867	9.8469	9.4604	9.5552
Solyc01g103400.4	14.9005	16.8899	15.2238	32.1881	34.5821	32.6283	23.5612	24.4844	21.1507	14.1213	15.9438	14.2985	23.4039	23.6649	29.6454	17.1808	16.8437	20.1687
Solyc03g026060.3	5.6851	7.0892	8.3428	8.7338	10.5462	9.8448	6.4309	6.9286	7.0735	6.2242	5.7477	4.8187	8.7325	8.4968	7.8271	5.0225	5.5975	4.4509
Solyc06g009650.3	9.6444	12.0289	10.2522	18.0042	18.333	18.0891	12.1855	11.928	12.401	8.8274	9.7202	9.4582	14.0233	14.2073	13.8848	10.37	10.4275	9.9057
Solyc01g010420.3	0	0	0.0662	0	0	0	0	0	0	0.1984	0.0123	0.0158	0	0.0137	0.0728	0.0351	0	0.0547
Solyc08g080640.2	10.0079	23.3256	35.4929	12.2531	119.841	151.626	7.7188	19.2733	25.9979	15.2773	3.5976	2.3412	10.1222	14.0457	30.6342	9.475	5.4071	0.3395
Solyc11g012720.2	1.4131	2.0844	1.7734	2.9677	3.2121	3.0814	3.525	3.0427	2.7784	1.3922	1.1667	1.5994	2.4684	1.8703	3.1789	1.8952	1.8512	1.57
Solyc02g083980.3	13.2666	11.3995	11.9196	16.6479	15.4889	14.7817	14.4518	11.5383	13.6039	23.9598	22.0711	24.8498	21.7083	20.5565	23.7365	23.5793	23.6415	26.5515
Solyc06g075340.4	17.1703	20.0508	20.9844	46.6847	47.1377	49.3263	16.7004	16.1198	17.2564	21.9041	19.5844	27.7347	41.1064	40.8939	41.6626	20.9276	17.6872	18.1277
Solyc02g043820.1	0	0	0	0	0	0	0	0	0	0	0	0	0	0	0	0	0	0
Solyc11g072480.2	0.8401	2.8727	3.1329	57.5375	52.395	56.2639	3.2327	2.8822	3.2174	3.6103	4.2592	5.7288	51.2212	47.7602	48.7978	6.4867	6.1802	6.65
Solyc12g036410.3	5.2456	5.0023	4.2373	7.9948	9.9235	9.6948	5.8807	5.5182	5.0831	6.9733	5.2155	5.4774	7.0963	8.118	7.7696	5.1405	5.4919	5.6571
Solyc07g006580.3	11.1287	8.7043	12.1383	24.8252	20.7038	24.2045	14.5346	14.4883	16.4676	11.7571	16.097	12.8091	28.0085	26.0274	25.6631	16.5151	16.9003	16.9096
Solyc00g500094.1	0	0	0	0	0	0	0	0	0	0	0	0	0	0	0	0	0	0
Solyc11g012730.3	10.6265	8.6668	8.1489	17.4743	14.7368	14.1182	15.7976	12.6285	14.8305	9.9671	11.6556	10.8297	20.3707	19.8705	26.2245	13.9712	16.9815	16.0949
Solanum_lycopersicum_newGene_2142	0.0523	0.0401	0.274	0.0974	0.1749	0.5932	0	0	0	0	0	0.0541	0.0573	0.2475	0	0.0306	0	0.0369
Solanum_lycopersicum_newGene_2143	1.5523	1.7568	1.6154	2.6612	2.5824	3.0942	2.0205	1.6574	1.5821	2.0194	1.8132	2.2224	2.2716	1.8949	1.823	2.2209	1.4697	2.2647
Solanum_lycopersicum_newGene_2141	0.3954	0.1322	0.1241	0.2628	0.6214	0.393	0.3592	0.6468	0.2704	0.209	0.2982	0.3595	0.1331	1.0277	0.3906	0.1519	0.6791	0.0578
Solyc10g085090.3	0.6775	0.098	0.1886	0.3065	0.0346	0.1591	0.1834	0	0.089	0.6813	0.8968	0.8865	0.5738	0.9607	1.2929	0.4722	0.5066	0.2187
Solyc01g007080.3	0.2092	0.2854	0.6916	0.0176	0	0	0.2029	0.1681	0.2518	0.2268	1.1389	1.5325	0	0	0.2731	0.183	0.0811	0.3496
Solyc02g084280.3	2.2022	2.9891	2.2084	1.4996	1.2654	1.473	1.0523	0.9232	2.2179	1.3662	0.4392	0.9171	0.6261	0.3566	0.5764	0.9618	0.2267	0.324
Solyc09g064360.1	0	0	0	0	0	0	0	0	0	0	0	0	0	0	0	0	0	0
Solyc11g011340.2	5.3375	7.2698	21.9436	1.7313	5.0162	11.4157	8.0865	11.9209	12.9795	91.7626	93.709	72.6021	8.9121	9	13.0586	48.456	47.6483	34.619
Solyc01g101150.3	1.4474	1.399	1.1652	1.7505	2.3331	2.6376	1.1598	1.0276	1.335	0.9479	0.6967	0.9046	1.7193	1.1233	1.5443	1.4159	1.1947	0.7179
Solyc01g021700.3	0	0	0	0	0	0	0	0	0	0	0	0	0	0	0	0	0	0
Solyc01g090760.4	3.8711	1.121	1.0226	15.9059	9.2009	10.8084	3.5421	3.0013	2.0172	1.3432	1.4298	1.6477	9.2509	7.5718	4.8751	2.6221	4.1316	2.283
Solyc02g043980.1	0	0	0	0	0	0	0	0	0	0	0	0	0	0	0	0	0	0
Solyc06g071350.4	18.0512	18.8593	17.8262	19.4689	21.8078	20.6111	16.3327	14.2606	17.4547	12.7371	13.9401	11.953	14.7205	15.8438	12.6702	12.0347	13.001	11.693
Solyc01g086640.2	4.5385	2.8275	1.6365	5.8604	7.3045	7.0028	2.4291	1.3326	1.2792	0.6488	1.4983	1.6043	4.1566	7.1634	5.3147	1.3284	3.013	2.2961
Solyc01g087200.3	4.5984	4.5823	4.8717	5.6431	6.9318	5.0616	3.5424	4.4441	4.6324	2.5809	2.4612	2.771	2.8483	3.0791	2.2028	1.8323	2.02	1.8633
Solyc07g052490.4	0.9448	0.3625	0.5683	0	0	0	1.0317	0.4662	1.9443	2.6941	1.2339	2.0042	0.259	0	0.3821	4.3579	2.4202	3.9482
Solyc03g112650.3	7.3799	9.0998	9.8219	28.6368	27.2662	25.6078	12.5385	12.2131	13.5846	9.4768	7.6184	11.0306	22.229	18.0115	18.9283	13.0178	11.6085	13.0822
Solyc03g094100.1	0.0205	0.0513	0.0837	0.0612	0	0.0204	0.0965	0.1876	0.2989	0.108	0.3167	0.4469	0	0.0929	0.0682	0.2826	0.0597	0.6126
Solyc01g014980.4	0	0	0	0	0	0	0	0	0	0	0	0	0	0	0	0	0	0
Solyc09g076050.4	113.36	127.146	119.985	168.421	139.784	126.909	165.487	155.352	126.438	68.9017	82.7463	72.2982	92.5204	82.516	66.7257	71.5261	72.5324	67.6059
Solyc10g017530.3	24.4804	30.2831	28.0511	34.8003	35.8151	35.916	26.3911	26.332	26.0527	22.9805	23.4044	20.9744	31.1355	30.6563	25.1005	22.3638	23.6271	24.3417
Solyc04g082550.2	0	0	0	0	0.0635	0	0	0	0	0	0	0	0	0	0	0	0	0
Solyc08g007620.2	0	0	0	0	0.0171	0	0	0	0	0	0	0	0	0.0345	0	0	0	0
Solyc08g069060.4	6.1014	12.1568	11.2648	5.8331	13.3883	13.1439	2.833	4.8575	4.5537	7.8187	6.3508	5.7809	5.4315	3.8151	5.3052	3.2807	3.1638	2.1078
Solyc11g013600.2	0	0	0	0	0	0	0	0	0	0	0	0	0	0	0	0	0	0
Solyc04g082540.2	0	0	0	0	0	0	0	0	0	0	0	0	0	0	0	0	0	0
Solyc03g120130.4	3.0062	2.4159	3.0267	6.5653	7.4031	7.9556	3.8697	3.3375	4.2648	3.2488	2.1498	3.4205	6.4112	6.542	5.1169	3.9418	3.6706	3.3551
Solyc11g011500.2	0.5335	1.2982	2.1673	1.01	0.9157	0.7006	1.0743	1.8564	1.8726	0.6193	1.6903	1.0338	0.8382	0.6548	0.6652	1.0821	1.0041	0.878
Solyc02g090660.3	0	0	1.7612	0.0415	0	0.1397	0	2.6844	0	0	0	1.8606	0	0	0	3.6142	0	0
Solyc01g103045.1	0	0	0	0	0	0	0	0	0	0	0	0	0	0	0	0	0	0
Solyc02g070880.1	9.8824	10.3904	12.4095	44.8983	48.4483	54.0779	16.5579	17.8967	22.6385	13.0508	10.4141	11.5826	44.1022	45.6554	41.9029	19.6562	20.1957	15.5002
Solyc01g020500.2	0.5318	0.3766	0	0.5286	0.5103	0.6036	0.5597	0.2747	0	1.057	0.5238	0.8934	0.8954	0.8306	0.942	1.2676	0.9185	0.8801
Solyc07g062330.2	0	0	0	0	0	0	0	0	0	0	0	0	0	0	0	0	0	0
Solyc04g016420.3	0.7062	0.7306	0.4469	0.8694	0.8026	0.9573	0.5523	0.4962	1.4039	0.2744	0.4377	0.481	1.7077	1.1785	1.5302	0.5268	0.4302	0.6991
Solyc01g008990.4	6.1852	5.418	6.3796	8.388	10.6806	9.9312	5.418	6.3711	6.3619	5.0928	5.1615	4.9747	9.0257	8.5258	8.6494	5.7622	6.2535	5.6767
Solyc06g061090.3	30.1287	21.4332	23.2053	33.3678	28.1291	26.8969	25.9848	27.6553	27.1716	32.2389	31.4086	35.574	33.1804	30.7926	34.3931	25.0991	24.3346	31.838
Solyc11g070040.3	1.0669	1.4474	1.0877	1.9149	2.557	2.1008	1.1947	0.6234	0.7413	0.579	0.9092	0.8001	1.0729	1.271	1.703	1.0871	0.9493	0.8922
Solyc01g080520.3	0	0.0584	0.0716	0	0	0.032	0	0	0.0096	0.0826	0	0	0	0	0	0	0	0
Solyc06g074010.3	1.8336	1.807	2.0498	1.5313	1.877	1.6919	1.1476	1.7326	1.5109	1.7958	1.952	2.1663	1.2774	1.0961	1.173	0.9349	0.9807	0.9885
Solyc09g091910.2	0.2377	0.2904	0.4746	0.2647	0.5061	0.4825	0.2621	0	0.2822	0.4101	0.0727	0.2478	0.1456	0.1683	0.1837	0.18	0.2345	0.0829
Solyc01g106190.4	3.4023	4.0408	3.5743	4.3107	5.6541	4.8382	3.2447	3.8541	3.3849	2.459	2.5438	2.4137	3.5269	3.4527	3.3089	4.0262	3.9256	2.8046
Solyc07g150145.1	35.9118	40.6951	36.7804	56.3134	74.1571	68.8446	32.0388	41.6457	35.9955	19.1477	28.9041	16.7913	43.7333	37.5318	28.3577	19.935	21.0543	16.1592
Solyc06g009975.1	0	0	0	0	0	0	0	0	0	0	0	0	0	0	0	0	0	0
Solyc10g007680.4	2.14	1.6369	1.7541	4.262	4.62	5.1109	2.0567	2.3299	2.8168	1.3713	1.3662	1.5278	3.5417	2.8362	2.2838	1.5976	2.508	2.0866
Solyc11g072560.3	0	0	0	0	0	0	0	0	0	0	0	0	0	0	0	0	0	0
Solyc10g032563.1	0	0	0	0	0	0	0	0	0	0	0	0	0	0	0	0	0	0
Solyc05g046190.1	0.1627	0.3748	0.3289	0.3231	0.0251	0	0.1453	0.437	0.1465	0.1291	0	0	0.137	0.0369	0.1557	0	0.6107	0
Solyc04g079120.3	24.9618	40.648	29.2195	16.7672	13.1428	15.3255	14.2054	18.9413	17.6865	18.9625	21.4282	21.6925	11.5667	10.1085	9.5627	12.9429	17.1147	16.492
Solyc00g500014.1	0	0	0	0	0	0	0	0	0	0	0	0	0	0	0	0	0	0
Solyc03g031890.3	16.1856	11.2118	9.0756	65.6978	69.8839	54.4178	7.5707	12.8128	8.7044	3.5381	4.9765	1.6939	4.1312	2.5739	1.3152	0.8111	0.5762	0.3606
Solyc09g075410.4	0	0	0	0	0	0	0	0	0	0	0	0	0	0	0	0	0	0
Solyc01g059830.3	9.2946	9.9911	8.814	21.2683	22.079	21.9259	8.8942	11.7481	11.2319	8.9718	8.3452	11.3263	17.0104	16.876	18.2333	12.5622	10.7034	11.8775
Solyc03g005620.4	0.3145	0.0408	0.0859	0.8566	0.2268	0.4348	0.4003	0.2048	0.2237	0.4715	0.3928	0.6503	1.2981	1.5005	1.6258	0.4167	0.5226	0.8633
Solyc04g050380.3	0	0	0	0	0	0	0	0	0	0	0	0	0	0	0	0	0	0
Solyc02g032090.1	0	0	0	0	0	0	0	0.2068	0	0	0.0618	0	0	0	0	0	0	0
Solyc01g107990.3	4.2773	3.4331	4.1403	8.5615	8.7804	10.7463	9.0559	11.8755	11.3846	5.693	7.0325	6.7898	9.2935	10.2172	12.1478	8.5175	9.3303	8.4881
Solyc09g075400.4	0.1231	0.0244	0.0661	0.2178	0.0818	0.0322	0.1116	0.2638	0.2937	0.137	0.0285	0.0226	1.5642	0.6938	1.6525	1.4346	0.8513	1.2749
Solyc10g012000.1	0.2276	0.2929	0.3121	0.1305	0.0776	0.1537	0.3433	0.0234	0.3305	0	0	0	0	0.0854	0	0.1266	0	0
Solyc01g059820.1	0	0	0	0	0	0	0	0	0	0	0	0	0	0	0	0	0	0
Solyc01g057940.1	0	0	0	0	0.0365	0.0749	0.1679	0	0	0	0	0	0	0	0	0.1027	0	0
Solyc01g006660.3	0.3763	0.2416	0.8563	2.033	2.4125	1.9514	1.3245	0.7916	1.4101	1.1823	0.9631	1.4162	2.2882	3.7086	3.2299	2.8067	5.031	5.411
Solyc02g091520.3	13.9989	9.8634	13.9453	9.7143	15.297	14.2867	9.8329	10.4601	12.368	7.4033	4.8754	3.0482	10.7121	4.9816	4.7777	7.2868	4.2262	4.5765
Solyc10g051255.1	0	0	0	0	0	0	0	0	0	0	0	0	0	0	0	0	0	0
Solyc09g010140.3	10.9435	7.662	8.6866	29.8285	27.4831	28.6799	15.4276	19.2837	15.2816	6.2509	8.7483	6.7965	21.0863	21.3268	19.2803	13.8075	13.0229	13.686
Solyc01g110190.4	6.5132	7.0794	7.4307	4.3085	3.872	3.7932	6.6178	4.7531	6.4392	5.5804	9.4775	6.4219	4.9146	5.4168	4.6004	4.9501	6.6776	6.0615
Solyc02g089490.4	3.939	4.3723	4.9794	1.1797	1.5915	1.6996	0.9249	3.3763	1.0352	4.7835	3.5358	2.0139	4.9356	1.5381	1.9183	4.0841	2.3842	1.9402
Solyc06g062540.3	0.352	0.0956	0.32	0	0.026	0.233	0.5989	0.0295	0.248	1.441	0.9313	2.7925	0.3906	0.723	0.6824	0.3005	0.4735	0.9868
Solyc08g067935.1	0	0	0	0	0	0	0	0	0	0	0	0	0	0	0	0	0	0
Solyc05g010670.3	221.625	154.273	147.028	91.8824	108.573	100.187	121.274	99.2385	117.013	225.347	222.431	254.361	141.032	125.994	131.18	189.154	164.847	165.386
Solyc10g052716.1	0	0	0	0	0	0	0	0	0.027	0	0.0219	0	0.0949	0.0634	0.0671	0.0207	0	0
Solyc06g011666.1	0	0	0	0	0	0	0	0	0	0	0	0	0	0	0	0	0	0
Solyc05g025500.3	4.1627	5.9039	3.7282	11.83	10.3095	11.1446	6.2335	5.7954	6.4098	6.214	5.7689	6.4727	11.1011	11.1955	10.2004	7.4628	6.6651	5.9407
Solyc01g109580.4	1.5057	0.989	1.2433	1.6754	0.776	1.0285	2.5877	2.3823	1.9661	2.0021	3.2331	2.8645	3.3144	3.3262	3.7101	2.2672	3.9418	2.7377
Solyc02g070470.1	23.5066	19.4157	16.9131	40.4222	29.6724	34.0074	24.3382	14.8403	16.7037	16.6411	16.8767	15.3032	30.2848	25.9216	24.2207	11.4446	17.5421	16.9773
Solyc12g088610.1	0	0	0	0	0	0	0	0	0	0	0	0	0	0	0	0	0	0
Solyc11g072880.2	51.1218	52.4192	58.8401	44.7159	47.8236	50.2517	43.1115	40.2635	44.731	39.2709	48.1155	41.2121	47.5025	45.5012	44.4031	41.4952	45.2983	42.3424
Solyc11g007590.3	17.3343	17.888	16.15	14.7299	19.5423	21.5141	16.0018	16.3448	21.4272	26.4136	16.0696	25.0284	27.1102	26.2969	27.7589	30.1937	25.3562	24.6909
Solyc03g046200.1	0.199	0.0191	0.0951	0.3756	0.1529	0.3368	0.4854	0.6318	0.4053	0.6573	1.7703	1.5839	1.0353	1.4118	1.1202	0.6988	0.8008	0.574
Solyc07g055870.4	0.5377	0.1404	0.6605	0.9195	0.5353	0.5813	0.6957	0.3285	1.2055	1.0772	1.3991	0.9248	1.0727	1.0477	0.7823	0.4667	0.8617	0.7306
Solyc07g022910.3	10.6667	21.2652	15.1192	8.4889	12.6118	10.6425	5.0047	7.105	7.2297	17.1263	15.8191	15.4183	7.4114	6.005	6.167	7.8708	6.5693	6.0942
Solyc02g062953.1	0	0	0	0	0	0	0	0	0	0	0	0	0	0	0	0	0	0
Solyc12g014320.2	1.2264	2.2235	2.2055	2.0218	2.425	2.3274	0.9429	0.9249	2.0067	1.9997	1.4506	2.3698	1.8293	2.0564	2.1198	1.6909	0.9905	2.1359
Solyc09g015535.1	0	0	0	0	0	0	0	0	0	0	0	0	0	0	0	0	0	0
Solyc09g007650.3	0	0	0	0.0371	0.2201	0.0475	0.0637	0.3302	0	0.0402	0.1812	0.1329	0.3257	0	0.1288	0.0342	0	0
Solyc10g085250.2	0	0	0.079	0.2816	0	0.0844	0	0.4702	1.0841	0.0925	0	0	1.0967	0.2949	0.7895	1.3154	1.483	2.8028
Solyc02g068530.4	14.5216	14.0973	16.2486	29.2552	26.2225	26.4485	19.2724	15.2749	17.9044	14.5016	15.5593	18.3312	26.3271	29.5117	27.867	20.6702	21.5999	21.874
Solyc04g076400.3	0.7446	0.6757	0.3601	5.2641	2.4283	1.7599	3.7301	2.8599	2.7105	1.1966	1.5853	1.7892	4.5884	6.321	6.0633	3.2322	3.8338	3.3954
Solyc02g086770.3	3.429	2.5725	4.4641	2.0466	3.1434	4.7485	1.1757	3.6413	1.8497	7.5934	5.527	4.3788	11.5416	13.6807	13.6354	8.6906	7.251	7.4397
Solyc08g065480.3	9.5882	14.5912	13.3202	9.785	13.7314	13.6011	6.8262	8.8737	9.757	11.055	8.8043	7.9312	8.7807	8.9867	8.3297	7.3644	7.8502	5.9998
Solyc02g060590.2	0	0	0	0	0	0	0	0	0	0	0	0	0	0	0	0	0	0
Solyc12g013710.2	6.981	12.688	5.7321	15.1363	8.7331	10.9544	3.8089	4.5323	1.8387	18.5064	37.3982	13.7666	17.7236	23.8756	25.3183	10.6473	12.2926	25.1303
Solyc09g083160.3	0	0	0	0	0	0	0	0	0	0	0	0	0	0	0	0	0	0
Solyc05g056550.3	0.0474	0.1075	0	0.2639	0.4805	0	0.3275	0.3706	0.1012	0.1117	0.0807	0.0809	0.1184	0.1968	0.1561	0.1166	0.1961	0.2189
Solyc03g026140.4	1.3509	2.1319	2.1341	2.5294	3.5879	3.4479	0.955	1.0466	1.6248	0.7462	0.9929	0.5925	2.6108	2.0534	1.1552	0.8414	0.5287	0.5751
Solyc08g014397.1	0	0	0	0	0	0	0	0	0	0	0	0	0	0	0	0	0	0
Solyc03g077905.1	0	0	0	0	0	0	0	0	0	0	0	0	0	0	0	0	0	0
Solyc04g039670.3	0	0	0	0	0	0	0	0	0	0	0	0	0	0	0	0	0	0
Solyc03g150139.1	0	0	0	0	0	0	0	0	0	0	0	0	0	0	0	0	0	0
Solyc08g044410.1	8.9301	8.6908	4.7711	13.1542	11.3926	14.6924	13.1686	10.3478	9.6007	7.1854	7.9735	6.9113	10.69	11.0329	14.0845	7.6834	9.6418	7.0229
Solyc09g008020.4	8.7793	10.4939	8.4672	7.1582	11.3542	10.1082	6.5384	7.8832	9.7142	8.5341	6.861	7.6212	5.9136	5.441	4.5119	5.8744	3.3518	5.2006
Solyc03g123850.2	3.1801	2.8463	2.4637	4.1847	4.3132	4.9775	4.821	3.6998	3.9722	2.1573	1.8242	2.3181	4.8526	3.3999	4.4994	3.5339	2.9596	2.7933
Solyc01g111190.4	3.2202	3.786	5.1729	3.0206	2.9112	4.0342	4.2197	4.2802	3.6228	2.7888	3.0943	2.1998	3.0709	2.5486	2.9163	2.7921	2.6838	2.2242
Solyc02g078230.2	10.8528	14.6359	12.558	9.65	9.9365	12.5598	8.4197	8.5521	9.477	9.7823	9.4671	8.7006	5.0342	5.5034	5.7269	7.0783	6.8315	6.0052
Solyc03g095710.4	4.1351	4.6459	3.9383	5.9911	8.935	7.6505	4.2605	6.7776	6.172	2.822	1.8033	2.0221	4.4816	4.6276	3.3833	3.5415	3.3895	3.1433
Solyc10g005310.3	11.3864	14.3827	16.0075	12.6143	16.6059	14.0142	7.4987	13.2776	10.1034	9.8347	9.0119	8.7121	8.0395	7.4163	8.1091	5.8967	5.1727	4.2826
Solyc07g054330.4	0.8863	0.9855	0.5926	1.9166	2.0006	2.7093	1.1817	1.0009	1.0275	0.7236	0.6918	0.5034	2.2882	2.2066	2.6377	1.9799	1.7677	1.2218
Solyc03g115300.2	0	0.1307	0.3792	0.4934	0.317	0.6505	0.3009	0.0253	0.1632	0.1096	0.04	0	0.1242	0.2733	0.3286	0.1449	0.0735	0
Solyc06g076520.1	1226.94	452.917	94.9925	32.5774	40.028	36.694	47.3192	73.4491	39.8081	152.023	150.287	331.127	55.2581	53.2801	47.669	86.2512	159.097	194.516
Solyc05g007540.3	0	0	0	0	0	0	0	0	0	0	0.0604	0.1772	0.0352	0.0566	0.104	0	0	0
Solyc10g083280.4	53.4119	46.5474	54.4587	70.8559	73.8332	69.0066	75.2803	59.4759	60.2132	101.09	97.5789	137.377	77.5892	79.8517	89.3408	93.8793	94.5196	102.844
Solyc03g078820.2	0	0	0	0	0	0	0	0	0	0	0	0	0	0	0	0	0	0
Solyc12g009230.3	4.6039	5.0286	5.7967	6.8476	8.696	8.9933	4.8235	4.0618	4.4848	6.4259	5.0744	5.6261	5.2588	5.7442	5.1391	4.4724	3.2731	2.7035
Solyc08g023590.4	3.7322	4.4896	4.6895	6.9508	8.5207	9.2078	3.0239	3.3897	3.0549	3.4054	3.3617	2.3869	4.6749	4.944	4.9492	2.8072	3.1015	2.4037
Solyc01g090110.2	0	0	0	0	0	0	0	0	0	0	0	0	0	0	0	0	0	0
Solyc10g007270.4	0.0502	0	0	0.1893	0	0	0.1104	0	0.1006	0	0	0	0	0	0	0	0.1539	0
Solyc06g008750.1	1.4309	0.6934	0.2362	7.1721	5.5729	8.5977	0.1419	0.8728	1.3253	0.1072	0.2754	0	0.6997	0.7681	0	0.1041	0.2258	0
Solyc11g010245.1	0	0	0	0	0	0	0	0	0	0	0	0	0	0	0	0	0	0
Solyc12g097010.1	0.7236	0.4398	0.3352	2.6805	1.5771	1.7306	1.192	0.703	0.515	0.586	0.6161	0.7181	2.2564	2.5349	2.2597	1.1484	1.4728	1.132
Solyc08g044337.1	0	0	0	0	0	0	0	0	0	0	0	0.0415	0	0	0	0	0	0.0218
Solyc03g078830.1	0.63	0.2822	0.7612	0.9862	1.0147	1.1861	2.6775	3.1675	1.9042	3.04	4.1642	3.6963	3.5095	5.641	4.9596	2.782	3.1663	4.1092
Solyc09g010320.3	1.3726	1.1279	1.5928	3.4722	3.4379	2.9722	1.6217	1.9851	2.2039	1.0462	0.877	1.301	3.7498	2.4247	3.0367	2.3651	2.1067	1.924
Solyc05g025910.3	16.9977	27.4125	19.4977	14.5812	16.1988	16.0265	22.134	22.7227	24.8749	14.1311	14.3074	11.0978	16.4417	11.6863	12.15	13.0074	13.8591	13.0716
Solyc07g052150.4	2.8757	9.6563	21.9104	2.6875	15.1695	39.8881	0	0.286	0.1139	0.9402	0.0773	0.1251	0.344	0.1953	0.1672	0.0351	0	0.0706
Solyc02g086870.4	8.5984	8.772	7.7269	10.0156	10.3515	11.1194	6.7201	10.2342	8.1681	9.5819	7.4997	7.2061	12.0001	9.2263	8.984	9.1827	8.2726	7.0088
Solyc10g077030.2	10.7645	9.6938	12.0431	17.1695	18.5043	21.4871	11.528	12.8306	13.018	14.525	12.4728	14.3008	19.5618	17.5116	20.7007	16.2765	14.6452	14.2846
Solyc01g091730.3	156.035	178.367	181.365	138.42	196.925	190.648	133.359	154.543	134.022	200.785	168.519	197.617	145.054	123.532	138.099	140.184	126.558	133.641
Solyc11g008400.2	0	0	0	0	0	0	0	0	0	0	0	0	0	0	0	0	0	0
Solyc02g089080.2	131.185	120.908	131.944	207.66	146.306	151.31	179.827	145.207	132.993	84.8026	62.1468	64.5172	153.29	134.665	118.987	64.0802	57.3935	66.6421
Solyc04g025840.3	0	0	0	0	0	0	0	0	0	0	0	0	0	0	0	0	0	0
Solyc12g037980.2	14.396	17.1997	15.6316	20.8549	24.06	22.4625	14.4235	15.173	16.3611	12.3217	10.3757	11.9266	16.8369	17.7902	16.9447	12.4236	10.3745	10.9332
Solyc01g107930.3	5.4802	5.3158	4.432	9.6086	10.6044	10.8031	6.6829	8.2643	6.8225	4.7168	4.0499	3.8258	7.6719	7.4916	6.539	6.0567	5.6591	4.8312
Solyc09g014990.4	34.2132	16.8846	15.9588	20.8786	29.4619	29.369	1.2706	31.1168	19.4739	11.587	20.245	14.057	0.4795	0.267	0.4312	0.715	0.3851	0.1192
Solyc01g097920.3	14.6741	14.5454	19.3283	33.0579	44.57	34.1413	18.7714	18.1567	19.9907	17.7171	15.583	17.8048	26.1429	25.1191	27.3048	13.9271	11.2128	14.8003
Solyc06g065820.3	1.9851	0.7008	1.0381	1.2886	1.077	1.4016	0.5544	0.7394	0.6506	0.7958	1.0598	2.577	0.4301	1.857	1.3174	1.1881	1.5691	1.16
Solyc03g096355.1	0.0594	0	0.2307	0.1835	0.3108	0	0.5855	0.04	0.7665	0	0.0369	0.1078	0.5358	0.4881	0.867	0.4589	0.5124	0.4015
Solyc06g010170.3	0	0	0.2339	1.6984	0.9609	1.3715	0.3892	0.4713	0.3414	0.477	0.4216	0.5357	1.4499	1.538	1.299	0.9719	0.846	0.7968
Solyc05g004000.1	1.455	1.0841	1.4766	0.9919	1.4708	1.7144	2.0061	2.2477	1.5876	0.6899	0.7532	0.571	0.6382	0.3491	0.1867	0.7349	0.5509	0.6043
Solyc04g072032.1	14.345	17.1473	20.1421	29.1731	35.1105	31.676	23.0644	32.2463	31.4597	20.6303	20.2516	23.3098	49.7882	52.5939	62.8057	27.0034	27.3053	25.2674
Solyc07g008860.3	6.435	6.8897	6.7201	10.4931	13.7824	12.8952	6.1213	7.8724	7.9174	6.5132	6.6032	7.7976	7.5213	8.7404	9.3466	7.9244	7.2343	6.1865
Solyc11g062030.1	6.8782	8.8493	4.1597	5.8782	8.1308	8.8465	8.3722	5.5368	4.3206	4.1015	5.1311	5.7845	5.4451	7.3922	5.7227	5.8512	6.1138	4.9023
Solyc03g121070.3	3.1055	2.4019	2.909	28.1011	21.7291	30.7911	2.4608	3.5362	5.0098	12.4746	8.6424	14.2527	59.3068	55.7394	63.5771	15.21	12.23	12.7511
Solyc02g065730.2	0	0	0	0	0	0	0	0	0	0	0	0	0	0	0	0	0	0
Solyc11g040400.1	0	0	0	0	0	0	0	0	0	0	0	0	0	0	0	0	0	0
Solyc06g050210.3	4.1546	4.5774	3.3984	4.6107	5.2766	5.4251	2.9673	3.5432	4.0976	2.6478	2.6886	2.3215	3.8311	3.1254	3.9601	1.7375	2.7842	1.8942
Solyc08g082510.1	0.0437	0.1083	0.139	0	0.1208	0.1175	0	0	0.0389	0	0.0312	0.2132	0	0	0.0841	0	0	0
Solyc12g008390.3	15.1127	15.9136	15.4357	20.6492	20.2291	19.7157	18.927	17.013	15.3701	10.6707	11.5166	10.4107	14.7438	16.2711	17.0602	12.004	13.3458	11.4509
Solyc02g093120.4	12.5448	11.288	11.5297	17.9289	19.8511	19.8658	13.7601	16.4186	11.895	9.8564	5.6909	7.4978	10.6551	9.0398	8.9101	9.8803	4.8408	5.3437
Solyc08g076440.4	7.4921	9.1189	8.8339	8.3504	10.7103	9.7437	7.5483	7.7854	8.5487	7.9679	7.058	7.3624	7.302	7.3125	6.5301	7.9132	8.0188	8.1744
Solyc07g006970.4	1.5795	1.9584	1.8508	4.3296	4.9946	5.7337	1.905	2.3964	2.416	1.0277	1.5187	0.9713	3.3257	3.4788	3.6517	1.2842	1.6145	1.2514
Solyc12g010510.2	0	0	0	0.0355	0	0	0	0	0	0	0	0	0	0	0	0	0	0
Solyc10g054730.1	0.1807	0.1539	0.3718	1.3259	0.7606	1.0041	0.2725	0.5004	0.203	0.2487	0.2413	0.2577	0.8751	1.0759	0.8139	0.2909	0.1652	0.427
Solyc10g037920.1	0	0	0	0	0	0	0	0	0	0	0	0	0	0	0	0	0	0
Solyc01g016725.1	0	0	0	0	0	0	0	0	0	0	0	0	0	0	0	0	0	0
Solyc04g071500.4	0.509	0.1212	0.5218	1.1534	0.3386	0.1216	1.4449	1.0386	0.9229	0.7914	1.6872	1.2902	2.2507	1.909	2.3754	1.878	1.8634	2.1243
Solyc11g007650.1	2.4336	2.3413	2.191	1.5824	2.5997	2.4362	1.7001	1.2802	1.4913	1.991	1.8638	0.9409	0.9811	1.8871	1.5996	1.4037	1.1323	1.4711
Solyc10g037930.2	0	0	0	0	0	0	0	0	0	0	0	0	0	0	0	0	0	0
Solyc04g028465.1	0	0	0	0	0	0	0	0	0	0	0	0	0	0	0	0	0	0
Solyc10g036770.1	0	0	0	0	0	0	0	0	0	0	0	0	0	0	0	0	0	0
Solyc06g074950.1	0	0	0	0.4994	0	0	0	0	0	0.0611	0	0.276	0	0	0	0	0	0
Solyc08g078580.3	0	0.0276	0	0.0392	0.0508	0.0869	0.1842	0	0	0.0371	0.1172	0	0.1635	0	0.2002	0.0557	0.0241	0.1168
Solyc05g007650.1	0	0	0	0.206	0.1992	0.3207	0.1855	0.1041	0	0.2352	0.1076	0.0737	0.6192	0.7336	1.7218	0.1604	0.2508	0.062
Solyc12g009345.1	0	0	0	0	0	0	0	0	0	0	0	0	0	0	0	0	0	0
Solyc07g041960.2	0	0	0	0	0	0	0	0	0	0	0	0	0	0	0	0	0	0
Solyc05g006450.3	0.2521	0.4091	0.4482	1.852	2.1447	2.456	0.1739	0.4326	0.2952	0.3681	0.3466	0.2855	1.651	2.6263	2.2988	0.2375	0.4595	0.4418
Solyc07g032300.1	0	0	0	0	0	0	0	0	0	0	0	0	0	0	0	0	0	0
Solyc02g011840.1	0	0	0	0	0	0	0	0	0	0	0	0	0	0	0	0	0	0
Solyc06g071110.3	3.3853	4.409	4.3313	5.241	5.7093	5.4383	5.8906	4.9252	4.3174	2.7592	3.1665	3.2995	4.9795	4.8057	3.3621	2.8343	2.825	3.139
Solyc04g076960.4	2.0523	2.2818	2.4888	2.6111	2.4272	2.8301	1.6199	2.2224	1.8477	3.13	2.6343	2.6201	2.9506	2.8335	3.0324	2.2283	2.3067	2.4772
Solyc12g044560.1	0	0	0	0	0	0	0	0	0	0	0	0	0	0	0	0	0	0
Solyc01g005550.3	71.06	52.1177	51.8782	65.7502	43.9893	44.8494	84.0339	64.7697	62.6562	43.1623	51.4448	49.9712	42.8396	46.6318	39.822	50.3281	52.5949	56.4251
Solyc08g016310.3	70.133	102.329	103.061	12.7458	12.6831	12.766	17.1641	25.1338	27.5002	69.8377	75.2676	63.0039	5.1992	4.5955	5.0532	13.5111	11.8936	10.2474
Solyc06g066670.4	1.1277	0.7724	0.4626	2.0176	1.2554	0.7825	1.9776	1.0604	0.9393	0.9397	0.8791	1.6117	0.6696	0.9391	1.347	1.0393	0.7692	0.9541
Solyc10g005690.3	1.6535	0.8335	1.2462	6.7361	4.2886	3.8041	4.1846	2.9412	3.6539	1.558	2.3355	2.0752	5.568	6.8002	6.1242	3.4987	4.5397	5.8827
Solyc06g008366.1	0	0.0245	0	0.2199	0.2673	0.1759	0.1956	0.1356	0	0	0	0.0875	0.1559	0.0612	0.1456	0	0.0945	0
Solyc01g104660.3	16.4484	16.8163	17.5313	14.028	15.5235	15.2395	16.2557	19.7803	15.2736	11.0902	13.245	10.2258	9.7827	8.219	8.1718	9.1199	8.8161	7.9058
Solyc12g006003.1	94.6262	79.3572	87.3703	68.817	64.749	71.6041	76.2611	69.6368	73.792	62.7686	61.8838	69.7792	59.21	53.7804	50.2601	62.7116	58.6926	65.5487
Solyc03g078420.4	0	0	0	0	0	0	0.049	0	0	0	0	0	0.1049	0	0	0	0	0
Solyc03g114690.4	0.3436	0.3386	0.2365	1.1286	0.8764	0.4626	0.7563	0.3035	0.3624	1.9473	1.478	2.3341	1.4101	1.9228	2.1058	1.9412	1.4232	1.9794
Solyc03g034370.1	100.455	82.7748	139.64	173.53	186.006	241.837	89.7761	68.847	85.7031	207.317	112.169	132.119	164.879	173.796	180.042	170.21	131.156	133.884
Solyc09g060140.3	0	0	0	0	0	0	0	0	0	0	0	0	0	0	0	0	0	0
Solyc02g080070.3	17.825	30.4336	40.5258	37.3995	50.3767	70.9449	1.9427	5.5155	5.4587	31.5973	24.8436	24.5671	20.6492	18.7363	19.8875	4.4666	4.1308	3.4181
Solyc03g112350.4	9.6278	12.3945	10.934	11.7158	14.0569	15.4533	8.9722	8.3815	9.8127	7.7979	7.5141	6.6195	11.0828	8.4915	10.3574	8.6263	7.8178	8.3241
Solyc01g056657.1	0	0	0	0	0	0	0	0	0	0	0	0	0	0	0	0	0	0
Solyc01g150164.1	9.1885	18.8729	28.6632	50.528	76.5859	96.8585	12.0222	16.3605	14.0714	34.0075	25.2353	25.7816	53.2169	42.776	41.1692	23.5575	12.7787	15.6212
Solyc04g078870.4	2.8809	5.9137	5.152	19.906	21.6653	22.0648	2.6821	2.7661	3.3194	6.3884	8.515	10.2703	21.8223	22.4526	19.1785	5.5934	6.4619	5.9664
Solyc08g008350.3	29.6961	33.4079	35.056	39.1249	45.4227	43.3313	28.5617	29.2118	32.1504	24.749	20.0235	21.5744	35.0298	33.7797	30.6733	24.2624	21.4166	25.0075
Solyc10g062110.2	0	0	0	0	0	0	0	0	0	0	0	0	0	0	0	0	0	0
Solyc03g117280.4	42.236	59.3681	38.6588	16.4241	11.5109	9.7604	29.2178	27.5956	27.1933	34.9648	47.5205	45.5717	6.5428	7.107	5.1665	12.0993	12.7937	11.5568
Solyc04g054227.1	0	0	0	0	0	0	0	0	0	0	0	0	0	0	0	0	0	0
Solyc11g021050.1	0	0	0	0	0	0	0	0	0	0	0	0	0	0	0	0	0	0
Solyc11g067030.2	1.1426	1.6019	1.6676	1.9642	1.5386	1.7392	1.9449	2.3247	1.917	2.0455	1.9716	2.0794	1.3977	1.111	1.4598	1.7147	1.7273	1.2424
Solyc08g065160.3	35.3223	43.568	42.1116	37.4078	57.7836	38.7166	29.7584	30.2703	28.3142	18.433	18.873	17.1125	26.2597	24.8994	23.5396	18.6463	19.058	17.4757
Solyc04g014750.1	0	0	0	0.0785	0	0	0	0	0	0	0	0	0	0	0	0	0.0613	0
Solyc04g008510.3	18.1706	17.947	17.8013	26.8091	24.2422	22.7045	20.1149	20.4406	21.1973	13.5205	13.6545	13.149	19.1837	19.6784	16.4382	15.3069	17.2289	15.7559
Solyc08g008340.4	2.0325	2.6534	2.4135	4.1403	2.3003	3.6915	2.2423	2.5348	2.1815	4.3892	5.0737	6.8433	6.045	7.3207	5.8872	3.5718	4.4202	4.848
Solyc01g006880.4	8.4929	9.5365	6.9653	11.2248	12.5623	11.056	9.0417	7.007	8.0589	5.9291	5.47	4.8247	7.2526	7.4197	7.9473	6.9479	6.4974	5.8445
Solyc03g120530.3	3.8208	3.466	4.8512	3.4556	2.7333	4.0971	3.5105	4.6969	3.8572	2.8672	3.7031	2.9219	6.0258	5.3643	6.0496	4.9293	4.9058	4.332
Solyc09g009510.4	8.5407	10.6341	11.2146	19.1718	17.3927	16.4771	12.8873	11.7525	12.2108	11.7062	9.8402	12.8301	16.4237	20.9137	20.0795	12.6436	13.7046	15.2801
Solyc01g099440.4	1.2484	0.7392	0.6899	0.4352	0.3476	0.699	0.5711	1.0876	0.4716	2.0262	1.4158	1.1677	0.3372	0.7065	0.7301	0.6002	1.0584	0.4851
Solyc05g024140.1	0	0	0	0	0	0	0	0	0	0	0	0	0	0	0	0	0	0
Solyc08g023410.1	0	0	0	0	0	0	0	0	0	0	0	0	0	0	0	0	0	0
Solyc06g072850.1	0.0295	0	0	0.1307	0	0	0	0	0	0	0	0	0	0	0	0	0.0975	0.0494
Solyc01g057090.4	7.5376	7.7395	8.6772	9.4637	14.9024	11.8634	7.3589	8.1844	7.5003	4.9656	5.0988	4.4329	5.4215	5.4777	3.717	3.9069	3.5346	4.2921
Solyc01g067250.3	1.2095	1.8978	1.122	1.3525	2.0459	1.6437	1.7906	1.3083	1.3329	1.5035	1.1976	2.0863	0.7536	1.2042	0.9529	1.741	1.4998	0.7685
Solyc08g075650.3	12.3399	12.2437	11.1651	14.0571	10.1996	11.9097	15.2484	11.8055	13.9805	11.7655	9.2277	12.1302	11.3225	11.1015	10.5393	11.9702	10.5552	10.0356
Solyc01g108390.3	4.1727	7.2085	5.0096	11.8296	7.1503	10.9907	9.567	7.6636	6.1248	7.4956	5.9272	9.0361	9.0084	7.7984	7.4845	4.3294	4.0543	3.8914
Solyc08g082050.3	0.0734	0	0.1076	0.0389	0	0.1407	0.0669	0	0.0723	0.0849	0	0.2259	0.0792	0.1385	0.1485	0.1064	0.13	0.1006
Solyc06g050790.3	4.9996	2.8912	2.3338	5.0465	4.7759	4.9726	2.7562	3.5937	2.8668	1.3084	1.1939	1.1918	3.7765	2.5826	2.7578	1.9983	1.456	1.3637
Solyc12g019977.1	2.3639	2.1594	2.3572	4.9262	5.8425	5.5178	2.1181	2.8137	2.5032	2.6249	1.7098	1.9471	5.012	3.2997	3.8875	2.613	2.3713	2.5103
Solyc03g034396.1	0	0	0	0	0	0	0	0	0	0	0	0	0	0	0	0	0	0
Solyc08g075050.3	0	0	0	0	0	0	0	0	0	0	0	0	0	0	0	0	0	0
Solyc05g013730.3	4.2452	4.7186	3.8607	14.6032	17.4113	17.4511	6.7785	6.3286	6.6492	3.5147	4.4055	4.1581	13.8634	13.8212	13.4438	6.6499	6.9392	6.4263
Solyc01g011105.1	1.6032	0.8227	0.1796	1.3952	1.1111	0.8736	0.7088	0.8144	0.5141	0.7977	1.0072	0.6794	0.5715	0.7299	1.2271	0.5938	0.8182	0.5659
Solyc12g087830.2	7.9803	4.7967	8.6288	9.7017	13.0759	11.9052	7.4676	10.1049	10.1836	17.1752	17.0669	16.3161	16.8688	15.4084	9.5631	17.6678	19.8567	17.2056
Solyc07g021750.1	11.7685	8.6707	11.1429	9.576	9.0007	9.6987	10.6122	12.7703	12.594	7.0154	8.9108	7.4016	9.0389	9.1212	8.501	9.9173	9.4304	9.7031
Solyc04g050365.1	0	0	0	0	0	0	0	0	0	0	0	0	0	0	0	0	0	0
Solyc03g020070.4	0	0	0	0.7392	0	0.0585	0	0.5484	0.3461	0	0	0	0.0851	0	0	0	0	0
Solyc06g008580.3	2.8502	2.2927	2.3641	1.6859	0.6179	1.3125	3.4105	0.9027	2.309	1.873	2.7359	3.018	2.4978	4.6468	0.8722	3.743	2.3892	4.7408
Solyc01g017820.3	0	0	0	0	0	0	0	0	0	0	0	0	0	0	0	0	0	0
Solyc12g008790.3	13.5258	11.6525	11.1011	12.1478	11.5117	14.0124	12.4065	12.0594	14.0962	10.7645	9.6656	7.7521	9.8501	9.6964	10.255	10.486	10.2988	9.4071
Solyc07g047770.4	18.8472	17.6824	15.3883	23.9686	27.5157	26.3148	20.0391	16.5905	18.9653	13.9908	17.1678	17.6722	17.1777	17.1053	16.6051	14.7954	14.7852	14.8661
Solyc10g046790.1	0	0	0	0	0	0	0	0	0	0	0	0	0	0	0	0	0	0
Solyc02g083630.3	1.0991	0.4689	1.3315	2.2584	1.2816	2.0983	3.5767	4.7414	2.5191	2.769	5.1608	4.1786	4.8788	4.5633	3.7744	2.7582	4.0941	3.303
Solyc03g005220.4	5.5398	4.7666	5.3986	5.0222	6.2134	6.7118	4.4179	3.0544	3.9953	7.6551	6.5703	8.3961	8.2246	9.4488	9.5009	6.8843	6.4904	7.4122
Solyc00g254910.1	0	0.098	0.0564	0.0571	0.0395	0.1342	0	0.0215	0.0501	0	0	0	0.1824	0.0321	0	0	0.0716	0.0547
Solyc04g025690.1	0	0	0	0	0	0	0	0	0	0	0	0	0	0	0	0	0	0
Solyc11g007940.2	0.6764	0.8656	1.204	5.0137	4.4907	6.0254	1.47	1.278	1.6626	2.4533	2.2656	3.0038	9.4024	9.1148	11.6155	3.7972	4.1445	3.4684
Solyc10g084400.2	170.567	114.359	139.07	15.8599	30.5122	56.3779	64.1979	99.6227	100.242	120.728	90.9149	125.451	38.268	32.4794	40.223	135.971	130.045	104.571
Solyc04g063415.1	0	0	0	0	0	0	0	0	0	0	0	0	0	0	0	0	0	0
Solyc08g078190.2	3.221	1.3565	3.9775	5.1758	8.3266	4.1884	2.5603	4.527	6.0661	0.8162	3.0084	1.0348	1.0544	1.0519	1.0082	0.6532	0.3607	0.4644
Solyc01g017040.1	0	0	0	0	0	0	0	0	0	0	0	0	0	0	0	0	0	0
Solyc03g083670.3	0	0	0	0	0	0	0	0	0	0	0	0	0	0	0	0	0	0
Solyc02g080940.3	45.2246	44.0396	50.4419	50.4011	60.5248	64.0541	37.8261	50.4168	43.5038	45.0315	37.0923	47.1304	47.0052	47.0353	50.0787	39.6542	36.9374	38.8828
Solyc01g097730.4	3.4521	3.5508	3.846	5.3064	5.6009	4.9965	3.6811	3.5238	4.1663	2.4865	2.1482	2.8391	4.2796	4.12	4.2074	3.4732	2.9177	2.5944
Solyc06g008970.4	4.9847	5.8485	4.9514	4.626	4.9276	4.1754	4.8633	3.747	4.0339	4.3354	4.0377	2.9918	2.6806	3.1338	2.7772	2.0973	2.8595	2.2193
Solanum_lycopersicum_newGene_2668	0	0	0	0	0	0	0	0	0	0	0	0	0	0	0	0	0	0
Solyc03g113900.4	1.2317	0.8932	0.873	10.1136	10.4301	8.7459	3.8491	7.115	9.06	2.5599	3.1256	4.5357	14.1722	13.8481	15.7463	6.3128	7.1727	5.8238
Solyc01g099130.3	48.0826	44.6174	47.4138	27.4901	29.2202	27.5813	40.2575	50.5483	47.5401	36.7888	36.2406	40.7429	16.3464	15.9966	16.0326	23.3515	20.1253	20.8815
Solyc03g121480.3	11.5767	10.8956	12.9996	26.5063	27.5948	27.8504	14.5241	17.0532	16.1532	18.3327	14.9412	17.9759	26.8134	20.6609	26.467	21.006	17.2409	19.5181
Solanum_lycopersicum_newGene_996	3.7171	2.8567	3.2535	1.9607	2.1228	1.8598	2.0993	2.3816	2.3509	2.3423	2.1547	1.541	0	0	0	1.1486	1.1793	0
Solyc02g068900.3	8.3466	10.1668	13.5022	11.3346	17.5211	20.1626	5.757	6.1452	7.3009	11.1345	7.4676	9.6257	15.0646	14.1142	11.6054	11.2972	7.3664	7.8632
Solanum_lycopersicum_newGene_994	0.0536	0	0.13	0.1949	0	0.0509	0.1296	0.032	0.0838	0.3271	0.2328	0.3323	0.9638	0.8029	0.8365	0.6761	0.3577	0.6896
Solanum_lycopersicum_newGene_992	0	0	0	0	0	0.7744	0	0	0	0.0648	0	0	0.1921	0	0	0	0.0782	0
Solanum_lycopersicum_newGene_993	0	0	0	0	0	0	0	0	0.1565	0.0822	0	0	0.1457	0	0.1627	0	0	0
Solanum_lycopersicum_newGene_990	0	0	0.2443	0.2717	0	0	0	0	0	0.0583	0	0	0.1569	0.0801	0	0.1903	0.1008	0.1102
Solyc07g055670.1	0.7481	2.0553	2.1614	2.1562	2.6632	2.2118	0.2459	0.6154	0.7507	3.2875	1.5892	2.774	0.3333	0.2157	0.9042	0.1919	0.0131	0.1716
Solanum_lycopersicum_newGene_999	0.2519	0.095	0.0817	1.1984	0.4591	0.8149	0.5024	0.4572	0.5386	0.5709	0.1879	0.4519	0.6472	1.1986	0.7722	0.7538	0.9525	0.3921
Solyc01g094570.3	3.9217	4.1553	3.585	7.4379	8.7104	10.1408	2.9774	2.5759	4.0962	2.725	2.3922	2.355	6.5325	4.0242	6.1256	2.8431	2.5641	2.4076
Solyc01g094010.3	36.893	72.9025	68.2405	23.8521	23.7368	21.3053	31.3658	32.9596	29.9897	51.5545	74.1059	45.9031	14.7454	16.5993	15.3157	21.0985	22.4407	22.8548
Solyc08g028860.1	0	0	0	0	0	0	0	0	0	0	0	0	0	0	0	0	0	0
Solyc12g096810.2	0.1586	0.1121	0.0934	0.8088	1.2927	0.7083	0.2541	0.3137	0.6556	0.2614	0.3512	0.1738	1.0061	1.7291	1.2395	0.4487	0.452	0.4146
Solyc02g072180.3	4.0133	2.3267	3.2826	14.6544	9.124	9.7414	6.9885	5.7456	5.5367	3.453	5.732	5.2644	11.9211	12.7702	14.9581	5.4987	7.719	7.8852
Solyc05g054200.4	4.6143	4.7489	3.7333	7.5475	9.3103	8.7261	6.8985	5.3621	5.1655	4.3748	5.4555	5.4678	8.3518	7.9212	8.9844	5.5011	5.337	5.0139
Solyc01g097070.4	0.1344	0.0439	0.1601	0.5114	0.0206	0.1851	0.2427	0.3057	0.0982	0.2933	0.6102	0.9901	0.7386	0.7468	0.7711	0.8812	0.1884	0.8119
Solyc04g082950.4	3.6349	3.1623	3.6217	9.3304	4.1412	5.396	12.0097	8.4143	8.8886	5.6824	6.602	6.2347	8.0226	11.5061	10.142	9.7439	11.8817	11.1539
Solyc05g012130.4	20.7312	21.7099	23.5241	22.3656	31.0512	28.6105	18.223	20.0511	18.4505	13.5931	16.4765	12.9121	16.759	15.638	14.4627	12.3502	14.0067	11.966
Solyc12g008850.3	0.0615	0	0.0822	0.0481	0.0271	0.0235	0	0.0085	0	0.0457	0.0157	0.0215	0.0966	0.0244	0.0792	0.0198	0.0271	0
Solyc09g090790.3	0	0	0	0.2155	0	0	0	0	0	0	0	0	0	0	0	0	0	0
Solyc11g073075.1	7.8033	0.5657	3.4175	2.6327	4.099	2.0744	0.2529	3.9321	4.8182	0.9847	2.8259	2.2262	0.1116	0.027	0.1854	0.1881	0	0
Solyc07g021590.1	0	0	0	0	0	0	0	0	0	0	0	0	0	0	0	0	0	0
Solyc02g086000.2	0	0	0	0	0	0	0	0	0	0	0	0	0	0	0	0	0	0
Solanum_lycopersicum_newGene_669	0.6967	0.2092	0.4108	0.5276	0.2703	0.5216	0.5505	0.1394	0.6523	0.1237	0.2989	0.1332	0.2246	0.1603	0.5358	0.1522	0.2285	0.0723
Solyc12g096590.3	6.7191	8.3615	9.0977	19.5015	16.7731	17.8835	11.6225	11.6997	10.3993	24.7596	18.5594	34.2344	31.4365	31.7049	37.7149	28.8636	20.9225	24.3926
Solanum_lycopersicum_newGene_664	2.8357	4.0972	3.5972	1.7139	2.6825	2.1771	2.2221	1.9576	2.2675	8.1853	10.6147	11.706	3.0744	2.7757	2.4709	2.5524	3.0502	2.9887
Solanum_lycopersicum_newGene_661	0.0779	0	0.0356	0	0.0872	0.2604	0	0	0	0	0	0	0.7036	0	0.6306	0.0991	0.3464	0.2172
Solyc12g008840.2	28.7535	35.1593	22.9118	36.5319	126.776	88.683	21.4656	46.6552	20.9092	6.7739	8.5618	5.6803	8.2342	8.5393	6.099	7.6864	4.5145	5.8323
Solyc05g012120.3	7.9667	7.5228	8.8397	14.7829	15.6607	13.9487	8.1417	10.4232	7.6594	13.6363	9.653	14.0767	11.7134	10.8539	12.7301	10.6725	8.0017	7.8135
Solyc10g008620.3	0.3384	0.5446	1.1885	0.6988	1.515	0.4223	0.3782	0.3296	0.2852	0.6787	0.6722	0.3484	2.7008	2.3762	2.898	4.0041	5.5002	3.9461
Solyc05g009670.3	4.0858	3.8932	3.5482	5.6811	8.8943	7.8414	4.1298	4.2783	3.5269	2.5283	2.5711	2.8931	4.4513	4.2016	3.1833	3.0509	2.7751	2.7068
Solyc01g065670.1	0	0	0	0	0	0	0	0	0	0	0	0	0	0	0	0	0	0
Solyc01g104410.4	2.0324	2.3492	1.6652	6.0744	7.3429	7.3279	3.0261	3.007	2.9935	1.9242	1.547	2.4576	4.6343	4.8631	4.6316	2.7225	2.3482	3.1609
Solyc03g097570.3	0.2201	0.0929	0.2848	0	0.1984	0.1129	0.103	0.2762	0.3331	0.7191	0.7858	0.4242	1.234	0.9367	2.2632	0.7225	1.0231	0.9405
Solyc03g118100.4	1.1541	0.9861	0.8104	1.363	1.7324	1.5115	0.9979	0.9078	1.2852	0.8101	0.7356	0.797	1.2548	0.9548	1.003	0.833	0.8204	0.912
Solyc07g007630.3	9.9527	7.4337	10.2452	15.3178	16.4818	16.9854	8.5592	11.0298	10.6598	8.944	8.0682	9.2567	11.7583	14.9224	11.9419	10.7007	7.4443	8.6905
Solyc01g016970.2	0	0	0	0	0	0	0	0	0	0	0	0.1673	0	0	0	0	0	0
Solyc04g039930.4	0	0	0.1657	0.2698	0.2264	0.3311	0.1626	0.0556	0	0	0	0	0	0	0	0	0	0
Solyc03g112120.3	0	0	0	0.231	0	0	0	0.0635	0	0	0	0	0	0	0	0.0338	0.1078	0.253
Solyc06g053590.4	22.3524	23.8557	23.6316	29.8644	33.8738	30.6267	26.5741	23.9248	25.3054	20.5086	17.7259	19.8678	19.2905	18.4198	17.2792	17.9848	17.1719	15.805
Solyc07g005820.3	0	0	0	0	0	0	0	0	0.0182	0	0	0	0	0	0	0.0229	0	0
Solyc01g096470.3	36.0212	38.9089	42.3593	34.3901	41.7991	35.2188	38.9129	48.9163	39.7764	31.9163	31.2571	31.3735	24.8374	25.2291	20.2013	29.0649	26.2106	26.3347
Solyc08g016100.1	0	0	0	0	0	0	0	0	0	0	0	0	0	0	0	0	0	0
Solyc07g061805.1	5.6052	1.6717	1.8152	1.4746	0.6982	1.7771	0.6839	0.7504	0.784	0.5108	2.1163	0.8395	2.1887	4.7472	6.636	1.9529	2.4789	4.4304
Solyc08g005390.1	0.3941	0.631	0.4294	1.9925	2.4163	2.2394	0.6472	0.7422	0.7666	0.6877	0.8224	0.5546	1.2758	1.8513	2.1678	0.6915	0.5797	0.5708
Solyc10g005150.3	0	0	0	0	0	0	0	0	0	0	0	0	0	0	0	0	0	0
Solyc01g016430.1	0	0	0	0	0	0	0	0	0	0	0	0	0	0	0	0	0	0
Solyc09g019970.3	33.61	30.7079	33.5445	15.5177	17.4624	16.0218	28.142	30.2001	30.1593	25.5385	25.5827	23.6528	11.9791	11.058	9.6488	20.6182	20.9171	18.9596
Solyc00g500130.1	36.109	25.974	38.6439	89.158	109.339	70.7518	134.752	245.842	257.474	14.908	37.6795	18.0004	19.8111	1344.41	28.0987	26.2602	26.0434	277.855
Solyc08g036410.1	0	0	0	0	0	0	0	0	0	0	0	0	0	0	0	0	0	0
Solyc04g081010.2	0	0	0	0	0	0	0	0	0	0	0	0	0	0	0	0	0	0
Solyc06g008100.3	0.1348	0.0766	0	1.3207	1.4064	2.5196	0.1476	0.3048	0.1593	0.1813	0.3501	0.5772	0.9526	0.6896	0.5596	0	0	0
Solanum_lycopersicum_newGene_1722	0.0561	0.16	0.0777	0.1622	0.429	0.2625	0.202	0.138	0.2554	0.0493	0.0229	0	0.0485	0	0.0679	0.0521	0	0.0841
Solyc12g038730.1	0	0	0	0	0	0	0	0	0	0	0	0	0	0	0	0	0	0
Solanum_lycopersicum_newGene_2385	0	0	0	0	0	0	0	0	0	0	0	0	0	0.2648	0	0	0.2601	0
Solanum_lycopersicum_newGene_2386	0.8674	0.7941	0.4532	2.0034	0.7237	2.109	1.6723	1.0187	1.0757	0.9003	0.583	0.6297	2.8646	2.8896	3.4469	2.6218	2.4001	2.3117
Solyc03g119490.4	0.4402	0.4742	0.671	1.1423	1.0976	1.1957	0.8318	0.4805	0.5005	1.1352	0.9413	1.7451	2.0962	2.5247	2.8776	1.007	0.6025	1.9101
Solanum_lycopersicum_newGene_2381	2.362	2.8659	2.0539	3.9774	3.708	2.7597	5.0162	3.5586	3.2864	0.1148	0	0	1.0219	0	0	0.6034	0	0
Solyc03g043700.3	0.8281	0.567	0.5198	0.7449	0.2694	0.3856	0.4191	0.3324	0.2678	0.5576	0.3115	0.2646	0.285	0.4747	0.29	0.4546	0.384	0.3231
Solanum_lycopersicum_newGene_2389	2.4021	1.9906	1.7599	1.8782	1.6149	1.516	1.5693	1.8798	1.7777	1.3635	1.6649	1.3789	1.0472	0.7471	0.9611	0.6198	0.8253	0.8991
Solyc01g096060.4	7.4845	7.5879	9.0806	8.5814	9.1749	8.4526	8.7748	7.1067	7.18	8.514	8.4861	7.6657	8.4414	9.1159	8.927	7.5389	7.2107	6.308
Solyc03g013600.1	0	0	0	0	0	0	0	0	0	0	0	0	0	0	0	0	0	0
Solyc07g027010.1	0	0	0	0	0	0	0	0	0	0	0	0	0	0	0	0	0	0
Solyc12g035845.1	0	0	0	0	0	0	0	0	0	0	0	0	0	0	0	0	0	0
Solyc08g060920.4	15.7673	10.4351	16.5502	10.8087	18.098	22.2202	8.1876	7.8041	13.7872	22.2232	17.4857	17.9158	14.4734	27.0469	45.067	9.9155	8.0149	10.2742
Solyc06g076600.2	0.6702	0.9147	0.4602	0.5412	0.594	0.4387	0.3569	0.2943	0.0262	0.4545	0.2423	0.3265	0	0	0.023	0.1375	0.135	0.1524
Solyc12g049310.2	4.4669	4.2067	4.6818	8.8042	10.3779	11.2644	4.4478	5.6979	7.3658	3.683	3.7138	3.3819	4.8756	6.8882	4.9754	4.1735	3.0915	2.0881
Solyc07g065200.3	8.0034	12.8456	13.2098	56.8595	58.7542	62.141	14.2904	11.9587	12.7832	14.3233	13.4191	19.7661	66.4065	60.9668	51.8238	13.478	14.2277	13.2118
Solyc06g063020.4	4.1732	4.6796	4.1981	5.0771	7.6853	6.2469	5.6223	5.7039	7.7814	2.4475	3.2031	2.3956	5.9492	4.7577	4.514	3.8583	4.0848	3.5905
Solyc12g056170.2	8.2905	12.3582	12.6251	8.7283	7.9841	8.6935	6.2273	7.7977	7.773	8.99	9.6491	8.4236	4.6998	4.3371	4.0574	4.4078	4.4493	4.1048
Solyc01g066730.4	0.9383	0.1677	0.3816	1.5265	1.188	1.9337	0.7934	0.9805	0.7962	0.7955	0.7674	0.6714	1.8937	2.3409	1.841	1.2386	0.6911	1.4512
Solyc10g150110.1	0	0	0	0	0	0	0	0	0	0	0	0	0	0	0	0	0	0
Solyc03g113510.2	0.5129	0.5492	0.7193	0.1646	0.3004	0.3479	0.631	0.695	0.5076	0.3135	0.1302	0.3195	0.2059	0.3863	0.3277	0.344	0.3243	0.5846
Solyc01g106040.3	0.9484	0.6432	0.6546	3.6586	5.3068	5.6619	1.1813	1.4614	1.2683	1.5605	1.1868	1.3019	4.4099	4.8539	5.358	1.5301	1.324	2.1549
Solyc11g020015.1	0	0	0	0	0	0	0	0	0	0	0	0	0	0	0	0	0	0
Solyc02g038800.1	8.8604	9.1729	7.8131	8.6223	10.5974	9.4767	10.0116	10.9199	9.0669	4.2908	8.7142	7.2876	8.8631	9.8046	8.2388	8.9641	11.877	11.468
Solyc03g113500.4	10.3719	9.9094	11.1344	14.1327	14.6638	12.9479	12.546	10.5701	12.9904	9.0355	9.1608	9.0582	11.1421	12.0723	10.4259	10.4741	9.5791	9.2615
Solyc12g036445.1	0	0	0	0	0	0	0	0	0	0	0	0	0	0	0	0	0	0
Solyc08g068230.4	62.5463	46.8706	45.7445	73.6009	68.3623	63.7456	65.2718	59.2324	57.1573	30.7862	28.2247	24.7658	30.6618	25.0967	25.8546	24.9645	21.2617	22.6464
Solyc02g087090.4	0	0	0	0	0	0	0	0	0	0	0	0	0	0	0	0	0	0
Solyc03g044430.3	3.2695	2.3181	2.9463	6.5234	6.2729	7.3945	3.0602	2.7567	3.3353	4.0175	2.91	3.4662	5.4389	4.683	5.8463	3.5635	2.7699	3.2687
Solyc08g150119.1	0	0	0	0	0	0	0	0	0	0	0	0	0	0	0	0	0	0
Solyc12g062810.1	0	0	0	0	0	0	0	0	0	0	0	0	0	0	0	0	0	0
Solyc01g103540.3	322.797	457.733	314.837	464.269	737.766	598.588	231.753	352.168	241.113	89.5952	103.556	72.0157	267.072	215.875	176.662	89.8257	69.5874	63.5531
Solyc10g054450.1	0	0	0	0	0	0	0	0	0	0	0	0	0	0	0	0	0	0
Solyc03g117910.3	0.2415	0.1041	0.0708	0.0269	0.081	0.175	0.0261	0.0753	0.2132	0.0291	0.0649	0	0.086	0.1078	0.0866	0	0.1247	0.0519
Solyc03g097100.1	3.1499	2.0292	1.7608	0.1578	0.1844	0.4038	0.3279	1.2934	0.6297	1.7245	1.7492	1.8345	0.2504	0.0843	0.2449	0.3763	0.6084	0.2397
Solyc09g091100.4	29.6244	31.1754	32.9092	26.1321	26.1677	25.2097	29.9711	31.5522	30.3823	36.226	32.9966	33.5968	23.2464	20.654	23.7688	27.4992	26.035	25.1779
Solyc10g006810.4	0.2638	0.3422	0.1567	0.6519	0.1816	0.4281	0.2674	0.3314	0.187	0.2087	0.1648	0	0.3002	0.5654	0.6795	0.3611	0.1822	0.3331
Solyc11g011560.3	0	0	0	0	0	0	0	0	0	0	0	0	0.0237	0	0	0	0	0
Solyc11g045615.1	0	0	0	0	0	0	0	0	0	0	0	0	0	0	0	0	0	0
Solyc02g086451.1	0.8293	0.1862	1.0077	0.1707	0.2862	0.5167	0	0	0	1.2824	0	0	1.4217	0	0	0	0	0.5935
Solyc04g078280.3	0.9968	0.162	1.0651	0.6414	0.6608	1.0689	0	0.1002	0	0	0	0	0	0.2747	0	0.3623	0.1298	0
Solyc08g048550.3	13.3056	13.9996	12.7985	37.2664	34.0254	34.6991	15.8938	18.3866	19.6625	28.2974	23.2019	28.5873	39.7328	38.2016	41.1596	25.6717	25.1764	26.5784
Solyc05g051490.3	3.2401	5.4778	3.903	6.0189	7.1781	7.854	3.2349	3.6699	3.4065	2.7133	3.3276	3.4832	4.9163	4.869	5.3688	2.9794	3.3439	2.5712
Solyc07g062130.3	53.4065	68.0847	42.4397	38.3024	31.4811	32.6024	39.2053	39.4813	44.2667	55.5508	61.9498	58.0315	49.0012	53.6184	55.2057	62.8448	63.2671	60.9541
Solyc06g069070.1	16.9501	13.1127	5.944	32.389	13.9672	14.4066	12.5169	6.7994	10.6284	15.3025	16.5834	18.3401	11.1127	15.2443	15.8756	6.5337	8.4719	13.7621
Solyc07g021180.3	0	0	0	0	0	0	0	0	0	0	0	0	0	0	0	0	0	0
Solyc02g093330.4	2.9484	1.0108	3.5538	2.4305	3.1367	3.6334	2.3914	5.4778	4.6328	4.984	0.5853	2.9007	1.8812	1.421	2.7581	4.4401	0.5058	0.9199
Solyc03g044662.1	0	0	0	0	0.4611	0	0	0	0.2512	0	0	0	0	0	0	0	0	0
Solyc08g076320.3	20.9476	16.5463	15.157	23.2007	19.3023	21.6338	11.7766	14.0545	13.0349	10.6411	12.1196	12.9194	14.7088	16.2959	14.9926	8.8838	10.3338	8.6779
Solyc02g083420.3	14.6062	15.1392	14.3529	21.1352	23.2354	24.3149	13.5751	15.4137	14.8747	11.6772	10.3217	11.1341	16.0133	16.4315	13.8997	12.0217	10.22	9.62
Solyc07g017730.3	0.8122	0.1426	0.4017	0.777	0.2751	0.1907	0.7737	1.6713	0.8448	1.3316	3.1094	3.0618	1.5297	2.1423	1.8148	1.4193	1.9886	2.1298
Solyc08g068640.4	0.3525	0.3082	0.6016	0.4215	0.5648	0.3285	0.2274	0.7302	1.3395	0.1639	0.6183	0.2611	0	0	0.1479	0	0	0.0525
Solyc11g072960.1	0	0	0	0	0	0.1085	0	0.041	0.0492	0	0	0	0.0534	0	0	0.0308	0	0
Solyc00g500406.1	0.3689	0.6699	0.6486	0.249	0.0243	0.3827	0.4693	0.3511	0.0107	0.0466	0	0	0	0	0	0.057	0.0058	0
Solyc09g007810.4	7.3412	9.6889	7.1285	6.4005	5.9632	7.0999	12.258	10.9958	11.0088	4.9182	7.5856	6.6683	6.334	6.8626	6.3816	7.8979	8.4877	8.6997
Solyc06g007470.3	241.346	353.995	324.717	318.241	443.711	357.524	312.402	346.761	311.065	239.317	221.705	273.989	195.748	198.605	196.616	199.025	195.583	208.257
Solyc03g006370.3	0.8888	1.0174	1.5063	1.6347	2.0767	1.7251	2.3537	1.6904	1.2859	0.8468	0.9611	0.6277	1.2944	1.1168	1.0498	1.1201	0.556	1.565
Solyc10g017690.1	0	0	0	0	0	0	0	0	0	0	0	0	0	0	0	0	0	0
Solyc12g041940.1	0.0407	0.0723	0.0422	0	0.2109	0	0.0526	0	0	0.1123	0.1549	0.1832	0.0611	0	0	0.0473	0	0.0287
Solyc01g103380.4	13.5089	12.1079	13.8335	15.1011	14.6402	17.5288	15.0718	11.9356	15.0344	11.623	9.6684	14.134	14.7477	18.2347	18.5175	10.7852	11.4995	14.1173
Solyc11g072250.2	0.1884	0.2727	0.4265	0.3854	0.2836	0.0692	0	0.7762	0.5368	0.3189	0.3778	0.1106	0.1854	0.3005	0.054	0.2395	0.1131	0.1851
Solyc04g005470.3	0.2504	0	0.2173	0.6338	0.2064	0.2416	0.9444	0.8956	0.6783	1.2571	1.3288	1.5503	0.6465	1.8527	0.8351	0.9067	1.0805	0.7832
Solyc01g087070.4	0.2968	0.3234	0.5788	0.3809	1.0502	1.4326	0.1388	0.2945	0.2151	0.592	0.5761	0.471	0.6359	0.6868	0.606	0.383	0.3827	0.4975
Solanum_lycopersicum_newGene_1128	1.4445	1.3872	1.0418	1.081	1.1072	0.9656	1.0936	0.5287	0.1367	1.3941	1.2162	0.8642	1.1187	1.1884	0.8805	1.3688	0.8043	0.7064
Solyc08g069160.3	3.1224	2.8875	2.99	3.351	4.8179	4.6688	4.9316	4.0606	4.8273	3.1053	2.4963	3.8272	4.1876	3.9849	5.0348	3.7003	3.5485	2.9514
Solanum_lycopersicum_newGene_1124	0	0	0	0	0	0	0	0	0.1392	0	0	0	0	0	0	0	0.0653	0
Solanum_lycopersicum_newGene_1127	0.0776	0.0564	0.3292	0	0	0	0.1446	0.1109	0	0.4341	0.0977	0.1748	0	0.0966	0	0.1242	0	0.2686
Solyc07g150132.1	0	0	0	0	0	0	0	0	0	0	0	0	0	0	0	0	0	0
Solanum_lycopersicum_newGene_1121	0.0353	0.2507	0	0.1553	0.1242	0.0686	0.1832	0.3074	0.0919	0.2578	0	0.2348	0.0712	0.1848	0.0816	0.1962	0.1543	0.472
Solyc03g005450.3	8.3169	13.1459	9.327	23.7032	41.3339	35.7278	7.1074	12.0686	8.7237	2.6286	3.1649	1.9963	12.725	9.9921	4.5619	4.4963	3.1127	1.7758
Solyc10g049410.1	0	0	0	0	0	0	0	0	0	0	0	0	0	0	0	0	0	0
Solyc05g015653.1	0	0	0	0	0	0	0	0	0	0	0	0	0	0	0	0	0	0
Solyc11g012690.3	19.4979	11.4874	18.0026	14.012	12.7799	18.5861	11.652	11.5598	9.3789	22.0349	22.2114	27.2421	19.13	13.3072	23.453	17.6765	9.7599	15.8911
Solyc08g065510.1	0	0	0	0	0	0	0	0	0	0	0	0	0	0	0	0	0	0
Solyc12g005520.1	0.1227	0.9558	1.0003	0.2132	0.2399	0.0317	0	0.0506	0	0.741	0.3849	0.66	0	0.1485	0.2559	0.0083	0.0748	0.2306
Solyc12g036650.2	9.2145	5.8505	5.2776	4.0281	7.1664	4.6203	3.4131	5.8343	4.4488	6.4559	6.3377	8.8482	2.1795	1.8489	1.5056	1.5026	2.4349	3.0092
Solyc08g029360.4	0.5629	0.8954	2.1581	6.2912	7.3978	9.5821	1.7249	1.7434	1.9652	0.8549	0.7524	0.4882	5.9291	6.4355	7.1444	1.1367	0.9529	1.0525
Solyc02g022890.3	2.6502	2.3288	2.1488	15.5714	9.9627	10.7118	7.7264	5.666	4.3603	5.5035	5.9085	5.7944	11.6789	6.9413	11.9014	8.575	4.7764	7.2443
Solyc07g065120.3	40.756	58.1277	54.222	44.9245	33.8004	42.9989	30.7657	22.5292	26.2403	46.6372	75.7821	72.4583	49.3555	52.313	52.442	33.1719	42.5153	39.3374
Solyc08g029190.3	11.7588	13.4758	13.8891	11.7275	12.2176	12.0441	9.1025	8.9573	7.9772	10.7953	10.068	10.8517	8.0397	8.0619	8.9869	6.9466	7.0522	5.3116
Solyc03g078700.2	0	0	0.226	0.1784	0.138	0.2543	0.2395	0	0.1303	0	0	0	0.7785	0.1359	0.5076	0.3932	0	0.1506
Solyc11g065060.1	0	0	0	0	0	0	0	0	0	0	0	0	0	0	0	0	0	0
Solyc00g019730.1	1.817	2.4141	3.69	5.125	4.861	4.7158	2.8103	1.488	3.6411	1.2417	3.5441	2.2798	1.7551	7.1641	2.4473	2.4809	3.6437	3.6289
Solyc09g010970.4	26.2424	21.252	21.0383	29.8343	25.173	29.4592	30.7268	25.9244	24.9642	22.1545	26.0447	24.7709	23.2703	30.4454	32.2946	22.4723	25.1087	27.4575
Solyc10g081890.2	0	0	0	0	0	0	0	0.0897	0	0	0	0	0	0	0	0	0	0
Solyc09g075220.1	9.4736	12.7091	11.8965	13.0562	16.4589	18.2677	10.94	6.9515	10.5327	7.9438	8.6525	10.2589	10.9445	12.2998	10.3208	6.8008	5.8359	5.9449
Solyc07g014650.3	33.6155	30.6034	25.6984	33.7657	41.4459	36.6127	28.1236	32.3618	28.2272	21.2601	22.2608	22.4706	21.3964	20.4362	17.9161	19.8566	22.4403	20.7988
Solyc04g072590.3	0	0.0768	0	0.1293	0.1022	0.2019	0	0	0.0708	0.0467	0	0.1002	0.1481	0.1564	0.1417	0.0713	0.1401	0.103
Solyc02g086910.4	91.0308	91.8676	82.0366	90.4786	57.0438	59.9175	100.16	82.0809	64.9348	87.5283	104.916	93.6663	71.0225	70.6871	85.6733	68.882	63.4988	80.9601
Solyc09g092450.3	10.1523	10.453	10.4374	20.6534	20.7987	20.4695	9.7822	10.2369	10.4638	14.2607	14.5209	15.4044	21.6263	22.0051	19.0752	13.3008	14.001	15.1679
Solyc07g005630.3	0	0	0	0	0	0	0	0	0	0	0	0	0	0	0	0	0	0
Solyc02g071620.3	126.448	226.34	165.374	80.8471	90.1232	77.1853	22.242	34.1667	27.322	88.532	150.147	96.9806	34.9578	56.9104	70.9822	12.7074	15.8025	16.4972
Solyc01g103220.3	53.7743	57.7143	60.4156	46.9136	44.4906	55.0293	53.8303	43.6192	46.3697	120.9	93.993	126.735	82.873	86.7128	105.513	83.363	91.0946	98.6194
Solyc09g042725.1	0	0	0	0	0	0	0	0	0	0	0	0	0	0	0	0	0	0
Solyc10g076750.2	3.013	2.9827	2.7019	4.9515	4.7727	5.6031	2.9572	3.2079	3.9687	2.8136	2.1793	1.8774	7.0173	6.2137	7.0137	3.1639	3.1318	2.6681
Solyc03g112490.1	0	0	0	0	0	0	0	0	0	0	0	0	0	0	0	0	0	0
Solyc10g085490.3	9.8731	9.294	10.0502	13.8633	19.1713	18.3866	11.0566	11.5523	9.7645	5.2822	7.0018	6.5327	8.9768	7.8458	6.0808	7.2985	6.0623	6.851
Solyc11g073180.2	0.0826	0	0.2312	0	0	0	0	0	0	0.0449	0	0	0	0	0.0712	0	0.1737	0
Solyc01g098570.2	18.262	6.4263	8.9489	5.421	5.8923	3.2938	13.8134	17.002	18.5562	18.4072	23.1456	23.3377	8.0113	9.2213	9.1419	13.0802	15.2397	15.0456
Solyc03g031710.3	0	0	0	0	0	0	0	0	0	0	0	0	0	0	0	0	0	0
Solyc12g040815.1	0	0	0	0	0	0	0	0	0	0	0	0	0	0	0	0	0	0
Solyc07g005170.3	0.0834	0.0778	0.1394	0.3283	0.5185	0.563	0.0945	0.1963	0.0612	0.023	0.144	0.1203	0.4079	0.1233	0.587	0.0606	0.1212	0.0679
Solyc12g013660.3	0	0	0	0	0	0	0	0	0	0	0	0.0205	0	0	0	0	0	0
Solyc09g014450.4	5.8785	10.1586	7.7407	11.9397	20.7255	22.7115	4.9021	8.5071	8.0599	2.6895	2.3353	2.9744	6.054	4.8485	2.6461	2.2912	1.9003	1.8212
Solyc05g008730.1	0	0	0	0	0	0	0	0	0	0	0	0	0	0	0	0	0	0
Solyc02g070710.3	0.5583	0.8236	0.5592	1.677	2.0408	2.8201	0.7082	0.6212	0.6794	0.3832	0.4852	0.5586	1.3358	1.124	1.6429	0.6547	0.5259	0.7042
Solyc01g087940.3	0.02	0.0731	0	0.2926	0.1273	0.1784	0.1234	0	0.0255	0.0821	0.0898	0	0.4547	0.4553	0.4688	0.1262	0.252	0.3104
Solyc08g075840.3	9.8833	9.9649	10.582	12.5722	14.1144	13.2205	12.1879	11.4445	10.6343	8.755	6.9913	8.4554	8.8414	8.3698	7.8343	8.8267	8.4563	7.4304
Solyc04g052990.1	0.5252	0.8133	1.1204	0.1273	0.3044	0.762	0.6445	0.2046	0.3606	0.5014	1.7561	2.1033	0	0.3442	0.1183	0.2881	0.4011	0.8471
Solyc08g075190.1	1.0395	0.5095	1.957	1.2817	1.2057	1.2934	0.6078	0.7658	0.6128	1.014	0.7364	0.7193	1.5411	0.5604	0.9762	1.7233	3.2134	0.8542
Solyc03g005020.3	0.311	0.3527	0.5764	4.3647	2.6699	2.51	0.4195	0.2471	0.4284	0.9098	0.8223	1.3469	3.2994	6.6966	3.8761	0.3856	0.8151	0.9519
Solyc07g018325.1	0	0	0	0	0	0	0	0	0	0	0	0	0	0	0	0	0	0
Solyc01g108810.3	0.1801	0.0429	0	0	0.109	0.1155	0	0	0	0	0.0374	0.0484	0	0	0.1719	0	0	0
Solyc04g054520.3	79.4236	68.4493	73.4618	72.3696	58.3947	54.6695	85.4619	78.4988	76.8415	163.097	170.368	178.638	119.847	120.67	149.564	125.621	128.533	148.952
Solyc08g075850.3	12.8673	10.8165	10.6105	18.1149	26.4083	25.9	10.2221	10.1224	10.9434	15.3697	12.933	17.0176	20.6671	18.3674	17.5737	12.1585	13.9411	11.7359
Solyc11g030590.1	0	0	0	0	0	0	0	0	0	0	0	0	0	0	0	0	0	0
Solyc01g110555.1	6.808	3.2431	5.5788	4.6997	5.6816	3.6466	4.3816	4.3638	4.6056	2.8018	4.1455	2.7897	1.8553	1.6204	3.4191	4.3477	2.6868	3.9216
Solyc04g057870.3	51.5224	51.8573	58.1851	74.5573	66.0952	67.7325	54.4633	55.877	59.9365	79.749	63.6085	78.4963	76.1942	69.0394	72.4168	66.5712	62.1204	62.9211
Solyc04g074360.3	0	0.0265	0	0.0209	0	0.0211	0	0.012	0	0.0354	0	0	0	0	0	0	0	0
Solyc12g006000.1	2.5431	2.8928	3.0464	0.2781	0.3496	0.1029	2.2349	2.71	2.833	2.2306	2.9168	1.4018	1.0219	0.9923	0.8202	1.9978	1.8832	1.7117
Solyc06g007170.4	5.24	5.3647	6.3929	17.4396	14.0467	11.6695	13.1224	8.746	9.9325	7.7636	10.6115	12.9535	33.1782	35.6774	42.6318	17.6526	16.7427	20.0043
Solyc02g031960.3	0	0	0	0	0	0	0	0	0	0	0	0	0	0	0	0	0	0
Solyc09g098540.3	221.869	176.963	180.882	431.044	293.679	334.251	258.477	188.436	212.323	209.602	260.444	251.175	415.785	424.805	372.141	363.187	374.84	341.891
Solyc05g023630.1	0	0	0	0	0	0	0	0	0	0	0	0	0	0	0	0	0	0
Solyc03g115140.4	9.8674	12.5848	13.3125	12.3276	14.712	13.3917	10.6638	9.4455	8.1886	9.684	9.6658	10.4323	9.5867	10.0073	9.5625	9.2043	8.5474	8.1499
Solyc07g006770.2	1.5523	6.2567	5.2904	3.972	5.4103	4.3812	0.1672	0.7421	0.1745	4.948	5.3648	3.8489	0.5325	0.4083	0.2741	0.2273	0.0878	0.123
Solyc11g018710.1	0.7268	0.1807	0.4683	1.0043	1.7175	0.9488	0.2825	0.9013	0.8908	0.2814	0.0286	0.3864	3.3001	2.6258	2.8972	1.2659	0.4015	0.5937
Solyc08g066220.4	0.0814	0	0	0.3299	0.4131	0	0.3115	0.4561	0.2032	0.1324	0.3001	0	0.1555	0.0646	0.2713	0.0313	0.3821	0.1987
Solyc03g094040.4	1.9354	1.8123	1.761	4.3538	6.6139	6.2522	2.1016	2.4981	3.0718	1.0405	1.4654	2.0359	2.7258	2.5115	3.3708	1.587	1.2919	1.3989
Solyc04g039625.1	0	0	0	0	0	0	0	0	0	0	0	0	0	0	0	0	0	0
Solyc01g081000.3	0.4669	0.2628	0.4321	0.4754	0.4269	0.5372	0.4544	0.3178	0.076	0.3531	0.0801	0.3234	0.3825	0.4425	0.6494	0.2143	0.1027	0.2232
Solyc01g103790.3	0.5588	0.9792	0.5141	1.4878	1.0753	1.4426	1.1289	1.4004	0.6962	0.4188	0.9467	0.4963	0.9265	0.7447	1.5642	1.1215	1.1082	1.3588
Solyc09g050065.1	0	0	0	0	0	0	0	0	0	0	0	0	0	0	0	0	0	0
Solyc07g053670.3	5.3329	4.5436	5.4496	8.0514	7.6911	7.3532	4.6196	4.2978	4.6392	6.0064	6.486	7.9979	6.9423	8.3839	7.313	4.9519	6.1717	5.1191
Solyc08g066230.2	0	0	0	0	0	0	0	0	0	0	0	0	0	0	0	0	0	0
Solyc04g150158.1	46.175	48.1747	55.9233	72.2626	78.4376	71.8592	65.8055	55.3601	61.7328	89.9503	78.4944	114.546	72.1349	79.8727	91.2294	79.4076	77.944	83.6665
Solyc08g065163.1	0	0	0	0	0	0	0	0	0	0	0	0	0	0	0	0	0	0
Solyc01g095210.3	10.1307	9.6158	10.2039	17.8494	16.0797	16.4181	10.6816	10.2796	9.9273	7.9453	8.8297	8.7064	13.4097	12.5129	12.4485	8.7586	10.291	9.2201
Solyc01g109430.3	1.0981	0.7775	1.277	5.8398	2.2357	2.4779	4.1737	2.6681	2.4256	1.1164	2.0299	1.7714	3.3083	4.2956	4.769	2.1455	3.2048	2.9354
Solyc10g006730.1	2.4052	2.4904	2.642	5.1361	4.8043	4.349	3.1654	3.0742	3.3429	2.0148	2.634	1.7878	3.8067	4.8931	4.6712	2.381	3.114	2.6763
Solyc06g064670.3	0	0	0	0	0	0	0	0	0	0	0	0	0	0	0	0	0	0
Solyc04g015090.3	1.4591	0.4076	0.8322	1.7766	1.5259	1.4685	1.9604	1.781	1.7093	0.7912	0.6872	0.323	1.2057	1.8186	1.0715	0.888	1.2876	1.26
Solyc07g006830.4	40.9747	48.2454	50.9595	52.2422	55.6975	54.5608	40.9999	44.426	44.4146	41.9865	38.4956	39.4838	34.4713	33.4625	28.3418	26.4095	26.8	23.3524
Solyc06g062640.1	0	0	0	0.1997	0	0	0	0.2807	0	0	0	0	0	0	0	0	0	0
Solyc01g091530.4	71.3612	53.4976	46.7689	125.067	53.5717	63.6332	188.082	96.1432	100.594	57.1698	100.965	94.8522	98.1376	123.318	109.296	113.109	162.549	150.453
Solyc11g070100.2	15.1149	15.0455	16.5308	18.564	18.2593	18.3105	17.6484	14.8623	17.0517	13.9541	15.3475	13.6989	13.2811	16.9052	15.3764	11.8251	11.5939	11.2809
Solyc05g010710.3	1.1277	1.7107	1.6078	2.8638	2.6438	1.8286	2.7287	2.3992	2.8826	0.9937	1.0455	0.7332	1.5894	1.2113	1.2995	0.679	1.0062	0.6505
Solyc03g117470.3	6.9978	6.6285	5.947	14.5098	15.276	16.1738	6.5232	8.0124	8.5742	5.7767	6.0057	6.9793	13.1629	11.593	11.6704	8.5175	8.626	5.7017
Solyc05g025680.3	0	0	0	0	0	0	0	0	0	0	0	0	0	0	0	0.0091	0	0
Solyc01g005320.2	0.1416	0	0.0312	0.0279	0	0	0	0.0561	0.1018	0	0	0.0784	0	0.0341	0.1135	0.1119	0.1226	0.1753
Solyc06g076350.3	1.2129	0.8304	0.9044	33.7616	38.3057	33.9997	1.0468	1.1374	0.7926	2.2965	1.3818	1.6827	13.8935	12.9875	8.7081	0.6499	0.4262	0.7766
Solyc06g073390.3	8.4369	9.0585	7.4262	9.9972	11.6721	13.0743	11.3071	10.4739	10.2372	7.6553	6.9521	7.5719	13.7095	14.1802	13.6214	11.1771	9.7992	10.2482
Solyc10g039250.2	0	0	0	0	0	0	0	0	0	0	0.0296	0	0	0	0	0	0	0
Solyc10g007410.4	19.3175	19.6857	23.3125	25.7751	26.2332	28.7823	22.5601	23.8183	22.2199	16.6223	17.7988	13.4445	17.2571	16.8357	17.2989	18.4064	14.7508	15.1171
Solyc12g038420.2	9.3312	8.9929	11.6708	4.2931	4.6007	4.401	4.6262	3.3755	3.9343	3.4151	3.3258	2.3338	2.6767	1.1989	2.1262	3.7329	2.7378	3.0395
Solyc02g088290.4	6.2227	6.149	7.5755	7.8765	8.9842	8.3683	5.842	8.0382	5.9544	8.1569	7.7399	6.3354	10.7773	8.1934	7.7016	7.8589	7.0665	6.5419
Solyc04g078160.4	2.0328	1.7153	1.8126	5.7375	6.553	6.3909	3.463	2.5199	2.6593	1.9343	1.6795	2.2608	4.3449	5.2599	4.1529	2.9544	2.7172	2.8624
Solyc08g077700.3	0.121	0.098	0.0169	0.1036	0.0552	0.0309	0.1192	0.0786	0.0905	0.1373	0.0669	0.2679	0	0.0112	0.1001	0.0425	0.0562	0.187
Solyc04g049407.1	4.0802	4.1894	2.5786	5.6894	5.3224	6.5152	6.1069	4.9596	3.9086	3.6389	2.0381	3.7201	4.4577	5.7091	4.2153	4.2554	3.0754	3.3148
Solyc07g009290.3	0	0	0	0	0	0	0	0	0	0	0	0	0	0	0	0	0	0
Solyc07g019520.1	0	0	0	0	0	0	0	0	0	0	0	0	0	0	0	0	0	0
Solyc05g026210.2	0	0	0	0	0	0	0	0	0	0	0	0	0	0	0	0	0	0
Solyc11g040300.2	15.2921	15.5693	12.5744	23.762	25.3279	20.1192	16.2484	15.5167	19.9468	11.6651	10.6679	14.0026	10.8734	13.8549	8.7774	9.115	6.9449	7.8116
Solyc02g078460.3	13.8185	10.4686	11.26	31.2632	32.1267	27.272	14.2656	15.5295	13.9765	7.1814	7.2482	7.1974	15.1155	16.6491	14.0774	9.2297	8.6312	10.2849
Solyc03g121760.3	0.0842	0.1248	0.5178	0.6869	0.1729	0.341	0.8589	0.1979	0.3157	0.6215	0.7684	1.1492	1.2783	1.2919	1.3085	0.4723	0.7703	0.7394
Solyc01g108160.3	4.5801	5.24	4.871	6.779	8.9664	8.1376	4.7267	4.3661	5.2634	2.7695	3.0419	2.7459	5.0199	4.802	4.7715	3.6109	3.2769	2.7717
Solyc02g065430.1	3.4959	1.6296	2.093	2.2341	1.163	1.9991	1.6561	0.6174	0.5849	0.691	1.2029	1.53	2.6067	3.9056	1.9577	1.5278	1.1419	1.1913
Solyc06g083500.4	0	0.2805	0.072	0.1933	0.3528	0.2514	0.2472	0.2059	0.0997	0.3931	0.1875	0.2509	0.3738	0.3832	0.575	0.1932	0.1267	0.1968
Solyc12g042340.2	0	0	0	0	0	0	0.0733	0	0	0	0	0	0.0385	0	0	0	0	0
Solyc02g014600.1	0	0	0	0	0	0	0	0	0	0	0	0	0	0	0	0	0	0
Solyc03g093190.1	0.0933	0	0	0	0	0	0.1623	0	0	0	0.0346	0	0	0	0	0	0	0
Solyc12g009450.3	0.6619	2.8149	2.6859	1.4097	1.7295	1.2911	0.6313	0.4474	0.3816	0.8636	0.8561	0.9605	0.3329	0.564	0.3988	0.0728	0.108	0.1039
Solyc05g055343.2	0.2361	0.0884	0.3462	0.1152	0.1647	0.2336	0.5757	0.3454	0.5313	0.1453	0.1342	0.2284	0.7021	0.3208	1.0137	1.9278	1.5332	1.726
Solyc01g100460.3	1.4628	2.594	3.1028	3.387	6.254	6.8922	2.398	3.6042	2.168	0.8745	0.7475	0.6134	2.0869	1.6931	1.7575	2.0699	1.3078	1.0412
Solyc12g088970.1	0	0	0	0	0	0	0	0	0	0	0	0	0	0	0	0	0	0
Solanum_lycopersicum_newGene_2263	0	0	0	0.1057	0.1686	0.122	0	0	0	0	0	0	0.0843	0.3402	0	0	0.0369	0
Solyc05g007640.3	0.0623	0.1174	0.1221	0.2668	0.5808	1.0145	0.1372	0.1312	0.1174	0.2006	0.0528	0.0664	0.3117	0.2966	0.4964	0.0396	0.076	0.0447
Solyc03g115985.1	0	3.1365	0	3.7552	0	4.0928	4.5411	4.9351	0	11.1838	6.0357	12.2466	14.9203	0	11.0504	14.4147	13.8639	13.6326
Solyc01g110660.4	3.0426	2.9398	4.9162	1.3783	0.8479	1.3316	5.454	3.64	3.7174	3.3402	6.2497	6.2087	1.1891	1.0173	0.6735	1.257	3.0093	1.5999
Solanum_lycopersicum_newGene_2261	17.3571	23.2557	24.3684	21.8878	23.8593	20.8611	22.037	23.7393	24.9001	18.9745	19.0083	19.3004	21.6431	20.5553	18.1348	22.7022	26.5395	22.7203
Solyc09g083270.4	10.7452	14.3264	12.2501	12.4283	12.8516	11.2919	12.5701	15.5875	13.7329	13.2197	13.6381	14.4048	10.4356	9.6343	10.6521	10.5355	9.2576	10.0958
Solanum_lycopersicum_newGene_2260	0	0	0	0	0	0.0853	0.1249	0.1794	0	0	0	0	0.0525	0	0	0	0	0
Solyc07g054130.2	1.2411	1.8049	2.713	0.9877	0.4305	0.9564	2.0352	1.3666	1.9401	1.793	2.5295	2.1489	1.3598	0.5587	1.8766	1.9995	1.3804	1.9932
Solyc05g025955.1	0	0	0.0101	0.0093	0	0	0.0105	0	0	0	0	0.0104	0	0	0	0	0	0
Solyc06g074380.3	6.391	8.0299	7.7068	10.3835	9.8013	10.0022	8.7423	7.0345	7.5017	6.8789	5.7296	6.5365	9.5546	9.4887	8.6723	7.3776	8.0123	7.77
Solyc05g050460.1	0	0	0	0	0	0	0	0	0	0	0	0	0	0	0	0	0	0
Solyc10g085890.1	6.774	4.1266	8.3824	3.1839	7.14	13.9218	3.9089	10.4329	13.1732	9.351	3.594	5.0164	5.4767	2.7032	2.274	9.2686	6.7733	3.4534
Solyc01g016770.1	0.1305	0	0	0.3005	0.2147	0.601	0.1594	0.3793	0	0	0.0947	0.7697	1.3148	0.6991	1.1702	0.3092	0.6788	0.4673
Solyc08g074682.1	0.1162	1.1869	0.9248	0.2783	0.4751	0.7603	0.1876	0.127	0.5747	1.1244	0.3138	0.21	0.4996	0.0802	0	0.0143	0.0261	0.0209
Solyc05g005980.4	6.3219	4.0517	5.8388	32.3573	21.8357	23.936	42.0858	33.6086	44.0626	8.2379	5.8826	7.0932	86.6206	65.7015	75.7692	74.4499	67.4723	63.3553
Solyc12g015760.1	0	0	0	0	0	0	0	0	0	0	0	0	0	0	0	0	0	0
Solyc05g055370.1	0	0	0	0	0	0	0	0	0	0	0	0	0	0	0	0	0	0
Solyc06g008040.3	10.6271	7.9862	8.6675	26.7305	27.6793	24.2734	13.8167	11.1984	12.8762	6.6737	8.4553	7.8277	15.3519	15.9199	13.6386	9.1096	9.9727	9.2041
Solyc07g041160.3	11.045	15.652	12.6003	16.2302	20.5565	22.2756	8.332	10.5132	10.2599	13.536	14.2761	15.3855	15.79	16.5702	16.6197	9.2254	10.1794	8.684
Solyc06g074260.4	9.8846	10.4935	7.9579	7.7746	5.7065	7.1055	19.2934	18.1678	14.8577	8.9386	9.7373	7.04	10.974	12.4806	9.2933	11.6448	16.4738	14.2377
Solyc11g008260.2	4.068	3.7093	3.7165	4.314	6.1172	6.9755	3.3333	4.0455	5.8886	2.5048	2.7079	3.1973	3.3503	5.4761	4.4449	4.0425	3.1247	4.3814
Solyc12g009390.2	1.8922	2.3511	2.7418	3.4975	3.3018	3.6009	3.414	3.5952	2.5149	4.387	3.2283	4.8072	3.7238	4.9152	4.9357	3.7989	3.7685	3.8296
Solyc08g045760.1	0	0	0	0	0	0	0	0	0	0	0	0	0	0	0	0	0	0
Solyc01g080910.2	2.9967	3.4861	4.2354	49.1349	38.5588	37.1787	17.9836	21.2634	30.4717	4.3166	3.3843	3.2779	97.6207	94.7062	78.1203	41.0651	42.8385	31.2301
Solyc07g042220.2	0	0	0	0	0	0	0	0	0	0	0	0	0	0	0	0	0	0
Solyc02g079600.3	0.8781	2.3758	3.7271	1.6587	1.6069	1.4533	0.519	0.68	0.6636	1.8971	2.3126	2.9828	0.309	0.3842	0.3137	0.2563	0.2929	0.197
Solyc04g011335.1	0	0	0	0	0	0	0	0	0	0	0	0	0	0	0	0	0	0
Solyc10g083330.1	2.7076	7.7139	4.5778	3.3561	6.4948	7.5247	2.3096	2.5547	2.2532	1.9876	2.2905	2.5789	3.1658	4.2954	3.5781	2.0072	2.0994	1.4819
Solyc04g064500.4	46.6507	48.0857	50.5155	51.0248	52.0518	54.09	43.7712	41.4414	42.4791	51.8972	50.3091	48.9546	43.5121	45.5244	38.6135	39.8349	37.0105	40.533
Solyc06g048570.3	13.0525	8.9341	9.8615	5.6044	6.0021	6.2953	9.7624	9.7126	7.443	9.2687	14.5672	16.4756	5.6594	4.7631	5.0478	7.8692	9.0148	11.7984
Solyc05g014480.4	0.5789	0.6972	0.4128	2.572	1.3486	2.2394	1.1705	0.6327	1.3137	0.4512	0.631	0.6102	1.2645	1.5358	1.9505	0.4429	1.1481	1.1621
Solyc08g079810.4	8.5243	9.5425	9.2651	12.282	11.6462	12.8843	9.9378	9.5629	9.6281	6.0785	6.0045	5.1462	7.3283	6.4247	7.2082	6.5762	5.5694	5.1787
Solyc12g008450.2	1.8901	1.8144	2.1058	3.5112	4.4806	5.4262	2.7508	3.1115	3.2712	1.498	1.0731	0.9758	3.305	2.1834	2.4039	1.634	1.9275	1.229
Solyc03g095290.3	4.0361	3.9737	3.9072	12.0705	12.396	12.2293	5.0233	5.1788	4.9465	4.4553	4.4017	4.6411	9.8837	9.8758	9.5122	4.2566	4.2861	4.264
Solyc08g014000.3	0.4567	0.2516	2.1409	3.8872	1.4215	2.6742	3.2897	0.6232	4.5916	1.8958	0.9487	1.341	6.9627	13.7353	4.8733	15.1083	8.8265	12.0219
Solanum_lycopersicum_newGene_1820	0.9281	1.0889	0.6766	0.4017	0.8515	0.6966	0.2652	0.6392	1.0006	0.5861	0.9744	0.6744	0.7181	0.4689	0.4894	0.6202	0.3386	0.1887
Solanum_lycopersicum_newGene_1821	1.0225	0.5049	0.1877	0.1328	0.1227	0.223	0.2712	0.3596	0.2109	0.1613	0.3933	0.2365	0	0.0403	0.0691	0.1006	0.1164	0
Solyc10g006410.3	5.7922	4.8801	4.9958	9.1666	9.5498	9.1859	6.8053	7.5243	7.161	5.8116	5.5358	5.2547	10.2625	11.5751	11.7816	6.6706	5.5822	4.8504
Solanum_lycopersicum_newGene_1825	0	0	0	0	0	0	0	0	0	0	0	0	0	0	0	0	0	0
Solyc10g080060.1	0	0	0	0	0	0	0	0	0	0	0.0236	0.0285	0	0	0	0	0	0
Solyc03g083870.4	0	0	0	0	0	0	0	0	0	0	0	0	0	0	0	0	0	0
Solyc06g069480.3	5.9483	7.0008	6.5949	10.8315	13.9861	14.7016	4.9601	5.6805	7.074	5.7123	4.4186	4.3219	8.1115	7.6801	7.8111	5.5452	5.1661	4.553
Solyc12g010330.2	8.7447	10.7467	8.4811	10.9977	13.1245	13.8409	10.3934	11.4782	12.067	6.8535	7.555	7.7154	7.9932	8.5229	6.6854	7.784	7.5714	7.1288
Solyc12g087820.1	10.8606	9.2808	9.3185	15.3067	17.4288	13.6088	8.4539	9.2218	10.4985	10.2928	9.637	10.2474	11.648	8.1126	8.9447	9.7831	10.7664	11.6907
Solyc02g080610.4	0.735	0.2133	0.8397	1.9638	0.4203	0.7823	1.963	1.0229	0.9116	0.6462	1.4173	1.5006	3.0429	3.4861	3.759	2.4491	2.932	2.4229
Solyc01g150113.1	0	0	0	0	0	0	0	0	0	0	0	0	0	0	0	0	0	0
Solyc07g019640.1	0	0	0	0	0	0	0	0	0	0	0	0	0	0	0	0	0	0
Solyc03g025220.3	0.4945	0.2191	0.1149	0.6644	0.6383	1.1632	0.3796	0.4442	0.6887	0.1988	0.4106	0.3199	1.116	1.1499	1.0032	0.4435	0.6447	0.3476
Solyc01g014160.1	0	0	0	0	0	0	0	0	0	0	0	0	0	0	0	0	0	0
Solyc01g017320.1	0	0	0	0	0	0	0	0	0	0	0	0	0	0	0	0	0	0
Solyc10g078960.2	309.669	361.048	317.842	465.886	483.213	391.825	441.043	422.31	362.121	282.047	291.718	347.319	255.516	302.823	327.511	249.039	264.601	295.182
Solyc11g005870.2	3.0201	3.3249	3.2714	6.3934	5.6536	4.94	4.5209	4.6696	4.785	3.1166	3.1753	3.6288	3.4743	4.0259	4.9084	3.4394	3.5794	1.9593
Solyc01g150121.1	0	0	0	0	0	0	0	0	0	0	0	0	0	0	0	0	0	0
Solyc10g078330.2	0.1957	0	0.2805	0.3971	0.123	0.1926	0.7898	0.033	0.0729	0.6286	0.3163	1.2555	2.066	1.9152	2.5793	0.4994	0.9955	0.8466
Solyc10g049585.1	0	0	0	0	0	0	0	0	0	0.0102	0	0.0245	0.0231	0	0	0	0	0
Solyc07g042235.1	0	0	0	0	0	0	0	0	0	0	0	0	0	0	0	0	0	0
Solyc01g056990.3	0	0.0582	0	0.3189	0.0884	0.1113	0.2114	0.1062	0	0.2018	0.2577	0.4531	0.162	0.3518	0.976	0.0966	0.2554	0.5551
Solyc01g079330.3	9.6219	10.2734	9.7345	10.7083	12.1973	11.3007	8.6016	9.2708	10.1862	8.8241	8.5452	7.8246	10.4327	8.6758	8.5951	7.5983	7.3545	6.7964
Solyc02g060600.1	0	0	0	0	0	0	0	0	0	0	0	0	0	0	0	0	0	0
Solyc12g098370.2	9.9138	7.4831	10.5972	34.391	29.2729	28.3121	26.3711	23.8982	23.4121	7.1501	10.0636	9.5364	33.7963	36.3044	32.6724	18.9639	25.8812	20.8459
Solyc05g007120.4	17.1698	21.7432	16.8081	31.0465	24.9122	24.4411	21.1915	14.3913	15.9773	10.2227	18.922	15.9173	24.284	25.9569	25.9624	21.6139	22.3144	25.3969
Solyc03g114910.4	0.1315	0.0341	0	0.0406	0.0194	0.0837	0.061	0	0	0.1012	0.2044	0.2357	0.2714	0.272	0.189	0.0944	0.1238	0.1069
Solyc09g072660.4	2.7571	0.8566	1.0204	1.2066	1.2654	2.3683	0.8767	1.1913	1.0486	0.9134	2.0169	1.0081	4.4434	4.7095	5.7539	1.799	2.0345	3.1353
Solyc10g007077.1	0	0	0	0	0	0	0	0	0.0855	0	0	0	0	0	0	0	0	0
Solyc12g044450.2	1.9415	2.1107	1.5841	3.4782	3.1452	2.7254	3.521	3.6261	2.6026	4.018	6.7578	5.2586	3.4087	3.2223	3.8546	4.1921	2.6413	3.5478
Solyc07g008475.1	0.7703	0.4318	0.5155	1.4389	2.3715	2.4016	1.1601	0.5627	1.0458	0.4352	0.7212	0.8352	1.4583	1.7484	1.3799	0.9112	0.742	0.6954
Solyc07g009160.3	11.4745	10.5649	17.016	24.5736	30.0646	28.1979	14.7621	16.6013	15.5058	15.9296	12.1723	16.9043	21.6164	21.4889	23.764	15.3656	13.7519	13.8555
Solyc06g084130.3	1.4246	0.4418	1.9005	0.1355	0.1139	0.2691	0.308	0.9176	0.4385	1.2735	1.7961	2.3451	0.3389	0.416	0.6731	1.3618	0.7325	1.8839
Solyc12g021310.3	9.1325	11.027	11.5957	10.7943	12.9111	14.255	7.0152	7.261	7.779	7.0009	6.8576	5.1107	9.5645	8.0178	8.6753	6.8549	6.729	5.8616
Solyc12g099280.2	0.6249	1.0178	0.6833	2.8203	3.4669	3.7092	0.5572	0.4172	0.6225	0.7794	1.0219	1.3778	1.56	2.1086	1.7611	0.4863	0.8632	0.8032
Solyc07g032080.3	0	0	0	0	0.0331	0.0128	0	0	0	0	0	0.0483	0	0.0801	0.0418	0.0837	0.1426	0.0911
Solyc03g098330.2	6.5302	5.3233	5.0362	3.5515	4.7104	3.6419	8.0383	9.1508	9.7346	3.6329	4.3095	2.4946	2.5453	2.38	2.2848	3.9441	4.4736	3.237
Solyc02g062725.1	0	0	0	0	0	0	0.0247	0	0	0	0	0	0	0	0	0	0	0
Solyc05g006340.3	4.9975	5.1152	4.1974	34.3485	37.0365	36.8711	4.2466	3.3625	3.9766	3.3074	3.5317	3.1732	17.6224	17.6168	14.1802	2.6345	2.2934	2.5383
Solyc05g048740.3	0.3183	0.1025	0.0899	0.197	0.2421	0.1069	0	0	0	0.0367	0	0	0.0452	0	0	0	0	0
Solyc08g079160.3	0.0725	0	0.0251	0	0	0	0.0785	0	0	0	0	0	0	0	0	0.034	0	0
Solyc04g054150.2	0.3755	0.1417	0.0416	0.1886	0.2263	0.4759	0.56	0.118	0.2891	0.0348	0.0931	0	0.3761	0	0.2049	0.1188	0.2512	0.4424
Solyc10g005080.3	402.383	431.985	434.508	0.3694	0.4863	0.6218	422.436	334.67	343.383	389.498	398.417	334.376	0.8664	0.3001	0.5996	255.396	229.897	237.943
Solyc03g120390.3	4.3629	4.4907	6.0131	15.1032	17.899	15.1405	8.0282	10.5824	10.9186	7.4	8.968	5.619	10.9709	12.0779	10.8601	6.0113	4.741	5.9567
Solyc02g092390.3	6.4662	2.4436	5.0507	5.8954	8.3094	8.2082	3.9119	6.1539	3.8333	6.6371	5.2464	4.5302	9.135	4.2895	4.3085	5.9693	4.5538	4.0721
Solyc11g065555.1	0	0	0	0	0	0	0	0	0	0	0	0	0	0	0	0	0	0
Solyc10g039197.2	0	0	0	0	0	0	0	0	0	0	0	0	0	0	0	0	0	0
Solyc10g055360.1	0	0	0	0	0	0	0	0	0	0	0	0	0	0	0	0	0	0
Solyc09g089860.4	2.1741	2.4072	1.9425	3.4048	3.5942	3.4437	1.3009	2.3578	1.749	3.3879	3.3054	4.6937	3.5842	3.5299	3.5827	2.2365	0.9327	1.9714
Solyc08g062437.1	34.6428	12.6682	7.4189	0.1201	0.0797	0.0525	3.9316	2.2736	3.4294	23.7976	18.0802	47.2427	0.1668	0.0391	0.062	11.8017	7.5348	21.2315
Solyc07g065870.3	3.8066	3.8694	3.2701	9.5244	8.126	5.9688	6.6928	6.7772	6.2795	4.996	3.5078	4.788	8.3614	8.5805	9.2706	5.9623	5.5917	6.805
Solyc07g049470.4	2.6145	1.201	1.2741	3.3957	3.5159	3.2235	3.1183	2.6619	3.3145	1.7767	1.5836	1.8679	2.5831	3.5112	2.5756	1.7795	1.7885	2.4749
Solyc05g150130.1	2.5643	2.0076	2.1014	3.1991	2.7449	3.54	1.2448	0.1903	1.4219	1.6576	1.4323	1.2132	1.8054	1.6547	1.9395	0.8826	1.2806	0.8541
Solyc11g065180.2	20.4662	17.9921	25.8927	19.3025	29.9163	29.7643	15.435	16.6425	19.8103	11.5035	11.3425	12.1941	14.9456	14.4479	12.3152	12.8588	11.8775	14.5807
Solyc01g044270.3	4.6339	5.9833	4.2668	6.777	6.0477	6.2426	6.0099	4.3595	3.8674	3.9127	3.5904	3.8742	6.1026	6.3732	6.717	4.5143	4.2634	5.067
Solanum_lycopersicum_newGene_468	0	0	0.145	0.0462	0	0.0754	0	0.1295	0	0	0	0	0.0986	0	0	0	0	0
Solanum_lycopersicum_newGene_469	0.1097	0	0	0.12	0.0941	0.2395	0	0.2603	0.2614	0.1257	0.1723	0	0.1274	0.243	0.2585	0.1006	0	0
Solanum_lycopersicum_newGene_465	0	0	0	0	0	0	0	0.2712	0	0	0	0	0	0	0	0	0	0
Solyc02g067120.4	89.2977	85.1614	68.9726	26.4935	19.2207	20.9879	73.1969	60.7995	63.8579	102.816	119.769	79.8695	18.1192	15.2446	19.0769	38.0064	30.3833	32.1023
Solanum_lycopersicum_newGene_461	0	0	0	0	0	0.0943	0	0	0	0	0.2757	0.4458	0	0.2032	0	0	0	0
Solyc01g081340.4	0.3957	0.3484	0.1776	0.8796	1.4244	0.9778	0.6621	0.692	0.5465	0.584	0.5434	0.4442	0.7	0.9428	1.5165	0.3784	0.638	0.6753
Solyc03g119920.1	1.3165	1.5437	1.7732	5.4606	5.5949	5.9745	1.9185	1.8228	1.8686	1.0169	1.927	1.6264	5.0605	3.9417	4.8556	2.1028	2.2841	1.7752
Solyc02g071220.3	23.5756	7.9064	8.887	32.9419	66.4115	15.27	15.1141	70.7392	85.3857	9.0257	32.2433	23.8133	2.2049	3.3554	5.4945	7.6313	8.9586	6.7546
Solyc01g094390.2	0	0	0	0	0	0	0	0	0.027	0	0	0	0	0	0	0	0	0
Solyc04g025560.4	0	0	0	0	0	0	0	0	0	0	0	0	0	0	0	0	0	0
Solyc07g042315.1	38.7019	39.756	42.3127	39.2402	36.5816	40.1103	35.3959	38.6089	40.2967	42.7819	50.9803	45.1155	42.7434	38.9826	40.0756	36.7121	36.378	35.648
Solyc05g007490.3	11.1499	20.9512	15.0415	22.4813	14.4985	15.9661	13.7278	10.1554	9.2163	12.9772	20.6295	16.0306	18.7365	19.9955	21.5352	14.8081	17.9063	15.3386
Solyc11g066850.3	5.9613	4.9611	6.1637	12.1365	12.5664	11.5789	5.9093	5.0975	5.6691	7.1057	5.301	7.5118	8.9983	8.3126	8.2295	5.2996	5.1348	4.638
Solyc09g031590.4	1.5265	1.4455	1.7784	3.408	3.7852	4.2682	1.8775	2.1804	1.9594	1.4021	1.747	1.5484	3.9192	2.8591	3.3461	1.8351	2.2428	1.9158
Solyc02g089310.1	5.4375	3.236	5.5939	8.0217	8.1296	7.5408	5.5439	7.1857	4.9963	6.2601	8.5369	5.6053	11.9256	9.1494	10.8724	7.4007	6.7881	6.3794
Solyc08g008040.3	15.5481	16.0446	17.0332	18.0052	20.105	16.5303	17.3219	14.7683	12.6833	16.6058	17.8363	16.5855	14.1763	13.3186	14.5345	13.8657	13.8233	12.9404
Solyc07g007430.3	18.1033	25.9884	26.3857	24.3765	33.6508	34.8294	13.1494	14.7307	14.1343	14.8965	15.8963	14.4228	16.1618	14.3252	12.5874	9.7511	8.6848	7.457
Solyc02g081210.3	1.8903	1.1273	2.9997	7.2914	3.8232	5.0242	2.9358	2.6854	1.9693	2.9591	4.0554	3.7046	6.8608	8.2084	8.8094	4.8326	5.1299	5.1707
Solyc01g150109.1	0	0	0	0	0	0	0	0	0	0	0	0	0	0	0	0	0	0
Solyc01g097490.1	0.1128	0.1758	0.1157	0	0.0714	0.0872	0	0	0.2504	0.0106	0	0	0	0.1081	0.3029	0	0	0
Solyc04g071870.1	12.3129	23.6146	27.1188	11.5228	14.0286	10.6213	6.6099	7.2627	7.2782	12.5869	9.6567	10.755	6.3359	8.2971	4.8494	3.8814	3.4988	3.5201
Solyc01g008730.3	9.4328	9.8028	10.493	12.246	16.7566	16.0719	9.2294	10.6668	11.2122	5.3117	6.3646	5.4458	10.7072	8.9409	8.5936	6.2503	6.8366	5.5401
Solyc01g068020.4	5.7323	5.5366	6.5821	15.8119	14.7202	18.6282	10.7291	9.0567	11.4568	6.2077	4.7569	6.5397	28.598	26.7913	28.5372	12.9359	13.6933	12.5329
Solyc02g089900.1	67.1968	58.7527	60.0529	15.3646	16.4873	20.8173	6.0833	23.0209	20.7687	34.2919	24.2725	20.8553	10.3391	5.9141	7.2381	7.6167	6.9227	5.2211
Solyc04g014510.3	48.928	27.4658	43.2243	9.8401	10.9218	10.3096	18.2188	15.6102	15.7998	37.6378	52.98	61.782	26.1999	42.323	37.7995	20.4544	20.8303	31.8584
Solyc01g099290.3	0.4834	0.9742	1.0977	1.4677	1.0556	0.9827	0.7608	0.8373	0.9998	0.6435	1.2473	1.3371	1.7812	2.4304	2.3152	1.0884	1.3845	2.6237
Solyc11g073020.3	46.0654	36.8441	37.919	63.4381	65.1164	69.8326	56.2222	64.5655	66.8619	25.6218	26.9079	21.8862	44.6607	40.9496	41.0943	39.217	39.1388	33.8254
Solyc12g019490.2	5.0611	5.6965	7.0895	8.9192	10.7247	9.9571	5.2823	7.2117	7.4842	5.1223	5.2553	4.5613	7.3856	8.588	10.3447	6.0832	5.4904	5.5417
Solyc04g045530.4	0.1257	0.1663	0.4902	1.1742	0.14	0.4839	1.0824	0.3428	0.4448	2.4248	1.5935	3.9668	1.4467	2.2001	2.6714	2.0758	2.1879	3.4445
Solyc10g045320.2	11.0996	11.3866	6.6727	15.9822	12.5956	11.0304	10.226	7.7983	10.6312	12.6895	13.1471	13.8932	15.0566	18.0186	16.1922	8.6681	16.0805	13.4632
Solyc06g082790.1	0	0	0	0.0598	0.0069	0	0	0	0.2548	0	0	0	0	0	0	0	0	0
Solyc06g050180.3	0	0	0	0	0	0	0	0	0	0	0	0	0	0	0	0	0	0
Solyc02g094600.2	5.8006	6.6526	8.1937	9.7517	11.4583	10.4205	9.0724	7.4463	8.608	9.3071	9.2298	8.9185	9.4187	10.4941	10.7185	9.5969	8.3306	9.1577
Solyc12g008660.1	4.0962	6.0819	5.5284	17.6336	25.9952	18.4592	2.6094	4.0877	3.7815	2.7657	2.2145	1.322	5.7599	3.5471	1.4304	2.2279	1.5232	1.2269
Solyc01g103830.1	0	0	0	0	0	0	0	0	0	0	0	0	0	0	0	0	0	0
Solyc04g005870.1	0	0	0.0053	0.0454	0.0032	0.0908	0	0	0	0	0	0	0	0	0	0	0	0
Solyc09g009583.1	0	0	0	0	0	0	0	0	0	0	0	0	0	0	0	0	0	0
Solyc10g051215.1	0.0763	0.0512	0	0.7317	0.8122	0.3979	0.192	0	0	0	0	0	1.1806	1.7804	1.9202	0.0878	0.1257	0.1482
Solyc03g122250.3	6.4051	5.1832	5.3696	24.6402	17.627	15.0714	12.4648	9.8346	10.9797	6.0876	8.9238	10.7304	18.8129	19.7573	19.9808	10.8835	13.8896	12.8125
Solyc10g074850.3	0	0	0	0	0	0.0173	0	0	0	0	0	0	0	0	0	0	0	0
Solyc08g079590.3	12.3746	8.8028	11.5921	12.4693	13.3202	13.4023	8.0721	13.742	13.9679	14.1058	14.4218	13.9122	5.9747	5.555	5.7225	7.2233	6.9496	6.1231
Solyc04g071690.4	0	0	0.0578	0	0.144	0	0	0	0	0	0.1087	0	0	0	0	0	0	0
Solyc02g021150.1	0.8047	1.6953	1.528	2.1788	2.5481	2.2293	0.631	0.8889	1.0581	1.1809	0.6878	0.4956	1.8657	0.596	1.2211	0.861	2.3114	0.9632
Solyc01g015020.4	27.5211	35.9403	30.7338	28.8247	34.9382	31.5045	26.4017	28.2505	32.7481	23.4902	27.835	24.2199	24.2194	22.567	21.0903	20.8133	21.9026	22.5871
Solyc10g054380.3	0.16	0.042	0	0.0508	0.0476	0	0	0.2086	0.1658	0.0902	0	0.0154	0.1427	0.125	0	0.1055	0.1473	0.0214
Solyc01g109230.3	4.233	3.9408	3.9544	6.4198	8.0734	8.2445	6.44	8.0484	6.8676	2.4773	3.9377	3.2929	6.7017	7.2146	9.2144	3.3046	4.1237	4.853
Solyc01g100890.4	0.4181	0	0.1605	0.2912	0	0.2582	0.21	0.2138	0.2262	0.6931	1.4192	1.5489	0.6443	0.7791	0.6147	0.5849	1.0053	1.5853
Solyc09g091560.3	6.8749	11.7713	8.871	8.7452	12.2029	10.6624	7.8445	8.3992	8.4332	6.5228	7.1555	6.9807	7.0582	8.7952	7.4645	6.1562	6.1718	6.0458
Solyc06g066520.1	0.122	0	0.6671	1.2212	1.1093	1.9241	0.9664	1.1835	1.3765	1.8726	1.2528	1.632	0.5233	1.0822	0.6593	0.8039	0.7556	1.0402
Solyc09g059570.3	1.4409	1.5738	1.0182	3.5665	3.0457	3.6703	2.6051	2.3428	2.0365	1.5134	1.213	2.2811	3.5678	3.8729	4.3918	3.5784	2.597	3.0885
Solyc00g500165.1	0	0	0	0	0	0	0	0	0	0	0	0	0	0	0	0	0	0
Solyc02g068190.1	0.0474	0.2875	0.3468	0.0727	0.0568	0.2722	0.0912	0.1331	0.0525	0.1954	0.1486	0.2568	0.0411	0.1432	0.1579	0.1034	0.0464	0.042
Solyc07g042300.1	20.5141	18.6186	21.5403	13.4542	11.651	15.8406	26.0884	27.5691	26.4823	35.2619	30.6759	36.8749	20.3144	18.0801	17.7773	25.3248	20.6995	19.428
Solyc07g064930.3	7.6115	7.3277	6.1222	9.1019	9.8069	8.5107	8.9533	7.7393	6.6963	10.1555	9.4784	11.0579	9.3812	9.936	9.8736	9.5206	8.7513	8.4823
Solyc04g076060.3	9.3895	9.7706	11.6637	24.6382	31.325	28.1864	11.6639	12.92	13.9638	10.1296	9.8504	10.5334	23.2029	21.5114	20.5133	11.8603	11.433	11.472
Solyc06g009540.1	0	0	0	0	0	0	0	0	0	0	0	0	0	0	0	0	0	0
Solyc11g069530.2	6.6473	6.2725	5.8266	11.3265	14.1997	14.1678	5.5146	6.5358	5.4468	3.6389	5.0057	5.8599	7.2338	7.9384	6.787	4.3498	4.6206	4.597
Solyc07g008030.3	6.1218	9.47	9.9895	6.3461	8.3041	8.5878	8.1128	9.3209	9.3241	8.2233	6.31	5.2822	8.9696	8.0297	7.6924	7.4126	8.5268	3.9853
Solyc08g081910.3	47.8225	51.0021	60.175	84.1805	72.4672	83.8862	70.0051	73.274	77.7154	117.166	92.2312	117.916	133.486	145.808	184.369	168.962	144.177	139.188
Solyc01g066430.3	33.8997	24.538	33.2443	31.736	65.7001	47.7584	14.4873	30.9774	33.4859	11.4907	20.3339	15.2329	9.1351	8.4457	7.7827	4.6027	4.7764	4.2757
Solyc02g085800.2	0.3994	0.0949	2.94	1.8414	0.6479	1.8639	1.5	0.6844	0.6645	2.0441	3.2117	3.225	1.1445	1.8848	5.2743	0.7023	2.7094	3.4065
Solyc07g032490.3	65.267	46.9457	67.7837	12.2189	6.4074	13.0852	95.7501	62.6863	54.3135	72.2545	108.327	69.7801	17.6953	17.9513	21.8841	98.5458	102.84	90.2724
Solyc12g010120.2	3.7261	3.385	3.706	7.6604	5.3395	5.7103	4.9715	5.2579	4.392	2.9334	4.9033	4.1657	5.9727	6.3	8.4777	5.2919	3.9898	4.2317
Solyc09g097950.3	0	0	0	0	0	0	0	0	0	0.3144	0	0	0	0	0	0	0	0
Solyc11g039400.1	0	0	0	0	0	0	0	0	0	0	0	0	0	0	0	0	0	0
Solyc06g062960.3	8.4834	10.1385	10.841	34.9668	37.6583	45.2771	8.7389	10.1032	9.2882	6.2371	7.0538	6.6333	53.1348	70.1874	56.9621	13.2812	14.4584	10.6133
Solyc07g008020.3	25.2573	42.2705	51.4918	26.2319	79.205	69.6603	9.3765	22.6404	18.3368	45.3759	33.7322	20.4961	49.2177	34.9048	11.9846	15.6178	11.5392	4.4227
Solyc05g010310.3	0	0	0.0538	0	0	0	0	0	0	0.0929	0	0.094	0	0	0	0.0418	0	0
Solyc01g020347.1	0.2243	0.4173	0	0.6429	1.2028	1.1645	0	0.4848	0.695	0.1822	0.2738	0.0937	0.8578	1.1293	1.2523	0.4284	0.6016	0.5172
Solyc07g009440.2	6.6334	8.6418	6.7996	3.7499	4.9565	5.7153	5.7926	5.4806	6.9335	0	0	0	0	0	0	0	0	0
Solyc07g049405.1	0	0	0	0	0	0	0	0	0	0	0	0	0	0	0	0	0	0
Solyc04g150117.1	0	0	0	0	0	0	0	0	0	0	0	0	0	0	0	0	0	0
Solyc10g075000.3	0	0	0	0	0	0	0	0.0446	0	0	0	0	0	0	0	0	0	0.0885
Solyc02g030280.2	0	0	0.0425	0	0	0	0	0	0	0	0	0	0	0	0	0	0	0
Solyc05g013410.3	14.127	16.5231	10.2454	2.8443	3.9576	2.5246	1.6027	3.3996	5.071	9.3835	9.3786	8.5283	2.0769	1.021	1.3143	2.1147	1.2333	1.0188
Solyc01g006550.3	0.1883	1.2165	2.0714	0.3555	0.5419	0.8013	0.2287	0.2092	0.0707	1.3913	0.6086	0.9807	0.1097	0.1304	0.0179	0.1908	0.0951	0.0635
Solyc03g114500.4	8.0887	9.5832	10.1251	5.7508	5.1681	6.6568	5.9775	4.2005	6.0727	7.7025	5.1	6.8694	3.0102	3.5971	4.464	4.8253	4.9837	5.2442
Solyc10g019050.2	0.2748	0.052	0.7138	0.3546	0.4562	0.3025	0.1574	0	0.4017	0.1702	1.1443	0.3313	0.3189	0.4511	0.399	0.537	0	0.2343
Solyc02g067600.1	1.3578	3.8758	3.5888	4.6915	5.9119	7.1583	0	0.7653	0.9511	1.2773	0.6692	0.8813	0.2077	0	0	0.3326	0	0
Solyc04g054523.1	0	0	0	0	0	0	0	0	0	0	0	0	0	0	0	0	0	0
Solyc01g079770.2	1.9586	1.4518	1.3249	4.8807	4.9638	3.9774	3.8344	2.511	2.3236	1.7806	2.3306	2.2047	4.1289	3.5507	3.2562	2.7957	2.5141	2.8997
Solyc04g080290.3	12.7068	12.3069	21.924	96.7524	66.9304	68.9482	52.3089	58.8432	80.557	21.0228	14.3384	15.8182	121.067	95.6908	104.703	97.3655	83.4399	88.2454
Solyc09g057760.4	0.4773	0.8197	0.4105	0.7266	0.7421	0.5296	0.4064	0.2508	0.5729	0.2612	0.2066	0.3219	0.1925	0.5672	0.0931	0.2705	0.2768	0.2229
Solyc09g090800.2	0	0	0	0	0	0	0	0	0	0	0	0	0	0	0	0	0	0.1661
Solyc09g061637.1	0	0	0	0	0	0	0	0.0509	0	0	0.0131	0	0	0	0	0.0233	0	0
Solyc03g123970.1	0	0	0	0	0	0	0	0	0	0	0	0	0	0	0	0	0	0
Solyc05g005540.4	13.4156	5.9243	10.3226	22.5026	7.9657	10.539	9.7054	3.8804	8.9708	6.5874	20.1481	16.9137	20.8799	50.8318	18.177	18.6496	26.6406	22.3847
Solyc10g085730.3	0.0373	0	0	0	0	0	0	0	0	0	0	0	0	0	0	0	0	0
Solyc03g123750.3	1.128	1.1499	0.9772	1.5824	3.5532	3.1342	1.1536	0.9946	1.0428	0.7056	0.7418	0.9599	1.337	1.6041	1.3989	0.8641	0.6348	0.8777
Solyc04g008680.4	20.3257	21.9578	20.5711	26.8866	29.2351	30.8969	20.2194	17.3587	19.9221	18.4078	18.1284	20.1734	20.3884	19.5857	18.9108	17.3149	15.0336	12.7979
Solyc09g009680.2	13.2162	15.3305	11.9286	14.2898	15.3297	14.6307	12.3075	10.0931	11.6014	9.2896	9.1179	9.1779	13.1862	12.6517	11.2376	8.2618	8.9084	7.2458
Solyc06g009380.3	18.2131	30.2429	23.7866	57.0922	61.6769	58.8236	20.1028	22.9305	20.102	17.2699	18.6995	16.9917	43.8143	36.9825	34.2388	22.2954	21.7549	17.5571
Solyc03g097400.1	6.1668	4.8056	5.3602	11.2452	7.5345	6.7142	12.7488	9.9612	8.8809	4.5284	5.3585	4.92	8.6101	7.5805	6.6235	6.7157	6.9634	5.3291
Solyc01g096510.2	18.4577	11.0634	21.0987	13.7267	22.1955	24.5417	4.876	15.3996	13.787	7.9757	12.7933	5.6436	1.1046	1.6172	1.2434	3.1067	1.2454	0.6095
Solyc12g038110.1	0	0	0	0	0	0	0	0	0	0	0	0	0	0	0	0	0	0
Solyc12g019144.1	0	0	0	0	0	0	0	0	0	0	0	0	0	0	0	0	0	0
Solyc08g081945.1	193.735	246.183	190.013	167.516	280.936	202.421	142.288	180.106	188.063	85.1956	84.4571	79.1627	92.7661	87.4831	56.6591	74.3626	87.5096	78.2316
Solyc07g065930.3	6.6399	6.5247	7.0779	6.6861	8.1357	10.0314	6.2554	7.6111	9.3615	7.1742	7.5568	4.8288	12.1041	9.8105	10.7472	5.6252	4.9007	6.4631
Solyc04g009770.3	133.883	134.697	143.242	139.952	205.401	187.966	158.649	157.4	135.296	89.8346	93.1494	84.5866	106.954	98.6699	84.0291	92.2341	89.5304	83.233
Solyc08g023380.1	0	0	0	0	0	0	0	0	0	0	0	0	0	0	0	0	0	0
Solyc06g074365.1	0	0	0	0	0.3091	0	0	0	0	0.0294	0	0	0.4097	0.0396	0.6502	0	0.1479	0
Solyc09g059100.2	0	0	0	0	0	0	0	0	0	0	0	0	0	0	0	0	0	0
Solyc11g006850.3	0	0	0	0	0	0	0	0	0	0	0	0	0	0	0	0	0	0
Solyc04g011880.1	48.9122	32.7792	40.2304	54.1096	77.7151	55.3562	31.109	62.0623	52.9119	62.5042	70.953	55.6494	17.6755	14.7201	18.8282	16.2943	14.1574	22.3276
Solyc04g077410.4	0.181	0.1373	0.0709	0.0673	0	0	0.0632	0	0.196	0	0.0781	0.4254	0	0	0.0307	0	0.0535	0.0609
Solyc06g061020.3	28.6025	16.5551	18.5409	11.3547	10.0795	10.1908	17.0982	20.7427	22.1538	22.5282	24.5804	22.3601	14.4459	11.2487	16.6327	22.2831	19.7271	20.5293
Solyc02g031800.1	0	0	0	0	0	0	0	0	0	0	0	0	0	0	0	0	0	0
Solyc01g104190.2	8.2729	5.8669	7.4797	15.0927	16.7609	14.5246	8.7973	9.9112	10.2236	13.9732	12.9931	14.6027	21.5785	23.6589	21.109	17.7954	13.3809	14.6567
Solyc09g065110.4	1.5686	0.9889	1.5857	3.7798	3.525	2.9889	2.0621	2.8889	2.6437	1.4497	1.8744	0.9912	1.6499	1.553	1.6139	1.532	1.1396	2.1644
Solyc05g013810.4	12.8664	22.6899	21.8034	13.6582	19.5372	16.7711	9.0912	16.0625	11.0881	10.4386	11.2185	8.6649	8.1342	6.3991	4.6142	2.7847	2.9119	2.8355
Solyc03g150121.1	0	0	0	0	0	0	0	0	0	0	0	0	0	0	0	0	0	0
Solyc10g049790.1	3.7208	3.7982	2.9074	5.0506	3.5587	4.1105	3.8922	4.1493	4.3755	1.7087	2.1361	2.378	4.2555	4.0743	3.3466	3.9494	3.3843	2.3999
Solyc01g087610.3	5.914	5.8867	6.262	13.2783	12.9961	13.4169	7.2061	6.4432	6.9829	6.6463	5.8096	6.9682	12.1284	11.6521	12.2522	9.3158	7.6342	7.4782
Solyc03g097070.3	38.553	50.486	50.7482	41.6196	54.6566	52.7658	28.8356	36.9094	33.9873	37.9682	36.1832	35.0245	32.8475	32.0734	32.8914	26.4619	23.2494	22.3113
Solyc07g051860.1	3.7285	4.156	4.355	0.2976	0.4327	0.598	3.7489	10.2857	9.4827	1.4898	1.8155	1.4195	0.3433	0.5744	0.2642	1.7149	1.2433	1.7011
Solyc01g094380.2	0.1058	0.1391	0.1464	0.3242	0.0581	0.0226	0.1257	0.2033	0.074	0	0.0657	0.0554	0.1865	0.2471	0.2051	0.158	0.3717	0
Solyc11g045360.1	0	0	0	0	0	0	0	0	0	0	0	0	0	0	0	0	0	0
Solyc02g093360.3	17.2962	14.1905	14.8894	11.2609	14.738	14.7897	13.8072	12.8471	12.9029	11.382	11.9835	13.9306	11.3848	14.4782	11.3611	14.1105	11.0338	15.0667
Solyc06g069560.3	33.0455	34.0049	31.1204	29.0084	26.8476	24.8984	44.0208	41.5847	41.7413	25.5191	25.0836	24.495	20.8028	20.8197	20.1956	28.913	27.3607	24.4625
Solyc09g007700.3	49.1958	52.1375	44.6379	45.3246	48.1584	47.9333	35.3115	36.3633	33.2347	43.7438	44.114	43.2163	40.6748	40.33	39.7504	35.1091	32.0668	34.0592
Solyc07g056220.3	8.7941	8.3821	9.871	15.1327	15.8068	16.685	8.9204	7.8518	9.5044	7.8448	8.8311	7.9692	15.5877	14.008	12.9162	9.1329	9.1923	9.9928
Solyc03g113680.4	7.9496	7.477	7.3123	29.6335	25.2134	18.9054	8.9102	6.9751	9.5005	5.4562	10.4923	8.5098	15.4334	17.0539	13.6811	7.1534	9.968	7.888
Solyc04g079820.3	0.813	1.5827	1.4294	0.5712	0.6062	1.2802	0.1711	0.3601	0.2808	2.3113	2.253	1.3718	0.0776	0.2449	0.1464	0.0921	0.2915	0.1996
Solyc02g072370.1	0	0	0	0	0	0	0	0	0.0409	0	0	0	0	0	0	0	0	0
Solyc08g006670.3	9.8387	9.6699	9.9615	16.9585	18.7329	17.8034	10.2601	14.4914	9.1085	7.4308	7.1041	8.558	8.2371	7.5657	8.3723	7.4803	7.0457	6.0704
Solyc11g005720.1	9.2676	9.2559	9.1818	7.1903	9.1834	9.1182	5.3311	6.1578	6.6564	5.539	7.3942	6.1951	4.4991	5.1276	4.8943	2.9463	1.9842	2.5001
Solyc08g068430.4	8.663	8.4979	9.1595	17.4263	19.7927	17.9167	11.6041	11.226	12.4844	7.7054	6.4994	7.3729	14.5356	13.1454	14.1098	8.3483	8.4587	7.6529
Solyc11g039720.1	0	0	0	0	0	0	0	0	0	0	0	0	0	0	0	0	0	0
Solyc04g071710.4	7.1538	11.8316	9.7884	17.2812	16.2168	14.9373	12.2061	11.2984	12.1265	10.4452	11.3137	11.2238	16.2778	13.0312	13.3455	9.7807	11.4083	11.0851
Solyc01g058100.2	0.3184	0.482	0.5203	0	0.0375	0	0	0	0.0495	0.2603	1.311	0.5824	0.1271	1.7026	0.6001	0.1821	0.357	0.3092
Solyc02g071450.3	4.0503	4.8448	3.8063	6.396	7.5197	6.0608	7.4168	7.7065	8.5439	4.5932	3.4169	3.7761	6.0396	6.2428	5.6428	5.5329	6.6352	6.1789
Solyc01g021730.2	0	0	0	0	0	0	0	0	0	0	0.1856	0	0.0456	0	0.0473	0	0	0
Solyc01g068100.4	60.595	80.946	61.0167	63.4668	76.2963	73.6057	45.04	42.4438	47.3841	51.5478	55.4918	51.5065	53.9071	52.0761	50.9015	38.701	43.6207	38.8586
Solyc02g069585.1	16.0224	14.4138	17.8413	39.502	35.4886	41.3791	26.9328	23.0315	25.2417	25.293	22.4649	28.7532	54.2972	57.0094	58.9248	31.6715	34.3405	33.4257
Solyc10g075080.1	0	0.2408	0.1087	0.0984	0.0972	0.0131	0	0.0815	0.1739	0	0.8933	0.0239	0.2621	0	0.4082	0.0837	0.2238	0.5548
Solyc05g024200.2	0.0749	0	0	0	0	0	0	0	0	0	0	0	0	0	0	0.0665	0	0
Solyc07g032180.3	8.2509	9.9288	10.5048	13.6967	13.0525	14.8012	12.6508	11.8371	12.799	7.9593	7.0257	6.5043	9.7188	14.3376	10.9661	14.9384	13.3776	11.7467
Solanum_lycopersicum_newGene_1792	0	0	0	0	0	0	0	0	0	0	0	0	0	0	0	0	0	0
Solyc10g086150.2	64.8753	75.567	85.7087	226.125	200.66	183.296	81.5043	67.3331	77.6535	215.644	161.01	248.564	270.158	236.936	250.152	168.337	121.951	107.912
Solyc04g007640.3	16.511	12.253	14.8912	13.4646	10.0651	9.0801	24.4736	20.3693	20.6231	15.3517	19.8292	19.1925	9.7406	10.8201	12.2747	15.8601	18.1634	19.5852
Solyc05g018417.1	14.2189	11.8561	11.2215	23.8012	23.9775	26.3702	10.5691	12.9298	13.385	12.3488	13.5827	13.4318	29.7669	26.1549	30.587	12.6412	13.6266	14.6443
Solyc08g005270.3	37.8294	51.2464	43.8621	60.8698	79.8996	77.2715	44.1482	45.2025	42.0567	32.8392	35.4675	31.5928	42.3834	41.5954	37.63	32.3873	32.6089	32.5656
Solyc06g073240.3	6.1577	5.6508	4.1477	12.6239	12.1975	12.5778	8.2911	7.4243	7.199	4.6635	5.2697	5.5425	15.2981	15.8931	15.2983	7.6216	7.0959	7.1255
Solyc01g010570.4	10.4922	10.9956	10.3129	13.3939	18.6831	16.3702	10.8536	13.4674	7.9242	6.703	5.7388	5.8398	8.4584	6.1367	6.0413	7.382	6.1888	4.6139
Solyc07g038100.3	1.0338	1.1385	1.3718	3.0355	3.2026	2.608	1.4802	1.4673	1.5628	1.5068	1.0908	2.0091	2.9351	2.3132	2.3192	1.4353	1.1363	1.4147
Solyc08g069010.4	25.4347	23.4702	22.4118	28.7793	15.8137	17.2294	26.9296	23.6122	21.355	27.452	34.0573	29.8124	20.3202	17.6009	19.2064	24.4304	25.4343	31.6895
Solyc04g008290.4	30.3203	26.3425	26.6696	65.0551	58.763	53.6139	36.0154	32.8105	32.2592	17.9302	22.303	22.8062	37.0218	35.6902	30.3634	23.8697	26.966	21.7138
Solyc07g150103.1	18.7345	34.2056	40.7295	5.0071	11.4553	14.6005	1.1947	2.2083	5.114	21.1966	23.5752	18.4731	2.6055	5.0213	4.1818	3.1266	4.6445	3.6004
Solyc07g005590.3	16.7272	16.0826	16.2701	26.2558	29.7952	32.281	17.1009	16.2985	16.1468	13.1849	14.0832	12.7513	21.3016	22.1625	20.4453	13.0934	13.8714	11.5893
Solyc03g006210.2	0.6134	0.0938	1.034	0.269	0.5495	0.6772	0.1564	0.0503	0	0.4387	0.1506	2.4591	0.1566	0.1565	0.5862	0.2778	0.3193	0.0579
Solyc04g080040.3	174.618	177.606	205.967	1.599	2.3693	2.9244	115.053	125.573	123.253	170.328	179.909	140.673	0.6995	0.3951	0.5042	84.7002	65.9593	66.3038
Solyc04g076240.3	0	0.0482	0	0.0227	0	0	0	0	0	0	0	0	0	0	0	0	0.0626	0
Solyc04g080990.2	0	0	0	0	0	0	0	0	0	0	0	0	0	0	0	0	0	0
Solyc04g080050.4	6.5432	7.2612	9.6089	9.4749	10.7596	10.2491	8.5679	7.932	8.5893	9.6156	11.5178	10.8213	13.5152	17.5753	18.4903	11.9657	14.8914	13.3492
Solyc04g009300.4	13.7201	16.7188	15.953	15.9763	19.7766	21.264	14.7906	15.5144	15.2011	22.3742	17.2233	22.2264	16.9339	14.7872	14.1628	15.7129	15.1957	13.1963
Solyc10g051125.1	0	0	0	0.1871	0.3381	0.1981	0	0	0	0	0	0	0	0	0	0	0	0
Solyc11g068870.2	16.1317	16.2348	15.0626	23.7061	38.9481	33.6391	17.0585	24.5916	17.7977	10.7172	11.2344	10.1635	16.8948	12.8324	11.2809	12.2951	9.8614	9.5367
Solyc09g066360.1	0.1852	2.7027	3.5541	1.514	2.1475	2.0015	0	0	0	0.9165	0.6366	0.6078	0.5926	0.666	0.7497	0	0	0
Solyc10g079290.2	1.7789	1.6369	1.4849	4.129	4.554	3.3084	2.1187	1.5545	2.062	3.6523	3.7527	5.3707	6.186	5.609	5.8046	3.59	2.9564	3.3041
Solanum_lycopersicum_newGene_470	0.233	0	0	1.3278	0.3454	0	0.1426	0	0	0	0.1506	0	0	0.1427	0	0	0	0
Solyc07g150113.1	0	0	0	0	0.017	0	0	0	0	0	0	0	0	0	0	0	0	0
Solyc09g064550.1	0	0	0	0	0	0	0	0	0	0	0	0	0	0	0	0	0	0
Solyc04g078960.1	68.5009	55.3985	55.3247	13.6699	11.1373	14.3341	39.3816	48.9701	51.4599	54.2255	45.1149	48.0205	10.0357	14.2251	10.4955	23.9117	22.0793	16.7115
Solyc02g089300.3	0	0	0	0	0	0	0	0	0	0	0	0	0	0	0	0	0	0
Solyc09g005330.3	12.5545	16.0428	13.9469	17.4802	19.6664	19.5675	11.9578	11.1602	12.5842	8.8091	8.738	7.722	9.5024	10.9319	10.9031	8.0541	8.6708	7.5419
Solyc04g081780.3	0	0	0	0	0	0	0	0	0	0	0	0	0	0	0	0	0	0
Solyc03g093250.2	0.309	0.2069	0.2344	1.313	0.8376	1.3939	0.7693	0.3559	0.3962	1.696	1.6034	2.2206	4.8647	4.0668	4.9896	1.8338	1.1235	2.4037
Solyc09g007020.1	0	0	0.0458	0.2145	0.7642	3.6865	0.1163	0	0.3234	1.4136	0.0064	0.1379	0.3816	0.0211	0	1.5249	2.021	0.1743
Solyc04g082880.4	0.813	1.1784	1.8742	3.3267	2.9713	3.619	2.4201	1.8586	2.7024	2.3506	1.7005	2.4929	3.647	4.7993	4.905	2.3453	2.5925	2.9099
Solyc02g088840.3	1.9755	0	1.7101	0.0751	0.266	0.0648	0	0	0	0	0	0	0	0	0	3.5897	0	0
Solyc10g049605.1	0	0	0	0	0	0	0	0	0	0.0436	0	0	0	0	0	0	0	0
Solyc11g072550.2	25.739	35.23	30.4399	22.3978	26.4881	25.8565	18.8358	24.2966	24.1697	29.4044	27.5658	28.3229	23.6454	19.8774	21.4049	21.9651	17.3854	17.1516
Solyc06g064470.4	65.5772	67.3267	69.8976	82.0617	88.3533	86.3539	77.4363	66.8333	64.568	96.5943	90.8381	120.308	80.9079	86.9444	90.1667	77.1146	80.0843	85.5139
Solyc03g005990.3	11.2706	8.6002	8.4694	16.4832	14.9017	14.7588	7.176	8.6031	9.6386	6.2493	10.2498	7.1249	8.5581	11.9098	9.1615	5.1072	6.3463	6.8373
Solyc09g065450.4	0	0	0	0.0594	0	0	0	0	0	0	0	0	0	0	0	0	0	0
Solyc05g013240.4	21.2656	22.4077	27.0777	46.546	50.2927	50.6639	26.6412	27.3141	26.1806	23.2122	22.4298	23.6918	43.991	45.7673	42.3124	29.2571	22.0591	24.4278
Solyc01g081605.1	0	0	0	0	0	0	0	0	0	0	0	0	0	0	0	0	0	0
Solyc09g075830.3	38.4053	47.456	43.8097	84.7713	79.0783	85.6516	38.8803	33.5701	36.5508	30.1305	33.7646	28.61	55.3341	51.0245	47.7274	26.7364	27.3061	24.0035
Solyc02g022930.3	3.0558	2.8362	2.4154	7.0956	10.2162	11.4574	3.1091	3.584	4.3691	3.7635	2.8889	3.4392	8.9682	7.9962	8.4561	4.369	4.0945	4.8011
Solyc01g106957.1	0	0	0	0	0	0	0	0	0	0	0	0	0	0	0	0	0	0
Solyc01g094150.3	8.3175	8.0052	7.6187	9.247	12.1469	10.6537	7.8557	8.9519	8.4077	5.9633	6.4668	4.7732	8.3051	7.8174	7.4956	6.3817	5.9947	6.2524
Solyc08g067280.1	19.745	21.1406	15.909	11.6584	11.3276	10.0899	15.2055	16.121	14.3848	11.2943	15.4555	13.7209	9.0672	10.2052	10.4262	12.4397	10.2228	10.3051
Solyc06g076590.3	7.9173	6.5633	7.893	14.056	13.9056	13.2532	7.3846	8.7722	8.7022	6.3762	6.5982	6.2614	8.725	9.8205	7.7289	5.3097	6.1414	6.7049
Solyc06g065410.3	0.4546	0	0.1801	0.2981	0.1681	0.1631	0.287	0.3862	0.2029	0.1233	0.2095	0.3882	0.1665	0.3093	0.3283	0.0757	0.3293	0.4941
Solyc06g054280.1	0	0	0.0566	0.0387	0.0676	0	0	0	0.09	0.0258	0	0	0	0	0	0.0352	0	0
Solyc08g041980.3	14.6496	17.4353	21.5856	30.068	31.0084	31.1202	20.1043	19.872	20.5999	13.2745	14.0369	15.2665	23.6964	27.8426	24.2922	16.0794	16.8269	14.5567
Solyc10g085520.1	0.0829	0	0	0	0	0	0	0	0	0	0	0	0	0	0	0	0	0
Solyc09g098480.1	0	0	0	0	0	0	0	0	0	0	0	0	0	0	0	0	0	0
Solyc10g081920.2	11.6084	12.0966	12.4396	23.8173	21.0485	23.1497	16.2119	12.5651	13.5699	10.5085	14.6681	13.5712	27.3564	31.7282	29.7922	17.8799	20.442	19.6835
Solyc09g014705.1	0	0	0	0	0	0	0	0	0	0	0	0	0	0	0	0	0	0
Solyc12g006820.1	0.0375	0	0.0345	0.0201	0	0	0.5703	0.0554	0.0788	0.0714	0.1457	0	0	0	0	0	0	0.0297
Solyc03g111010.4	103.579	103.119	110.573	84.5451	113.512	118.848	74.6604	102.79	105.72	127.12	107.15	110.608	140.394	126.697	122.979	135.271	123.366	119.106
Solyc07g005750.3	2.2375	2.1365	1.8211	4.2782	4.7443	5.0032	3.2904	3.5659	3.8207	1.5954	2.2748	2.1094	4.3099	3.9753	3.7292	2.3515	2.3563	2.1482
Solyc09g007780.1	0	0	0	0	0	0	0	0	0	0	0	0	0	0	0	0	0	0
Solyc11g005440.2	0.2722	0.0895	0.3291	0.4522	1.052	0.6786	0.2072	0.1888	0.3144	0.4055	0.309	0.5102	0.3364	0.5376	0.3818	0.3548	0.3508	0.093
Solyc07g066250.1	0	0	0	0	0	0	0	0	0	0	0	0	0	0	0	0	0	0
Solyc11g071800.2	9.5848	8.0928	8.6691	12.7542	11.3994	9.6777	11.8478	11.7872	14.9464	12.0521	11.9719	14.999	18.0552	17.8624	18.2753	22.2828	21.3391	22.396
Solyc07g049563.1	0	0.2133	0.1457	0.816	0.4709	0.7232	0.4962	0.5452	0	0.2636	0.3425	0.1739	0.552	0.6815	0.7185	0.4889	0.3126	0.4457
Solyc01g009710.1	0.5651	0.515	0.8442	0.3641	0.841	0.4719	1.0975	2.0442	0.888	0.1496	0.515	0.76	0.3146	0.2333	0	0.1246	0.446	1.026
Solyc07g052720.4	0.4858	1.9389	1.4716	3.184	3.7262	6.4298	2.7928	1.6821	6.26	6.6498	6.3306	4.4195	14.2022	16.8746	19.5599	8.7441	8.9397	10.4795
Solyc05g016415.1	0	0	0	0	0	0	0	0	0	0	0	0	0	0	0	0	0	0
Solyc04g077050.3	61.1477	75.2589	76.105	36.3088	53.8654	59.0471	31.8501	51.7128	44.7562	67.2312	77.2207	59.3763	28.7502	27.2063	24.8587	36.2486	31.8661	29.1631
Solyc02g068660.3	1.9213	3.996	3.3241	4.587	6.3498	4.4207	0.603	1.3226	1.1124	0.8698	1.0713	1.0572	0.4439	0.3175	0.7342	0.1689	0.1479	0.0767
Solyc03g005190.3	50.3042	40.1103	47.1494	72.4572	57.039	61.614	78.3763	65.9643	60.9361	82.0291	88.7739	94.9893	104.042	101.754	124.781	80.6903	85.7825	102.713
Solyc11g017470.2	55.0364	56.8282	66.8292	124.947	157.859	135.992	25.3874	61.0035	55.1994	65.2907	83.2966	69.7636	27.6422	23.9171	22.1924	18.5384	18.2268	14.3684
Solyc11g045110.3	8.2469	9.7768	9.8456	8.5549	10.3255	9.2036	8.4773	8.5255	10.2437	8.5895	7.9321	7.0498	5.0176	5.612	6.0901	4.0997	4.8885	6.1507
Solyc04g081140.1	0	0	0	0	0	0	0	0	0	0	0	0	0	0	0	0	0	0.0268
Solyc02g055533.1	0	0	0	0	0	0	0.1786	0	0	0	0	0	0	0	0	0	0	0
Solyc03g122110.1	0.3227	0.6656	0.9528	0.4436	0.5353	1.023	0.3485	0.6235	0.875	0.1803	0.5	0.2173	0.5416	0.3617	0.3043	0.2853	0.2867	0.4789
Solyc06g075840.1	0	0	0	0	0	0	0	0	0	0	0	0	0	0	0	0	0	0
Solyc01g011320.2	0	0	0	0	0	0	0	0	0	0	0	0	0	0	0	0	0	0
Solyc11g066100.2	27.9836	9.8243	8.7376	0.9168	0.8304	0.8102	13.2934	7.2197	11.7461	30.6388	26.0655	55.6619	4.0903	5.0276	4.5324	41.4243	48.1993	52.5974
Solyc06g060050.1	0.2312	0.1323	0.1525	1.0255	1.434	0.9629	0.0863	0.2104	0.2088	0.1305	0.2029	0.3086	0.7287	0.6988	0.7185	0.0282	0.0616	0.0235
Solyc11g071490.2	9.7556	11.5294	10.6337	13.0632	13.641	13.7345	10.6567	9.2259	9.82	14.2388	13.9832	19.5458	11.7973	13.3623	14.2503	13.2794	15.4293	17.9094
Solyc09g014610.4	0.2039	0.3675	0.2141	0.3714	0.2172	0.0947	0.1688	0.0171	0.2773	0	0.1639	0.4952	0.025	0.0739	0.021	0.0938	0.0797	0.0457
Solyc01g018015.1	0	0	0	0	0	0	0	0	0	0	0	0	0	0	0	0	0	0
Solyc01g017260.1	0	0	0	0	0	0	0	0	0	0	0	0	0	0	0	0	0	0
Solyc08g066940.4	3.7665	3.0115	3.0426	25.8031	24.8832	24.0339	6.5927	6.3646	11.9478	2.0521	2.7541	2.9965	46.9579	36.9682	39.8321	19.133	16.6146	17.0916
Solyc01g095460.3	38.7334	33.3294	28.323	13.4397	18.8062	18.6445	28.5993	33.4678	26.855	31.2748	34.6548	26.0934	9.5835	9.8474	7.111	15.4234	15.3053	11.8334
Solyc01g111430.2	12.4918	17.1037	9.5854	1.7938	2.6702	2.5428	1.134	2.2224	2.3608	4.4964	4.24	4.4638	1.6237	1.7848	1.6527	1.1939	0.8681	0.8458
Solyc09g015585.1	0	0	0	0	0	0	0	0	0	0	0	0	0	0	0	0	0	0
Solyc05g053440.4	40.316	43.3496	45.8526	50.0914	43.4109	55.1712	42.2929	37.0641	33.4189	63.9864	50.262	85.9444	55.5272	49.0839	54.492	45.4614	47.3251	51.123
Solyc11g006520.2	1.9886	2.105	1.6128	1.1878	1.8264	1.5181	1.8941	1.569	1.2802	0.9753	1.4764	0.9986	0.8259	1.0964	0.9594	1.2605	0.969	1.435
Solyc07g053560.3	1.816	2.6311	2.5361	3.8365	3.8522	4.5373	2.6078	2.9275	3.0552	2.042	2.7519	2.6206	3.1034	3.0739	3.6516	2.1608	2.2073	1.8447
Solyc12g095930.2	8.0251	9.0722	9.8605	9.5479	10.4372	9.902	8.8514	8.6524	10.506	11.0976	9.0072	10.8289	10.3183	8.3702	8.6714	8.1138	6.8348	7.8419
Solyc02g082470.4	24.9737	25.5737	26.672	31.1893	39.3311	39.09	23.6069	26.1102	30.2708	14.7611	15.6012	12.6288	27.4576	26.2475	25.3918	19.3861	15.401	14.112
Solyc02g078560.4	10.2854	12.1302	11.8545	15.8216	19.3468	16.1925	11.0752	11.1887	11.444	8.0545	8.5195	8.6332	11.281	10.9818	9.2469	8.857	7.8991	7.9137
Solyc02g084870.3	3.4151	7.4794	4.0321	9.5068	12.0533	11.003	1.9207	1.5113	1.7667	4.0112	2.8311	3.8185	8.3978	7.6542	8.4754	3.303	2.6009	2.3807
Solyc04g072260.3	1.4066	1.8618	1.3025	2.5776	3.1829	2.8651	1.3433	1.3546	1.6555	1.1501	0.9868	0.9518	1.1259	1.4064	1.2425	0.7328	0.7107	0.5118
Solyc05g055760.3	5.6957	7.201	12.5948	19.4756	19.1882	32.7026	11.7923	19.5858	23.4311	11.5123	8.0354	8.8641	64.8031	55.6556	59.6337	34.5926	30.5727	18.8329
Solyc01g150156.1	5.0697	6.4836	5.9624	5.7472	6.5321	6.6073	3.5775	2.7886	4.1168	7.0489	8.1795	9.1263	6.846	8.7721	8.7941	5.2295	5.088	5.4093
Solyc02g087140.3	6.5753	4.0229	6.3369	9.8948	11.1512	10.6862	4.6232	10.287	7.2205	8.0494	7.157	7.0475	15.549	10.6852	12.628	10.2588	9.3859	8.7183
Solyc04g057900.1	0	0	0	0	0	0	0	0	0	0	0	0	0	0	0	0	0	0
Solyc01g009470.2	0	0	0	0	0	0	0	0	0	0	0	0	0	0	0	0	0	0
Solyc01g105030.3	797.192	762.312	661.034	118.161	71.0577	80.7068	702.45	668.868	558.831	731.561	923.446	796.923	119.552	102.278	110.319	897.744	994.233	1089.66
Solyc10g084670.3	1.0683	1.27	1.2851	5.5676	4.0011	3.8197	2.2115	1.5521	1.5749	3.5468	3.2207	5.2268	4.7374	5.6602	5.0872	3.3934	3.3988	4.0363
Solyc11g045690.3	0	0	0	0	0	0	0	0	0	0	0	0	0	0	0	0	0	0
Solyc11g005130.2	11.3118	12.7544	11.8102	14.8505	14.5532	13.3516	11.9731	11.9232	10.8046	8.4722	9.0027	8.5878	8.7331	8.3824	7.7244	7.6163	7.0489	6.3815
Solyc04g072830.4	13.9116	16.6376	17.1081	10.9219	11.8538	12.8731	13.6121	15.0005	16.3725	14.934	15.1436	12.0903	8.9307	8.9044	8.3775	10.1317	10.6204	8.3249
Solyc07g005945.1	4.4177	5.1723	6.046	14.8496	12.0955	14.5647	9.1053	5.8423	6.1674	6.4139	4.1747	6.1626	9.409	9.9723	9.7741	4.8756	3.343	5.1967
Solyc03g034450.4	7.9025	7.9685	6.5666	7.7077	8.7206	7.3838	7.5225	8.0797	7.7889	5.417	6.1652	4.4931	5.1224	6.1654	4.878	5.188	4.8672	3.828
Solyc08g029070.2	0	0	0	0	0	0	0	0	0	0	0	0	0	0	0	0	0	0
Solyc12g096440.1	0	0	0	0	0	0	0	0	0	0	0	0	0	0	0	0	0	0
Solyc01g099035.1	0	0	0.1949	0	0	0	0.454	0	0	0	0	0.1334	0	0	0	0	0	0
Solyc01g150160.1	0.7153	1.063	1.1146	2.493	2.3514	2.7714	2.0553	1.4363	1.401	0.4695	0.6348	0.8908	2.3891	1.464	1.7971	1.0183	1.1086	1.1909
Solyc07g025457.1	1.5119	0.716	1.013	1.7759	2.0025	2.4169	2.4353	1.5169	2.3925	1.2923	0.8612	0.8953	2.6108	3.0206	1.8336	3.2707	3.2154	3.3575
Solyc11g008010.2	18.0956	21.1816	22.3208	21.995	33.0542	33.6487	13.9816	12.0094	15.331	19.655	15.4677	18.6234	21.8266	21.7337	18.7822	13.5915	12.854	12.751
Solyc06g066130.1	0.058	0.1499	0	0	0	0	0	0.3137	0.1648	0.0448	0.0192	0.0444	0	0	0.1065	0.038	0.0849	0
Solyc03g121850.3	2.0902	2.2987	2.1681	6.5436	8.8263	8.1611	1.5082	1.4774	2.5004	1.897	1.1007	1.2818	5.9287	6.2472	7.2728	2.099	1.4036	1.6091
Solyc05g045710.3	0	0	0	0	0	0	0	0	0	0	0	0	0	0	0	0	0	0
Solyc11g012100.2	8.8002	8.4224	8.1002	5.5308	8.7989	8.7104	7.1282	7.8937	6.6419	5.457	6.7143	7.1447	4.5544	3.6531	4.2766	5.6135	4.6865	4.6973
Solyc06g084530.3	26.3232	25.9477	35.6415	22.4186	29.3327	30.8527	15.4934	14.7961	16.743	23.1367	21.8165	16.9782	17.1379	16.3051	15.3978	12.2392	11.9879	11.2617
Solyc00g500352.1	0	0	0	0	0	0	0	0	0	0	0	0	0	0	0	0	0	0
Solyc12g010830.2	13.5753	17.6321	12.6688	17.0647	22.3955	18.5313	12.85	15.8057	16.0581	9.5779	8.5461	8.2489	9.0686	9.6816	7.079	6.9897	6.4165	6.1497
Solyc07g020860.3	92.1143	97.2146	89.4076	113.524	151.643	148.541	70.7915	89.3329	92.7086	123.562	98.9977	121.676	162.672	132.015	131.084	101.071	98.5401	99.0445
Solyc03g111090.4	15.5148	22.4985	19.7015	17.9833	22.4083	19.5971	16.5997	15.9197	15.0021	15.8632	17.9252	15.5516	13.3684	12.7662	11.9387	11.23	12.0076	11.4666
Solyc06g062880.2	2.292	1.095	1.4089	1.5879	1.1476	2.0276	1.7757	1.3781	1.3277	1.0244	1.2736	2.3834	0.8321	0.8098	0.9402	1.3187	0.9314	1.2054
Solyc03g078490.4	6.1385	11.6385	27.7409	4.8094	19.617	34.9619	4.8528	6.1793	6.7339	15.2349	10.1924	3.5968	3.2303	3.3853	4.5292	5.3896	2.1475	1.7833
Solyc04g025100.1	0	0	0	0	0	0	0	0	0	0	0	0	0	0	0	0	0	0
Solanum_lycopersicum_newGene_1592	0.4121	1.6164	1.3498	0.6654	1.2804	1.5254	0.5702	0.788	0.3891	0.9741	0.7169	0.8426	0.473	0.6266	0.6854	1.0286	0.8597	0.6205
Solanum_lycopersicum_newGene_1593	0	0	0.0842	0	0.0738	0.0464	0	0	0	0	0	0.1454	0.0829	0.1274	0.2017	0.1997	0.1016	0
Solanum_lycopersicum_newGene_1594	0.1414	0.128	0.2819	0.3312	0.3011	0.5995	0.2072	0.1723	0.0541	0.4037	0.0972	0.4489	0.3853	0.2089	0.7465	0.2145	0.146	0.2049
Solanum_lycopersicum_newGene_1595	0.1048	0	0	0	0	0	0	0	0.2965	0	0	0	0	0	0	0.1698	0	0
Solanum_lycopersicum_newGene_1596	0.2698	0	0.4974	0.4156	0.9739	0.7407	1.5192	0.5122	1.0113	0.2176	0.457	1.0509	1.1565	0.9298	1.0251	0.6792	0.3056	1.1207
Solanum_lycopersicum_newGene_1598	0.8637	0.4743	0.7424	0.8826	1.3863	0.7426	0.3858	1.3793	1.181	0.4189	1.3113	1.3019	0.1699	0.4289	0.5423	0.3867	0.3607	0.6009
Solanum_lycopersicum_newGene_1599	0.1253	0	0.2664	0	0.1801	0.1588	0	0.1013	0.0531	0.0124	0.1234	0.154	0	0.0415	0.0871	0.0263	0.1333	0.0556
Solyc10g007200.3	2.3713	2.2914	3.2089	6.8895	6.259	7.6377	4.6745	4.2324	5.4271	3.7477	2.8808	4.5488	8.1473	7.5665	7.8132	5.8965	5.8829	5.5466
Solyc03g093060.1	0	0	0	0	0	0	0	0	0	0	0	0	0	0	0	0	0	0
Solyc10g079050.2	2.6641	2.9291	2.9603	4.1473	6.09	4.5274	2.2476	2.1776	3.6604	2.7129	2.299	2.6286	2.9621	3.0543	2.6708	2.2165	1.8669	1.9688
Solyc12g019940.1	0	0	0	0	0	0	0	0	0	0	0	0	0	0	0	0	0	0
Solyc06g016673.1	0	0	0	0	0	0	0	0	0	0	0	0	0	0	0	0	0	0
Solyc11g150109.1	0	0	0	0	0	0	0	0	0	0	0	0	0	0	0	0	0	0
Solyc03g115000.3	16.957	17.482	13.8407	30.885	21.9262	19.8841	39.9337	26.8279	27.71	12.7683	15.2969	15.0462	27.0047	27.4315	23.755	23.4538	23.8191	24.4057
Solyc01g009250.3	1.3828	0.6906	1.0067	0.4902	1.523	1.3231	1.1702	1.6249	2.3711	0.7738	0.6483	1.1723	0.5963	0.568	0.6952	0.432	0.3493	0.7585
Solyc08g067450.1	0	0	0	0.0523	0	0	0	0	0	0	0	0	0	0	0	0	0	0
Solyc09g092200.3	0	0	0	0	0	0	0	0	0	0	0	0	0	0	0	0	0	0
Solyc01g008200.3	3.5353	3.9963	3.4097	3.1347	3.924	4.973	2.9976	2.7405	4.0083	3.4144	2.5979	2.9313	3.3596	4.0387	2.9381	2.3738	2.5989	2.2514
Solyc09g055750.1	0	0	0	0	0	0	0	0	0	0	0	0	0	0	0	0	0	0
Solyc03g112700.1	14.7516	17.9305	25.667	7.1028	11.6475	11.8437	11.4743	20.3571	16.3867	8.1196	6.9959	6.4161	1.8392	2.401	2.6333	4.8665	3.4096	1.7456
Solanum_lycopersicum_newGene_2648	0	0	0	0	0.3214	0.1083	0	0	0	0.1424	0.0837	0	0.3723	0.2355	0.0412	0.0597	0	0
Solyc02g082970.1	1.9965	2.1185	2.1051	2.7295	3.8813	3.2764	1.6431	1.6048	1.5502	1.9066	1.6823	2.7632	2.0265	2.041	2.5931	1.9003	1.8568	1.4676
Solanum_lycopersicum_newGene_2645	0.2072	0.156	0.1377	0.2289	0.0799	0.1997	0.2287	0.1833	0.787	0.2278	0.1552	0.3049	0.4042	0.225	0.1149	0.1155	0.1549	0.1841
Solanum_lycopersicum_newGene_2644	0	0.271	0.1192	0.0901	0.2623	0.1626	0.0685	0.1218	0.161	0.0638	0.2076	0.2346	0.2718	0.1423	0.0745	0.5083	0.0705	0.2718
Solyc06g005890.3	1.4106	1.4044	0.9951	2.35	1.8763	2.1635	1.1551	1.8758	1.7576	5.6955	7.2318	7.3844	10.3637	12.7651	9.7032	4.9852	5.8729	5.8001
Solyc08g067440.2	0.198	0	0.2398	1.2249	0.2936	0.3737	1.0212	0.6151	0	0.498	0.1442	0.578	0.3693	0.2452	1.0564	0.3871	0.0798	0.5099
Solyc11g067080.3	14.8796	10.1888	14.4904	7.1589	9.4828	8.7009	11.8992	13.1922	14.0661	11.7674	12.7436	12.8813	5.2402	5.6412	6.1575	11.016	12.3976	10.235
Solyc10g009060.1	12.016	11.7271	10.6728	10.4507	14.1306	10.1805	14.4642	15.2998	12.9345	7.7281	7.7251	7.7788	5.6744	6.2639	5.4921	5.8382	4.9605	5.602
Solyc05g018350.4	7.4407	8.0258	7.9396	10.2709	12.6582	10.5705	9.5413	8.4072	10.2625	8.8666	7.8668	8.5554	10.3788	10.7543	9.7657	7.7836	9.4921	8.545
Solyc01g096110.3	3.2446	4.0051	3.525	6.0022	5.8819	6.1493	3.1465	2.9566	3.9409	3.1513	2.976	2.4037	4.0473	3.6325	3.649	2.5358	2.9666	2.1263
Solyc05g005610.4	0.3964	0.4442	0.5825	0.6302	0.9045	0.4344	0.7608	0.7911	0.8796	1.2334	0.6717	0.6389	0.7286	0.432	0.5147	0.3452	0.422	0.6244
Solyc06g073870.4	16.159	20.6563	23.2322	28.0093	29.5667	29.7434	21.5519	24.7962	24.0757	37.7094	26.593	32.7708	33.843	32.6215	35.5513	29.3326	25.721	30.0189
Solyc02g088690.4	55.1391	59.5626	53.9423	64.5373	48.6447	54.9239	42.0451	37.9624	42.9298	42.1396	47.7868	49.0127	156.11	184.58	192.299	73.7045	114.636	88.4888
Solyc09g042760.2	0	0	0	0.0191	0	0	0	0.0121	0	0	0.0578	0.0784	0	0.0411	0	0.0233	0.0221	0.0453
Solyc00g500267.1	0	0	0	0	0	0	0	0	0	0	0	0	0	0	0	0	0	0
Solyc10g008590.1	0.3375	0.286	0.2729	0.5035	0.4532	0.8303	0.1734	0.2109	0.0649	0.136	0.3209	0.1619	1.0491	0.6505	1.0233	0.108	0.1157	0.0693
Solyc01g091610.1	0.184	0.1899	0.0908	1.3069	1.0132	1.2734	0.3667	0.2929	0.141	0.1387	0.1467	0.1557	0.5677	0.7146	0.9112	0.1049	0.0436	0.0816
Solyc07g062440.1	3.6306	4.5864	3.7714	5.8763	8.3679	7.8963	3.9943	3.6896	3.9835	6.7982	6.0277	7.9517	8.956	7.024	8.3017	6.3049	6.9998	5.1689
Solyc10g085930.3	4.4111	4.5094	3.9626	6.8039	8.2931	6.6089	5.9543	6.5119	5.0525	2.9092	2.4009	2.7506	4.2751	5.3266	4.3427	3.791	3.6409	2.9933
Solyc10g083620.2	0	0	0	0	0	0	0	0	0	0	0	0	0	0	0	0	0	0
Solyc06g061140.3	5.7778	6.0955	5.8056	9.5867	10.0938	7.9038	7.5785	9.463	7.815	5.374	5.5932	4.9064	6.8149	5.9603	7.6644	4.3607	5.3652	5.484
Solyc10g049550.3	0	0	0	0	0	0	0	0	0	0	0	0	0	0	0	0	0	0
Solyc08g078240.4	16.8993	16.0025	14.6521	22.2365	25.46	24.26	18.2629	17.5573	20.1544	15.1683	12.6538	15.9954	24.2286	21.1688	22.0751	17.6992	17.5488	15.2188
Solyc05g024290.3	24.2851	26.2698	25.0922	20.9269	28.3406	28.4944	19.597	20.7245	22.4616	19.9878	18.201	17.0589	17.0536	15.8059	16.089	15.5518	14.803	13.1622
Solyc06g074230.3	0	0	0	0	0	0	0	0	0	0	0	0	0	0	0	0	0	0
Solyc12g056470.2	0	0	0	0	0	0	0	0	0	0	0	0	0	0	0	0	0	0
Solyc06g065240.3	3.9371	3.7806	4.4469	7.7596	7.6765	7.9991	5.8782	4.9155	5.9827	5.6909	4.9086	6.435	6.1877	5.9093	6.4012	4.7843	3.5335	5.7384
Solyc04g005280.4	12.8754	14.4067	13.6701	16.3626	19.706	17.7187	14.3709	15.434	15.4928	9.85	10.7646	10.3865	13.3598	13.3558	12.4191	9.9786	11.9691	9.2848
Solyc06g007970.3	0.4329	0.1334	0.0836	0.3464	0.4525	1.0744	0.3	0.1011	0.4028	1.5298	0.5242	1.7542	1.5276	1.2141	1.9729	0.9909	2.3704	2.4459
Solyc04g064690.4	0	0	0	0	0	0	0.0534	0	0	0	0	0	0.0568	0.0364	0	0	0	0
Solyc05g014630.2	0.2595	0.1319	0.2249	1.0551	0.7264	0.6987	0.4089	0.3588	0.2275	0.1694	0.1002	0.4549	0.8968	0.6171	1.0601	0.3123	0.3688	0.3084
Solyc02g091430.4	11.1337	12.8639	16.3258	17.6204	26.9365	19.2773	9.069	14.3015	13.0042	8.2031	7.0486	5.0285	10.9045	8.7066	7.1436	8.3672	5.4201	6.2403
Solyc07g056650.4	11.0393	6.4141	9.1998	18.4591	11.2002	10.1347	7.516	3.637	3.6584	4.0251	6.3158	6.3516	13.6247	19.8186	15.8117	5.3728	6.3027	7.0754
Solyc10g006230.3	3216.92	3300.2	3069.26	877.701	495.34	558.342	2807.71	2389.13	2235.86	2700.37	3115.62	2584.7	1247.08	1179.66	1445.3	2603.1	2946.62	2973.55
Solyc06g069640.3	0.9816	0.3662	0	0.2413	0.6038	0.6829	0	0.9319	0.1372	0.1152	0	0.2951	0.0954	0	0	0	0	0
Solyc03g034020.4	3.4367	6.2783	8.965	5.1584	8.1173	8.8349	2.6926	3.8751	3.5027	5.1597	3.5629	4.6173	3.1871	3.1285	2.6897	1.8703	1.3611	0.8038
Solyc08g041700.1	0	0.0315	0.2073	0.1034	0	0	0	0.05	0.2072	0.1514	0.1151	0	0	0	0	0	0	0
Solyc06g054160.2	0	0	0	0	0	0	0	0	0	0	0	0	0	0	0	0	0	0
Solyc07g047680.3	1.8594	1.7952	1.1336	4.6581	2.3807	3.9297	2.2436	2.8011	4.028	3.0649	2.1622	4.1625	1.3681	2.8767	1.3866	2.0834	1.2551	1.6851
Solyc12g088910.3	4.1879	7.0319	4.8421	7.9855	7.4255	6.1435	4.4227	4.514	3.6032	4.0581	5.7154	6.2886	11.4476	13.914	15.4645	6.4134	7.9672	7.9074
Solyc09g082050.4	6.6179	7.1698	7.138	12.2333	11.9126	11.9441	8.1321	8.2606	8.2104	5.5959	5.061	5.6701	9.7288	9.2883	10.3378	7.6426	7.4388	6.7649
Solyc04g015520.3	15.5689	17.9385	15.7428	9.0949	9.9231	9.3943	22.4011	26.2818	24.395	13.2466	16.8218	13.0715	12.1165	9.0545	9.5083	14.4931	12.8784	13.7989
Solyc00g500291.1	0.5097	0.4101	0.7043	1.1924	0.9891	0.5018	1.0214	0.9912	1.4092	0.2471	0.2896	0.3856	0.2404	2.8265	0.3878	0.0582	0.3097	0.1158
Solyc07g055960.3	0.2625	0.1757	0.3646	0	0.085	0.1249	0.0998	0.2147	0	0	0.5122	0.3178	0	0	0	0	0.2778	0.1909
Solyc10g062235.1	0	0	0	0	0	0	0	0	0	0	0	0	0	0	0	0	0	0
Solyc03g083910.5	105.364	114.714	102.261	76.1639	92.5448	93.1399	60.622	61.4482	61.7109	44.3455	37.7297	37.3444	42.5389	39.3318	33.8108	40.2805	38.3678	32.8421
Solyc08g080090.3	14.1997	26.9157	20.4041	11.6965	17.8937	15.9988	14.5099	26.9232	31.1682	14.8792	9.4169	9.9372	13.914	16.5076	20.7272	26.4352	26.9988	20.9127
Solyc03g044748.1	0	0	0	0	0	0	0	0	0	0	0	0	0	0	0	0	0	0
Solyc09g055860.1	0	0.1438	0.4255	0.3854	0.2312	0.5238	0	0	0.0969	0	0	0.4394	0.5645	0.3369	0.2907	0.2635	0.224	0
Solyc10g048060.2	0.439	0.2032	0.063	0.4137	0.5492	0.0648	0.2318	0.4675	0.3586	0.7885	0.0506	0.5848	0.6515	0.7704	1.2132	1.463	0.5023	0.5089
Solyc10g008267.1	0	0	0	0	0	0	0	0	0	0	0	0	0	0	0	0	0	0
Solyc12g042400.1	0.0878	0.126	0.1928	0.3212	0.3935	0.6367	0.1683	0.065	0.2115	0.0853	0.1996	0.0967	0.3048	0.3808	0.3749	0.0799	0.1696	0.0237
Solyc01g057530.1	0	0	0	0	0	0	0	0	0	0.0678	0	0	0	0	0	0.0816	0	0
Solyc00g500285.1	0	0	0	0	0	0	0	0	0	0	0	0	0	0	0	0	0	0
Solyc07g041300.2	0	0	0	0	0	0	0	0	0	0	0	0	0.1257	0	0	0	0	0
Solyc11g069840.3	0.8523	0.2961	0.2902	0.4995	0.1471	0.1369	0.6314	0.6974	0.2568	0.4556	0.9482	1.0534	0.607	1.0761	0.9478	0.8122	0.5946	1.1208
Solyc08g077490.2	0.7026	1.1935	1.081	1.6094	2.2676	2.5068	0.1245	0.3224	0.6639	0.5223	0.8317	0.4782	1.6049	2.3337	2.1875	0.6981	0.7367	0.783
Solyc11g068800.2	6.2098	7.9736	8.2323	5.1708	5.5729	6.0212	6.9263	7.0089	6.9063	4.3472	5.749	4.583	3.9499	4.1734	4.2286	3.6808	4.6202	4.3248
Solyc12g038527.1	1.0698	1.3258	2.2138	2.3333	2.1983	2.4907	1.6003	1.6616	1.5848	1.3688	0.6887	0.9186	1.6906	1.4878	1.0009	0.8089	0.7045	0.8457
Solyc05g017770.1	0	0	0	0	0	0	0	0	0	0	0	0	0	0	0	0	0	0
Solyc04g082470.3	11.9282	14.515	14.227	17.3504	22.256	17.9383	14.8779	15.4467	12.578	9.7148	9.1943	9.2399	10.5384	8.96	8.5238	8.494	9.3132	8.5571
Solyc01g014270.3	12.1869	9.2725	8.9738	12.1986	11.3674	10.8667	9.4951	9.1738	9.6827	15.6665	10.3926	14.3305	8.9956	8.5401	7.2752	10.5236	7.1854	7.8477
Solyc05g012900.4	4.0557	8.0062	4.9333	2.337	3.1297	4.7008	1.7949	4.3247	3.3658	4.1153	4.1727	1.9615	1.9506	0	1.1884	1.0197	1.6719	0.2759
Solyc09g090270.3	10.3018	9.2024	10.362	24.6548	28.365	29.7904	9.5266	10.9653	11.7515	8.9605	10.7238	10.2236	22.6805	21.4674	20.4986	12.8037	11.7374	10.706
Solyc06g051130.1	4.7989	4.5803	2.3996	4.0731	3.3084	4.2175	4.2933	3.1294	2.8479	3.1847	4.223	3.0947	2.692	3.138	3.019	1.4834	2.2013	1.7426
Solyc02g065080.3	10.2703	8.4564	8.7464	12.1205	13.9649	14.0743	11.4298	11.1667	11.5687	7.6491	7.2138	7.7215	8.3667	9.542	9.8916	8.0311	6.8042	6.498
Solyc04g039980.3	3.1293	6.8885	5.0821	2.3687	3.1103	1.8716	1.7812	3.0815	2.5717	7.1305	7.9695	7.3881	2.5072	4.3483	4.0085	2.7556	2.8725	3.5709
Solyc12g035490.1	5.5544	4.6144	5.481	8.4289	10.0287	9.9114	3.6592	3.7885	4.0621	4.6626	3.1113	3.527	8.0354	7.233	8.1676	4.4799	4.5503	4.4809
Solyc02g082660.3	4.1544	4.5112	4.0831	6.7239	6.3921	7.7939	4.6413	4.5852	5.2851	3.2665	3.4322	3.2354	5.7934	6.8433	6.2459	4.2128	4.09	3.8083
Solyc01g009505.1	0	0	0	0	0	0	0	0	0	0	0	0	0	0	0	0	0	0
Solyc10g045155.1	0	0	0	0	0	0	0	0	0	0	0	0	0	0	0.2418	0	0	0
Solyc09g083007.1	5.7586	8.5983	9.8556	3.3645	6.9821	7.0441	7.2953	6.7544	7.4709	6.9604	7.1065	8.1815	2.3615	2.8366	3.2689	5.6837	5.9058	5.191
Solyc04g080877.1	0	0	0	0	0	0	0	0	0	0	0	0	0	0	0	0	0	0
Solyc01g090965.1	108.135	173.669	117.099	24.3639	13.5163	7.8456	160.266	137.198	111.856	96.7655	170.095	124.418	8.871	9.1901	12.5724	41.2961	65.6991	87.5511
Solyc03g044237.1	0	0	0	0	0	0	0	0	0	0	0	0	0	0	0	0	0	0
Solyc10g005240.3	0	0	0.0646	0.0546	0.0911	0	0.0332	0.0236	0	0	0	0	0	0	0.0444	0	0	0
Solyc02g083790.4	1.4167	4.2195	3.485	0.2965	0.3709	0.4935	0.9007	1.284	1.1308	5.4721	3.1771	4.312	0.2927	0.1012	0.1182	0.4532	0.1079	0.1747
Solyc12g036475.1	0	0	0	0	0	0	0	0	0	0	0	0	0	0	0	0	0	0
Solyc11g071960.2	0.4225	0.9531	0.6137	9.1828	7.3786	7.7806	1.1037	1.3334	1.4262	2.5678	2.339	3.5163	9.4135	8.3303	9.979	2.9794	2.4516	2.2541
Solyc12g005970.1	11.8158	9.4689	7.4383	7.3939	7.2716	7.5025	9.1301	11.2404	9.2183	7.0857	6.77	5.8047	3.1339	3.8365	3.5022	4.8848	4.1784	4.6627
Solyc01g098300.1	0	0	0	0	0	0	0	0	0	0	0	0	0	0	0	0	0	0
Solyc06g072930.4	10.2808	9.6033	8.8049	21.0785	21.1163	21.6395	12.1192	13.7306	12.951	13.9987	11.7172	17.4419	24.2888	17.0744	17.4481	14.4825	11.9652	16.2631
Solyc00g500106.1	0.0487	0	0.0126	0.6095	0.5981	0.5073	0	0	0	0.2234	0.2337	0	0.3578	0.5214	0.0734	0.2792	0.2314	0.3071
Solyc08g065980.3	21.2124	21.5321	21.3871	22.8299	27.0846	28.1516	16.849	15.0452	17.4629	18.8343	17.1027	16.4008	17.9411	17.1416	15.7048	16.0224	16.6578	14.688
Solyc11g065330.1	0	0	0	0	0	0	0	0	0	0	0	0	0	0	0	0	0	0
Solyc08g078630.4	5.7815	6.0445	5.4758	7.038	8.1201	9.7892	7.0414	7.9808	7.66	4.9236	3.9562	4.9361	5.3396	5.1849	5.0289	6.3493	5.2611	4.681
Solanum_lycopersicum_newGene_3523	0	0	0	0	0	0	0	0	0	0	0.0709	0.1448	0	0	0	0	0	0
Solyc07g008075.1	5.1842	4.5494	4.9457	7.1715	7.0531	6.5684	7.1654	6.0954	6.4219	4.3461	6.0482	5.4674	7.9673	9.2548	7.9064	6.3309	6.6229	4.9035
Solanum_lycopersicum_newGene_3527	151.764	107.153	154.004	29.4767	16.9805	22.7606	44.1725	51.7429	66.1198	98.4387	174.923	119.882	14.5167	11.0224	12.5686	65.4749	81.4823	82.4753
Solanum_lycopersicum_newGene_3525	0.4977	0	0	0.0177	0.58	0.4137	0.028	0.3249	0.0339	0.1742	0	0.4643	0.1497	0.2224	0.1831	0.1561	0.0402	0.0373
Solyc03g082890.3	60.525	46.1	51.6458	83.0783	64.7962	67.1312	71.0826	62.014	59.592	102.286	87.7674	95.2089	83.9339	75.0551	82.6743	80.3349	75.7097	88.9566
Solanum_lycopersicum_newGene_3529	0.6571	0.2071	0.7123	0	0.3077	0	0.1227	0.436	0.1956	0.5103	0.1721	0.1241	0	0	0	0.0532	0	0
Solyc08g081110.2	2.5201	2.8597	1.8161	5.823	3.8636	4.3017	4.6935	4.6781	4.2901	3.2637	3.2225	3.2512	3.8476	4.8176	3.7917	3.3504	4.437	4.1613
Solyc02g094740.1	0	0	0.0753	0.3269	0.0603	0.071	0	0	0	0.0545	0	0	0	0	0	0	0	0
Solyc09g010230.2	9.5017	15.7024	14.6285	21.9934	33.3374	26.6999	7.553	15.5241	12.6389	11.7878	9.6451	8.8458	10.5244	6.592	8.8441	4.4881	3.8572	4.6611
Solyc06g064790.1	0	0	0	0	0	0	0	0	0	0	0	0	0	0	0	0	0	0
Solyc11g013030.2	11.8489	23.8388	27.8191	9.5458	11.0927	11.859	11.3653	9.9748	10.5594	24.0205	30.6492	19.6933	8.8281	8.6172	8.677	7.7941	9.1924	8.2613
Solyc04g081530.1	117.944	174.488	119.558	97.6408	169.859	110.866	63.3811	164.066	130.811	48.8945	52.6936	38.151	18.5353	8.7412	8.7637	18.6821	15.6589	13.5286
Solyc12g049080.3	0	0	0	0	0	0	0	0	0	0	0	0.0278	0	0	0	0	0	0
Solyc10g046935.1	0	0	0	0	0	0	0	0	0	0	0	0	0	0	0	0	0	0
Solyc02g084170.2	0	0.6822	0.1034	0.0748	0.3102	0.1654	0	0.5174	0.4244	0.0296	0	0	0.2055	0	0	0	0	0
Solyc03g115250.4	11.9703	13.7876	13.9292	16.2501	17.1866	15.8921	12.3798	11.2091	13.3871	10.3455	9.2741	10.0124	9.6227	8.964	8.8371	8.6973	8.7741	6.9474
Solyc02g081430.3	23.2646	30.3748	52.9978	40.8046	39.7692	44.5396	19.9735	21.0504	26.2607	41.5219	40.0137	32.2709	31.2067	31.7257	26.1191	23.3801	18.1999	17.8014
Solyc02g021670.2	0	0	0	0	0	0	0	0	0	0	0	0	0	0	0	0	0	0
Solanum_lycopersicum_newGene_3377	0	0	0	0	0	0	0	0	0	0	0	0	0	0	0	0	0	0.1487
Solyc12g049611.1	3.7823	4.6481	4.3379	3.9293	5.3177	6.4959	4.2768	2.7757	3.9217	3.4301	2.8017	3.4386	5.6907	5.7898	6.3058	4.9793	5.1376	5.5634
Solyc12g019220.1	0	0	0	0	0	0	0	0	0	0	0	0	0	0	0	0	0	0
Solyc10g055210.3	0	0	0	0	0	0	0	0	0	0	0	0.2258	0	0	0	0	0	0
Solyc03g071735.1	0	0	0	0	0.2268	0	0	0	0	0	0	0	0	0	0	0	0	0
Solyc03g113825.1	0	0	0	0	0	0	0	0	0	0	0	0	0	0	0	0	0	0
Solyc05g014130.3	1.8402	1.8173	1.8932	2.6985	4.3015	4.2934	1.0781	0.8287	1.1353	2.5743	2.0016	2.3526	1.8495	1.8396	1.685	1.8602	1.5126	1.4526
Solyc04g045480.3	34.9039	39.4522	35.4849	28.8176	32.9003	32.2226	40.4967	44.308	40.3586	35.3848	37.7572	34.1891	30.0245	26.6187	29.9599	33.2742	33.7529	30.9968
[truncated: 33,745 more rows]
