# Supplementary material
Source: MDPI journal article supplement (https://www.mdpi.com/2311-7524/9/2/242)
Supplement: s1 [file s1 › Supplementary Table S9-S10.pdf]

**Table S9.** Primers for qRT-PCR

| Gene ID        | Gene annotation                                                            | sequence                                                  |
|----------------|----------------------------------------------------------------------------|-----------------------------------------------------------|
| Solyc12g036470 | transcription factor BEE<br>1-like                                         | F:AGAAAGTAGCTCTGCTTACTCATCC<br>R:CTTGGCTCTTACATGCACTACTTG |
| Solyc06g062460 | transcription factor<br>bHLH87-like                                        | F: AGTCCCAGTTTGTAGCCTAATGG<br>R: AATTCGCCTGATGTGTCCGT     |
| Solyc07g062710 | basic leucine zipper 61-like                                               | F: TGCCGAGGAAACGGATTGAG<br>R: CGTACTCGACGGATTCTGAACA      |
| Solyc01g111500 | myb-related protein 308                                                    | F:ATTAAAACTCACGGCGAAGGTTG<br>R: CGCGTTTAAGGTCCGGTCT       |
| Solyc09g008640 | wall-associated receptor<br>kinase-like 20                                 | F: ACGAATCCCAACTGTGGCAA<br>R: CACAGGTACCAGGCATCCAG        |
| Solyc08g079740 | probable LRR receptor-like<br>serine/threonine-protein kinase<br>At1g12460 | F: GTTAGGGACCCTTCAGCACC<br>R: CAGTGCTGGTTCCAGGATAACT      |
| Solyc01g107190 | LOB domain-containing<br>protein 37                                        | F: TCCGAATCTCAACGACCAGC<br>R: ACTGTTTCTACCGCCGACTG        |
| Solyc02g092550 | LOB domain-containing<br>protein 37                                        | F: CCGAAGATGCAGAAACGACG<br>R: GTTCCAGGTCGCCGATGATT        |
| Solyc04g009130 | Putative disease resistance<br>RPP13-like protein 3                        | F: GTTCCTTCGTCTCGATGGTCTT<br>R:AAGGAGTTCTCTCCACGTCTTTC    |
| Solyc10g076410 | abscisic acid receptor<br>PYL4-like                                        | F: CGGATCTCAGCACCGGTATC<br>R: CTACGTTACCGTCTCCGTCCG       |

**Table S10.** Primers for VIGS vector construction and detection

| Gene annotation | sequence                                             |
|-----------------|------------------------------------------------------|
| WAKL20          | F: AATCTCAAGAGCACTCAACA<br>R: ATCCAGGAGTATGTTTGTAGA  |
| TRV2            | F: GACATTGTTACTCAAGGAAGC<br>R: CGGATCTACTTAAAGAACCGT |
| TRV1            | F: GAAAATATTGCTGCGCCTAACG<br>R: ACCTGCCACGGTTCGAAGTA |
